# Supplementary material for: Ethynyl-Tetrazines: A Clickable Reagent for Universal Access to Rapid and Stable Bioorthogonal Probes
Source: Research Square preprint supplement (doi:10.21203/rs.3.rs-2923887/v1), 2023-05-16

Supporting Information

**Ethynyl-Tetrazines: A Clickable Reagent for Universal Access to Rapid and Stable Bioorthogonal Probes**

Haojie Yanga,✝, Hongbao Suna,✝, Yinghan Chenb,✝, Fang Yuana, Cheng Yanga, Xiaoai Wuc, Wei Chenc, Yong Liangb,* and

Haoxing Wua, d*

aDepartment of Radiology and Huaxi MR Research Center (HMRRC), Functional and Molecular Imaging Key Laboratory of Sichuan Province and Frontiers Science Center for Disease Related Molecular Network, West China Hospital, Sichuan University, Chengdu 610041, Sichuan, China. E-mail: haoxingwu@scu.edu.cn

bState Key Laboratory of Coordination Chemistry, Jiangsu Key Laboratory of Advanced Organic Materials, School of Chemistry and Chemical Engineering, Chemistry and Biomedicine Innovation Center, Nanjing University, Nanjing 210023, Jiangsu, China. E-mail: yongliang@nju.edu.cn

cDepartment of Nuclear Medicine & Laboratory of Clinical Nuclear Medicine, West China Hospital, Sichuan University, Chengdu 610041, Sichuan, China.

dKey Laboratory of Drug-Targeting and Drug Delivery System of the Education Ministry and Sichuan Province, Sichuan University

✝These authors contributed equally to this work.

Table of Contents

1. General information.…………………………………………………………………………………………………………………………...S1

2. Preparation of ethynyl-tetrazines…...……………………………………….......................................................................................S1

2.1 General procedure for the synthesis of ethynyl-tetrazines…………………...........................................................................S1

2.2. Optimization of Liebeskind−Srogl coupling reaction conditions.........................................................................................S2

2.3 Preparation and characterization of ethynyl-tetrazines……………………………………….……………………………….......S3

2.4 Stability of ethynyl-tetrazines...................................................................................................................................................S8

3. General procedure for the synthesis of triazolyl-tetrazines….……………………………………………………………………….S11

4. Protein dual-labeling using triazolyl-tetrazine bioorthogonal probe.……………………….………………………………….......S17

5. Stability and bioorthogonal reaction kinetics………………..…………………………………………………………………….…...S18

5.1 Stability test…………………....................................................................................................................................................S18

5.2. Bioorthogonal reaction kinetics………………………………………......................................................................................S20

6. Radiosynthesis of 18F-labeled triazolyl-tetrazines……………...……………………………………………………………………...S21

6.1 General information of radiosynthesis………………….........................................................................................................S21

6.2. General procedure for preparation of 18F-labeled triazolyl-tetrazines...............................................................................S22

6.3 *In vitro* stability of 18F-5f……………………………………………………………………………………………………………......S25

6.4 *In vivo* PET imaging................................................................................................................................................................S25

7. Computational analysis………………………..………………...………………………………………………………………………...S27

7.1 Computational methods……………………………………………………………………………..……………………..……….....S27

7.2 Coordinates and energies of stationary points……………………………………………………………………………….…...S27

8. References………………..…………………………………………………………………………………………………………………..S33

9. NMR spectra…………………………………………………………………………………………………………………………………..S34

**1. General information**

Commercially available reagents were purchased from J&K Scientific, TCI, Energy Chemical, and Bide Pharm, and used without further purification unless otherwise noted. Thin-layer chromatography (TLC) was performed on 0.20 mm silica gel plates and monitored under ultraviolet (UV) light. Flash column chromatography was performed using silica gel (300–400 mesh) from Qingdao Haiyang Chem. Company, Ltd. (Qingdao, China). NMR spectroscopy was performed on Bruker nuclear magnetic resonance spectrometer at 400 MHz for 1H NMR, 376 MHz for 19F NMR, and 101 MHz for 13C NMR. All 13C NMR spectra were proton decoupled. Chemical shifts were reported as δ in parts per million (ppm) using tetramethylsilane (TMS, 0.00 ppm) or residual deuterated solvent as an internal reference (CDCl3: 7.26 ppm for 1H NMR and 77.2 ppm for 13C NMR; DMSO-*d*6: 2.50 ppm for 1H NMR and 39.5 ppm for 13C NMR; CD3OD: 3.31 ppm for 1H NMR and 49.5 ppm for 13C NMR). Resonance multiplicities were indicated as s (singlet), d (doublet), t (triplet), q (quartet), dd (doublet of doublets), and m (multiplet). Coupling constants (*J*) were reported in Hertz (Hz), and the number of protons (n) for a given resonance was indicated as nH. High-resolution mass spectra (HRMS) were recorded on a Bruker micro-TOF-QII time-of-flight mass spectrometer with electrospray ionization. UV-Vis absorption data was collected on a Quawell scientific Q6000+ microvolume spectrophotometer.

All radiochemical yields (RCY) quoted are decay corrected and are reported as isolated RCY. All RCY were calculated with respect to the starting 18F activity of **18F-N3**. The identities of the 18F-labeled compounds were confirmed by comparison to the corresponding 19F standards. High-performance liquid chromatography-mass spectrometry (HPLC-MS) was performed on an Agilent 1260 Infinity HPLC system equipped with a G7129A 1260 autosampler, a G7111B 1260 Quat Pump, and a G7155A 1260 DAD detector connected to a G6125B single-quadrupole LC/MS system. An Agilent ZORBAX SB-C18 column (5 μm, 4.6🞨250 mm) was used for HPLC-MS analysis. The solvent composition was controlled by a gradient program. Low-resolution mass spectra were obtained in positive ESI mode in the range 200–2000 m/z.

All commercial azides and **TCO-Cy5** were purchased from Xi'an Dianhua Biotechnology Co., Ltd. The following compounds used in the study were synthesized according to the corresponding references: 1-azido-2-(2-(2-fluoroethoxy)ethoxy)ethane[1], **Ph-Tz**[2], **Me-Tz**[3], **Py-Tz**[4], **H-Tz**[5], *trans*-cyclooctene (**TCO**)[6], and *cis*-dioxolane-fused *trans*-cyclooctene (**d-TCO**)[6].

The predicted octanol/water partition coefficient (milog *P*) was calculated using the software Molinspiration Property Calculator (https://www.molinspiration.com/cgi-bin/properties).

2. Preparation of ethynyl-tetrazines

*2.1. General procedure for the synthesis of ethynyl-tetrazines*

To the mixture of PdCl2(PPh3)2 (28.0 mg, 0.04 mmol, 20 mol%) and CuI (76.2 mg, 0.4 mmol, 2.0 equiv.) in 1.4-dioxane (2.0 mL), was successively added **1** (0.2 mmol, 1.0 equiv.) and **2** (147 μL, 0.4 mmol, 2.0 equiv.) under argon atmosphere. The reaction mixture was heated at 50 °C for 12 h. After reaction completion, as monitored by TLC, the reaction mixture was concentrated under reduced pressureand the residue was subjected to silica gel column chromatography (PE:EtOAc = 50:1 to 5:1) to afford the corresponding crude product. The crude product was dissolved in dry MeOH (10 mL), and K2CO3 (2.8 mg, 0.1 equiv.) was added. The mixture was stirred at r.t. for 1–5 min. After reaction completion as monitored by TLC, the reaction was immediately extracted with DCM (3🞨20 mL), and washed with brine. (**Caution!** Dry solvent is necessary and when the reaction is completed, it needs to be worked up immediately.) The combined organic extracts were dried with anhydrous Na2SO4, filtered, and concentrated under reduced pressureand the residue was purified by silica gel column chromatography (PE:EtOAc = 50:1 to 5:1) to afford the corresponding product **4.**

*2.2. Optimization of Liebeskind−Srogl coupling reaction conditions*

**Table S1.** Optimization reaction conditions.[a]~~]~~

| Entry | “Pd” Cat. (20 mol%) | Cu(I) (2.0 equiv.) | Temperature/Time | Concentration | Yield[b] |
| --- | --- | --- | --- | --- | --- |
| 1 | PdCl2(PPh3)2 | CuTc | 100 °C/1 h | 10 mM | 61% |
| 2 | PdCl2(PPh3)2 | CuI | 100 °C/1 h | 10 mM | 52% |
| 3 | PdCl2(PPh3)2 | CuBr | 100 °C/1 h | 10 mM | 18% |
| 4 | PdCl2(PPh3)2 | CuCl | 100 °C/1 h | 10 mM | 21% |
| 5 | PdCl2(PPh3)2 | CuTc | 75 °C/12 h | 10 mM | 45% |
| 6 | PdCl2(PPh3)2 | CuTc | 50 °C/12 h | 10 mM | 65% |
| 7 | PdCl2(PPh3)2 | CuTc | r.t./12 h | 10 mM | 22% |
| 8 | PdCl2(PPh3)2 | CuI | 50 °C/12 h | 10 mM | 87% |
| 9 | PdCl2(PPh3)2 | CuI | 50 °C/12 h | 20 mM | 93% |
| 10 | Pd(PPh3)4 | CuI | 50 °C/12 h | 20 mM | 83% |
| 11 | PdCl2(PPh3)2 | CuTc | 50 °C/12 h | 20 mM | 54% |
| 12 | PdCl2(PPh3)2 | CuI | 50 °C/12 h | 0.1 M | 91% |
| 13 | PdCl2(PPh3)2 | CuI | r.t./24 h | 0.1 M | 77% |
| 14 | PdCl2(PPh3)2 | CuI | 100 °C/1 h | 0.1 M | 81% |
| 15 | Pd(PPh3)4 | CuI | 50 °C/12 h | 0.1 M | 77% |
| 16 | Pd2(dba)3/40 mol% PPh3 | CuI | 50 °C/12 h | 0.1 M | 34% |
| 17 | Pd(OAc)2/40 mol% PPh3 | CuI | 50 °C/12 h | 0.1 M | 57% |
| 18 | PdCl2(PPh3)2 (10 mol%) | CuI | 50 °C/12 h | 0.1 M | 79% |
| 19 | PdCl2(PPh3)2 | CuI (1.0 equiv.) | 50 °C/12 h | 0.1 M | 67% |
| 20[c] | PdCl2(PPh3)2 | CuI | 50 °C/12 h | 0.1 M | 71% |

[a] Reaction conditions: unless other wised noted, **1a** (10.2 mg, 0.05 mmol, 1.0 equiv.), **2a** (36.7 μL, 0.10 mmol, 2.0 equiv.), “Pd” Cat. (20 mol%), Cu(I) (2.0 equiv.) were used. [b] The yield of **3a** was determined by 1H NMR with mesitylene as an internal standard. [c] **2a** (27.5 μL, 0.075 mmol, 1.5 equiv.).

*2.3 Preparation and characterization of ethynyl-tetrazines*

*2.3.1 Synthesis of tetrazine 4a*

The general procedure described above was followed to prepare compound **4a** from **1a**[7] (1.02 g, 5.0 mmol, 1.0 equiv.) and **2** (3.67 mL, 10 mmol, 2.0 equiv.). Purification by silica column chromatography afforded **4a** as a red solid (0.63 g, 3.47 mmol, 69%). **1H NMR** (**400 MHz**, **DMSO**) δ 8.51–8.49 (m, 2H), 7.76–7.67 (m, 3H), 5.31 (s, 1H).**13C NMR** (**101 MHz**, **DMSO**)δ 161.3, 155.6, 133.1, 131.4, 129.6, 128.1, 89.2, 77.8. HRMS (DART-TOF) calculated for C10H6N4Na+ [M + Na]+ m/z 205.0485, found 205.0491.

*2.3.2 Synthesis of tetrazine 4b*

The general procedure described above was followed to prepare compound **4b** from **1b**[7] (1.17 g, 5.0 mmol, 1.0 equiv.) and **2** (3.67 mL, 10 mmol, 2.0 equiv.). Purification by silica column chromatography afforded **4b** as a red solid (632 mg, 2.98 mmol, 60%). **1H NMR** (**400 MHz**, **CDCl3**) δ 8.59 (d, *J* = 9.0 Hz, 2H), 7.10 (d, *J* = 9.0 Hz, 2H), 3.93 (s, 3H), 3.71 (s, 1H). **13C NMR** (**101 MHz**, **CDCl3**) δ 164.2, 161.8, 155.7, 130.8, 123.6, 115.1, 85.4, 77.4, 55.7. HRMS (DART-TOF) calculated for C11H8N4NaO+ [M + Na]+ m/z 235.0590, found 235.0580.

*2.3.3 Synthesis of tetrazine 4c*

The general procedure described above was followed to prepare compound **4c** from **1c**[8] (40.0 mg, 0.2 mmol, 1.0 equiv.) and **2** (146.8 μL, 0.4 mmol, 2.0 equiv.). Purification by silica column chromatography afforded **4c** as a red solid (29.2 mg, 0.146 mmol, 73%). **1H NMR** (**400 MHz**, **CDCl3**) δ 8.66 (dd, *J* = 9.0, 5.3 Hz, 2H), 7.30 (t, *J* = 8.6 Hz, 2H), 3.76 (s, 1H). **13C NMR** (**101 MHz**, **CDCl3**) δ 166.4 (d, *J* = 256.9 Hz), 161.4, 156.2, 131.2 (d, *J* = 9.3 Hz), 127.5 (d, *J* = 3.1 Hz), 117.0 (d, *J* = 22.2 Hz), 86.2, 77.3. **19F NMR** (**377 MHz**, **CDCl3**)δ: −104.6. HRMS (DART-TOF) calculated for C10H6FN4+ [M + H]+ 201.0571, found 201.0572.

*2.3.4 Synthesis of tetrazine 4d*

The general procedure described above was followed to prepare compound **4d** from **1d**[7] (319 mg, 1.0 mmol, 1.0 equiv.) and **2** (734 μL, 2.0 mmol, 2.0 equiv.). Purification by silica column chromatography afforded **4d** as a red solid (36.8 mg, 0.124 mmol, 62%). **1H NMR** (**400 MHz**, **CDCl3**) δ 8.57 (d, *J* = 8.9 Hz, 2H), 7.61 (d, *J* = 8.9 Hz, 2H), 6.77 (s, 1H), 3.72 (s, 1H), 1.55 (s, 9H).**13C NMR** (**101 MHz**, **CDCl3**) δ 161.7, 155.9, 152.2, 143.6, 130.1, 125.3, 118.6, 85.6, 81.7, 77.4, 28.4. HRMS (DART-TOF) calculated for C15H16N5O2+ [M + H]+ m/z 298.1299, found 298.1290.

*2.3.5 Synthesis of tetrazine 4e*

The general procedure described above was followed to prepare compound **4e** from **1e**[7] (41.4 mg, 0.2 mmol, 1.0 equiv.) and **2** (146.8 μL, 0.4 mmol, 2.0 equiv.). Purification by silica column chromatography afforded **4e** as a red solid (21.5 mg, 0.104 mmol, 52%). **1H NMR** (**400 MHz**, **DMSO**) δ 8.64 (d, *J* = 8.5 Hz, 2H), 8.16 (d, *J* = 8.5 Hz, 2H), 5.40 (s, 1H). **13C NMR** (**101 MHz**, **DMSO**) δ 160.5, 155.6, 135.7, 133.4, 128.7, 118.2, 115.1, 90.0, 77.7. HRMS (DART-TOF) calculated for C11H5N5 [M]- m/z 207.0550, found 207.0552.

*2.3.6 Synthesis of tetrazine 4f*

The compound **1f** was prepared according to the reported method[7] as a red solid (1.26 g, 6.0 mmol, 61%). **1H NMR** (**400 MHz**, **CDCl3**) δ 8.16 (dd, *J* = 3.8, 1.2 Hz, 1H), 7.62 (dd, *J* = 5.0, 1.2 Hz, 1H), 7.21 (dd, *J* = 5.0, 3.8 Hz, 1H), 2.75 (s, 3H). **13C NMR** (**101 MHz**, **CDCl3**) δ 174.5, 160.4, 135.6, 131.9, 130.5, 128.9, 13.5.HRMS (DART-TOF) calculated for C7H6N4NaS2+ [M + Na]+ m/z 232.9926, found 232.9934.

The general procedure described above was followed to prepare compound **4f** from **1f** (37.6 mg, 0.2 mmol, 1.0 equiv.) and **2** (146.8 μL, 0.4 mmol, 2.0 equiv.). Purification by silica column chromatography afforded **4f** as a red solid (27.4 mg, 0.146 mmol, 73%). **1H NMR** (**400 MHz, CDCl3**)δ 8.34 (dd, *J* = 3.9, 1.2 Hz, 1H), 7.77 (dd, *J* = 5.0, 1.2 Hz, 1H), 7.29 (dd, *J* = 5.0, 3.8 Hz, 1H), 3.73 (s, 1H). **13C NMR** (**101 MHz**, **CDCl3**) δ 160.1, 155.5, 135.4, 134.5, 133.0, 129.5, 85.8, 77.4. HRMS (DART-TOF) calculated for C8H5N4S+ [M + H]+ m/z 189.0229, found 189.0229.

*2.3.7 Synthesis of tetrazine 4g*

The compound **1g** was prepared according to the reported method[7] as a red solid (3.0 g, 9.8 mmol, 62%). **1H NMR** (**400 MHz**, **CDCl3**) δ 8.58 (d, *J* = 8.6 Hz, 2H), 8.17 (d, *J* = 8.7 Hz, 2H), 2.81 (s, 3H), 1.63 (s, 9H). **13C NMR** (**101 MHz**, **CDCl3**) δ 175.9, 165.1, 162.0, 135.4, 135.2, 130.3, 127.4, 81.9, 28.3, 13.6. HRMS (DART-TOF) calculated for C14H17N4O2S+ [M + H]+ m/z 305.1067, found 305.1063.

The general procedure described above was followed to prepare compound **4g** from **1g**[7] (1.52 g, 5.0 mmol, 1.0 equiv.) and **2** (3.67 mL, 10 mmol, 2.0 equiv.). Purification by silica column chromatography afforded **4b** as a red solid (0.93 g, 3.3 mmol, 66%). **1H NMR** (**400 MHz**,**CDCl3**) δ 8.68 (d, *J* = 8.6 Hz, 2H), 8.20 (d, *J* = 8.6 Hz, 2H), 3.79 (s, 1H), 1.64 (s, 9H). **13C NMR** (**101 MHz**, **CDCl3**)δ 164.9, 161.7, 156.5, 136.4, 134.6, 130.4, 128.5, 86.6, 82.1, 77.3, 28.3. HRMS (DART-TOF) calculated for C15H15N4O2+ [M + H]+ m/z 283.1190, found 283.1187.

*2.3.8 Synthesis of tetrazine 4h*

To a solution of **4g** (50.0 mg, 0.18 mmol) in 500 µL of dry DCM was added 50 µL of trifluoroacetic acid (TFA). The mixture was stirred at r.t. for 2 h. Red solids are precipitated, filtered directly, washed with *n*-pentane. The compound **4h** (35 mg, 0.15 mmol) was obtained in 83% yield as a red solid. **1H NMR** (**400 MHz**, **DMSO**) δ 8.59 (d, *J* = 8.0 Hz, 2H), 8.22 (d, *J* = 8.1 Hz, 2H), 5.36 (s, 1H). **13C NMR** (**101 MHz**, **DMSO**)δ 166.6, 160.9, 155.6, 135.2, 134.5, 130.3, 128.3, 89.6, 77.8. HRMS (DART-TOF) calculated for C11H5N4O2+ [M - H]- m/z 225.0418, found 225.0419.

*2.3.9 Synthesis of tetrazine 4i*

To a solution of **4h** (30.0 mg, 0.13 mmol) in 500 µL of dry DMF was added (34 µL, 0.20 mmol) of pentafluorophenyl trifluoroacetate. The mixture was stirred at r.t. under argon atmosphere for 12 h. The reaction was extracted with EtOAc (3🞨5 mL), and washed with brine. The combined organic extracts were dried with anhydrous Na2SO4, filtered, and concentrated under reduced pressure and the residue was purified by silica gel column chromatography (PE:DCM = 5:1 to 3:1) as a red solid (42.5 mg, 83% yield). **1H NMR** (**400 MHz**, **CDCl3**) δ 8.83 (d, *J* = 8.7 Hz, 2H), 8.44 (d, *J* = 8.7 Hz, 2H), 3.83 (s, 1H). **13C NMR** (**400 MHz**, **CDCl3**)δ 162.0, 161.4, 156.7, 142.9–142.6 (m), 141.04–141.0, 140.4–140.1 (m), 139.7–139.3 (m), 138.7–138.4 (m), 136.7, 131.7, 131.1, 129.0,125.3 (m), 87.1, 77.4. **19F NMR** (**377 MHz**, **CDCl3**) δ −152.2 to −152.3 (m, 2F), −157.2 (t, *J* = 21.9 Hz, 1F), −161.8 to −161.9 (m, 2F). HRMS (DART-TOF) calculated for C17H6F5N4O2+ [M + H]+ m/z 393.0405, found 393.0487.

*2.3.10 Synthesis of tetrazine 4j*

The general procedure described above was followed to prepare compound **4j** from **1j** (62.2 mg, 0.2 mmol, 1.0 equiv.) and **2** (146.8 μL, 0.4 mmol, 2.0 equiv.). Purification by silica column chromatography afforded **4j** as a red solid (29.8 mg, 0.096 mmol, 48%). **1H NMR** (**400 MHz**, **CDCl3**) δ 8.59 (d, *J* = 8.2 Hz, 2H), 7.52 (d, *J* = 8.1 Hz, 2H), 5.00 (s, 1H), 4.44 (d, *J* = 6.2 Hz, 2H), 3.75 (s, 1H), 1.48 (s, 9H). **13C NMR** (**101 MHz**, **CDCl3**)δ 162.0, 156.3, 156.1, 145.2, 130.2, 129.1, 128.3, 86.0, 80.1, 77.4, 44.5, 28.5. HRMS (DART-TOF) calculated for C16H17N5NaO2+ [M + Na]+ m/z 334.1274, found 334.1272.

*2.3.11 Synthesis of tetrazine 4k*

The compound **1k** was prepared according to the reported method[7] as a red solid (2.18 g, 9.6 mmol, 52%). **1H NMR** (**400 MHz**, **CDCl3**) δ 8.47 (d, *J* = 8.3 Hz, 2H), 7.47 (d, *J* = 8.3 Hz, 2H), 3.63 (s, 2H), 2.78 (s, 3H), 1.45 (s, 9H). **13C NMR** (**101 MHz**, **CDCl3**) δ 175.3, 170.3, 162.3, 139.4, 130.4, 130.3, 127.7, 81.4, 42.8, 28.1, 13.5. HRMS (DART-TOF) calculated for C15H18N4NaO2S+ [M + Na]+ m/z 341.1043, found 341.1043.

The general procedure described above was followed to prepare compound **4k** from **1k** (59.2 mg, 0.2 mmol, 1.0 equiv.) and **2** (146.8 μL, 0.4 mmol, 2.0 equiv.). Purification by silica column chromatography afforded **4k** as a red solid (35.5 mg, 0.12 mmol, 60%). **1H NMR** (**400 MHz**, **CDCl3**) δ 8.58 (d, *J* = 8.5 Hz, 2H), 7.52 (d, *J* = 8.4 Hz, 2H), 3.75 (s, 1H), 3.65 (s, 2H), 1.45 (s, 9H). **13C NMR** (**101 MHz**, **CDCl3**)δ 170.1, 162.0, 156.2, 140.8, 130.5, 129.9, 128.9, 86.0, 81.6, 77.4, 42.9, 28.2. HRMS (DART-TOF) calculated for C16H16N4NaO2+ [M + Na]+ m/z 319.1165, found 319.1165.

*2.3.12 Synthesis of tetrazine 4l*

The compound **1l** was prepared according to the reported method[7] as a red liquid (2.8 g, 16.3 mmol, 65%). **1H NMR** (**400 MHz**, **CDCl3**) δ 4.96 (s, 2H), 3.57 (s, 3H), 2.75 (s, 3H). **13C NMR** (**101 MHz**, **CDCl3**) δ 177.0, 164.1, 72.1, 59.6, 13.5.HRMS (DART-TOF) calculated for C5H8N4NaOS+ [M + Na]+ m/z 195.0311.1050, found 195.0310.

The general procedure described above was followed to prepare compound **4l** from **1l** (30.0 mg, 0.2 mmol, 1.0 equiv.) and **2** (146.8 μL, 0.4 mmol, 2.0 equiv.). Purification by silica column chromatography afforded **4l** as a red liquid (12 mg, 0.08 mmol, 40%). **1H NMR** (**400 MHz**, **CDCl3**) δ 5.09 (s, 2H), 3.75 (s, 1H), 3.62 (s, 3H). **13C NMR** (**101 MHz**, **CDCl3**) δ 165.0, 157.4, 86.4, 77.4, 72.2, 60.0. HRMS (DART-TOF) calculated for C6H6N4NaO+ [M + Na]+ m/z 173.0434, found 173.0426.

*2.3.13 Synthesis of tetrazine 4m*

The general procedure described above was followed to prepare compound **4m** from **1m** (38.4 mg, 0.2 mmol, 1.0 equiv.) and **2** (146.8 μL, 0.4 mmol, 2.0 equiv.). Purification by silica column chromatography afforded **4m** as a red solid (15.7 mg, 0.082 mmol, 41%). **1H NMR** (**400 MHz**, **CDCl3**) δ 3.73–3.63 (m, 6H), 3.09 (t, *J* = 7.0 Hz, 2H). **13C NMR** (**101 MHz**, **CDCl3**)δ 172.4, 167.5, 156.6, 85.8, 77.4, 52.2, 30.5, 30.2. HRMS (DART-TOF) calculated for C8H9N4O2+ [M + H]+ m/z 193.0720, found 193.0721.

*2.3.14 Synthesis of tetrazine 4n*

The compound **1n** was prepared according to the reported method[7] as a red solid (2.32 g, 7.1 mmol, 42%). **1H NMR** (**400 MHz**, **CDCl3**) δ 5.52 (d, *J* = 8.3 Hz, 1H), 4.79–4.74 (m, 1H), 3.73 (dd, J = 15.0, 4.8 Hz, 1H), 3.68 (s, 3H), 3.62–3.56 (m, 1H), 2.64 (s, 3H), 1.28 (s, 9H). **13C NMR** (**101 MHz**, **CDCl3**) δ 175.8, 171.1, 164.3, 155.0, 80.1, 52.7, 52.0, 37.1, 28.1, 13.2. HRMS (DART-TOF) calculated for C12H19N5NaO4S+ [M + Na]+ m/z 352.1050, found 352.1050.

The general procedure described above was followed to prepare compound **4n** from **1n** (61.4 mg, 0.2 mmol, 1.0 equiv.) and **2** (146.8 μL, 0.4 mmol, 2.0 equiv.). The coupling reaction in the first step was carried out at 80 °C for 2 h. Purification by silica column chromatography afforded **4n** as a red liquid (17.8 mg, 0.058 mmol, 29%). **1H NMR** (**400 MHz**, **CDCl3**) δ 5.46 (d, J = 7.9 Hz, 1H), 4.90–4.85 (m, 1H), 3.95 (dd, *J* = 14.8, 4.8 Hz, 1H), 3.78 (s, 3H), 3.77–3.74 (m, 1H), 1.37 (s, 9H). **13C NMR** (**101 MHz**, **CDCl3**) δ 171.0, 165.5, 156.6, 155.1, 86.1, 80.7, 77.4, 53.1, 52.2, 38.4, 28.3. HRMS (DART-TOF) calculated for C13H17N5NaO4+ [M + Na]+ m/z 330.1173, found 330.1171.

*2.3.15 Synthesis of tetrazine 4o*

The compound **1o** was prepared according to the reported method[7] as a red solid (3.33 g, 9.6 mmol, 60%). **1H NMR** (**400 MHz**, **CDCl3**) δ 7.28–7.20 (m, 3H), 7.06–7.04 (m, 2H), 5.62–5.58 (m, 1H), 5.49–5.37 (m, 1H), 3.43–3.18 (m, 2H), 2.73 (s, 3H), 1.39 (s, 9H). **13C NMR** (**101 MHz**, **CDCl3**) δ 176.4, 166.7, 155.0, 135.6, 129.4, 128.7, 127.1, 80.2, 54.5, 41.4, 28.3, 13.4. HRMS (DART-TOF) calculated for C16H21N5NaO2S+ [M + Na]+ m/z 370.1308, found 370.1308.

The general procedure described above was followed to prepare compound **4m** from **1m** (65.0 mg, 0.2 mmol, 1.0 equiv.) and **2** (146.8 μL, 0.4 mmol, 2.0 equiv.). Purification by silica column chromatography afforded **4m** as a red liquid (33.1 mg, 0.102 mmol, 51%). **1H NMR** (**400 MHz**, **CDCl3**) δ 7.28–7.22 (m, 3H), 7.04–7.02(m, 2H), 5.70–5.65 (m, 1H), 5.49–5.39 (m, 1H), 3.73 (s, 1H), 3.43–3.27 (m, 2H), 1.39 (s, 9H). **13C NMR** (**101 MHz**, **CDCl3**) δ 167.8, 156.9, 155.2, 135.3, 129.4, 129.0, 127.5, 86.2, 80.6, 77.4, 55.2, 41.3, 28.4. HRMS (DART-TOF) calculated for C17H19N5NaO2+ [M + Na]+ m/z 348.1431, found 348.1438.

*2.4 Stability of ethynyl-tetrazines*

To evaluate the stability of ethynyl-tetrazines, NMR experiments were conducted. To investigate the long-term storage capability of ethynyl-tetrazines, ethynyl-tetrazines were stored in a 4 °C freezer without the protection of N2. After 135 or 150 days, samples were taken and NMR experiments were conducted. To investigate the stability of ethynyl-tetrazines in solvent, ethynyl-tetrazines were stored in CDCl3 in NMR tube at room temperature for 15 days. Then, NMR experiments were conducted.

*2.4.1 Storage stability of ethynyl-tetrazines at 4 °C*

Figure S1. NMR spectra of solid 4a at the start (*top*) or after 150 days (*bottom*) of storage at 4 °C.

Figure S2. NMR spectra of solid 4d at the start (*top*) or after 150 days (*bottom*) of storage at 4 °C.

Figure S3. NMR spectra of solid 4g at the start (*top*) or after 135 days (*bottom*) of storage at 4 °C.

Figure S4. NMR spectra of solid 4h at the start (*top*) or after 135 days (*bottom*) of storage at 4 °C.

*2.4.2 Stability of ethynyl-tetrazines in CDCl3 at room temperature*

Figure S5. NMR spectra of 4I at the start (*top*) or after 15 days (*bottom*) of storage in CDCl3 at room temperature.

Figure S6. NMR spectra of 4m at the start (*top*) or after 15 days (*bottom*) of storage in CDCl3 at room temperature

Figure S7. NMR spectra of 4I at the start (*top*) or after 15 days (*bottom*) of storage in CDCl3 at room temperature.

3. General procedure for the synthesis of triazolyl-tetrazines

The mixture of CuSO4 (0.1 equiv.), tris(3-hydroxypropyltriazolylmethyl)amine (THPTA) (0.1 equiv.) and sodium ascorbate (0.2 equiv.) in 2 mL of DMF/H2O (v/v 4:1) was stirred at r.t. for 10 min. Then, azide (10 mg, 1.0 equiv.) and ethynyl-tetrazine (1.0 equiv.) were added. The reaction mixture was stirred at room temperature. After reaction completion, as monitored by TLC, the reaction was worked up to afford the corresponding product**.**

The general procedure was followed to prepare compound **5a** from **4a** (14.1 mg, mmol, 1.0 equiv.) and ethyl azidoacetate (10.0 mg, mmol, 1.0 equiv.). The reaction was stirred at r.t. for 30 min, then extracted with DCM (3🞨10 mL) and washed with brine. The combined organic extracts were dried with anhydrous Na2SO4, filtered, and concentrated under reduced pressure and the residue was purified by silica gel column chromatography (PE:EtOAc = 5:1 to 2:1) as a red solid (20.5 mg, 85% yield). **1H NMR** (**400 MHz**, **DMSO**) δ 9.20 (s, 1H), 8.54 (d, *J* = 6.2 Hz, 2H), 7.75–7.68 (m, 3H), 5.61 (s, 2H), 4.24 (q, *J* = 7.1 Hz, 2H), 1.26 (t, *J* = 7.2 Hz, 3H).**13C NMR** (**101 MHz**, **DMSO**) δ 167.0, 163.4, 159.5, 141.2, 132.7, 131.9, 129.5, 128.8, 127.6, 61.8, 50.8, 14.0. HRMS (DART-TOF) calculated for C14H13N7NaO2+ [M + Na]+ m/z 334.1023, found 334.1019. milog *P* = 1.43.

The general procedure was followed to prepare compound **5b** from **4h** (12.9 mg, 0.057 mmol, 1.0 equiv.) and 2-[2-(2-azidoethoxy) ethoxy]ethanol (10.0 mg, 0.057 mmol, 1.0 equiv.). The reaction was stirred at r.t. for 60 min, then diluted with water (10 mL), centrifuged (9000 g, 5 min), poured supernatant, added DCM (10 mL), shaken, centrifuged (9000 g, 5 min), poured supernatant, dried and afford the corresponding products as a red solid (20.4 mg, 89% yield).**1H NMR** (**400 MHz**, **DMSO**) δ 9.19 (s, 1H), 8.63 (d, *J* = 8.3 Hz, 2H), 8.23 (d, *J* = 8.3 Hz, 2H), 4.74 (t, *J* = 5.1 Hz, 2H), 4.53 (s, 1H), 3.95 (t, *J* = 5.1 Hz, 2H), 3.60–3.57 (m, 2H), 3.52–3.49 (m, 2H), 3.46 (t, *J* = 5.2 Hz, 2H), 3.38 (d, *J* = 5.2 Hz, 2H).**13C NMR** (**101 MHz**, **DMSO**) δ 166.7, 163.0, 159.6, 141.0, 135.7, 134.1, 130.3, 128.1, 127.7, 72.3, 69.6, 69.6, 68.4, 60.2, 49.9. HRMS (DART-TOF) calculated for C17H19N7NaO5+ [M + Na]+ m/z 424.1340, found 424.1339. milog *P* = 0.15.

The general procedure was followed to prepare compound **5c** from **4d** (16.9 mg, 0.06 mmol, 1.0 equiv.) and 2-[2-(2-azidoethoxy) ethoxy]ethanol (10.0 mg, 0.06 mmol, 1.0 equiv.). The reaction was stirred at r.t. for 60 min, then extracted with DCM (3🞨10 mL) and washed with brine. The combined organic extracts were dried with anhydrous Na2SO4, filtered, and concentrated under reduced pressure and the residue was purified by silica gel column chromatography (DCM:MeOH = 20:1 to 10:1) as a red solid (23.6 mg, 88% yield). **1H NMR** (**400 MHz**, **CDCl3**) δ 8.83 (s, 1H), 8.57 (d, *J* = 8.6 Hz, 2H), 7.60 (d, *J* = 8.6 Hz, 2H), 6.86 (s, 1H), 4.73 (t, *J* = 4.8 Hz, 2H), 3.97 (t, *J* = 4.8 Hz, 2H), 3.78 (t, *J* = 4.5 Hz, 2H), 3.66 (d, *J* = 2.0 Hz, 4H), 3.62–3.59 (m, 2H), 1.54 (s, 9H).**13C NMR** (**101 MHz**, **CDCl3**) δ 164.0, 159.6, 152.3, 143.1, 142.0, 129.5, 127.2, 125.9, 118.5, 81.5, 72.8, 70.7, 70.4, 69.2, 61.9, 50.8, 28.4. HRMS (DART-TOF) calculated for C21H28N8NaO5+ [M + Na]+ m/z 495.2075, found 495.2079. milog *P* = 1.13.

The general procedure was followed to prepare compound **5d** from **4a** (10.0 mg, 0.055 mmol, 1.0 equiv.) and 1-azido-2-(2-(2-fluoroethoxy)ethoxy)ethane[1] (9.6 mg, 0.055 mmol, 1.0 equiv.). The reaction was stirred at r.t. for 60 min, then extracted with DCM (3🞨10 mL) and washed with brine. The combined organic extracts were dried with anhydrous Na2SO4, filtered, and concentrated under reduced pressure and the residue was purified by silica gel column chromatography (DCM:MeOH = 30:1 to 15:1) as a red solid (14.6 mg, 74% yield). **1H NMR** (**400 MHz**, **CDCl3**) δ 8.78 (s, 1H), 8.68–8.63 (m, 2H), 7.66–7.59 (m, 3H), 4.74 (t, *J* = 4.8 Hz, 2H), 4.67–4.61 (m, 1H), 4.55–4.50 (m, 1H), 3.99 (t, *J* = 4.9 Hz, 2H), 3.80–3.76 (m, 1H), 3.71–3.66 (m, 5H).**13C NMR** (**101 MHz**, **CDCl3**) δ 164.5, 160.1, 142.0, 133.0, 131.9, 129.4, 128.3, 127.3, 83.3 (d, *J* = 169.0 Hz), 70.8 (d, *J* = 9.3 Hz), 70.7, 70.5, 69.3, 50.9. **19F NMR** (**377 MHz**, **CDCl3**)δ 18.6. HRMS (DART-TOF) calculated for C16H18FN7NaO2+ [M + Na]+ m/z 382.1398, found 382.1403. milog *P* = 1.26.

The general procedure was followed to prepare compound **5e** from **4m** (12.0 mg, 0.062 mmol, 1.0 equiv.) and 1-azido-2-(2-(2-fluoroethoxy)ethoxy)ethane[1] (11.0 mg, 0.062 mmol, 1.0 equiv.). The reaction was stirred at r.t. for 60 min, then extracted with DCM (3🞨10 mL) and washed with brine. The combined organic extracts were dried with anhydrous Na2SO4, filtered, and concentrated under reduced pressure and the residue was purified by silica gel column chromatography (DCM:MeOH = 30:1 to 15:1) as a red solid (15.6 mg, 68% yield). **1H NMR** (**400 MHz**, **CDCl3**) δ 8.74 (s, 1H), 4.71 (t, *J* = 4.9 Hz, 2H), 4.64–4.61 (m, 1H), 4.52–4.49 (m, 1H), 3.97 (t, *J* = 4.9 Hz, 2H), 3.77–3.75 (m, 1H), 3.71 (t, *J* = 7.1 Hz, 2H), 3.69 (s, 3H), 3.69–3.65 (m, 5H), 3.10 (t, *J* = 7.1 Hz, 2H).**13C NMR** (**101 MHz**, **CDCl3**) δ 172.5, 169.1, 160.5, 141.9, 127.4, 83.3 (d, *J* = 169.9 Hz), 70.8 (d, *J* = 9.3 Hz), 70.7, 70.5, 69.3, 52.1, 50.9, 30.8, 30.0. **19F NMR** (**CDCl3**,**376 MHz**)δ: 18.6. HRMS (DART-TOF) calculated for C14H21FN7O4+ [M+H]+ m/z 370.1634, found 370.1635. milog *P* = –0.74.

The general procedure was followed to prepare compound **5f** from **4g** (15.9 mg, 0.056 mmol, 1.0 equiv.) and 1-azido-2-(2-(2-fluoroethoxy)ethoxy)ethane[1] (10.0 mg, 0.056 mmol, 1.0 equiv.). The reaction was stirred at r.t. for 60 min, then extracted with DCM (3🞨10 mL) and washed with brine. The combined organic extracts were dried with anhydrous Na2SO4, filtered, and concentrated under reduced pressure and the residue was purified by silica gel column chromatography (DCM:MeOH = 30:1 to 15:1) as a red solid (21.8 mg, 84% yield). **1H NMR** (**400 MHz**, **CDCl3**) δ 8.81 (s, 1H), 8.70 (d, *J* = 8.5 Hz, 2H), 8.21 (d, *J* = 8.5 Hz, 2H), 4.74 (t, *J* = 4.8 Hz, 2H), 4.67–4.62 (m, 1H), 4.55–4.51 (m, 1H), 3.99 (t, *J* = 4.9 Hz, 2H), 3.80–3.76 (m, 1H), 3.72–3.67 (m, 5H), 1.64 (s, 9H).**13C NMR** (**101 MHz**, **CDCl3**) δ 165.1, 164.0, 160.2, 141.8, 135.8, 135.3, 130.3, 128.0, 127.6, 83.2 (d, *J* = 169.6 Hz), 81.9, 70.8 (d, *J* = 9.8 Hz), 70.7, 70.5, 69.2, 50.9, 28.3. **19F NMR** (**377 MHz**, **CDCl3**)δ 18.6. HRMS (DART-TOF) calculated for C21H26F2N7NaO4+ [M + Na]+ m/z 482.1923, found 482. 1923.milog *P* = 2.62.

The general procedure was followed to prepare compound **5g**from **4b** (8.6 mg, 0.04 mmol, 1.0 equiv.) and 3-(2-(2-(2-azidoethoxy)ethoxy)ethoxy)propanoic acid (10.0 mg, 0.04 mmol, 1.0 equiv.). The reaction was stirred at r.t. for 2 h, then extracted with DCM (3🞨10 mL) and washed with brine. The combined organic extracts were dried with anhydrous Na2SO4, filtered, and concentrated under reduced pressure and the residue was purified by silica gel column chromatography (DCM:MeOH = 15:1 to 10:1) as a red solid (15.9 mg, 85% yield). **1H NMR** (**400 MHz**, **CDCl3**) δ 8.77 (s, 1H), 8.59 (d, *J* = 9.0 Hz, 2H), 7.09 (d, *J* = 9.0 Hz, 2H), 4.75–4.71 (m, 2H), 3.99–3.96 (m, 2H), 3.92 (s, 3H), 3.77 (t, *J* = 6.1 Hz, 2H), 3.68–3.63 (m, 8H), 2.63 (t, *J* = 6.1 Hz, 2H). **13C NMR** (**101 MHz**, **CDCl3**) δ 174.7, 164.1, 163.7, 159.5, 142.0, 130.2, 127.1, 124.2, 114.9, 70.8, 70.7, 70.6, 70.5, 69.3, 66.5, 55.7, 50.9, 34.9. HRMS (DART-TOF) calculated for C20H25N7NaO6+ [M + Na]+ m/z 482.1759, found 482.1760. milog *P* = 0.34.

The general procedure was followed to prepare compound **5h** from **4m** (15.4 mg, 0.08 mmol, 1.0 equiv.) and 3-(2-Azidoethyl)-3-methyl-3H-diazirine (10.0 mg, 0.08 mmol, 1.0 equiv.). The reaction was stirred at r.t. for 20 min (HPLC yield: 96%), then extracted with DCM (3🞨10 mL) and washed with brine. The combined organic extracts were dried with anhydrous Na2SO4, filtered, and concentrated under reduced pressure and the residue was purified by silica gel column chromatography (DCM:EA = 10:1 to 3:1) as a red solid (23.1 mg, 91% yield). **1H NMR** (**400 MHz**, **CDCl3**) δ 8.59 (s, 1H), 4.43 (t, *J* = 7.1 Hz, 2H), 3.70 (t, *J* = 7.1 Hz, 2H), 3.68 (s, 3H), 3.09 (t, *J* = 7.0 Hz, 2H), 2.12 (t, *J* = 7.0 Hz, 2H), 1.03 (s, 3H).**13C NMR** (**101 MHz**, **CDCl3**) δ 172.5, 169.2, 160.3, 142.1, 126.2, 52.1, 45.7, 35.3, 30.8, 30.0, 23.6, 19.8. HRMS (DART-TOF) calculated for C12H16N9O2+ [M + H]+ m/z 318.1421, found 318.1427.


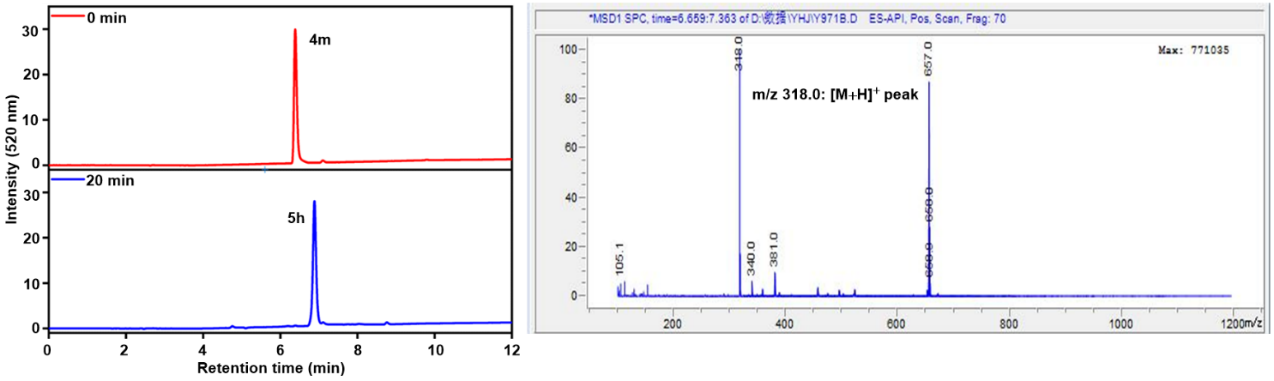


Figure S8. HPLC elution profiles of reaction products 5h (blue) and 4m (red) and the mass spectrum of the reaction solution after 20 min. HPLC was conducted with mobile phase of H2O containing 0.1% formic acid and MeCN flowing at 1 mL/min. The gradient was as follows: 0–7 min, linear increase from 30% to 100% MeCN; 7–10 min, isocratic at 100% MeCN; 10–10.5 min, linear decrease from 100% to 30% MeCN; 10.5–12 min, isocratic at 30% MeCN.

The general procedure was followed to prepare compound **5i** from **4f** (18.0 mg, 0.1 mmol, 1.0 equiv.) and 1,2-bis((2-azidoethyl)thio)ethane (10.0 mg, 0.05 mmol, 0.5 equiv.). The reaction was stirred at r.t. for 7 h, then diluted with water (10 mL), centrifuged (9000 g, 5 min), poured supernatant, added DCM (10 mL), shaken, centrifuged (9000 g, 5 min), poured supernatant, added DMSO (5 mL), filtered, lyophilized in freeze dryer to afford a red solid (18.7 mg, 67% yield). **1H NMR** (**400 MHz**, **DMSO**) δ 9.20 (s, 2H), 8.27 (dd, *J* = 3.8, 1.2 Hz, 2H), 8.07 (dd, *J* = 5.0, 1.2 Hz, 2H), 7.39 (dd, *J* = 5.0, 3.7 Hz, 2H), 4.86 (t, *J* = 6.5 Hz, 4H), 3.43 (t, *J* = 6.5 Hz, 4H).**13C NMR** (**101 MHz**, **DMSO**) δ 161.4, 159.1, 141.3, 135.7, 133.6, 131.1, 129.4, 127.5, 48.7, 36.8. HRMS (DART-TOF) calculated for C20H16N14NaS4+ [M + Na]+ m/z 603.0457, found 603.0441.

The general procedure was followed to prepare compound **5j** from **4c** (12.6 mg, 0.063 mmol, 1.0 equiv.) and azido-choline (10.0 mg, 0.063 mmol, 1.0 equiv.). The reaction was stirred at r.t. for 2 h (HPLC yield: 96%), then diluted with water (10 mL), and lyophilized in freeze dryer to afford. Then, the mixture was purified by reversed phase chromatography (H2O:MeCN = 100:0 to 90:10) as a red solid (21 mg, 93% yield).**1H NMR** (**400 MHz**, **DMSO**) δ 9.35 (s, 1H), 8.67–8.56 (m, 2H), 7.55 (t, *J* = 8.8 Hz, 2H), 5.41 (s, 1H), 5.18 (s, 2H), 4.11 (s, 2H), 3.90 (s, 2H), 3.59 (s, 2H), 3.21 (s, 6H). **13C NMR** (**101 MHz**, **DMSO**) δ 165.0 (d, *J* = 252.5 Hz), 162.8, 159.3, 141.4, 130.3 (d, *J* = 9.1 Hz), 128.4 (d, *J* = 3.1 Hz), 128.2, 116.7 (d, *J* = 21.2 Hz), 65.7, 61.9, 54.9 51.3, 43.8. **19F NMR** (**377 MHz**, **DMSO**) δ -107.0. HRMS (DART-TOF) calculated for C16H20FN8O+ [M]+ m/z 359.1739, found 359.1738.

Figure S9. HPLC elution profiles of reaction products 5j (blue) and 4c (red) and the mass spectrum of the reaction solution after 20 min. HPLC was conducted with mobile phase of H2O containing 0.1% formic acid and MeCN flowing at 1 mL/min. The gradient was as follows: 0–7 min, linear increase from 30% to 100% MeCN; 7–10 min, isocratic at 100% MeCN; 10–10.5 min, linear decrease from 100% to 30% MeCN; 10.5–12 min, isocratic at 30% MeCN.

The general procedure was followed to prepare compound **5k** from **4i** (10.0 mg, 0.026 mmol, 1.0 equiv.) and 2-azidoethanol (2.3 mg, 0.026 mmol, 1.0 equiv.). The reaction was stirred at r.t. for 18 h, then diluted with water (10 mL), centrifuged (9000 g, 5 min), poured supernatant, added DCM (10 mL), shaken, centrifuged (9000 g, 5 min), poured supernatant, filtered, dired and afford the corresponding products as a red solid (10.2 mg, 83% yield). **1H NMR** (**400 MHz**, **DMSO**) δ 9.20 (s, 1H), 8.79 (d, *J* = 8.3 Hz, 2H), 8.49 (d, *J* = 8.3 Hz, 2H), 4.62 (t, *J* = 5.3 Hz, 2H), 3.91 (t, *J* = 5.3 Hz, 2H).**19F NMR** (**377 MHz**, **DMSO**) δ -153.2 to −153.3 (m, 2F), -157.3 (t, *J* = 23.2 Hz, 1F), -162.1 to −162.2 (m, 2F). HRMS (DART-TOF) calculated for C19H10F5N7NaO3+ [M + Na]+ m/z 502.0657, found 502.0652.

The general procedure was followed to prepare compound **5l** from **4i** (3.0 mg, 0.008 mmol, 1.0 equiv.) and BDP FL azide (2.9 mg, 0.008 mmol, 1.0 equiv.). The reaction was stirred at r.t. for 18 h, then diluted with water (10 mL), centrifuged (9000 g, 5 min), poured supernatant. Then, the reaction was extracted with DCM (3🞨10 mL), and washed with brine. The combined organic extracts were dried with anhydrous Na2SO4, filtered, and concentrated under reduced pressure and the residue was purified by silica gel column chromatography (DCM:MeOH = 20:1 to 15:1) as a orange solid (4.5 mg, 76% yield). **1H NMR** (**400 MHz**, **DMSO**) δ 9.30 (s, 1H), 8.78 (d, *J* = 8.6 Hz, 2H), 8.48 (d, *J* = 8.6 Hz, 2H), 8.09 (t, *J* = 5.6 Hz, 1H), 7.68 (s, 1H), 7.09 (d, *J* = 4.0 Hz, 1H), 6.36 (d, *J* = 4.0 Hz, 1H), 6.28 (s, 1H), 3.18–3.14 (m, 2H), 3.09 (d, *J* = 7.7 Hz, 2H), 2.53–2.50 (m, 4H), 2.46 (s, 3H), 2.25 (s, 3H), 2.14–2.07 (m, 2H).**19F NMR** (**377 MHz**, **DMSO**) δ -143.1 to −143.4 (m, 2F), -153.2 to −153.3 (m, 2F), -157.3 (t, *J* = 23.2 Hz, 1F), -162.1 to −162.2 (m, 2F). HRMS (DART-TOF) calculated for C34H25BF7N10O3 [M - H]- m/z 765.2104, found 765.2104.

The general procedure was followed to prepare compound **5m** from **4h** (6.2 mg, 0.028 mmol, 1.0 equiv.) and N-(2-(2-(2-azidoethoxy)ethoxy)ethyl)-5-(1,2-dithiolan-3-yl)pentanamide (10 mg, 0.028 mmol, 1.0 equiv.). The reaction was stirred at r.t. for 2 h (HPLC yield: 99%), then diluted with water (10 mL), and lyophilized in freeze dryer to afford. The reaction mixture was diluted with water (10 mL), centrifuged (9000 g, 5 min), poured supernatant, added DCM (10 mL), shaken, centrifuged (9000 g, 5 min), poured supernatant, dried and afford the corresponding products as a red solid (14.9 mg, 92% yield).**1H NMR** (**400 MHz**, **DMSO**) δ 9.19 (s, 1H), 8.64 (d, *J* = 7.9 Hz, 2H), 8.23 (d, *J* = 8.1 Hz, 2H), 7.75 (s, 1H), 4.74 (t, *J* = 5.1 Hz, 2H), 3.95 (t, *J* = 5.1 Hz, 2H), 3.62–3.46 (m, 9H), 3.17–3.11 (m, 2H), 2.00 (t, *J* = 7.3 Hz, 2H), 1.88–1.79 (m, 1H), 1.69–1.53 (m, 2H), 1.49–1.40 (m, 3H), 1.33–1.26 (m, 2H). HRMS (DART-TOF) calculated for C25H32N8NaO5S2+ [M + Na]+ m/z 611.1829, found 611.1824.

Figure S10. HPLC elution profiles of reaction products 5m (blue) and 4h (red) and the mass spectrum of the reaction solution after 20 min. HPLC was conducted with mobile phase of H2O containing 0.1% formic acid and MeCN flowing at 1 mL/min. The gradient was as follows: 0–7 min, linear increase from 30% to 100% MeCN; 7–10 min, isocratic at 100% MeCN; 10–10.5 min, linear decrease from 100% to 30% MeCN; 10.5–12 min, isocratic at 30% MeCN.

The general procedure was followed to prepare compound **5n** from **4o** (8.1 mg, 0.025 mmol, 1.0 equiv.) and N-(2-(2-(2-azidoethoxy)ethoxy)ethyl)-5-((3aS,4S,6aR)-2-oxohexahydro-1H-thieno[3,4-d]imidazol-4-yl)pentanamide (10.0 mg, 0.025 mmol, 1.0 equiv.). The reaction was stirred at r.t. for 2 h (HPLC yield: 92%), then extracted with DCM (3🞨10 mL) and washed with brine. The combined organic extracts were dried with anhydrous Na2SO4, filtered, and concentrated under reduced pressure and the residue was purified by silica gel column chromatography (DCM:MeOH = 20:1 to 10:1) as a red solid (15.7 mg, 87% yield).**1H NMR** (**400 MHz**, **CDCl3**) δ 8.78 (s, 1H), 7.24–7.17 (m, 3H), 7.12–7.06 (m, 2H), 6.55 (t, *J* = 5.7 Hz, 1H), 6.25 (s, 1H), 5.79 (d, *J* = 8.3 Hz, 1H), 5.66 (d, *J* = 7.8 Hz, 1H), 5.40 (s, 1H), 4.75–4.71 (m, 2H), 4.47 (dd, *J* = 7.8, 4.9 Hz, 1H), 4.32–4.27 (m, 1H), 3.97 (t, *J* = 4.9 Hz, 2H), 3.64 (q, *J* = 2.6, 1.9 Hz, 2H), 3.60–3.56 (m, 2H), 3.52 (t, *J* = 5.2 Hz, 2H), 3.45–3.32 (m, 4H), 3.15–3.10 (m, 1H), 2.88 (dd, *J* = 12.8, 4.9 Hz, 1H), 2.70 (d, *J* = 12.8 Hz, 1H), 2.19 (t, *J* = 7.4 Hz, 2H), 1.76–1.70 (m, 1H), 1.68–1.58 (m, 3H), 1.45–1.41 (m, 2H), 1.38 (s, 9H).**13C NMR** (**101 MHz**, **CDCl3**) δ 173.5, 169.6, 163.9, 160.7, 155.4, 141.6, 135.7, 129.5, 128.8, 127.7, 127.3, 80.4, 70.5, 70.2, 69.1, 61.9, 60.3, 55.6, 50.8, 41.3, 40.7, 39.3, 36.0, 28.4, 28.3, 28.2, 25.6. HRMS (DART-TOF) calculated for C33H47N11NaO6S+ [M + Na]+ m/z 748.3324, found 748.3334.

Figure S11. HPLC elution profiles of reaction products 5n (blue) and 4o (red) and the mass spectrum of the reaction solution after 20 min. HPLC was conducted with mobile phase of H2O containing 0.1% formic acid and MeCN flowing at 1 mL/min. The gradient was as follows: 0–7 min, linear increase from 30% to 100% MeCN; 7–10 min, isocratic at 100% MeCN; 10–10.5 min, linear decrease from 100% to 30% MeCN; 10.5–12 min, isocratic at 30% MeCN.

# 4. Protein dual-labeling using triazolyl-tetrazine bioorthogonal probe

Stock solutions of Tetrazine-BODIPY (**5l**) (5 mM in DMSO), bovine serum albumin (BSA ) (0.4 mM in PBS, pH 7.4) and **TCO-Cy5** (10 mM in DMSO) were prepared. Tetrazine-BODIPY (**5l**) (10 μL) was added to the solution of BSA (10 μL) in PBS (130 μL, pH 7.4) and DMSO (50 μL). The mixture was allowed to sit at 4 °C for 12 h. Two Zeba spin desalting columns (7kDa, 0.5 m, Thermo Scientific) was centrifuged at 1000 g for 1 min. Then, 200 μL of PBS (pH 7.4) was added followed by centrifugation at 1000 g for 1 min and the process was repeated. Protein reaction solution (100 μL) and PBS (30 μL) were added to a Zeba spin desalting column followed by centrifugation at 1500 g for 2 min to remove the excess **5l**. TCO-Cy5 (0.5 μL) was then added to 50 μL of the solution and the mixture was set at 37 °C for 1 h. Then, the reaction solution and PBS (30 μL) were added to another Zeba spin desalting column followed by centrifugation at 1500 g for 2 min to remove the excess TCO-Cy5. Finally, the protein content was quantified by ultraviolet spectrophotometer and the product was analyzed by sodium dodecyl sulfate-polyacrylamide gel electrophoresis (SDS–PAGE).

**Figure S12.** Protein dual-labeling using triazolyl-tetrazine bioorthogonal probe. **A**) Schematic diagram of labeling protein. **B**) Coomassie staining and fluorescence imaging of SDS-PAGE gels of the BSA conjugate at 488 nm and at 650 nm. Gel analysis of BSA (40.0 µM, 7.0 µL), BSA + TCO-Cy5 (21.8 µM, 12.8 µL), BSA-BDP (32.4 µM, 8.6 µL) or BSA-BDP + TCO-Cy5 (14.5 µM, 19.3 µL).

5. Stability and bioorthogonal reaction kinetics

*5.1 Stability test*

Solutions of tetrazine compounds in DMSO (20 mM, 10 µL) were diluted in a mixture of DMEM (no phenol red) supplemented with 10% FBS (final concentration: 500 µM for 5b, Py-Tz, Me-Tz and H-Tz, and 200 µM for Ph-Tz) and incubated at 37 °C. At selected time points (0, 3, 9, 12, 24 and 48 h), the samples (30 µL) were treated with an volume of MeCN (60 µL) to precipitate serum proteins. After centrifugation at 15000 g for 3 min, the supernatant was collected and used for further analysis. The peak area of tetrazine compounds at 520 nm was monitored by LC-MS. The stability of the compounds were determined by the decrease of peak area at 520 nm (the peak area at 0 min was defined as 100%). Each stability test was performed in triplicate. The stability of tetrazine probes in FBS was measured by the same method.

**Table S2.** Stability of tetrazine probes in DMEM (10% FBS)

|  | **5b** | **Py-Tz** | **Ph-Tz** | **Me-Tz** | **H-Tz** |
| --- | --- | --- | --- | --- | --- |
| 0 h | 100% | 100% | 100% | 100% | 100% |
| 3 h | 98% | 97% | 100% | 99% | 68% |
| 9 h | 96% | 88% | 98% | 96% | 32% |
| 12 h | 92% | 80% | 97% | 95% | 22% |
| 24 h | 84% | 60% | 96% | 91% | 1% |
| 48 h | 63% | 13% | 97% | 83% | / |

**Table S3.** Stability of tetrazine probes in FBS

|  | **5b** | **Py-Tz** | **Ph-Tz** | **Me-Tz** | **H-Tz** |
| --- | --- | --- | --- | --- | --- |
| 0 h | 100% | 100% | 100% | 100% | 100% |
| 3 h | 99% | 96% | 100% | 98% | 82% |
| 9 h | 95% | 90% | 100% | 97% | 58% |
| 12 h | 91% | 82% | 100% | 94% | 48% |
| 24 h | 84% | 65% | 99% | 90% | 23% |
| 48 h | 65% | 38% | 99% | 84% | / |

Figure S13. Stability of tetrazine probes in DMEM (A) and FBS (B) after 12 h, 24 h, and 48 h.

*5.2 Bioorthogonal reaction kinetics*

The second-order rate constants of the bioorthogonal reactions between tetrazine derivatives (final concentration: 0.1 mM) and TCO (final concentration: 0.1 mM) in buffer at 25 °C were determined by UV-Vis spectroscopy under second-order conditions by evaluating the changes in the absorption intensity over time at 520 nm . Measurements started immediately after the addition of TCO. The second-order rate constant *k*2 was calculated from the slope of the plot of 1/*c*−1/*c*0 against time. Each experiment was performed in triplicate, and data were analyzed using GraphPad Prism 6.0. Results are shown as mean ± standard deviation.

Figure S14. Kinetics plots of the reaction between tetrazine (100 μM) and TCO in MeCN/PBS (1:1) at 25 °C.

Solutions (5 mL) of tetrazine 5b (80 μM) was prepared in PBS. Solutions (5 mL) of d-TCO (1.0 mM) were prepared in PBS. The reaction between tetrazine and d-TCO was measured under stopped-flow spectrophotometer (Applied Photophysics Ltd., UK). Tetrazine and d-TCO were injected in equal volumes via 5 mL syringes into the stopped-flow instrument at 23 °C, resulting in final concentration of 0.04 mM of tetrazines and 0.50 mM d-TCO. The reaction was monitored by the decay of absorbance associated with the tetrazine at 310 nm. Reaction were repeated in triplicate. With Prism software, an observed rate constant (*k*obs = 19.703 ± 0.081 s−1) was obtained by nonlinear regression. The mean second-order rate constant *k*2 was calculated as 39406 ± 162 M−1s−1.

Figure S15. Kinetics plots of the reaction between 5b (80 μM) and d-TCO (1.0 mM) in PBS at 23 °C. The *k2* was determined at 39406 ± 162 M−1 s−1.

6. Radiosynthesis of 18F-labeled triazolyl-tetrazines

*6.1 General information of radiosynthesis*

The synthesized 19F standard was used to confirm the identity of the 18F-labeled compound *via* HPLC. An aliquot of the reaction mixture was collected for analysis by radio HPLC on an Agilent ZORBAX SB-C18 column (5 μm, 4.6🞨250 mm) using H2O/MeCN mixture as eluent. HPLC gradient A was used for 18F-N3 and18F-5d, HPLC gradient B was used for18F-5e, HPLC gradient C was used for 18F-5f. The radiochemical conversion (RCC) refers to HPLC yields and was calculated by crude radio-HPLC traces of the reaction mixture.

The 18F-labeled compounds were purified on semi-preparative HPLC system equipped with an Agilent ZORBAX SB-C18 column (5 μm, 9.4🞨250 mm) column using H2O/MeCN mixture as eluent. HPLC gradient D was used for 18F-N3, 18F-5d and 18F-5e, HPLC gradient E was used for 18F-5f. All radiochemical yields (RCY) are decay-corrected and refer to isolated yields. The radiochemical purity (RCP) of isolated 18F-labeled compound was measured *via* radio HPLC. Molar activity (the measured radioactivity per mole of compound) was calculated using a standard curve of the corresponding 19F standard. The 19F standard curve was created from the UV HPLC trace of standard solution. An aliquot of purified 18F-labeled compound was collected for analysis by radio HPLC; the UV area overlapping with radio peak was then recorded. The standard curve was used to calculate the mass and mole number. Dividing the product activity by the mole number gives the molar activity in Ci/mmol. The total synthesis time refers to the time from the beginning of the reaction between ethynyl-tetrazine 4 and 18F-N3 to obtaining the isolated target 18F-labeled product 18F-5.

Analytical HPLC gradient A: 0–9 min, linear increase from 30% to 100% MeCN; 9–12 min, isocratic at 100% MeCN; 12–13 min, linear decrease from 100% to 30% MeCN.

Analytical HPLC gradient B: 0–9 min, linear increase from 20% to 100% MeCN; 9–12 min, isocratic at 100% MeCN; 12–13 min, linear decrease from 100% to 20% MeCN.

Analytical HPLC gradient C: 0–9 min, linear increase from 60% to 100% MeCN; 9–12 min, isocratic at 100% MeCN; 12–13 min, linear decrease from 100% to 60% MeCN.

Analytical HPLC gradient D: isocratic at 30% MeCN.

Analytical HPLC gradient E: isocratic at 40% MeCN.

*6.2 General procedure for preparation of 18F-labeled triazolyl-tetrazines*

The compound **18F-N3** was synthesized through the literature.[1,9] [18F]fluoride was produced in a 10 MeV cyclotron (Sumitomo Heavy Industries, Japan) and trapped in a pre-activated QMA cartidge (Waters, USA) before use. The radioactivity was eluted with 1.0 mL K222/K2CO3 solution (33 mg K2CO3, 390 mg K222, 24 mL MeCN, 6 mL water) into a V-vial containing a magnetic stirring bar. The solvent was evaporated by azeotropic drying at 100 °C under N2 atmosphere for 5 min. The evaporation process was repeated three times with the addition of 1.0 mL of dry acetonitrile each time. To the dried residue containing [18F]KF, precursor azide (6.6 mg, 20 µmol) in dry MeCN (400 µL) was added. The mixture was heated at 80 °C for 30 min. Diluted with MeCN/H2O (1:1, v/v; 2 mL), the crude product was purified on semi-preparative HPLC system equipped with an Agilent ZORBAX SB-C18 column (5 μm, 9.4🞨250 mm) column using H2O/MeCN mixture (70/30 v/v) as eluent (5 mL/min). The retention time for **18F-N3** was about 7 min and the HPLC fraction was collected, diluted, and trapped on a Sep-Pak C18 plus light cartridge (Wasters, USA), which was eluted with 0.5 mL of EtOH. An aliquot was collected for analysis by radio HPLC on an Agilent ZORBAX SB-C18 column (5 μm, 4.6🞨250 mm) using Gradient A. For all gradients, the mobile phase was H2O/MeCN flowing at 1 mL/min. The solvent was removed by heating and a stream of nitrogen to afford **18F-N3** (30 mCi, RCY of 60%, RCP of >99%) for the next step.

The following click reactions were performed as follows: A mixture of ethynyl-tetrazine **4** (0.02 mmol), sodium ascorbate (0.79 mg, 0.004 mmol), THPTA (0.87 mg, 0.002 mmol) and CuSO4 (0.32 mg, 0.002 mmol) in 0.4 mL of DMF/H2O (4:1, v/v) was added to the isolated **18F-N3** *via* a syringe. The sealed vial was then reacted at 35 °C for 30 min. Then, the mixture was diluted with MeCN:H2O (1:1, v/v; 1.5 mL) and purified by semi-preparative HPLC using water/MeCN mixture (70:30 or 60:40, v/v) as eluent. The collected HPLC fraction was trapped on a Sep-Pak C18 plus light cartridge, which was eluted with EtOH. An aliquot was collected for calculating radiochemical conversion (RCC) by radio-HPLC with an Agilent ZORBAX SB-C18 column (5 μm, 4.6🞨250 mm). For all gradients, the mobile phase was H2O/MeCN flowing at 1 mL/min.

**Table S4.** Radiosynthesis of **18F-5d**.

| Entry | Activity  (**18F-N3**) | Radioactivity collected | Decay-corrected radioactivity | Total synthesis time | RCC  (HPLC yield) | RCY  (Isolated yield) |
| --- | --- | --- | --- | --- | --- | --- |
| 1 | 4.1 mCi | 2.4 mCi | 3.59 mCi | 64 min | 95% | 88% |
| 2 | 2.0 mCi | 1.0 mCi | 1.77 mCi | 90 min | 86% | 88% |
| 3 | 1.1 mCi | 0.65 mCi | 0.96 mCi | 62 min | 92% | 87% |
| 4 | 4.4 mCi | 2.5 mCi | 3.3 mCi | 46 min | 82% | 76% |
| 5 | 2.9 mCi | 1.6 mCi | 2.3 mCi | 58 min | 87% | 80% |
| Average RCY of **18F-5d** from **18F-N3**: 84 ± 5% (the number of replicates, n= 5). Total synthesis time: 64 ± 16 min (the number of replicates, n= 5). RCP: >99%. | | | | | | |

**Figure S16.** Radio-HPLC trace chromatogram of **18F-5d** after semi-preparative HPLC purification with identical retention time of reference **5d**.

**Table S5.** Radiosynthesis of **18F-5e**.

| Entry | Activity  (**18F-N3**) | Radioactivity collected | Decay-corrected radioactivity | Total synthesis time | RCC  (HPLC yield) | RCY  (Isolated yield) |
| --- | --- | --- | --- | --- | --- | --- |
| 1 | 7.2 mCi | 3.9 mCi | 5.2 mCi | 46 min | 91% | 72% |
| 2. | 600 μCi | 380 μCi | 518 μCi | 49 min | 93% | 86% |
| 3 | 1.5 mCi | 716 μCi | 1.1 mCi | 68 min | 95% | 76% |
| Average RCY**18F-5e** from **18F-N3**: 78 ± 6% (the number of replicates, n = 3). Total synthesis time: 54 ± 12 min (the number of replicates, n = 3). RCP: >99%. | | | | | | |

**Figure 17.** Radio-HPLC trace chromatogram of **18F-5e** after semi-preparative HPLC purification with identical retention time of reference **5e**.

**Table S6.** Radiosynthesis of **18F-5f**.

| Entry | Activity  (**18F-N3**) | Radioactivity collected | Decay-corrected radioactivity | Total synthesis time | RCC  (HPLC yield) | RCY  (Isolated yield) |
| --- | --- | --- | --- | --- | --- | --- |
| 1 | 7.2 mCi | 2.7 mCi | 4.1 mCi | 67 min | 63% | 57% |
| 2 | 1.1 mCi | 537 μCi | 809 μCi | 65 min | 91% | 74% |
| 3 | 1.4 mCi | 510 μCi | 861 μCi | 83 min | 92% | 62% |
| Average RCY**18F-5f** from **18F-N3**: 64 ± 9% (the number of replicates, n = 3) Total synthesis time: 72 ± 10 min (the number of replicates, n = 3). RCP: >99%. Molar activity: 20.35 GBq/μmol. | | | | | | |

**Figure 18.** Radio-HPLC trace chromatogram of **18F-5f** after semi-preparative HPLC purification with identical retention time of reference **5f**.

*6.3 In vitro stability of 18F-5f*

A solution of **18F-5f** in ethanol (0.3 mCi, 50 µL) was added to a solution of DMEM (500 µL) supplemented with 10% FBS and incubated at 25 °C for 120 min. An aliquot (100 µL) was treated with MeCN (200 µL) to precipitate serum proteins, centrifugated at 5000 g for 15 min, and the supernatant was collected for analysis by radio HPLC. Another aliquot (100 µL) was added a solution of d-TCO in DMSO (10 mM, 0.1 µL), maintained at 25 °C for 1 min, treated with MeCN (200 µL) to precipitate serum proteins, centrifugated at 5000 g for 15 min, and the supernatant was collected for analysis by radio HPLC. Radio HPLC analysis revealed that **18F-5f** and the IEDDA pruduct between **18F-5f** and d-TCO were obtained in >99% radiochemical purity.

**Figure S19.** *In vitro* stability of **18F-5f** in DMEM (10% FBS).Compound **18F-5f** was incubated in DMEM (10% FBS) at 25 °C for 120 min. An aliquot was collected for analysis by radio HPLC and another aliquot was treated with d-TCO and then analyzed by radio HPLC.

*6.4* *In vivo PET imaging*

Male ICR (Institute of Cancer Research) mice (6-8 weeks old, 27.8 ± 1.2 g) were purchased from Chengdu DOSSY experimental animals Co., LTD (Chengdu, China). All animal experiments were approved by the Committee for Animal Care and Use and the Ethics Committee of West China Hospital, Sichuan University (20221229001). An Micro-PET/CT scanner (Inviscan, France) was used to perform micro-PET dynamic imaging of male ICR mice. Animals were anesthetized under 2.0% isoflurane and randomly divided into two groups. In the first group (n = 3), ICR mice were intravenously injected with 103.2 μCi, 67.6 μCi and 108.1 μCi of **18F-5d** in 125 μL of saline (10% EtOH), respectively. In the second group (n = 3), ICR mice were intravenously injected with91.9 μCi, 73.0 μCi and 52.7 μCi of **18F-5f** in 125 μL of saline (10% EtOH), respectively. Mice were placed in a prone position in a small animal PET scanner. The dynamic micro-PET scans were then performed for 55 min in tabular mode. All required PET data were reconstructed with a 3D-OSEM algorithm using a a Monte-Carlo based model, and then handle by osirix software (USA). The regions of interest of major organs were directly drawn in fused dynamic PET/CT images for brain, kidney, bone, muscle, heart, lung and liver. The percentage-injected dose per gram (%ID/g) was calculated and the results were reported as mean ± SD averaged over n (n = 3) mice. The representive PET images were obtained at 5.5 min and 55 min and presented in Fig. S20A, respectively. Activities in major organs were also directly obtained from dynamic PET images, and decay-corrected and presented as %ID/g in time-activity curves showed in Fig. S20B.

**Figure S20.** *In vivo* PET imaging of **18F-5d** and **18F-5f**. **A**) PET imagings of **18F-5d** and **18F-5f** in male SPFICR mice at 5 min and 55 min after injection. **B**) Mean organ time–activity curves obtained in ICR mice (n = 3).

# 7. Computational analysis

*7.1 Computational methods*

Theoretical calculations were performed using Gaussian 09 program suite.[10] Geometry optimizations of minima and transition structures, and frequency analyses were carried out at M06-2X level of theory[11] with the 6-31G(d) basis set. A quasi-harmonic correction to entropy was applied by setting all frequencies which are below 100 cm-1 to 100 cm-1.[12,13] The single-point energies and solvent effects in water were evaluated at M06-2X/6-311+G(d,p) level with the CPCM model. [14] The computed activation free energy was further corrected by using the equation [Δ*G*≠corr = (Δ*G*≠compt + 8.4)/1.6].[15] The frontier molecular orbitals (FMOs) and their energies were computed at the HF/6-311+G(d,p)//M06-2X/6-31G(d) level of theory. Distortion/interaction analyses were conducted according to the reference.[15]

*7.2 Coordinates and energies of stationary points*

*G*(water) = -946.725282 Hartree

| C | -0.130229 | 0.011920 | -0.000091 |
| --- | --- | --- | --- |
| C | 2.442603 | 0.000882 | -0.000049 |
| C | -1.608535 | 0.018035 | -0.000059 |
| C | -2.311743 | -1.191553 | -0.000144 |
| C | -3.690157 | 1.234334 | 0.000095 |
| C | -3.699706 | -1.187121 | -0.000126 |
| H | -1.761110 | -2.125256 | -0.000231 |
| C | -4.389466 | 0.026582 | -0.000004 |
| H | -4.252094 | 2.162487 | 0.000201 |
| H | -4.252534 | -2.119855 | -0.000223 |
| C | 3.918342. | 0.005434 | -0.000003 |
| C | 4.624201 | 1.202521 | 0.000018 |
| C | 6.013573 | 1.192051 | 0.000057 |
| H | 4.075232 | 2.137550 | 0.000002 |
| C | 6.002940 | -1.221303 | 0.000054 |
| C | 6.704871 | -0.017679 | 0.000075 |
| H | 6.558679 | 2.130579 | 0.000070 |
| H | 6.539751. | -2.164619 | 0.000068 |
| H | 7.790578 | -0.022463 | 0.000105 |
| N | 0.498314 | -1.173820 | -0.000029 |
| N | 1.801651 | -1.180097 | -0.000012 |
| N | 1.811734 | 1.187341 | -0.000050 |
| N | 0.508422 | 1.192335 | -0.000070 |
| C | 4.613559 | -1.219496 | 0.000017 |
| H | 4.056499 | -2.149686 | -0.000001 |
| C | -2.303407 | 1.233075 | 0.000057 |
| H | -1.747096 | 2.163390 | 0.000106 |
| C | -5.877415 | 0.087034 | 0.000027 |
| O | -6.522311 | 1.107218 | -0.000134 |
| O | -6.451806 | -1.131745 | 0.000278 |
| H | -7.412405 | -0.979317 | 0.000336 |

*G*(water) = -956.768071 Hartree

| C | 2.733003 | -0.034026 | -0.001190 |
| --- | --- | --- | --- |
| C | 0.173239 | -0.020239 | -0.002425 |
| C | -1.305005 | -0.019584 | -0.001929 |
| C | -2.004400 | 1.192005 | -0.001839 |
| C | -3.392450 | 1.191738 | -0.000870 |
| H | -1.451892 | 2.124531 | -0.002538 |
| C | -3.390011 | -1.229788 | -0.000152 |
| C | -4.085695 | -0.020140 | 0.000073 |
| H | -3.943158 | 2.125850 | -0.000463 |
| H | -3.954336 | -2.156289 | 0.000735 |
| N | 2.107213 | -1.220374 | -0.002240 |
| N | 0.802543 | -1.206343 | -0.002848 |
| N | 0.808687 | 1.162729. | -0.002014 |
| N | 2.112427 | 1.156270 | -0.001393 |
| C | -2.003430 | -1.232966 | -0.001194 |
| H | -1.449361 | -2.164794 | -0.001537 |
| C | 4.191405 | -0.001209 | 0.000361 |
| C | 5.001048 | 1.114038 | 0.001379 |
| N | 6.239362 | 0.591258 | 0.002838 |
| H | 4.785459 | 2.170190. | 0.001254 |
| N | 6.215295- | -0.752942. | 0.002717 |
| N | 4.979456 | -1.114615 | 0.001339 |
| H | 7.131741. | 1.065643. | 0.004008 |
| C | -5.573866 | -0.077726 | 0.001808 |
| O | -6.146224 | 1.141990 | 0.002124 |
| H | -7.107101 | 0.991162 | 0.003566 |
| O | -6.219933 | -1.097089 | 0.003134 |

*G*(water) = -962.776213 Hartree

| C | -2.447341 | -0.022475 | -0.000027 |
| --- | --- | --- | --- |
| C | 0.118347 | -0.015672 | -0.000075 |
| C | -3.935167 | -0.001285 | -0.000002 |
| C | -4.614036 | 1.219935 | 0.000146 |
| C | -5.879186 | -1.189070 | -0.000126 |
| C | -6.003654 | 1.197645 | 0.000159 |
| H | -4.056019 | 2.148344 | 0.000238 |
| C | -6.654941 | -0.029727 | 0.000026 |
| H | -6.352109 | -2.168591 | -0.000255 |
| H | -6.566643 | 2.1257 34 | 0.000270 |
| H | -7.737599 | -0.095632 | 0.000030 |
| C | 1.596619 | -0.018819 | -0.000046 |
| C | 2.292510 | -1.233290 | 0.000097 |
| C | 3.679317 | -1.232706 | 0.000125 |
| H | 1.736743 | -2.163898 | 0.000172 |
| C | 3.685927 | 1.189111 | -0.000150 |
| C | 4.376872 | -0.024010 | -0.000003 |
| H | 4.242379 | -2.160154 | 0.000245 |
| H | 4.237893 | 2.122343 | -0.000269 |
| N | -1.818461 | 1.160418 | -0.000025 |
| N | -0.513176 | 1.166864 | -0.000036 |
| N | -0.515353 | -1.200497 | 0.000031 |
| N | -1.819079 | -1.209389 | 0.000057 |
| N | -4.549992. | -1.186681 | -0.000139 |
| C | 2.297981 | 1.191823 | -0.000164 |
| H | 1.746073 | 2.124803 | -0.000271 |
| C | 5.865097 | -0.082788 | 0.000018 |
| O | 6.510963 | -1.102258 | -0.000024 |
| O | 6.438129. | 1.1 36616 | 0.000101 |
| H | 7.398893 | 0.985157 | 0.000141 |

*G*(water) = -312.998444 Hartree

| C | -0.413966 | -0.522065 | -1.358397 |
| --- | --- | --- | --- |
| H | -1.490184 | -0.336794. | -1.334889 |
| C | 0.413966 | 0.522065 | -1.358397 |
| H | 1.490184 | 0.336794 | -1.334889 |
| C | 0.034981 | -1.871510 | -0.901221 |
| H | -0.510280 | -2.704358 | -1.358222 |
| H | 1.102540 | -2.008137 | -1.112700 |
| C | -0.034981 | 1.871510 | -0.901221 |
| H | -1.102540 | 2.008137 | -1.112700 |
| H | 0.510280 | 2.704358 | -1.358222 |
| C | 0.183001 | 1.877834 | 0.635533 |
| H | 1.260794 | 1.924503 | 0.841500 |
| H | -0.248046 | 2.798155 | 1.04827 8 |
| C | -0.413966 | 0.660993 | 1.3761 89 |
| H | -0.560669 | 0.965017 | 2.418884 |
| H | -1.420918 | 0.465721 | 0.984525 |
| C | -0.183001 | 1.877834 | 0.635533 |
| H | 0.248046 | -2.798155 | 1.048278 |
| H | -1.260794 | -1.924503 | 0.841500 |
| C | 0.413966 | -0.660993 | 1.376189 |
| H | 0.560669 | -0.965017 | 2.418884 |
| H | 1.420918 | -0.465721 | 0.984525 |

MeSH

*G*(water) = -438.656116 Hartree

| C | 1.155518 | 0.018802 | 0.000589 |
| --- | --- | --- | --- |
| H | 1.523763 | -1.005280 | -0.073972 |
| H | 1.529379 | 0.458386 | 0.926057 |
| H | 1.520677 | 0.582671 | -0.858492 |
| S | -0.663354 | -0.086550 | 0.000106 |
| H | -0.893261 | 1.236215 | 0.001169 |

MeSSMe

*G*(water) = -876.122415Hartree

| C | 1.802923 | 0.813826 | -0.387497 |
| --- | --- | --- | --- |
| H | 2.799213 | 0.863745 | 0.059547 |
| H | 1.307224 | 1.777909- | -0.258681 |
| H | 1.891912 | 0.576977 | -1.448222 |
| S | 0.907245 | -0.506463 | 0.489207 |
| S | -0.907480 | -0.506318 | -0.489253 |
| C | -1.802636 | 0.813993 | 0.387467 |
| H | -1.309104 | 1.778579 | 0.254812 |
| H | -2.800831- | 0.861161 | -0.055760 |
| H | -1.886370 | 0.579213 | 1.449227 |

*G*(water) = -947.926442Hartree

| C | -2.450294 | -0.055201 | -0.510198 |
| --- | --- | --- | --- |
| C | 0.150840 | 0.134451 | -0.682084 |
| C | -3.836425 | -0.017508 | 0.003493 |
| C | -4.335707 | 1.097448 | 0.681037 |
| C | -5.969455 | -1.118895 | 0.276397 |
| C | -5.645828 | 1.103927 | 1.150506 |
| H | -3.697694 | 1.954528 | 0.879939 |
| C | -6.465815 | -0.001344 | 0.946120 |
| H | -6.606211 | -1.983077 | 0.114236 |
| H | -6.02199 1 | 1.972485 | 1.681877 |
| H | -7.489009 | 0.006272 | 1.308622 |
| C | 1.593145 | 0.048874 | 0.366274 |
| C | 2.173351 | -1.141909 | 0.082456 |
| C | 3.530441 | -1.192475 | 0.370121 |
| H | 1.564692 | -2.027138 | 0.243913 |
| C | 3.744535 | 1.141071 | -0.231260 |
| C | 4.318507 | -0.053916 | 0.210353 |
| H | 3.996476 | -2.105116 | 0.726992 |
| H | 4.364616 | 2.022655 | -0.351351 |
| N | -0.472653 | 1.239554 | -0.524705 |
| C | 2.388951 | 1.189867 | -0.519057 |
| H | 1.925140 | 2.105828 | -0.868827 |
| C | -4.663137 | -1.128425 | -0.194106 |
| H | -4.262937 | -1.987516 | -0.722399 |
| H | -0.024702 | -1.857923 | -1.093422 |
| N | -0.537067 | -0.988454 | -1.162727 |
| N | -1.820144 | -1.164548 | -0.589765 |
| H | -2.312738 | 1.977102 | -0.666836 |
| N | -1.822668 | 1.130510 | -0.923855 |
| C | 5.767478 | 0.164972 | 0.529579 |
| O | 6.435824 | 0.990613 | 0.346094 |
| H | 7.361295 | 0.808965 | 0.584014 |
| O | 6.310085 | -1.172170 | 0.914919 |

*G*(water) = -957.972054Hartree

| C | -2.735346 | 0.062516 | 0.434404 |
| --- | --- | --- | --- |
| C | -0.154814 | -0.185112 | 0.604261 |
| C | 1.295197 | -0.081216 | 0.331733 |
| C | 1.906844 | 1.152378 | 0.086212 |
| C | 3.270442 | 1.219024 | -0.164802 |
| H | 1.319151 | 2.065388 | 0.056249 |
| C | 3.429637 | -1.183810 | 0.067966 |
| C | 4.034540 | 0.053047 | -0.170278 |
| H | 3.761168 | 2.166003 | -0.364094 |
| H | 4.031315 | -2.085814 | 0.062049 |
| C | 2.067311 | -1.248859 | 0.318333 |
| H | 1.578788 | -2.197965 | 0.510184 |
| C | -4.094657 | 0.095413 | -0.099584 |
| C | -4.948636 | 1. 159388 | -0.272808 |
| N | -6.053149 | 0.581884 | -0.785794 |
| H | -4.849523 | 2.214553 | -0.077313 |
| N | -5.912528 | -0.741444 | -0.924967 |
| N | -4.726258 | -1.039107 | -0.509588 |
| N | -2.106504 | 1.144666 | 0.685521 |
| N | -0.790022 | -1.243827 | 0.273883 |
| H | -2.658031 | -1.942241 | 0.195789 |
| H | -0.306231 | 1.733742 | 1.295334 |
| N | -2.148938 | -1.189154 | 0.648224 |
| N | -0.830974 | 0.871270 | 1.236592 |
| H | -6.925304 | 1.01 1394 | -1.062067 |
| C | 5.492261 | 0.182291 | -0.438290 |
| O | 6.060271 | 1.225263 | -0.655645 |
| O | 6.137137 | -1.000489 | -0.415009 |
| H | 7.071341 | -0.803632 | -0.600881 |

*G*(water) = -963.983953Hartree

| C | -2.456681 | 0.039441 | 0.528236 |
| --- | --- | --- | --- |
| C | 0.129664 | -0.193625 | 0.658271 |
| C | -3.843505 | 0.065007 | 0.005899 |
| C | -4.543183 | 1.268203 | -0.109661 |
| C | -5.604302 | -1.147206 | -0.799722 |
| C | -5.836853 | 1.224834 | -0.607193 |
| H | -4.063770 | 2.193796 | 0.187575 |
| C | -6.383521 | -0.006676 | -0.961364 |
| H | -5.994929 | -2.127642 | -1.061004 |
| H | -6.413867 | 2.138106 | -0.715479 |
| H | -7.391877 | -0.085418 | -1.352519 |
| C | 1.572991 | -0.084589 | 0.355814 |
| C | 2.350017 | -1.249047 | 0.335 106 |
| C | 3.706315 | -1.180503 | 0.055269 |
| H | 1.869445 | -2.198529 | 0.544432 |
| C | 3.532031 | 1.219624 | -0.192480 |
| C | 4.300886 | 0.056808 | -0.205517 |
| H | 4.311405 | -2.080195 | 0.043577 |
| H | 4.014620 | 2.166963 | -0.409271 |
| N | -4.357502 | -1.12 1592 | -0.327441 |
| C | 2.174345 | 1.149471 | 0.087826 |
| H | 1.582619 | 2.059981 | 0.063026 |
| N | -1.825450 | 1.126277 | 0.755564 |
| N | -0.507314 | -1.258397 | 0.354346 |
| H | -2.381781 | -1.955030 | 0.311947 |
| H | -0.021651 | 1.735455 | 1.326962 |
| N | -1.859045 | -1.203309 | 0.751034 |
| N | -0.542661 | 0.869588. | 1.287222 |
| C | 5.751738 | 0.189932 | -0.505900 |
| O | 6.401800 | -0.990308 | -0.489482 |
| H | 7.330669 | -0.790709 | -0.697740 |
| O | 6.311108 | -1.233459 | -0.742279 |


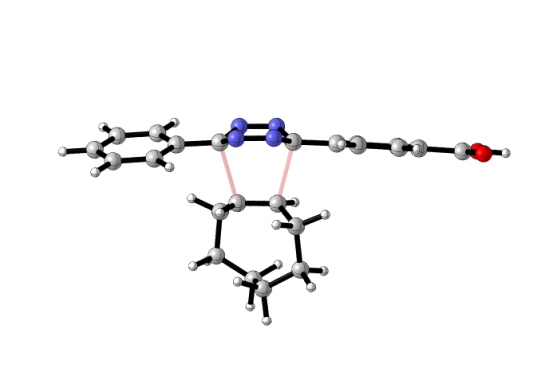


**TS-Ph-Tz-TCO**

*G*(water) = -1259.698941Hartree

| C | -0.509277 | -1.103851 | 0.019498 |
| --- | --- | --- | --- |
| C | 1.989568 | -1.236457 | 0.041009 |
| C | -1.983980 | -0.958012 | -0.0106596 |
| C | -2.626015 | -0.692572 | -1.223853 |
| C | -4.109688 | -0.888590 | 1.128177 |
| C | -4.004201 | -0.525157 | -1.262213 |
| H | -2.037048 | -0.634978 | -2.133104 |
| C | -4.747222 | -0.619578 | -0.083703 |
| H | -4.710843 | -0.961109 | -2.028736 |
| H | -4.508687 | -0.322542 | -2.200503 |
| C | 3.470901 | -1.250504 | 0.070945 |
| C | 4.139771 | -1.010450 | 1.274454 |
| C | 5.529328 | -1.005869 | 1.310513 |
| H | 3.561353 | -0.844352 | 2.178181 |
| C | 5.505804 | -1.481431 | -1.052268 |
| C | 6.260540 | -1.240697 | 0.147822 |
| H | 6.042773 | -0.821926 | 2.249117 |
| H | 7.161113 | -1.671579 | -1.959418 |
| H | 7.345796 | -1.238116 | 0.177856 |
| N | 0.096481 | -1.483182 | -1.156987 |
| N | 1.370397 | -1.557598 | -1.143924 |
| N | 1.345394 | -1.532247 | 1.222840 |
| N | 0.070836 | -1.471050 | 1.209604 |
| C | 4.205301 | -1.485672 | -1.095027 |
| H | 3.676076 | -1.680331 | -2.021996 |
| C | 1.541476 | 0.913087 | -0.020519 |
| H | 2.088892 | 1.036023 | 0.915630 |
| C | 0.161498 | 0.991943 | 0.051095 |
| H | -0.371257 | 1.161230 | -0.886413 |
| C | 2.244430 | 1.408679 | -1.251332 |
| H | 3.211119 | 0.918597 | -1.405933 |
| H | 1.620527 | 1.208258 | -2.131162 |
| C | -0.478538 | 1.576646 | 1.277333 |
| H | 0.119216 | 1.313811 | 2.158795 |
| H | -1.494882 | 1.202859 | 1.438295 |
| C | -0.528086 | 3.111902 | 1.116795 |
| H | -1.274214 | 3.363784 | 0.351601 |
| H | -0.901608 | 3.533086 | 2.057360 |
| C | 0.807069 | 3.785909 | 0.753215 |
| H | 0.732313 | 4.834098 | 1.061738 |
| H | 1.608457 | 3.358730 | 1.371305 |
| C | 2.469714 | 2.929370 | -1.10413 8 |
| H | 2.887360 | 3.298292 | -2.048084 |
| H | 3.240082 | 3.100324 | -0.340772 |
| C | 1.220565 | 3.754827 | -0.746131 |
| H | 1.414269 | 4.784843 | -1.064120 |
| H | 0.374303 | 3.416823 | -1.359530 |
| C | -2.732793 | -1.058471 | 1.167273 |
| H | -2.223335 | -1.274287 | 2.100310 |
| C | -6.223657 | -0.438290 | -0.067031 |
| O | -6.737561 | -0.201805 | -1.290860 |
| H | -7.696842 | -0.100746 | -1.166195 |


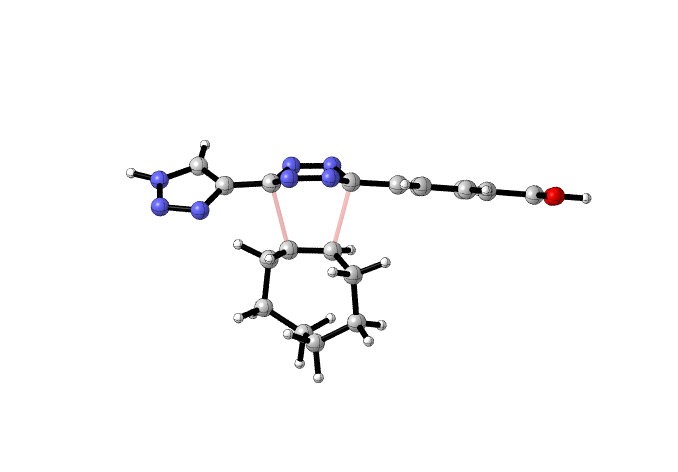


**TS-Ta-Tz-TCO**

*G*(water) = -1269.742729Hartree

| C | -2.114873 | -1.351116 | -0.101911 |
| --- | --- | --- | --- |
| C | 0.3676 12. | -1.166988 | -0.035061 |
| C | 1.831655 | -0.953049 | 0.022841 |
| C | 2.442888 | -0.682822 | 1.252050 |
| C | 3.809963 | -0.458721 | 1.312597 |
| H | 1.837362 | -0.665202 | 2.152321 |
| C | 3.971536 | -0.774090 | -1.081781 |
| C | 4.576552 | -0.502355 | 0.146369 |
| H | 4.305938 | -0.249269 | 2.254747 |
| H | 4.575166 | -0.809870 | -1.981863 |
| N | -1.459307 | -1.599491 | -1.285064 |
| N | -0.185369 | - 1.505076 | -1.244501 |
| N | -0.244431 | -1.586665 | 1.118850 |
| N | -1.519665 | -1.692591 | 1.083947 |
| C | 2.601763 | -0.997599 | -1.144035 |
| H | 2.115591 | -1.214038 | -2.089299 |
| C | -0.399284 | 0.956788 | -0.035411 |
| H | 0.117151 | 1.114714 | 0.913308 |
| C | 1.771294 | 0.816792 | 0.008784 |
| H | -2.316359 | 0.916064 | -0.931890 |
| C | 0.240098 | 1.574566 | -1.243211 |
| H | 1.275993 | 1.249586 | -1.384850 |
| H | -0.328078 | 1.294250 | -2.138519 |
| C | -2.515423 | 1.249692 | 1.238909 |
| H | - 1.896300 | 1.066363 | 2.125821 |
| H | -3.458989 | 0.709432 | 1.370528 |
| C | -2.810621 | 2.760345 | 1.107427 |
| H | -3.575836 | 2.903552 | 0.333631 |
| H | -3.257491 | 3.099540 | 2.049323 |
| C | -1.592716 | 3.643297 | 0.777443 |
| H | -1.833819 | 4.659538 | 1.106952 |
| H | -0.741580 | 3.331589 | 1.397840 |
| C | 0.213317 | 3.110166 | -1.066140 |
| H | 0.578368 | 3.559080 | -1.997166 |
| H | 0.935040 | 3.390187 | -0.287405 |
| C | -1.159722 | 3.712586 | -0.715606 |
| H | -1.133085 | 4.766721 | -1.011344 |
| H | -1.928999 | 3.252451 | -1.350065 |
| C | -3.580214 | -1.397211 | -0.120245 |
| C | -4.426905 | -1.965695 | 0.80201 8 |
| N | -5.649825 | -1.688142 | 0.305655 |
| H | -4.248512 | -2.515301 | 1.711906 |
| N | -5.579793 | -0.989633 | -0.834658 |
| N | -4.327682 | -0.808944 | -1.095488 |
| H | -6.557706 | -1.937070 | 0.672558 |
| C | 6.037792 | -0.250682 | 0.267399 |
| O | 6.609217 | -0.002993 | 1.301730 |
| O | 6.683939 | -0.324935 | -0.913274 |
| H | 7.620649 | -0.148518 | -0.719977 |


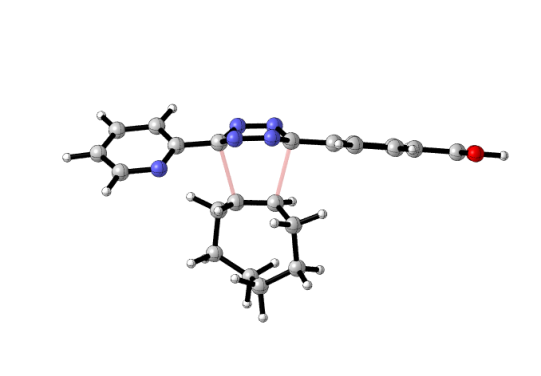


**TS-Py-Tz-TCO**

*G*(water) = -1275.752639Hartree

| C | -1.967951 | -1.265317 | -0.087471 |
| --- | --- | --- | --- |
| C | 0.521772 | -1.149327 | -0.034282 |
| C | -3.456010 | -1.253280 | -0.122534 |
| C | -4.195651 | -1.843815 | 0.903570 |
| C | -5.339193 | -0.604862 | -1.233451 |
| C | -5.582667 | -1.799652 | 0.821324 |
| H | -3.681060 | -2.320888 | 1.729277 |
| C | -6.171636 | -1.171593 | -0.270226 |
| H | -5.762335 | -0.096696 | -2.097101 |
| H | -6.192602 | -2.252408 | 1.597126 |
| H | -7.249527 | -1.113901 | -0.376396 |
| C | 1.990661 | -0.970384 | 0.015081 |
| C | 2.616722 | -0.727719 | 1.242632 |
| C | 3.988497 | -0.531947 | 1.295012 |
| H | 2.018061 | -0.708015 | 2.147447 |
| C | 4.125491 | -0.823737 | -1.103975 |
| C | 4.745127 | -0.577478 | 0.122329 |
| H | 4.495383 | -0.342876 | 2.235659 |
| H | 4.721578 | -0.861769 | -2.008987 |
| N | -1.323891 | -1.520744 | -1.276070 |
| N | -0.047653 | -1.465094 | -1.242241 |
| N | -0.093859 | -1.562746 | 1.118739 |
| N | -1.372124 | -1.635444 | 1.086447 |
| N | -4.009836 | -0.634725 | -1.169193 |
| C | 2.750992 | -1.018666 | -1.157980 |
| H | 2.253188 | -1.214696 | -2.101625 |
| C | -0.185056 | 0.997061 | -0.003341 |
| H | 0.342289 | 1.133436 | 0.942795 |
| C | -1.559356 | 0.891036 | 0.048324 |
| H | -2.107962 | 1.005178 | -0.888035 |
| C | 0.460798 | 1.610566 | -1.210028 |
| H | 1.487891. | 1.262973 | -1.361632 |
| H | -0.119663 | 1.351081 | -2.103776 |
| C | -2.285132 | 1.327823 | 1.288559 |
| H | -1.664836 | 1.119192 | 2.168944 |
| H | -3.241192 | 0.810767 | 1. 424344 |
| C | -2.543428 | 2.846672 | 1.175629 |

| H | -3.311405 | 3.016984 | 0.409746 |
| --- | --- | --- | --- |
| H | -2.974272 | 3.187278 | 2.124407 |
| C | -1.307878 | 3.703897 | 0.843270 |
| H | -1.523051 | 4.722690 | 1.183012 |
| H | -0.459499 | 3.368066 | 1.4547 79 |
| C | 0.471246 | 3.144691 | -1.019062 |
| H | 0.840085 | 3.594157 | -1.948401 |
| H | 1.204803 | 3.400426 | -0.243058 |
| C | -0.884565 | 3.775885 | -0.652462 |
| H | -0.835855 | 4.831677 | -0.939649 |
| H | -1.668948 | 3.338517 | -1.284592 |
| C | 6.211683 | -0.354775 | 0.234046 |
| O | 6.796035 | -0.127900 | 1.265955 |
| O | 6.847118 | -0.429304 | -0.952579 |
| H | 7.788448 | -0.272761 | -0.764846 |

# 8. References

[1] J. Kang, J. Young Lee, İ. Taş, K.N. More, H. Kim, J.H. Park, D.J. Chang, *Bioorg. Med. Chem. Lett.* **2018**, 28, 3658–3664.

[2] S. Juliane, J. Andres, S. Ayan, W. Manfred, PCT Int. Appl. **2013**, WO 2013029801 A1 20130307.

[3] P. E. Z. Klier, A. M. M. Gest, J. G. Martin, R. Roo, M. X. Navarro, L. Lesiak, P. E. Deal, N. Dadina, J. Tyson, A. Schepartz, E. W. Miller, *J. Am. Chem. Soc.* **2022**, 144, 12138–12146.

[4] D. M. Patterson, L. A. Nazarova, B. Xie, D. N. Kamber, J. A.Prescher, *J. Am. Chem.Soc.* **2012**,134, 18638–18643.

[5] M. R. Karver, R. Weissleder, S. A. Hilderbrand, *Bioconjugate Chem.* **2011**, 22, 2263–2270.

[6] A. Darko, S. J. Boyd, J. M. Fox, Synthesis **2018**, 50, 4875–4882.

[7] Y. Xie, Y. Fang, Z. Huang, A. M. Tallon, C. W. am Ende, J. M. Fox, *Angew. Chem. Int. Ed.* **2020**, 59, 16967–16973.

[8] S. D. Schnell, J. A. Gonzalez, J. Sklyaruk, A. Linden, K. Gademann, *J. Org. Chem.* ***2021***. 86, 12008–12023.

[9] J. Rokka, A. Snellman, C. Zona, B. La Ferla, F. Nicotra, M. Salmona, G.Forloni, M. Haaparanta-Solin, J. O. Rinne, O. Solin, *Bioorg. Med. Chem.* **2014**, 22, 2753–2762.

[10] M. J. Frisch, G. W. Trucks, H. B. Schlegel, G. E. Scuseria, M. A. Robb, J. R. Cheeseman, G. Scalmani, V. Barone, B. Mennucci, G. A. Petersson, Nakatsuji, H.; Caricato, M.; Li, X.; Hratchian, H. P.; Izmaylov, A. F.; Bloino, J.; Zheng, G.; Sonnenberg, J. L.; Hada, M.; Ehara, M.; Toyota, K.; Fukuda, R.; Hasegawa, J.; Ishida, M.; Nakajima, T.; Honda, Y.; Kitao, O.; Nakai, H.; Vreven, T.; Montgomery, J. A., Jr.; Peralta, J. E.; Ogliaro, F.; Bearpark, M.; Heyd, J. J.; Brothers, E.; Kudin, K. N.; Staroverov, V. N.; Keith, T.; Kobayashi, R.; Normand, J.; Raghavachari, K.; Rendell, A.; Burant, J. C.; Iyengar, S. S.; Tomasi, J.; Cossi, M.; Rega, N.; Millam, J. M.; Klene, M.; Knox, J. E.; Cross, J. B.; Bakken, V.; Adamo, C.; Jaramillo, J.; Gomperts, R.; Stratmann, R. E.; Yazyev, O.; Austin, A. J.; Cammi, R.; Pomelli, C.; Ochterski, J. W.; Martin, R. L.; Morokuma, K.; Zakrzewski, V. G.; Voth, G. A.; Salvador, P.; Dannenberg, J. J.; Dapprich, S.; Daniels, A. D.; Farkas, O.; Foresman, J. B.; Ortiz, J. V.; Cioslowski, J.; Fox, D. J. Gaussian 09, revision D.01; Gaussian Inc.: Wallingford, CT, **2013**.

[11] Y. Zhao, D. G. Truhlar, *Theor. Chem. Acc.* **2008**, 120, 215–241.

[12] Y. Zhao, D. G. Truhlar, *Phys. Chem. Chem. Phys.* **2008**, 10, 2813–2818.

[13] R. F. Ribeiro, A. V. Marenich, C. J. Cramer, D. G. Truhlar, *J. Phys. Chem. B* **2011**, 115, 14556–14562.

[14] M. Cossi, N. Rega, G. Scalmani, V. Barone, *J. Comput. Chem.* **2003**, 24, 669–681.

[15] F. Liu, Y. Liang, K. N. Houk, *Acc. Chem. Res.* **2017**, 50, 2297–2308.

9. NMR spectra


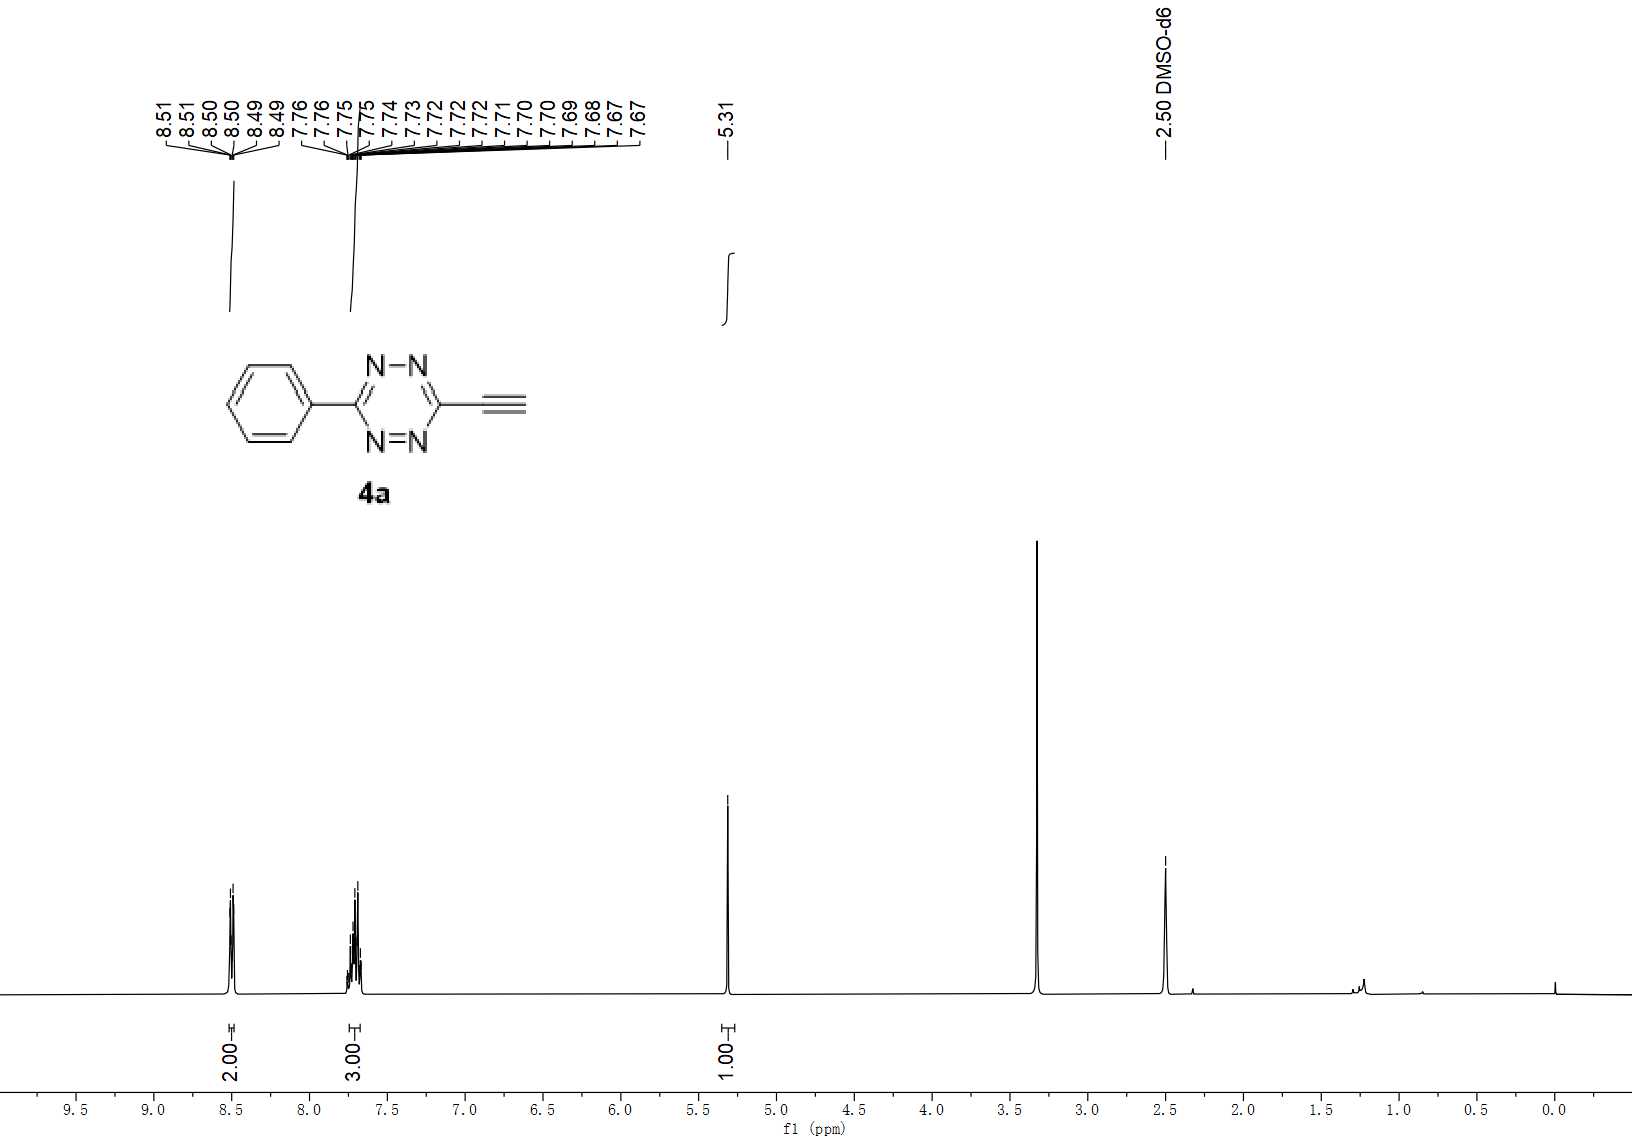

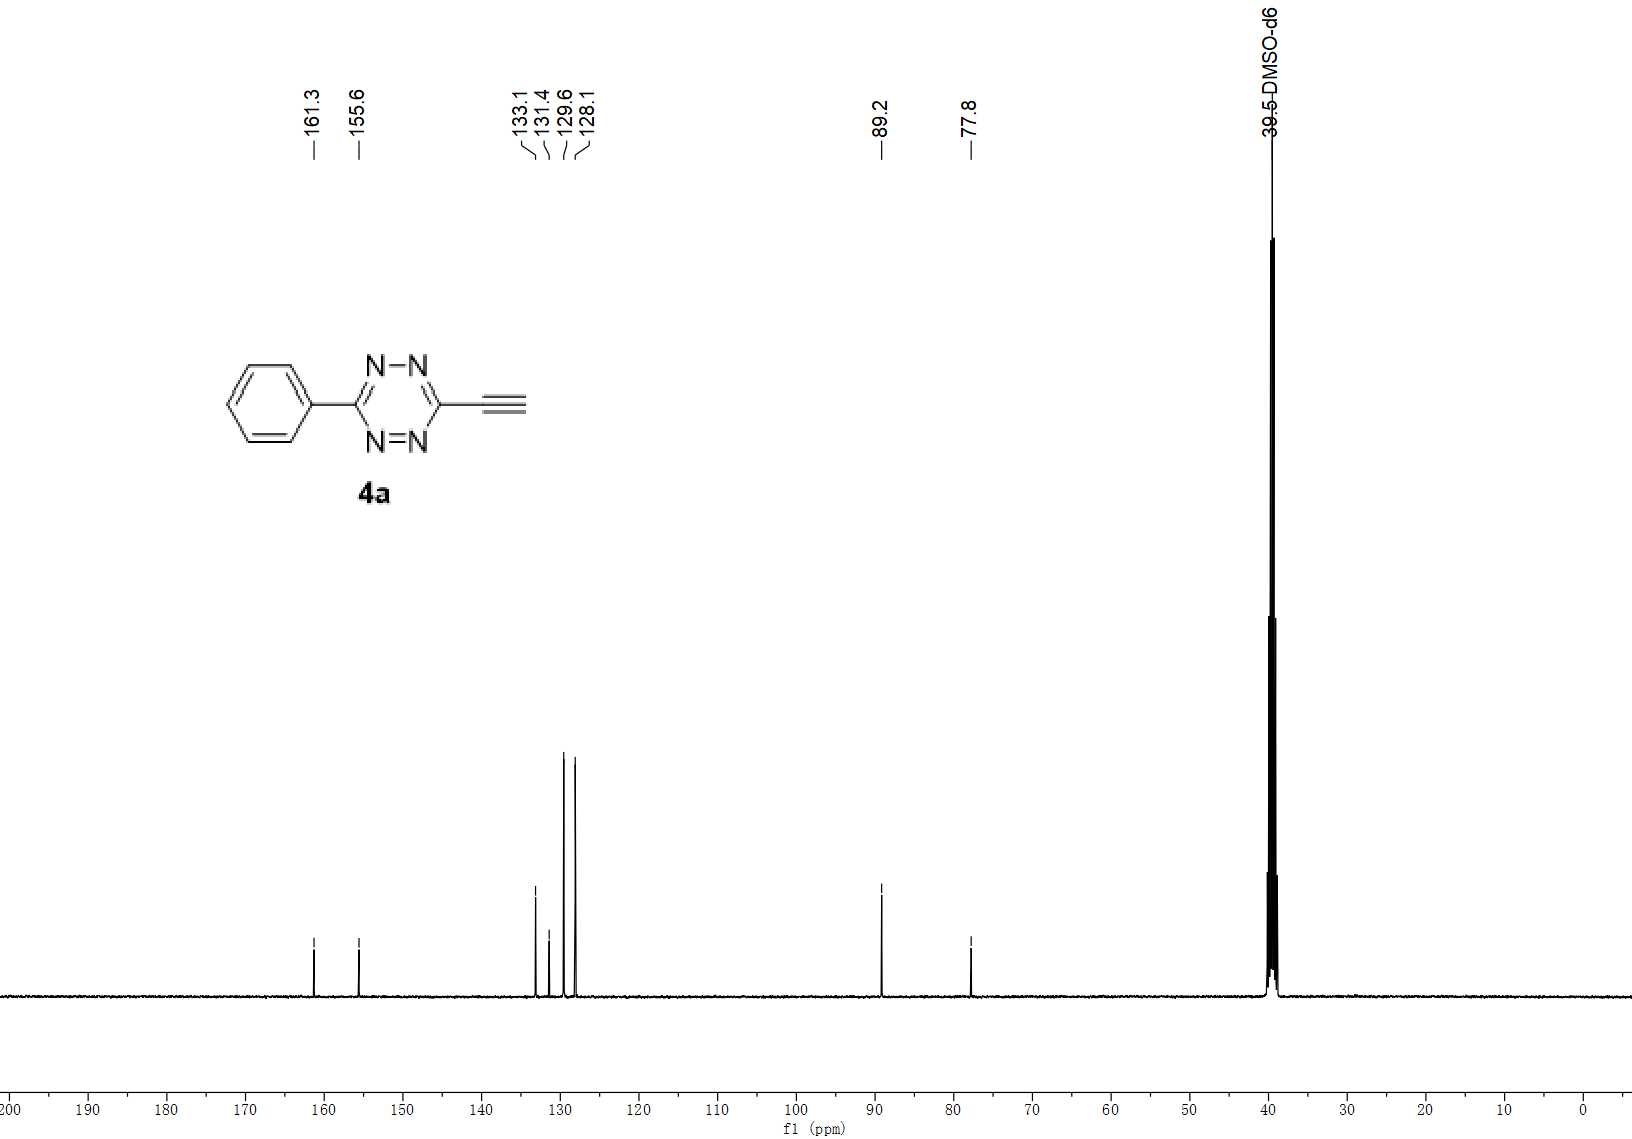

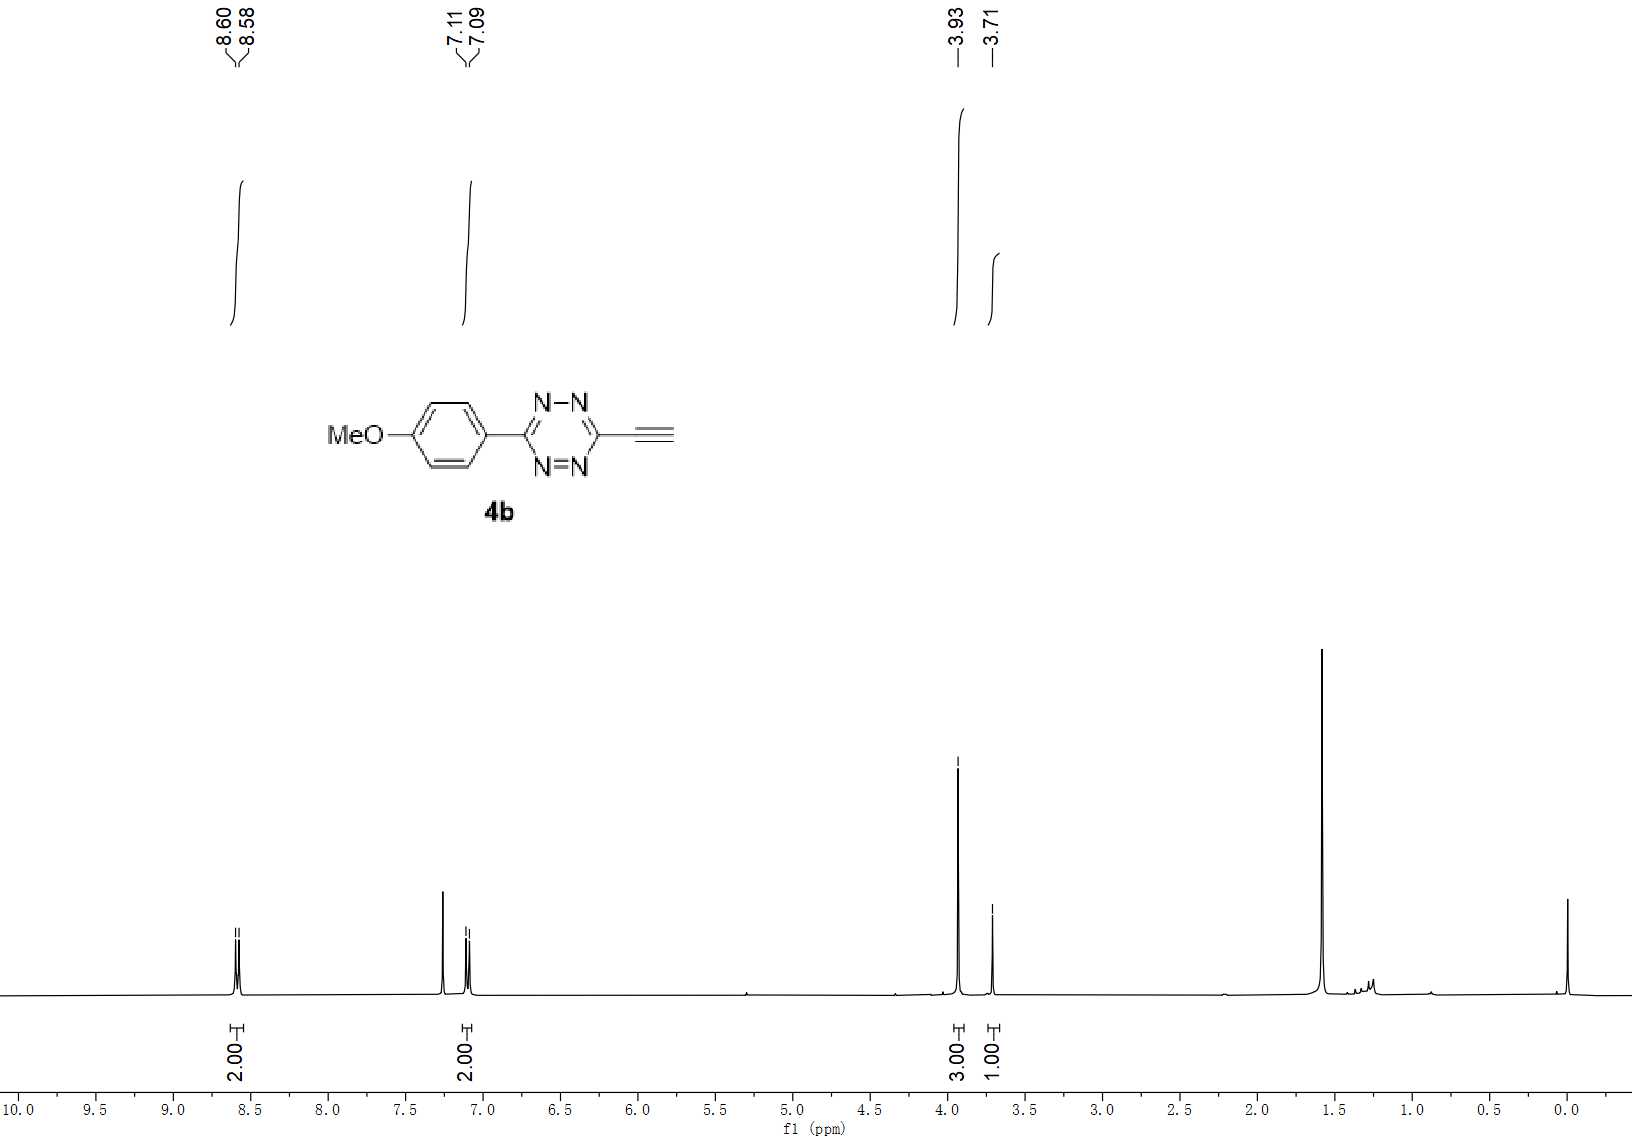

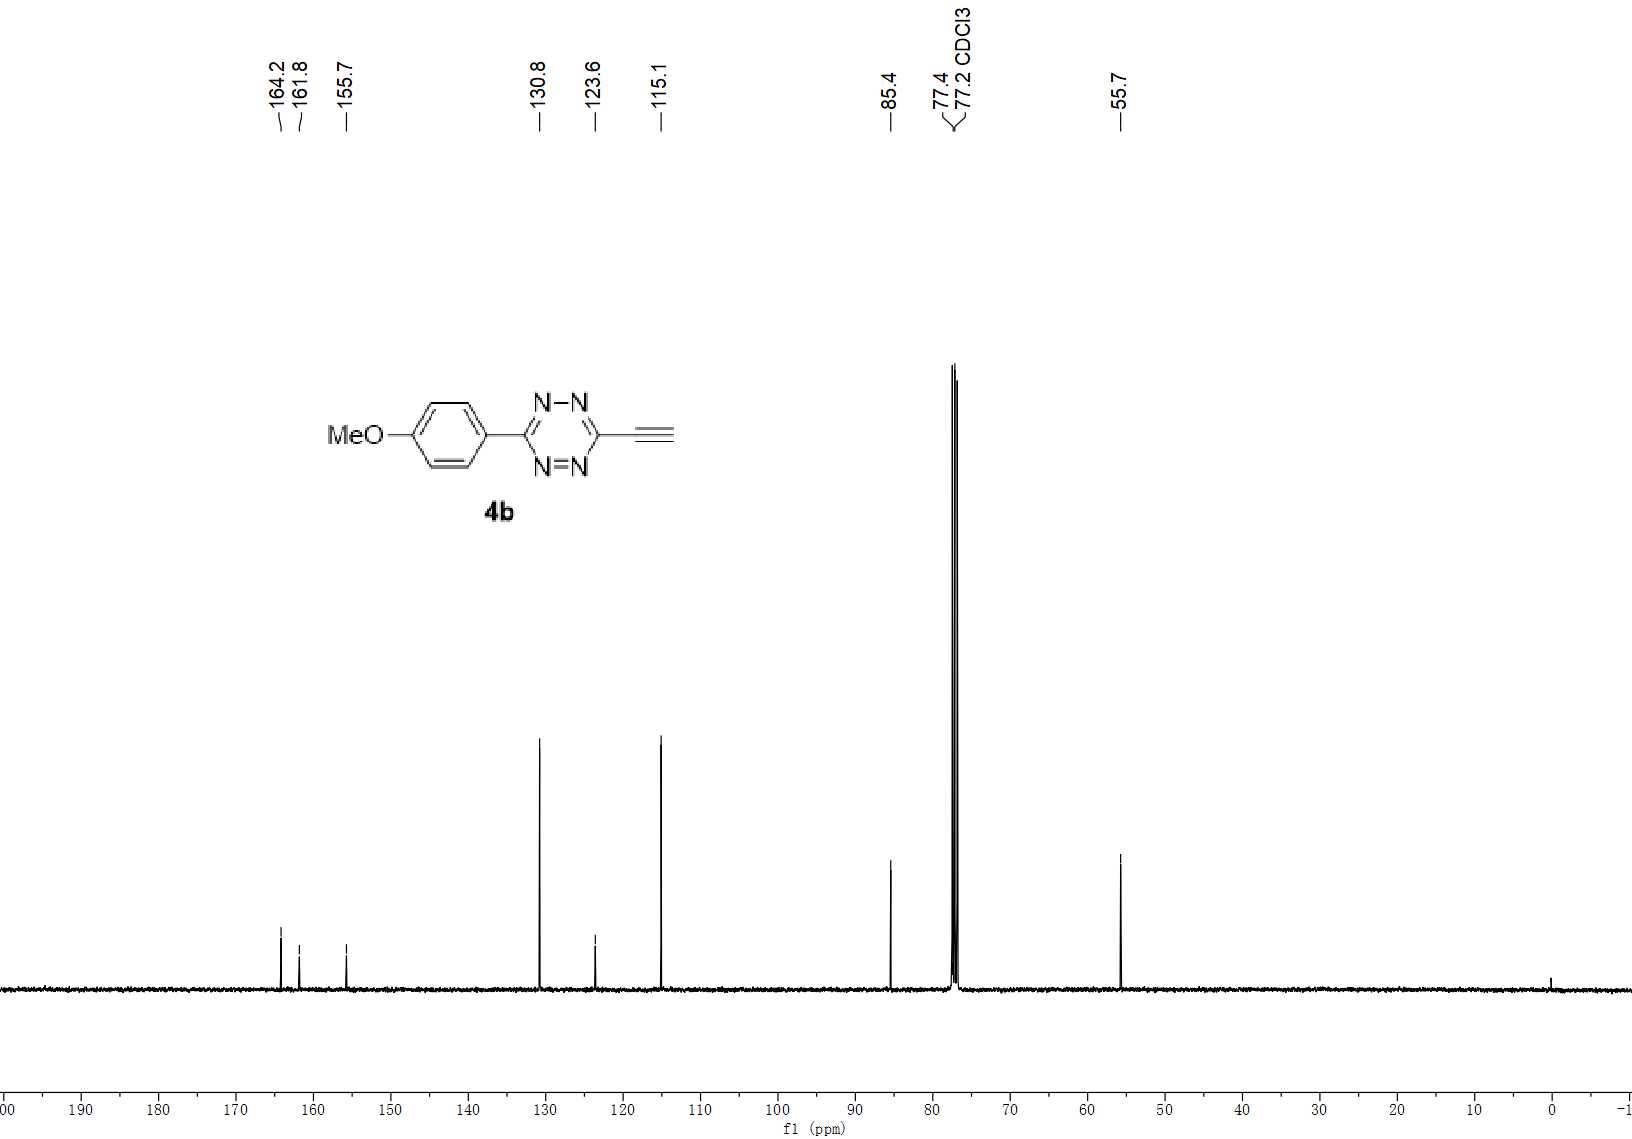

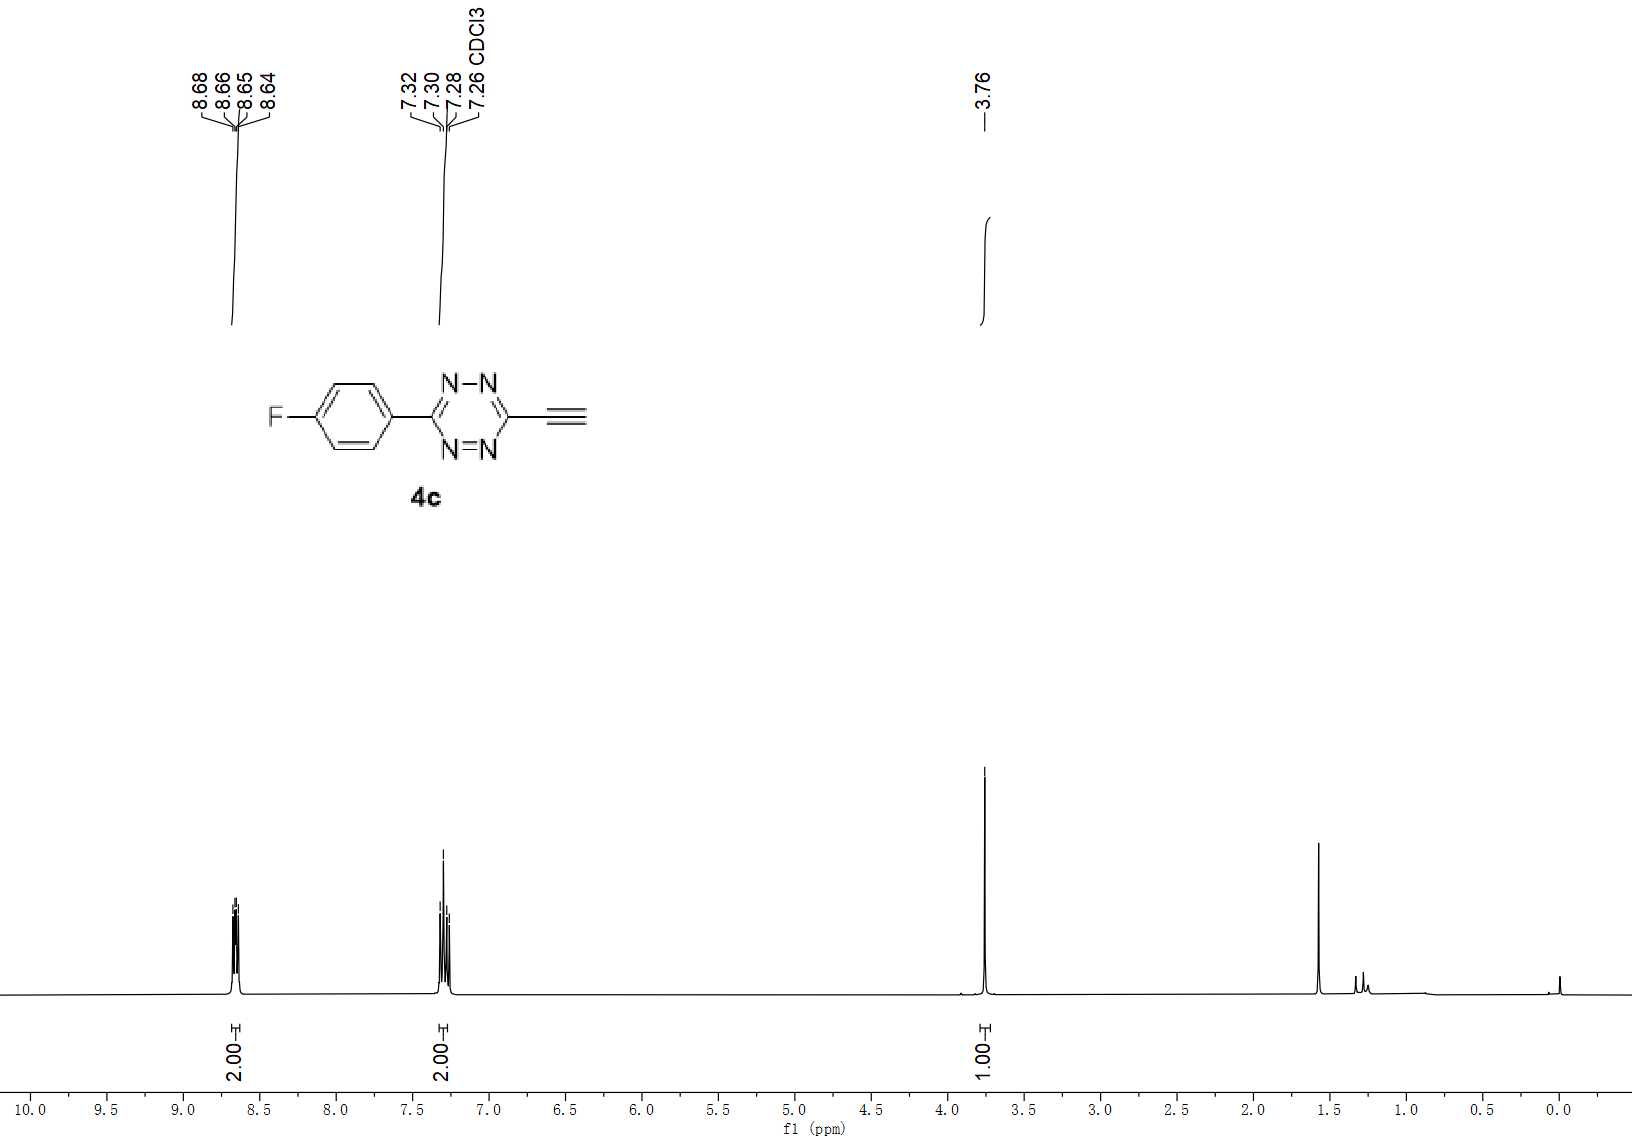

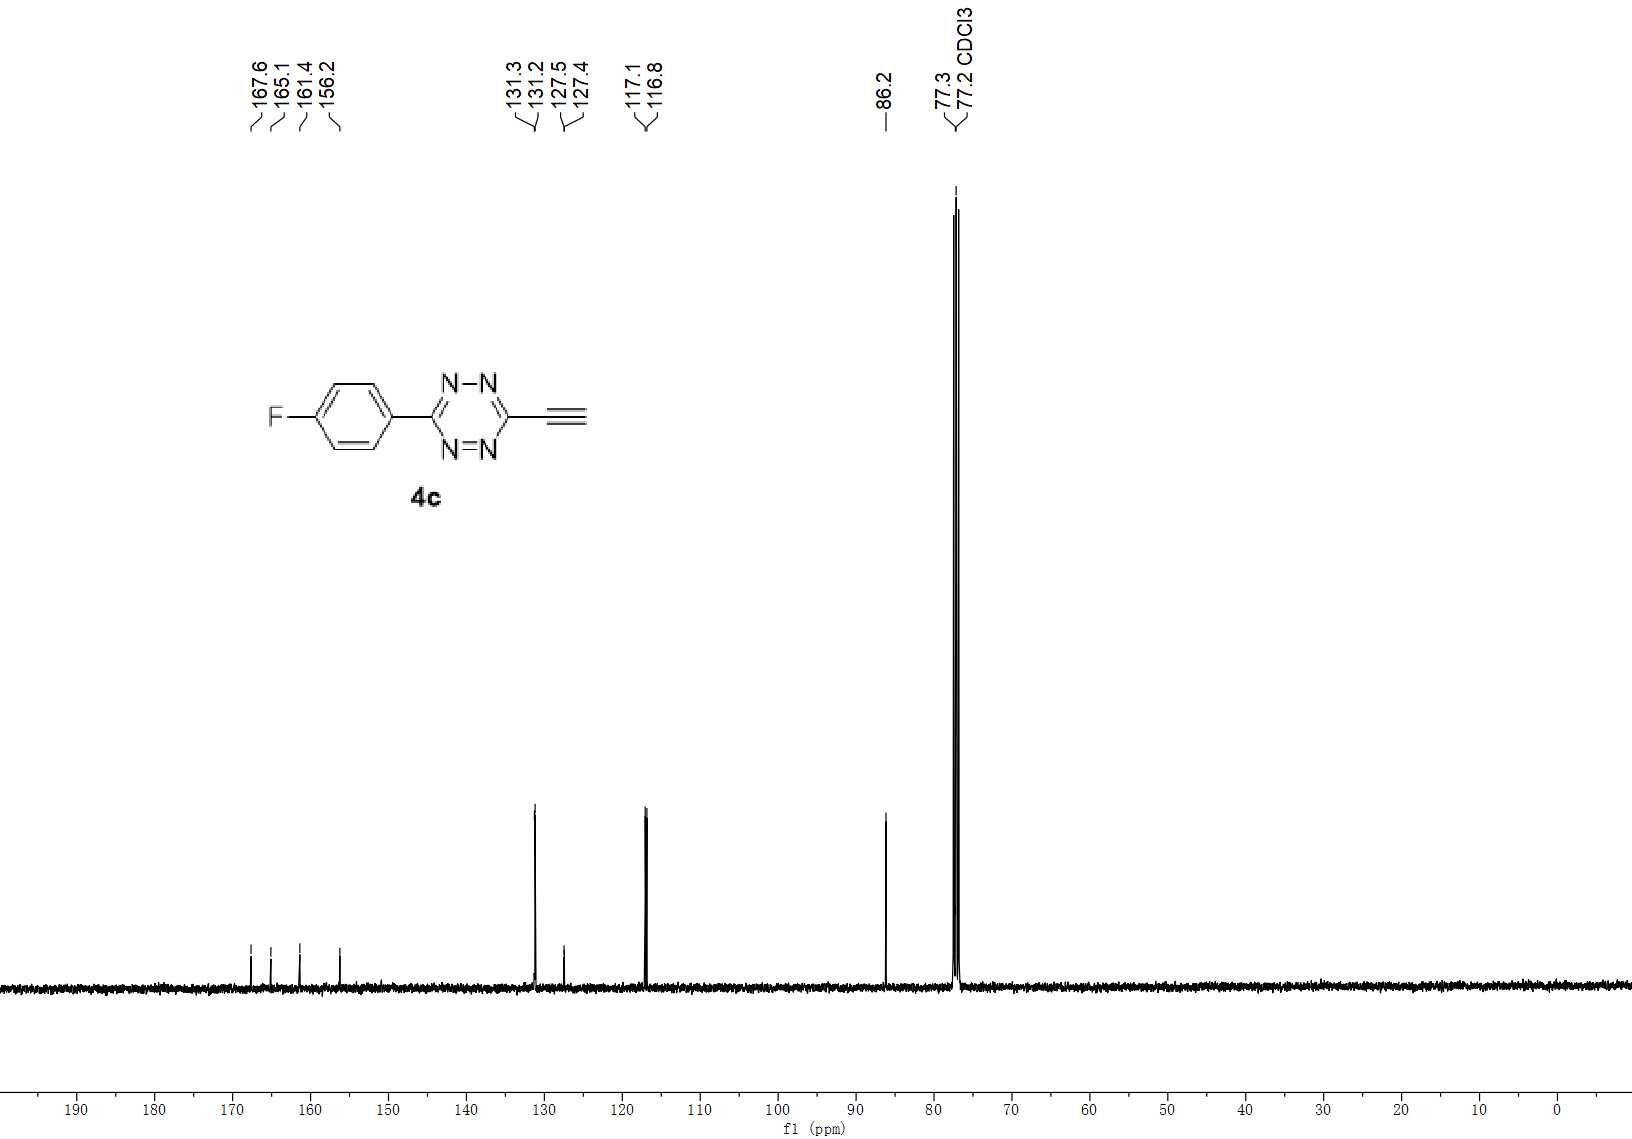

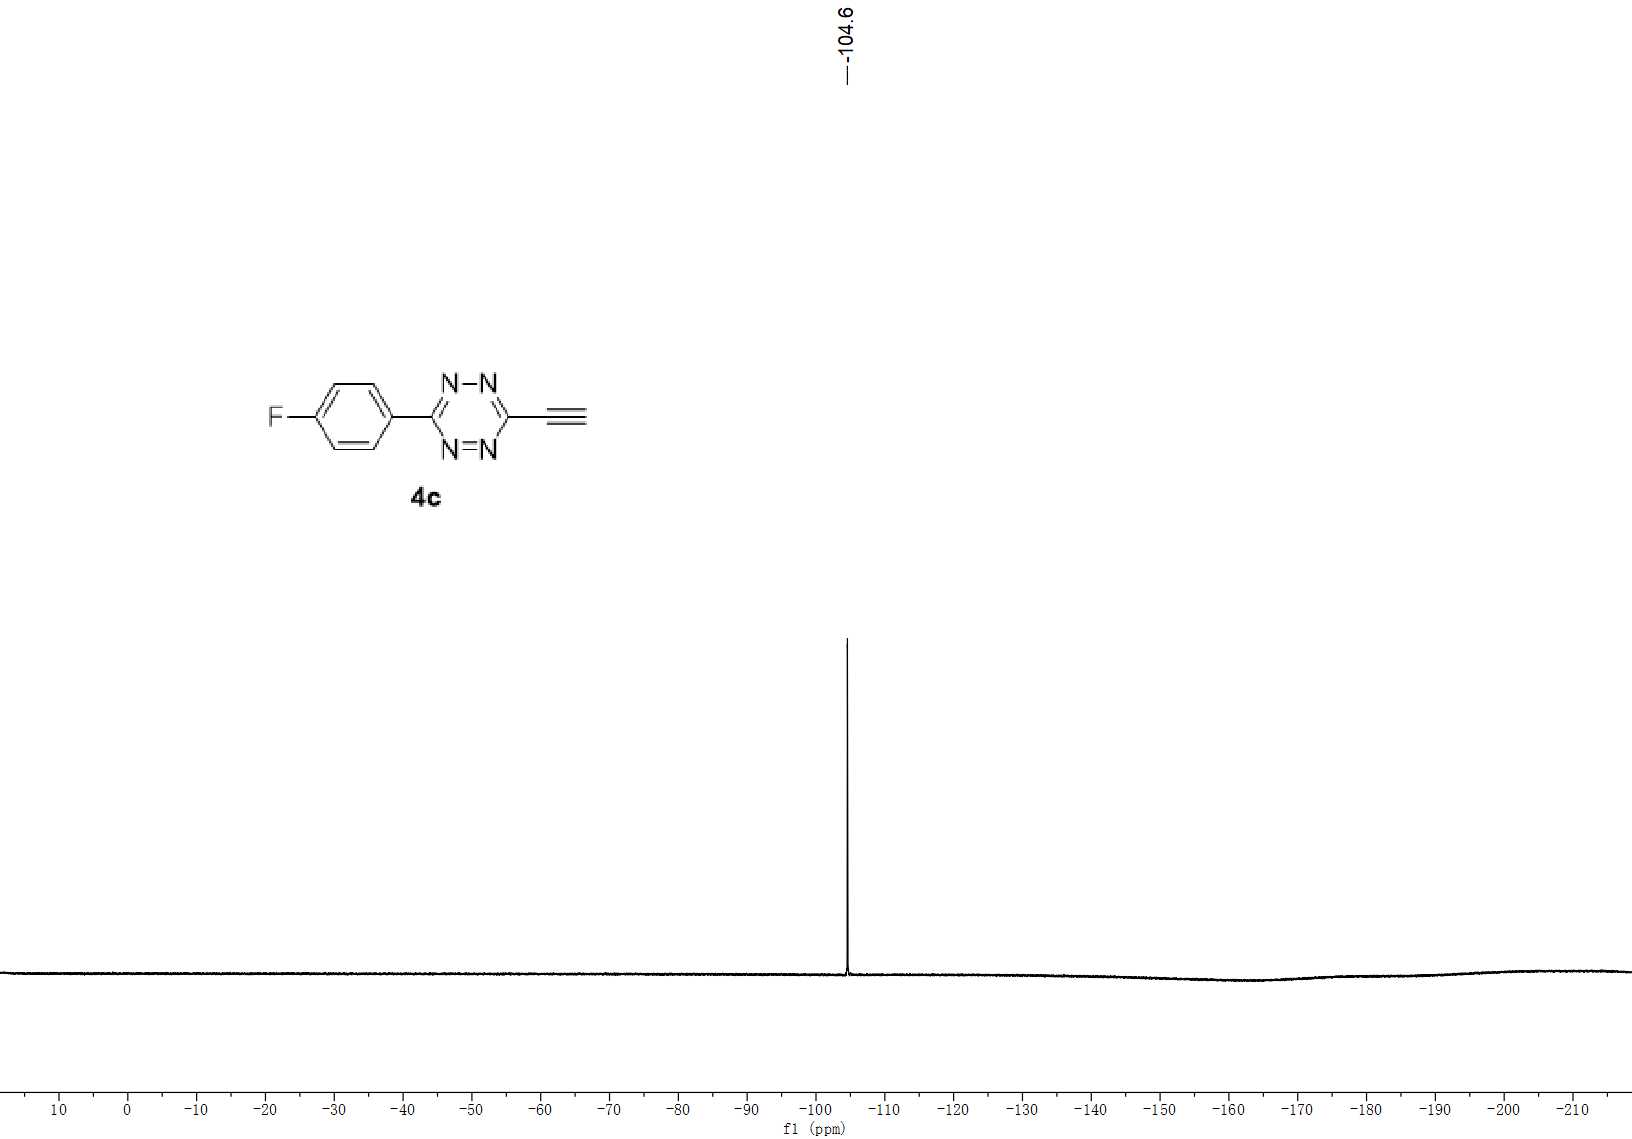

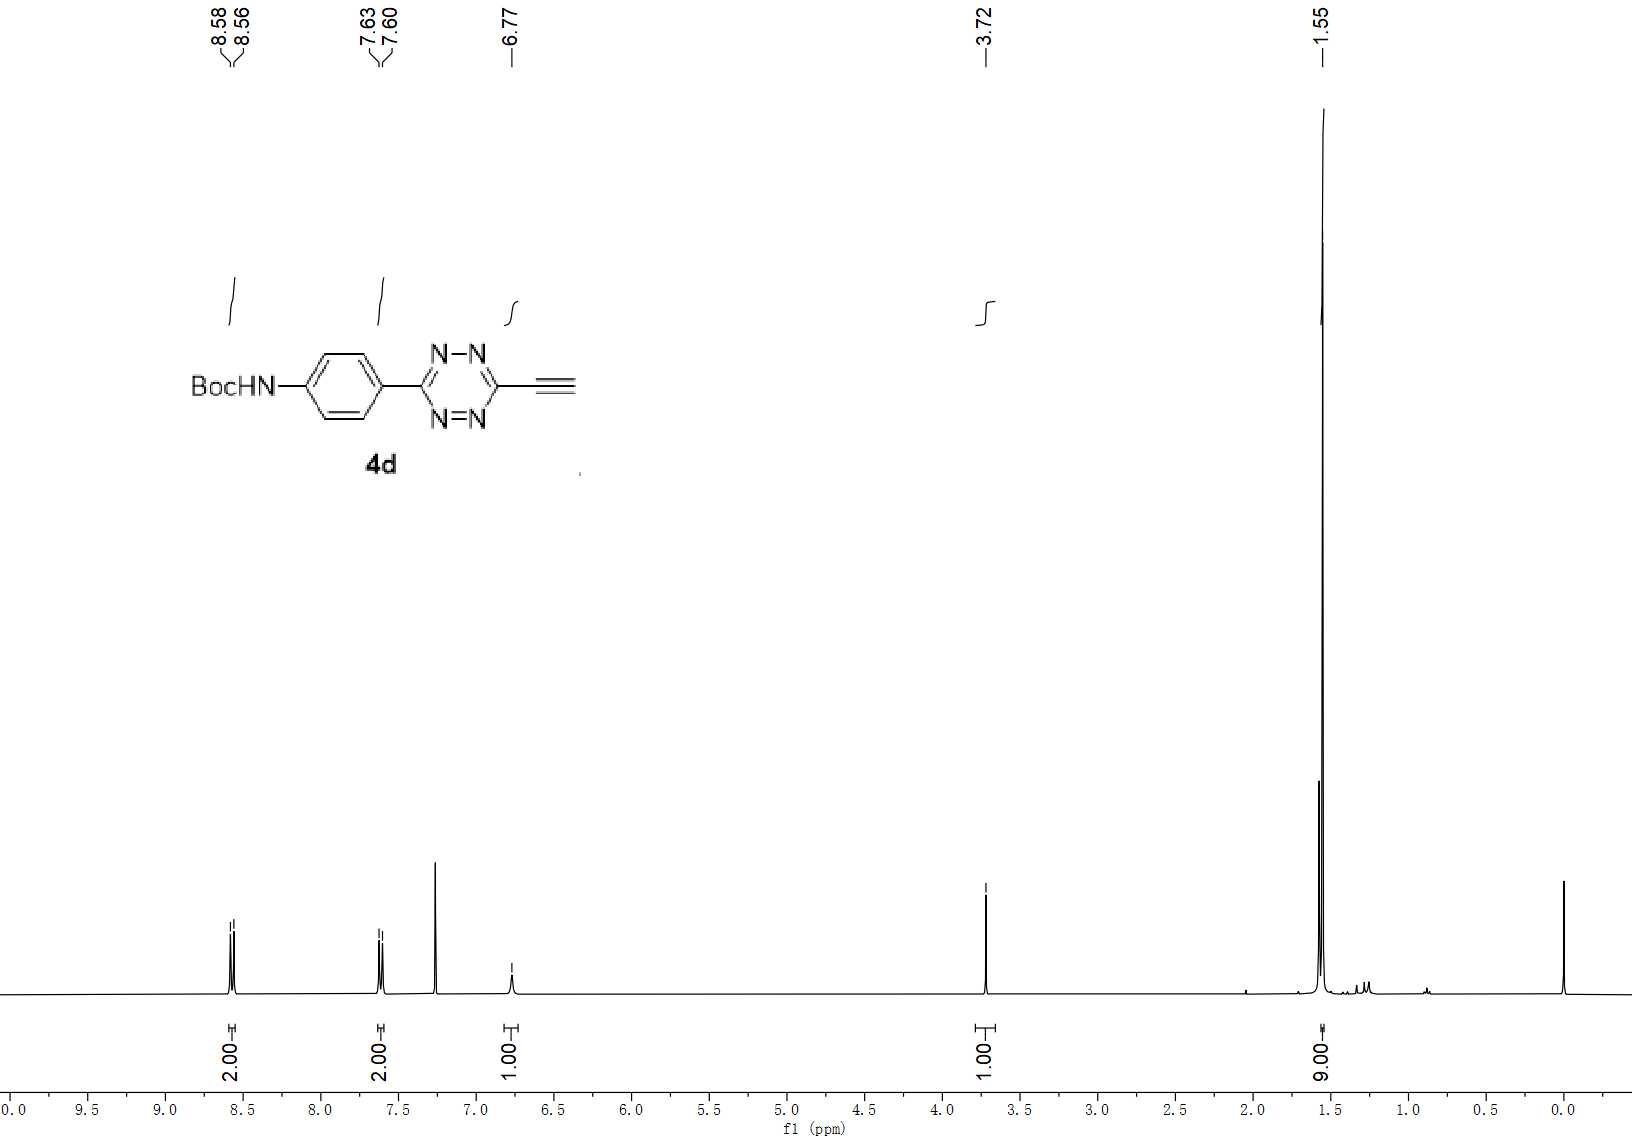

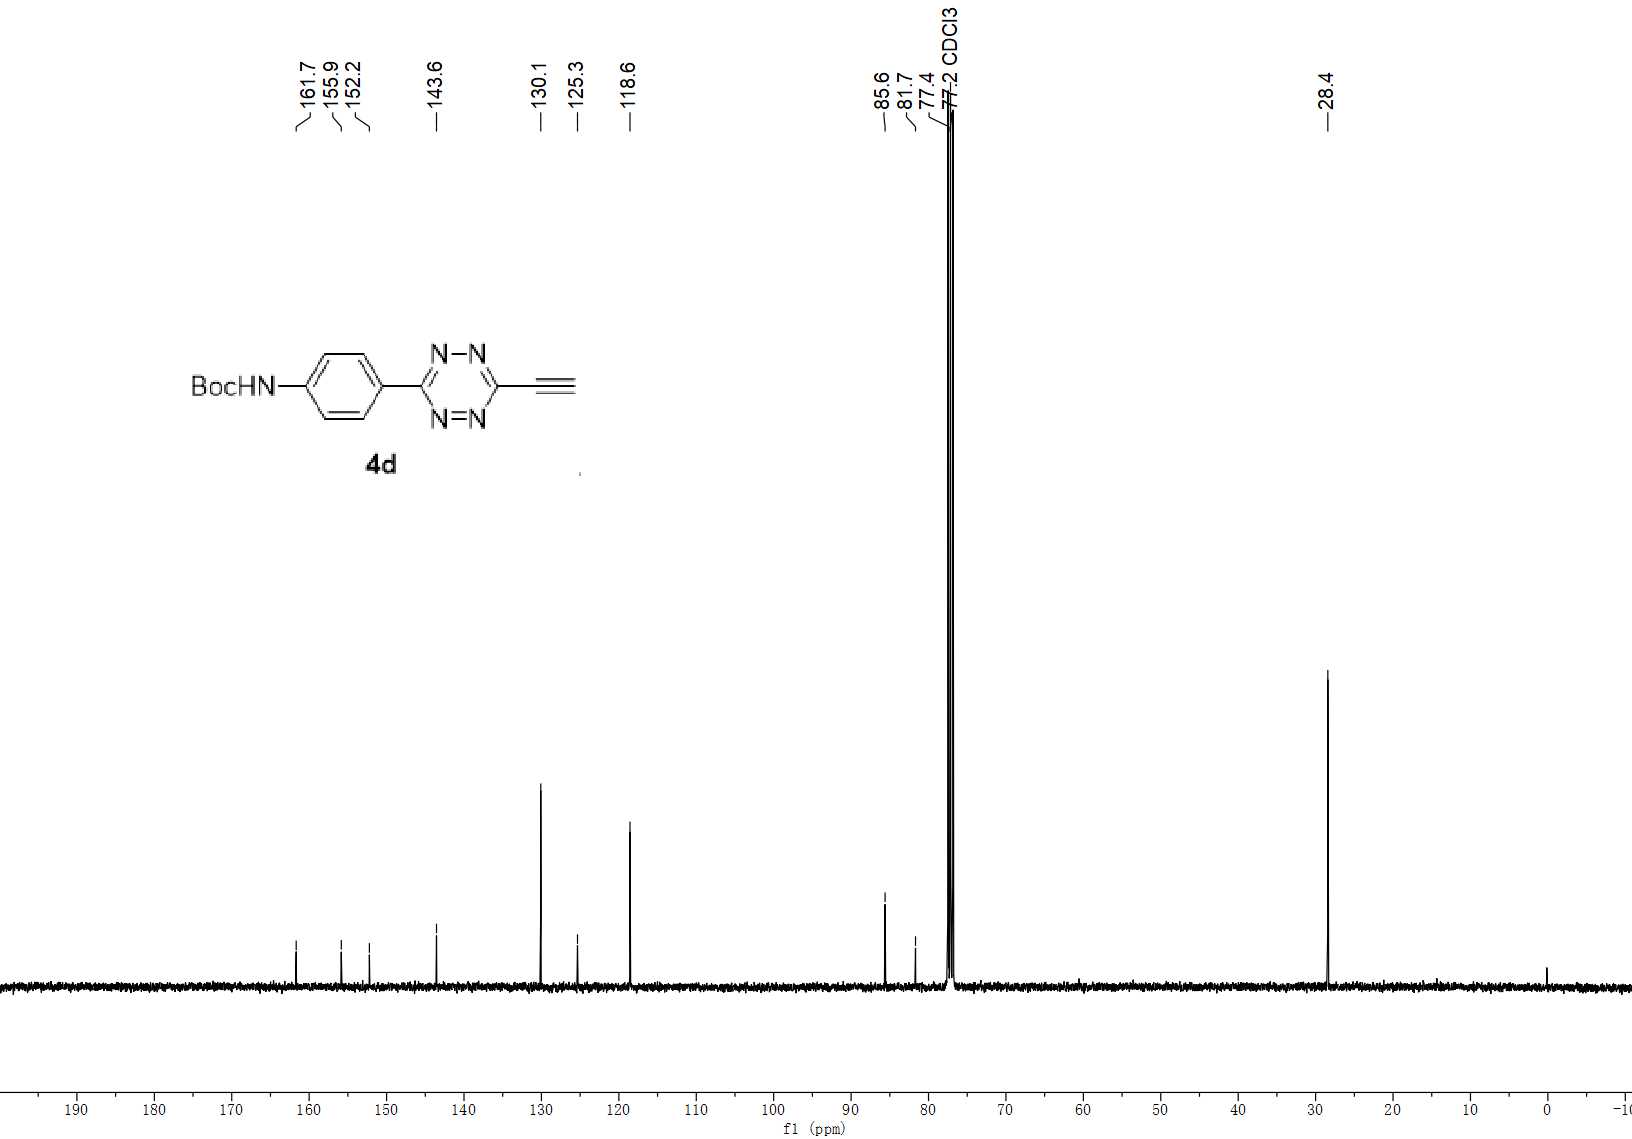

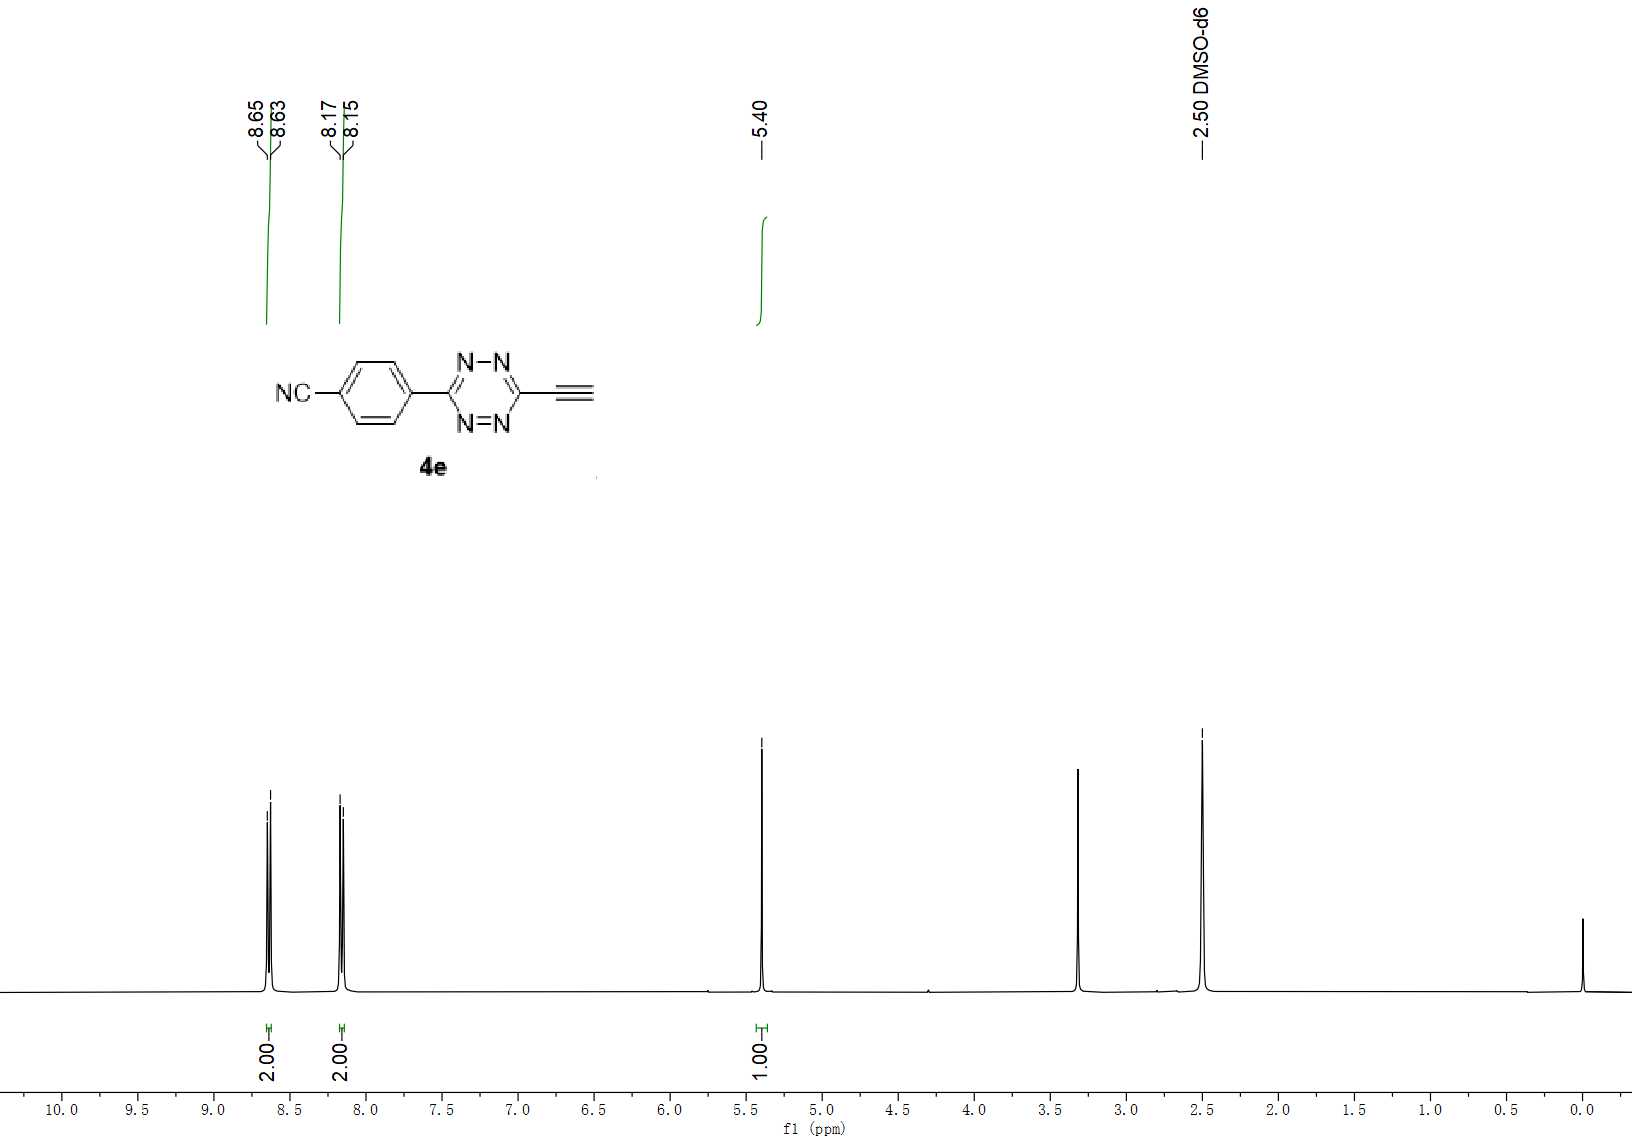

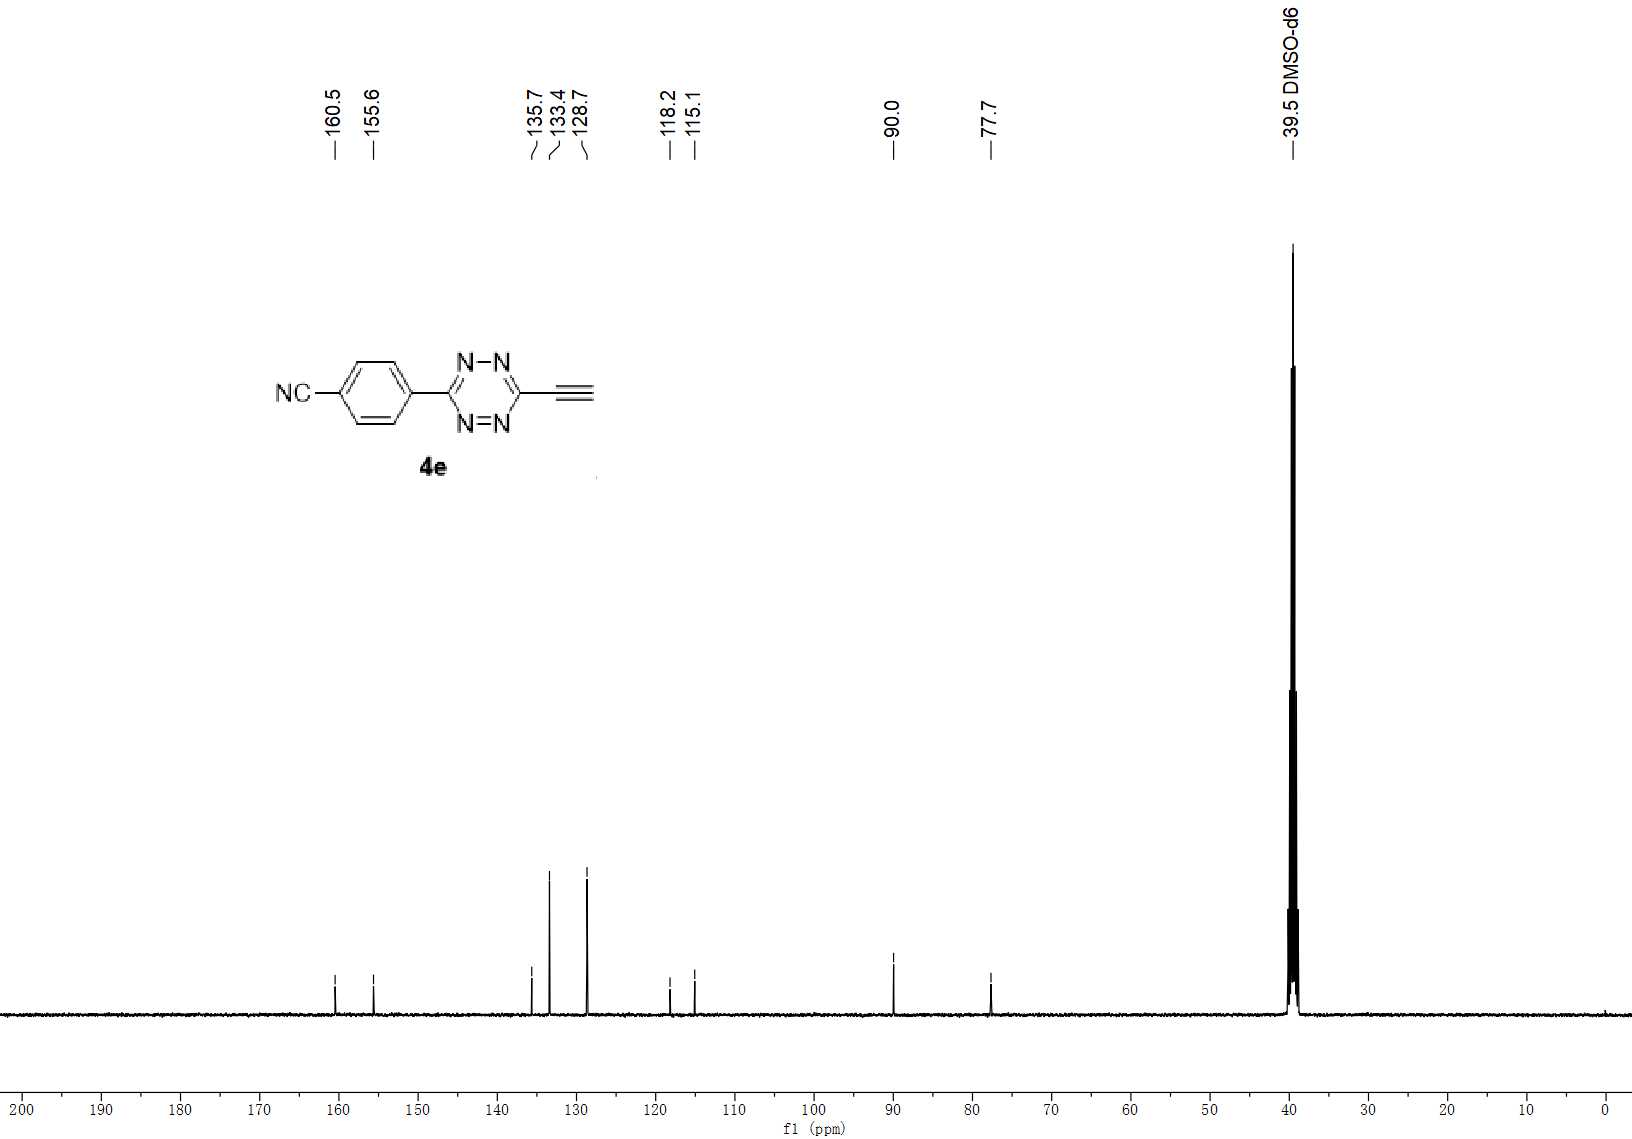

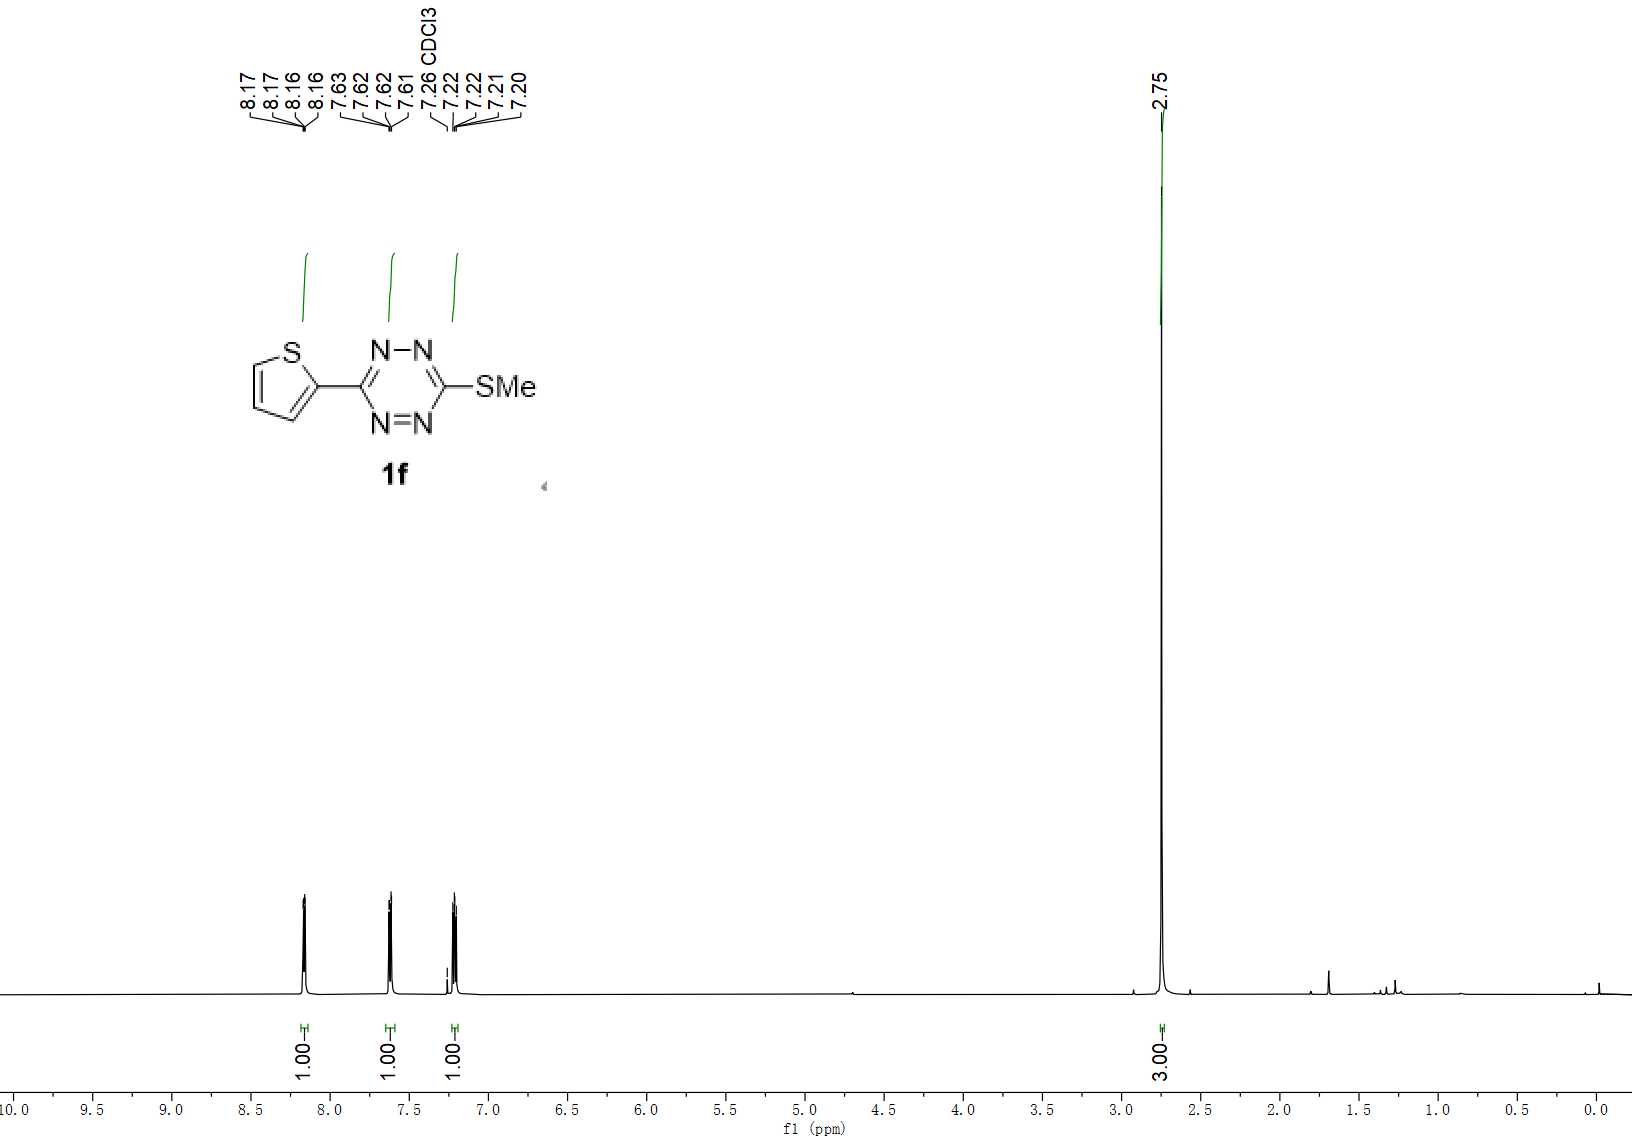

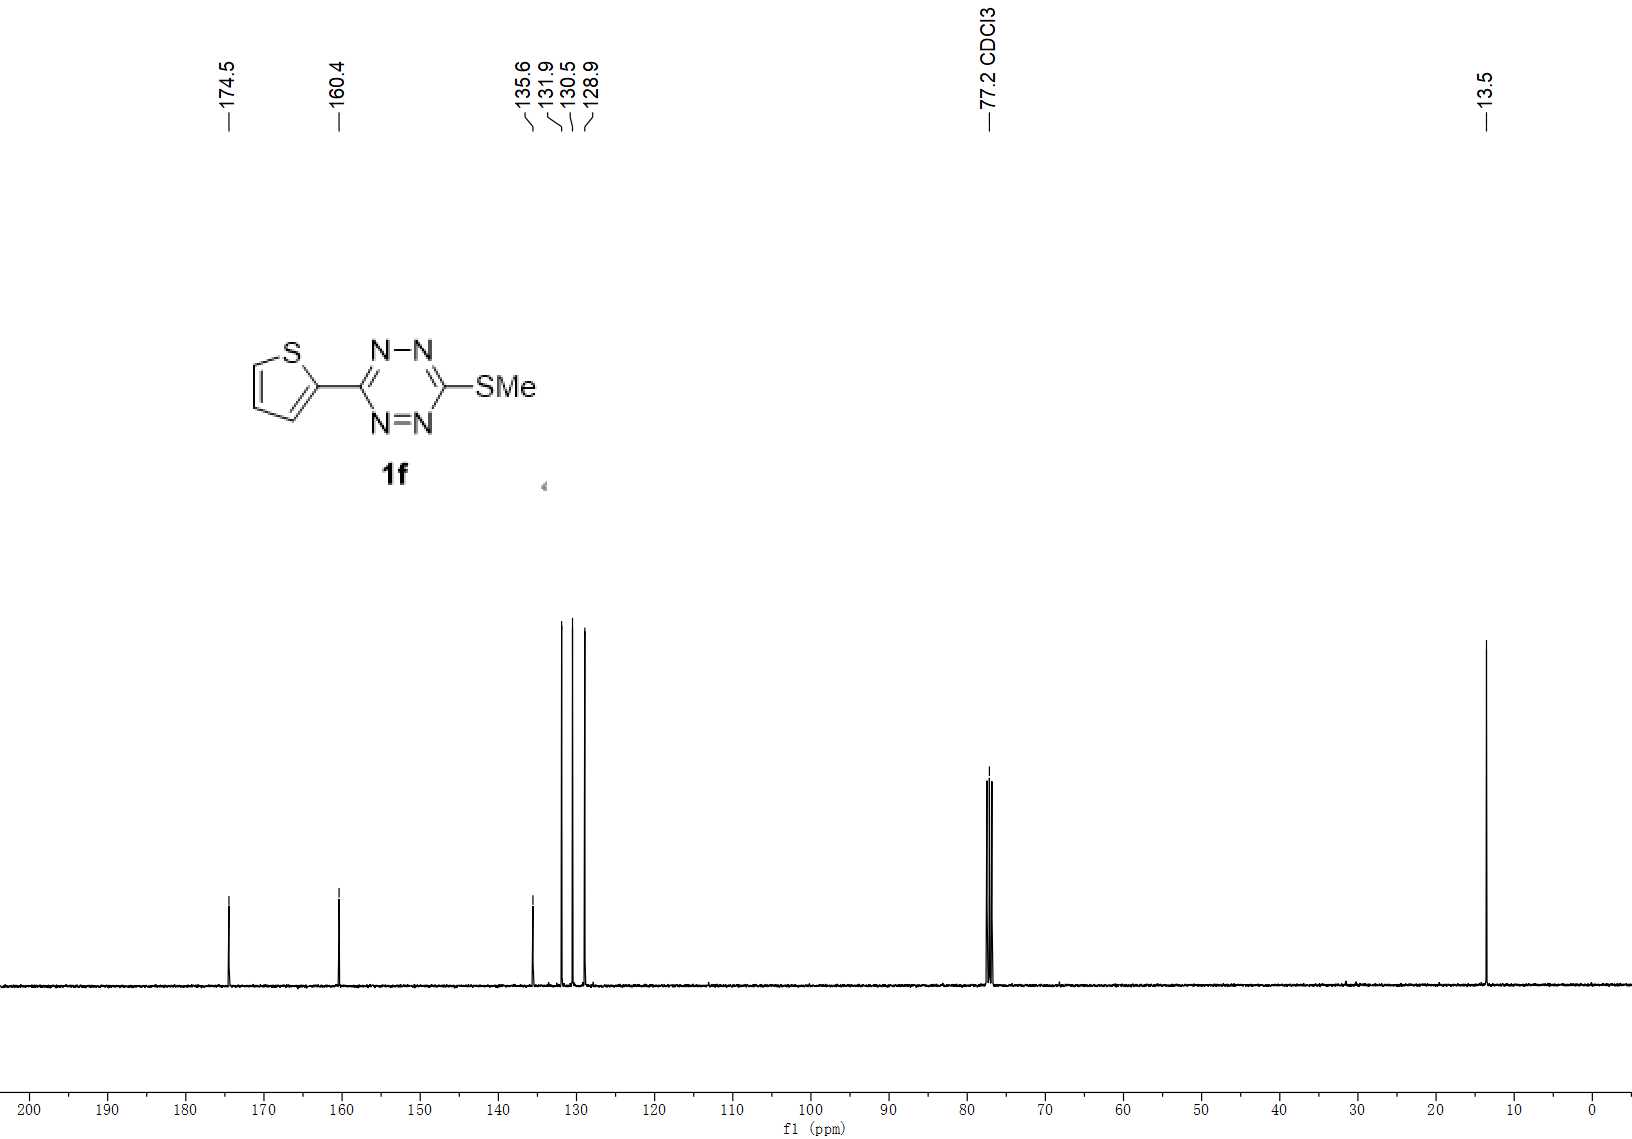

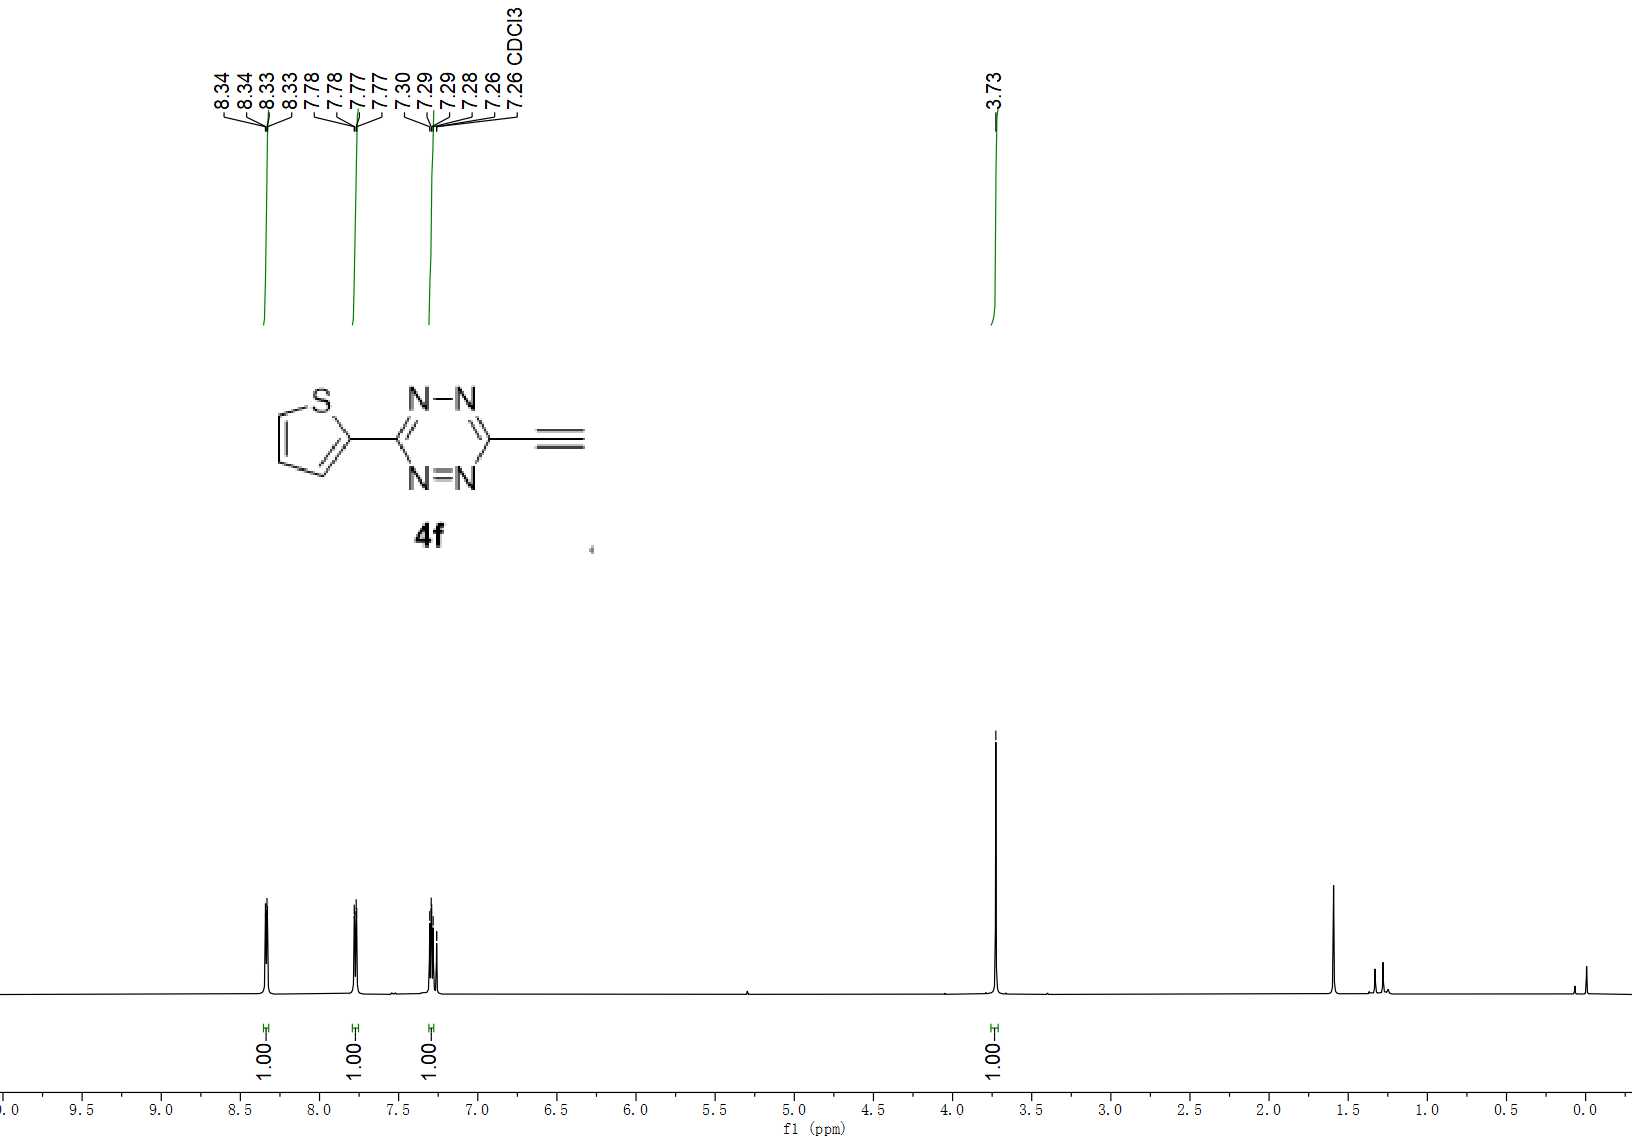

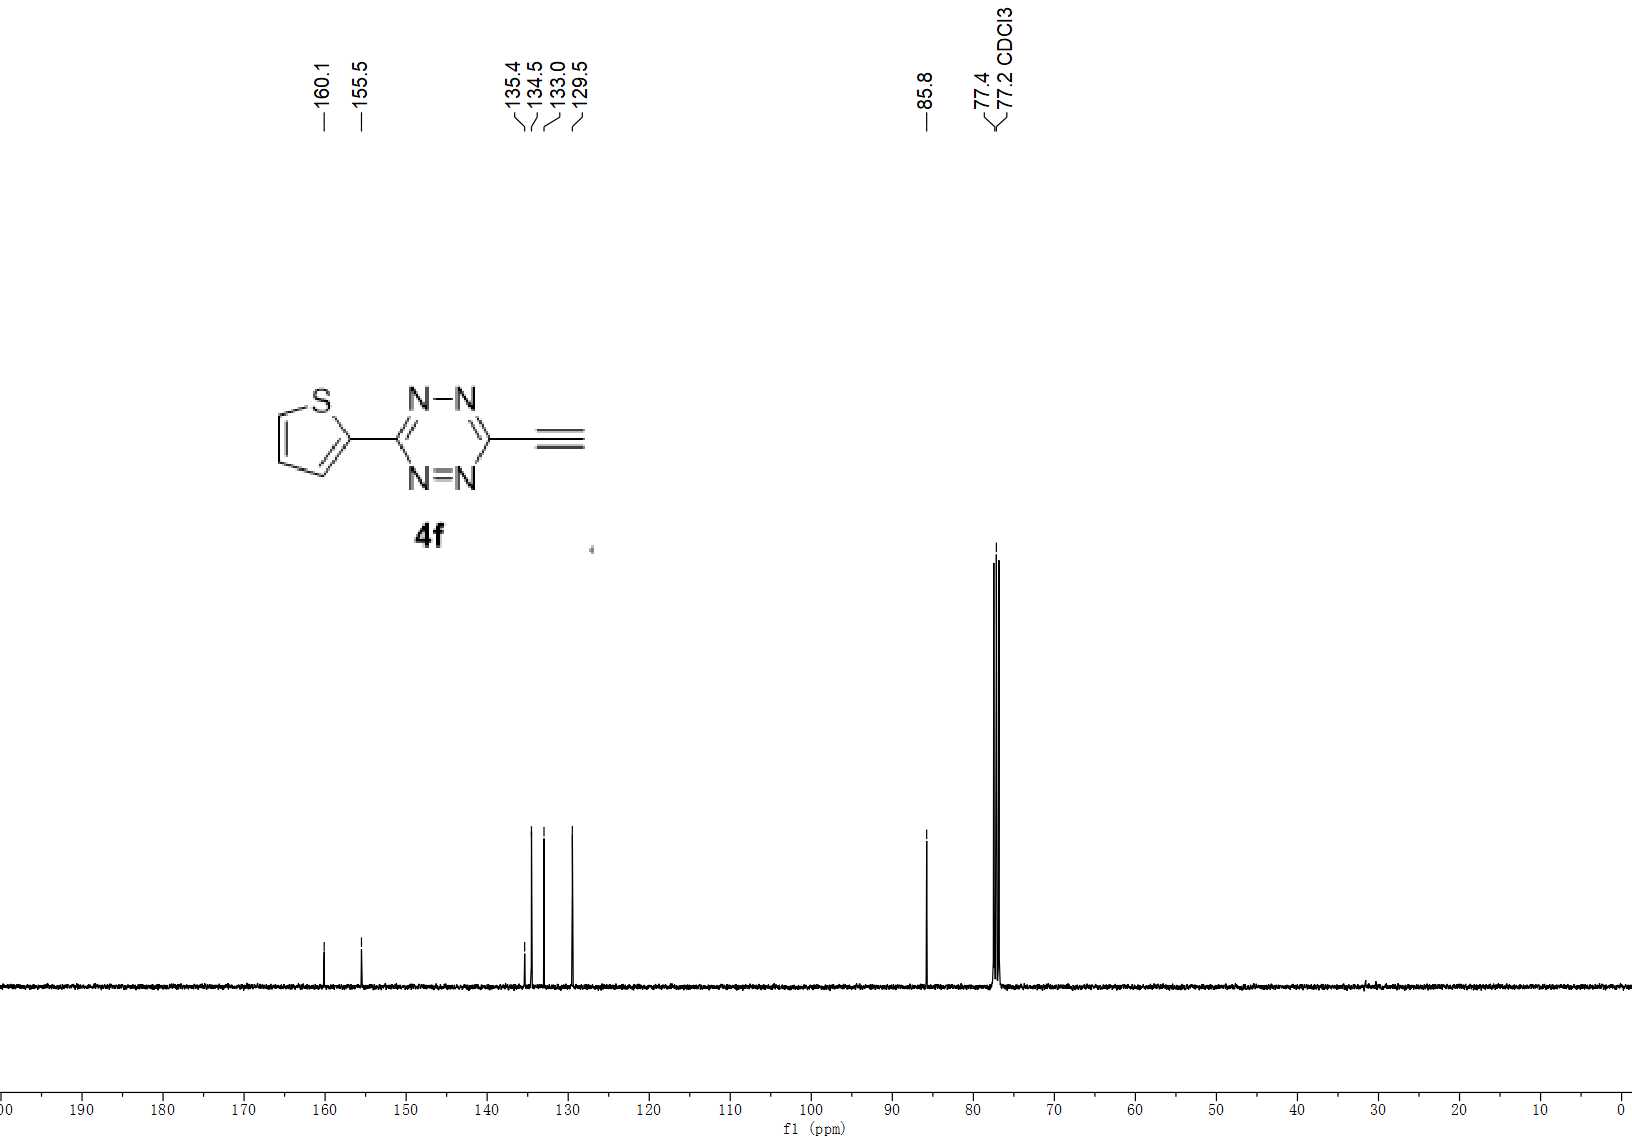

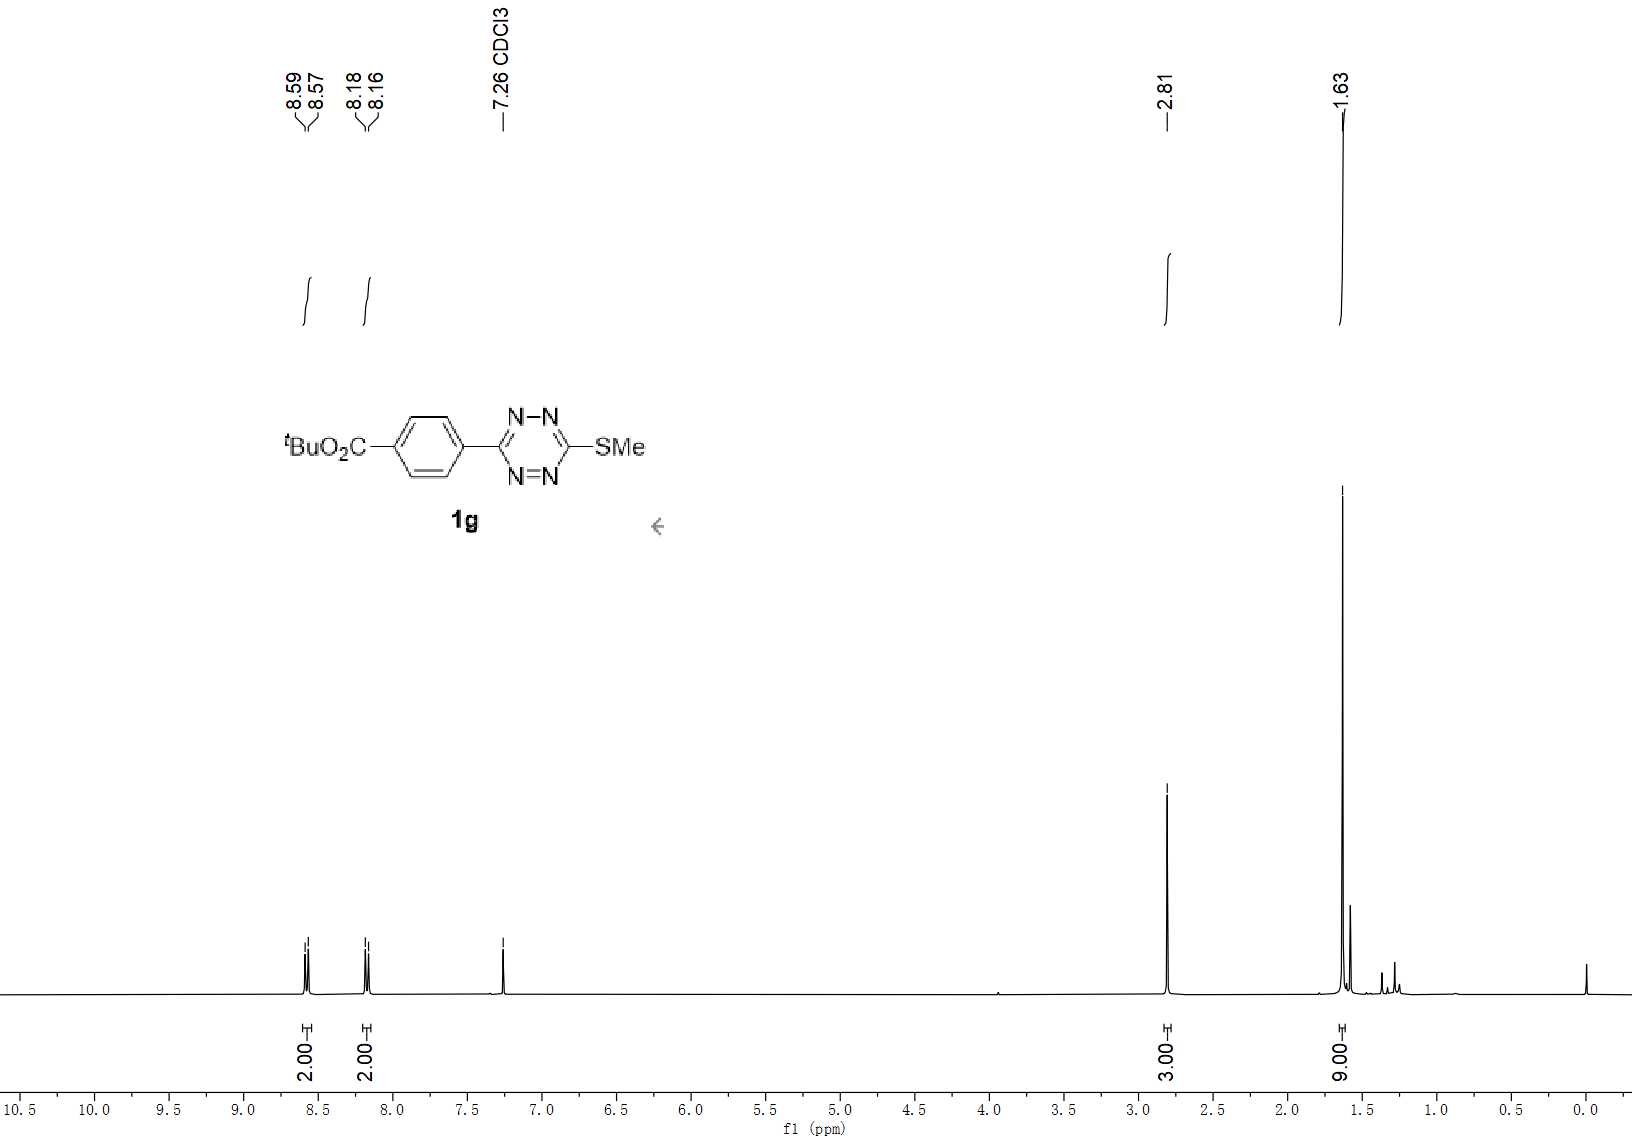

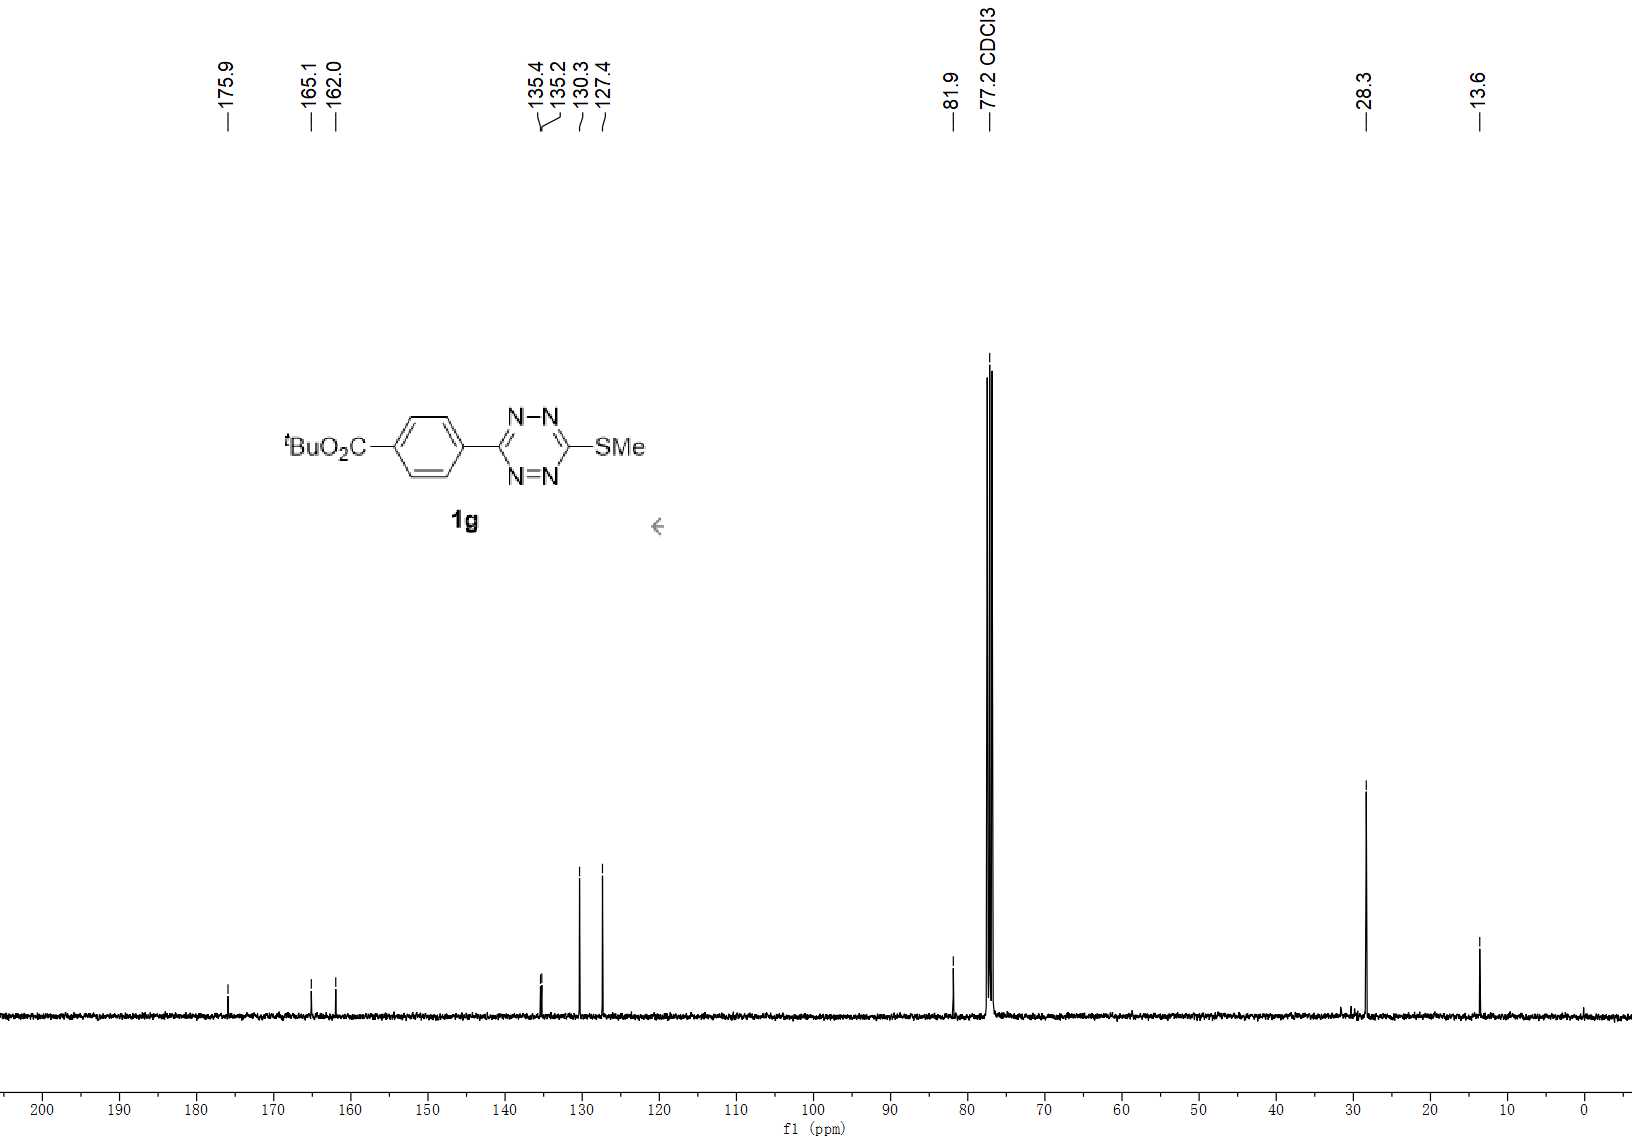

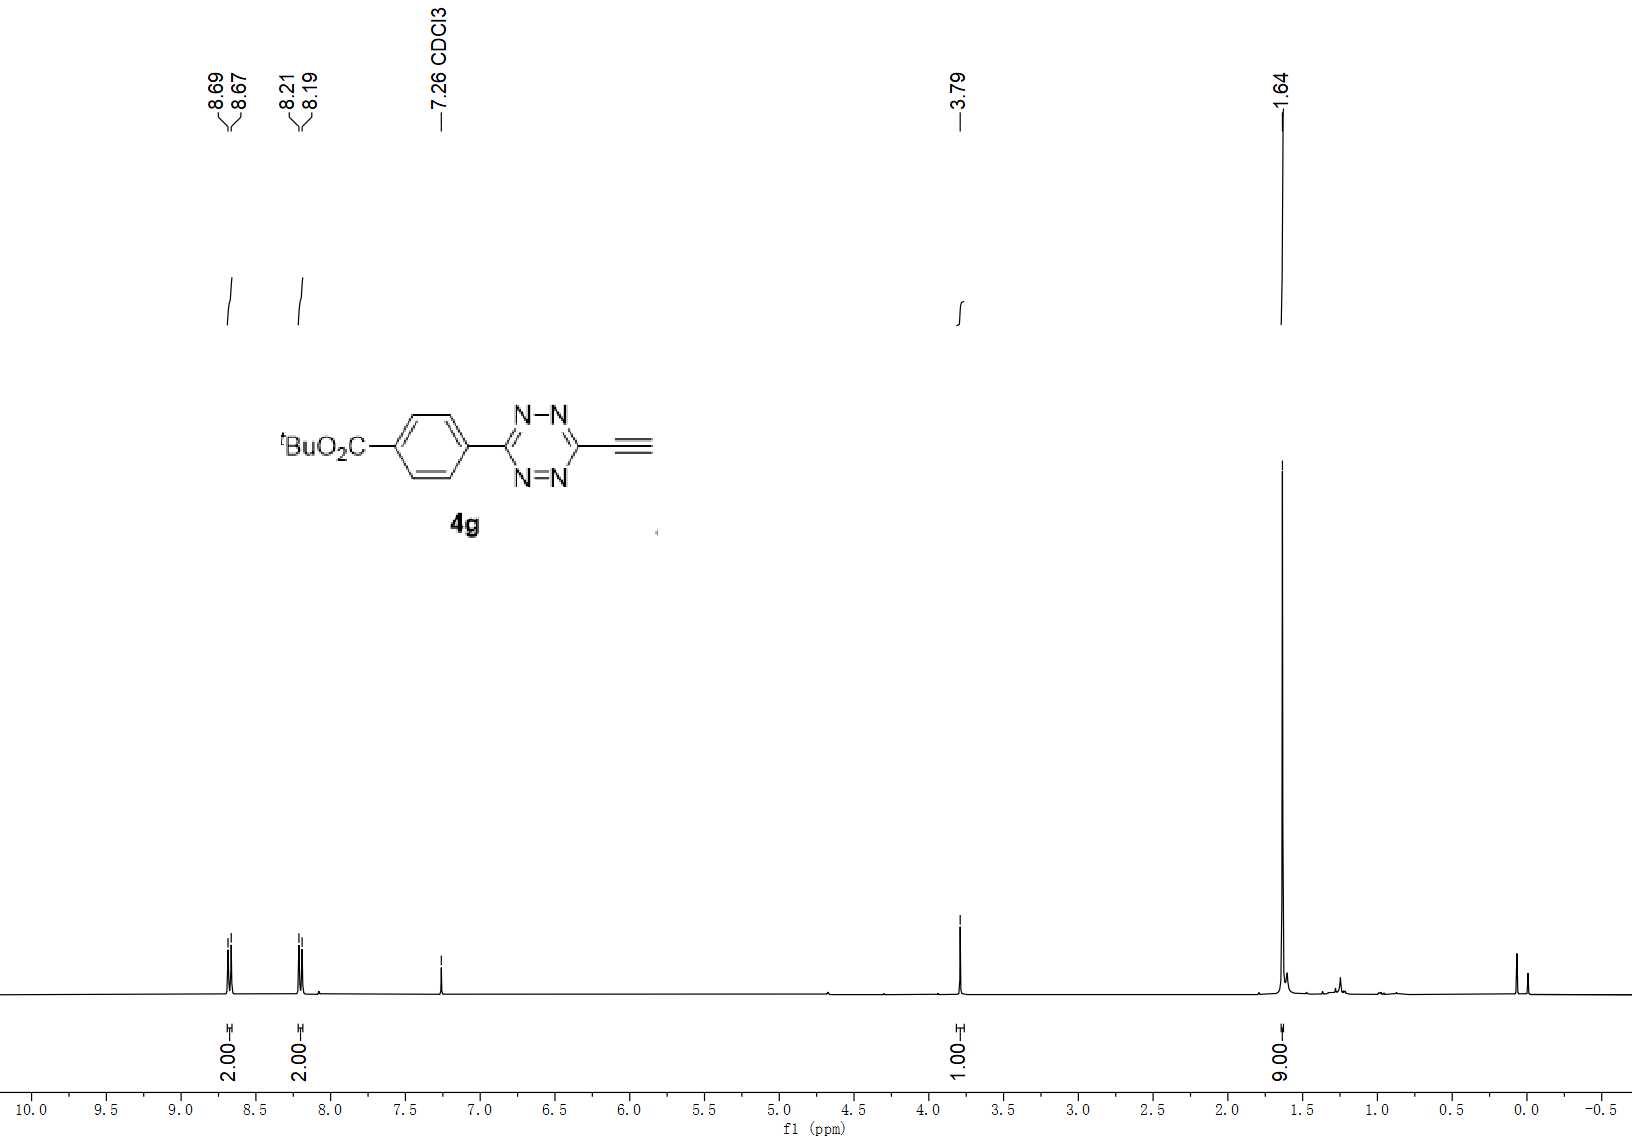

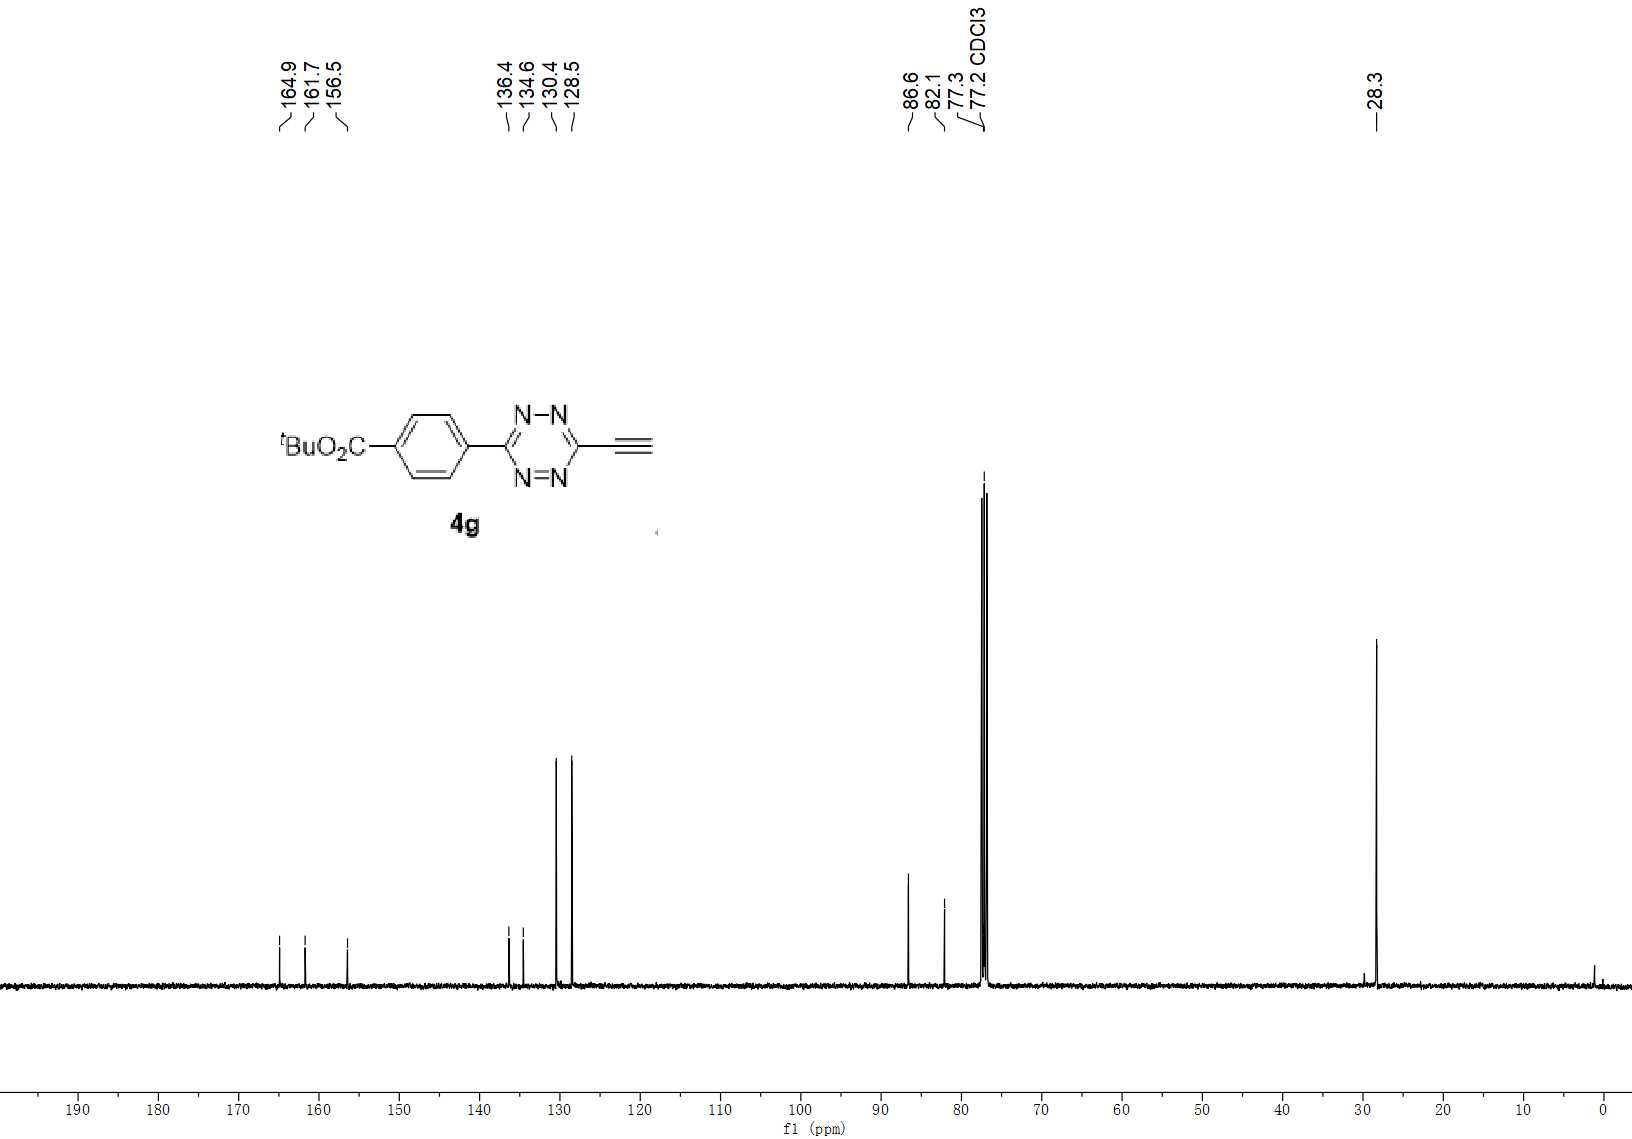

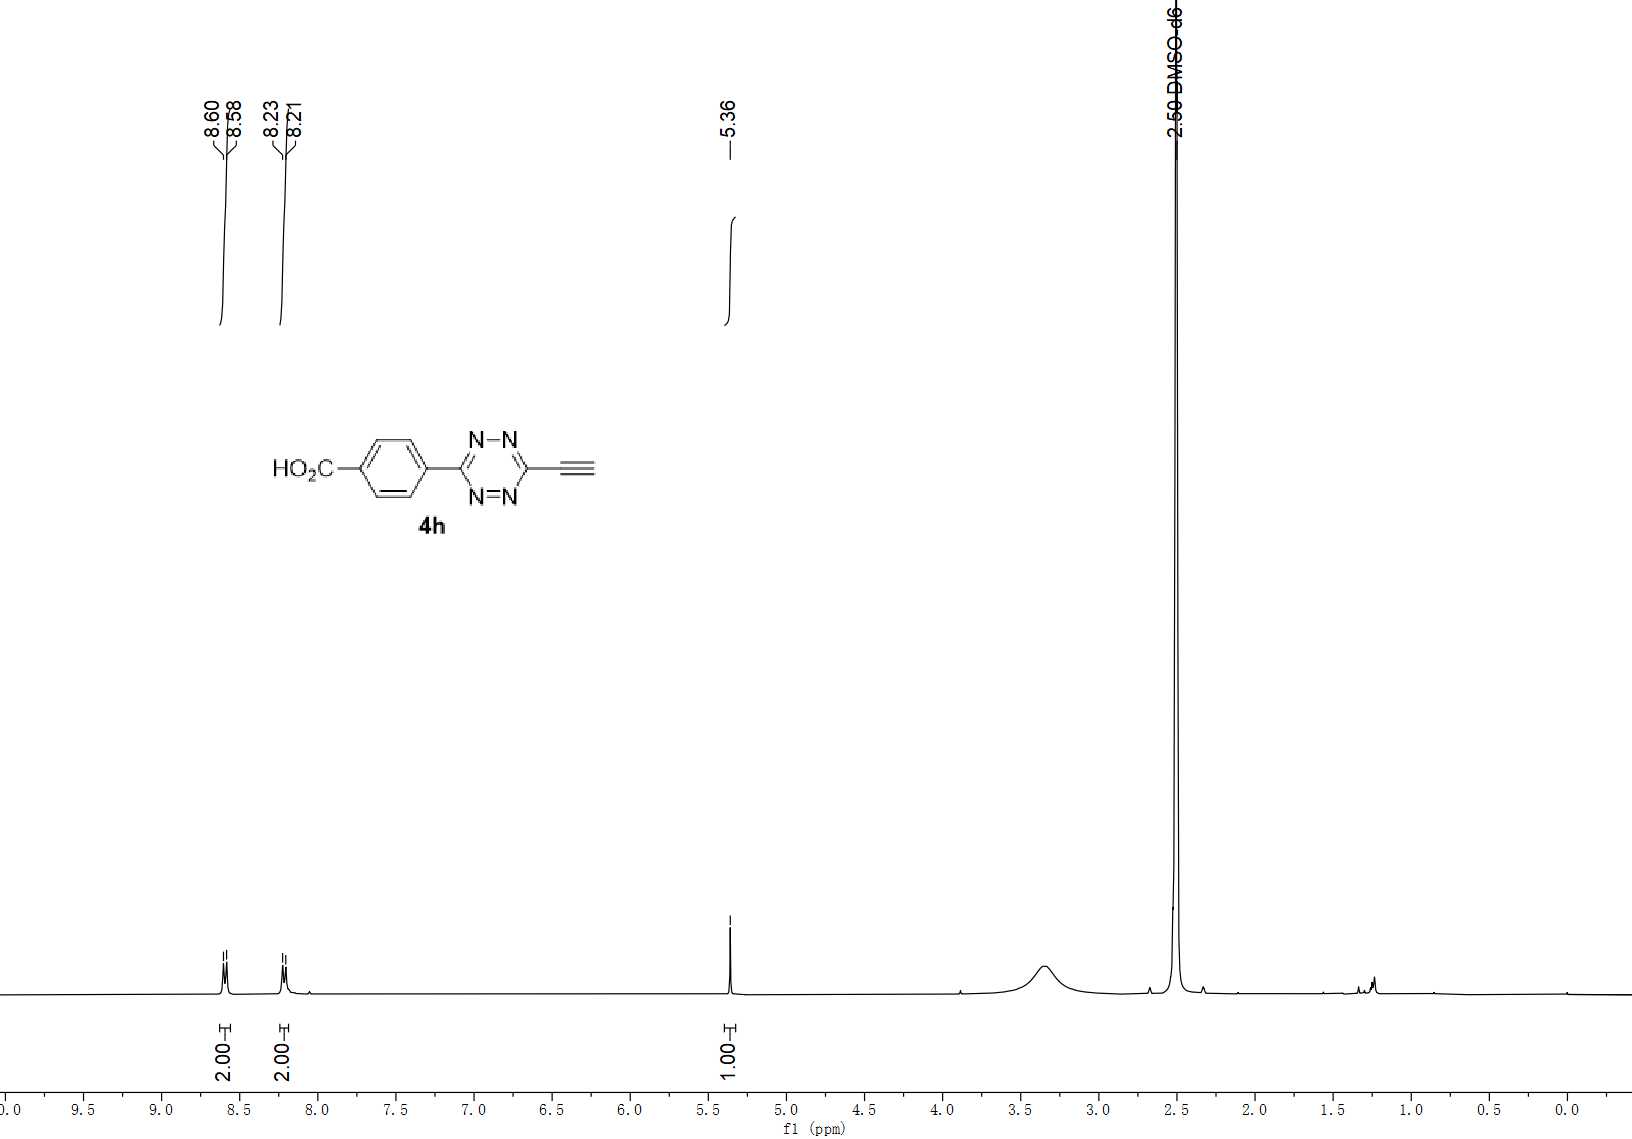

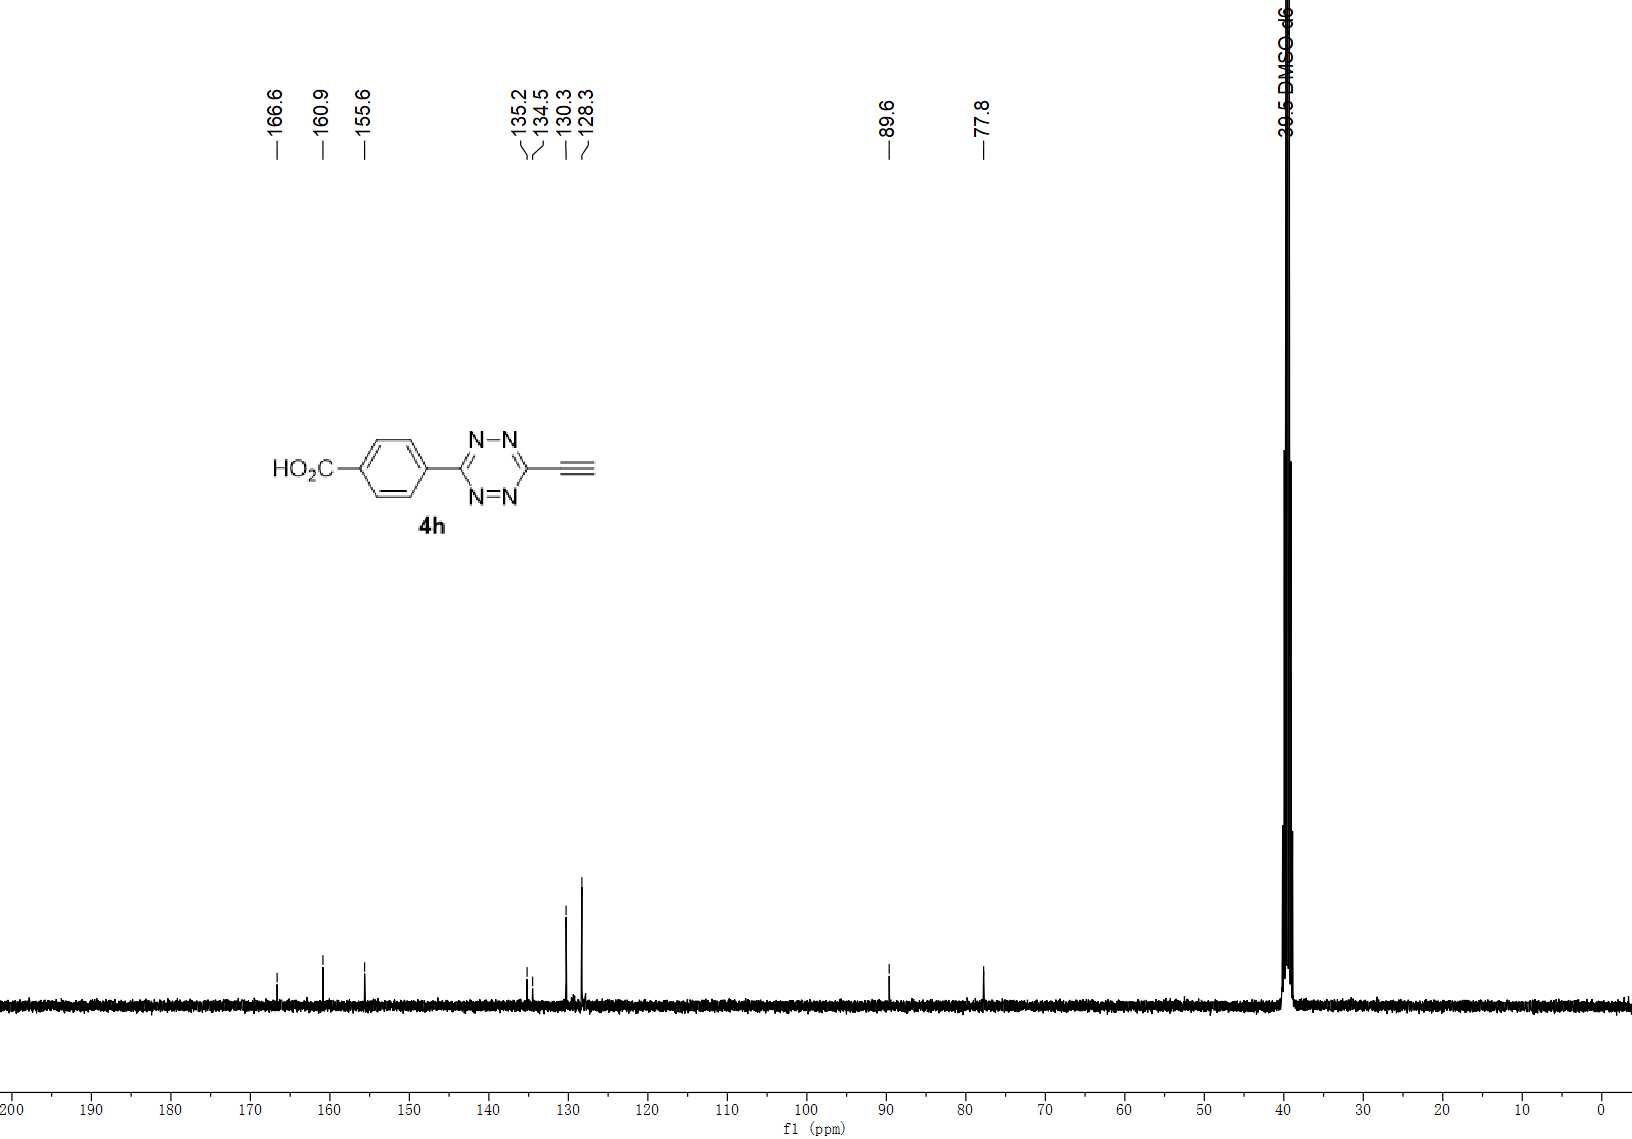

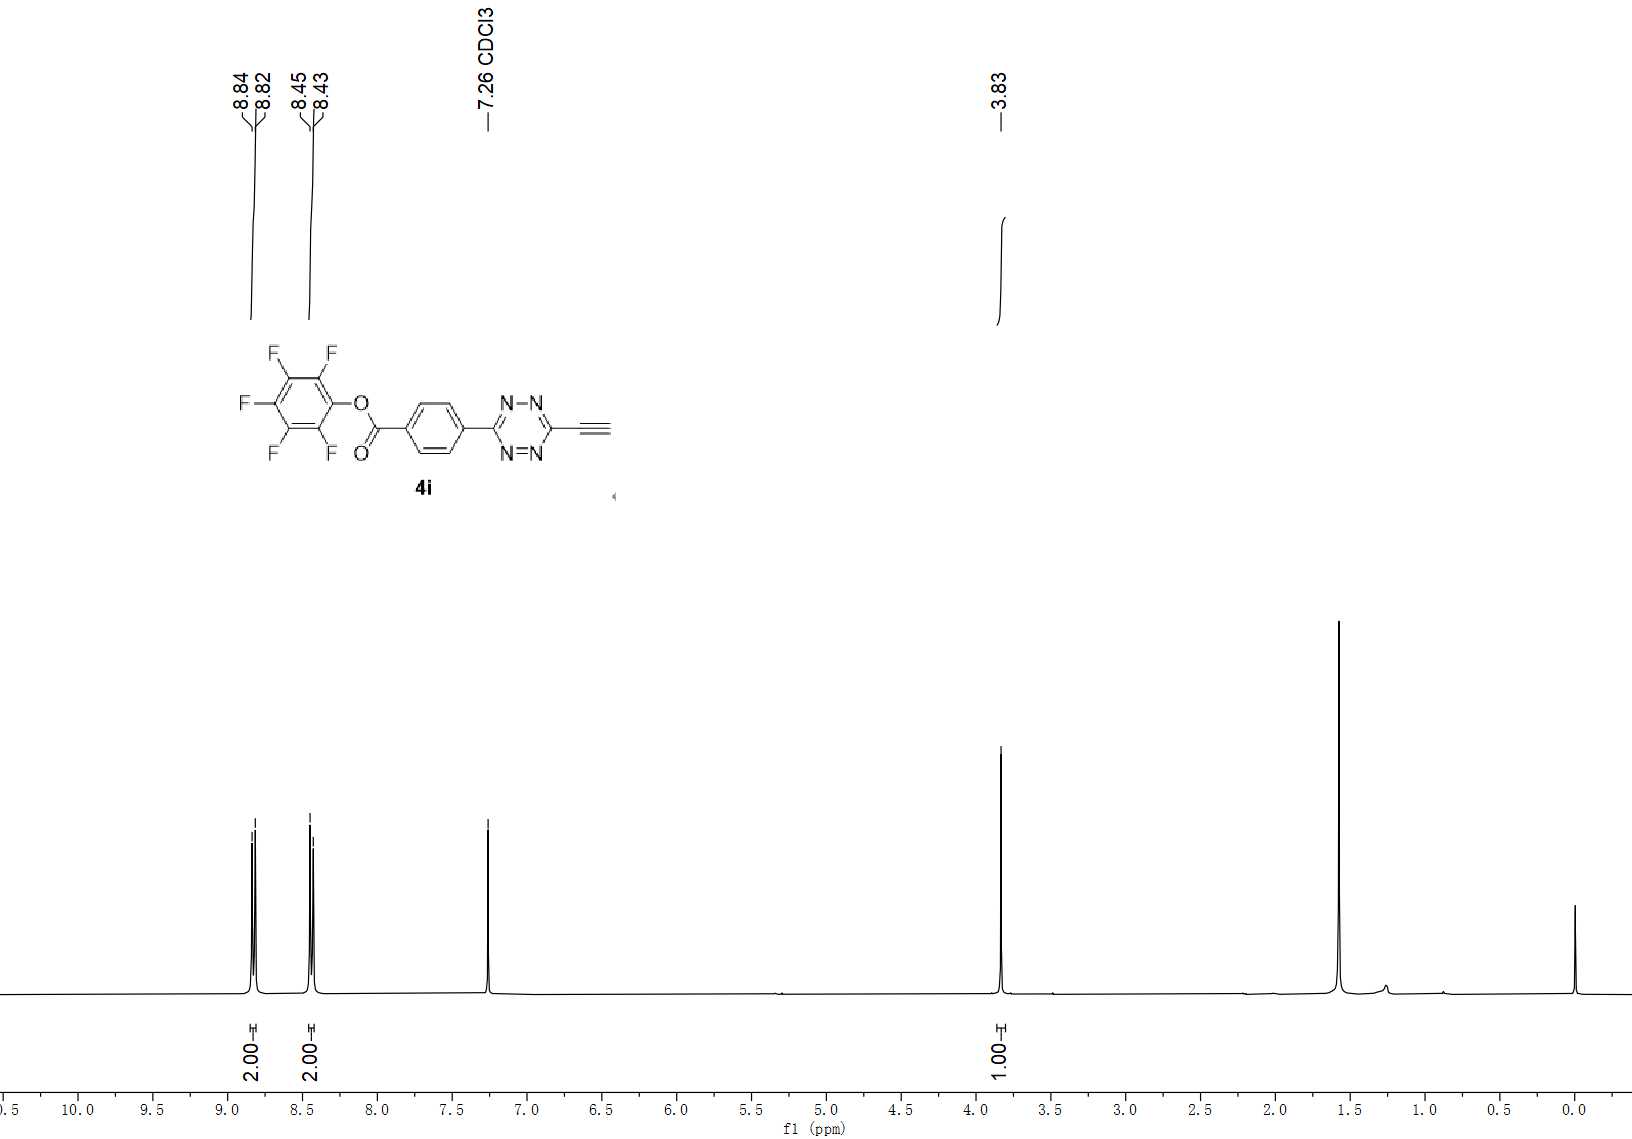

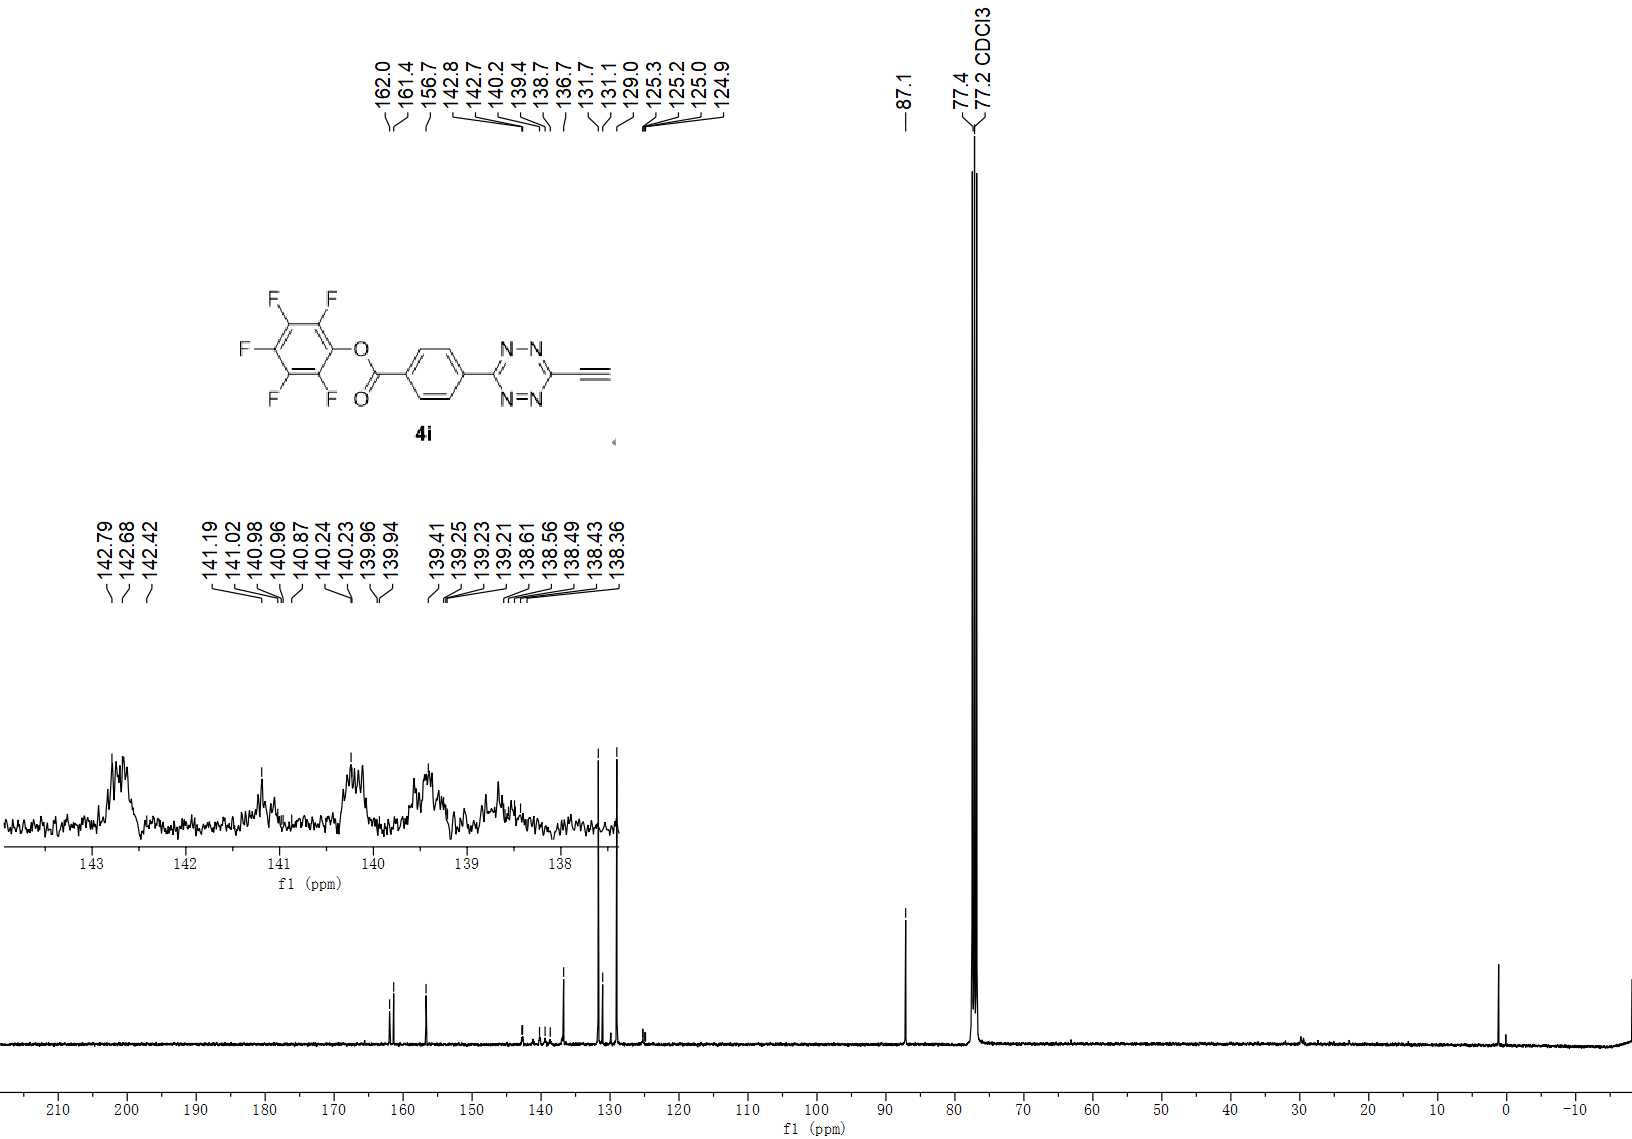

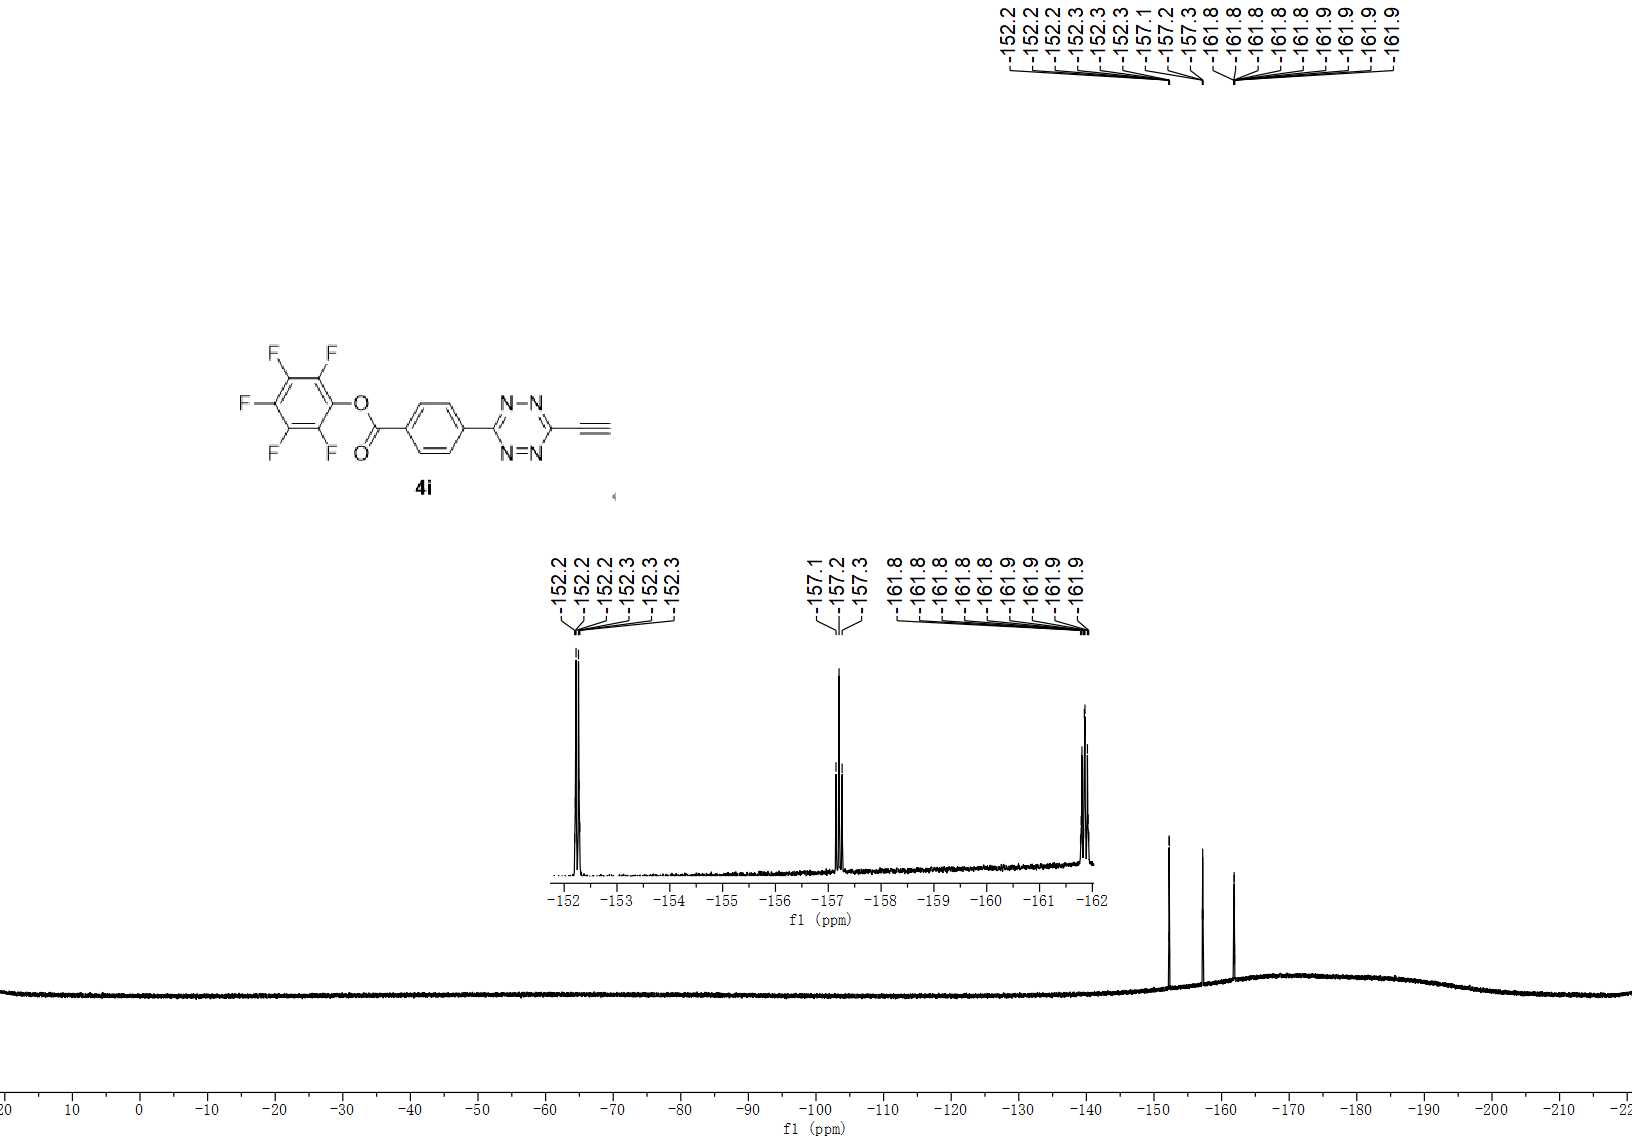

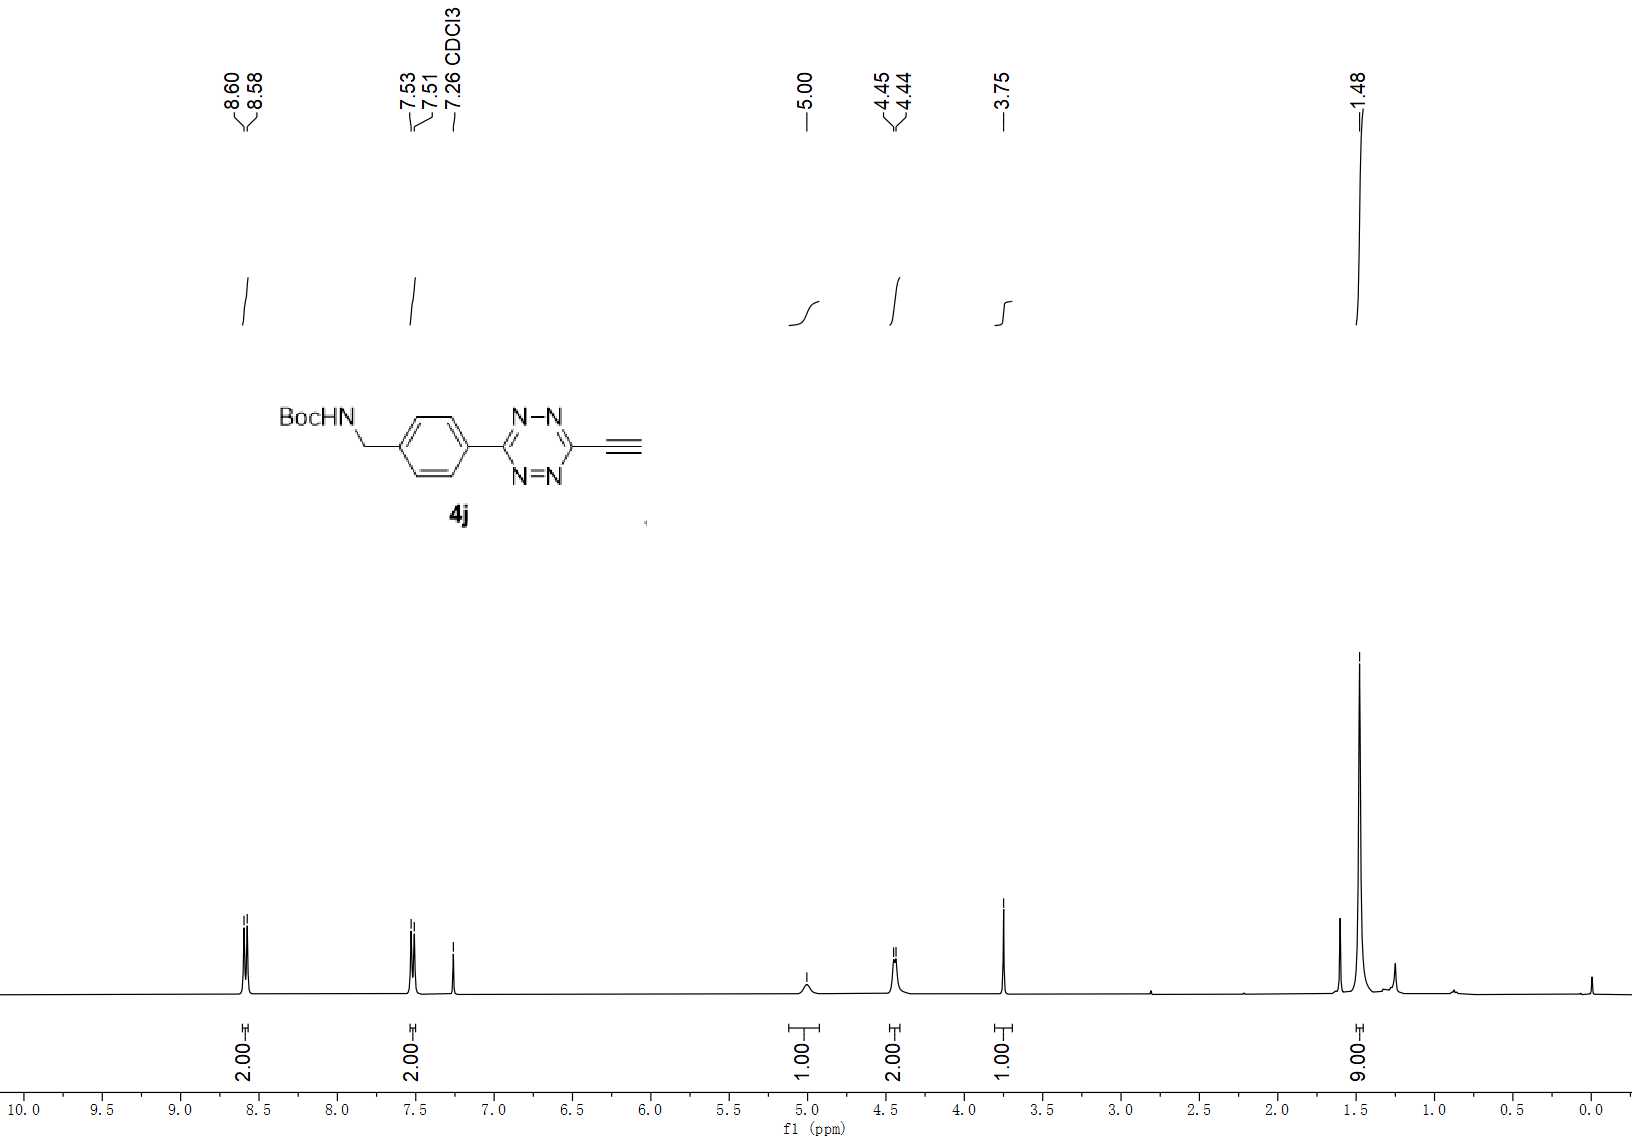

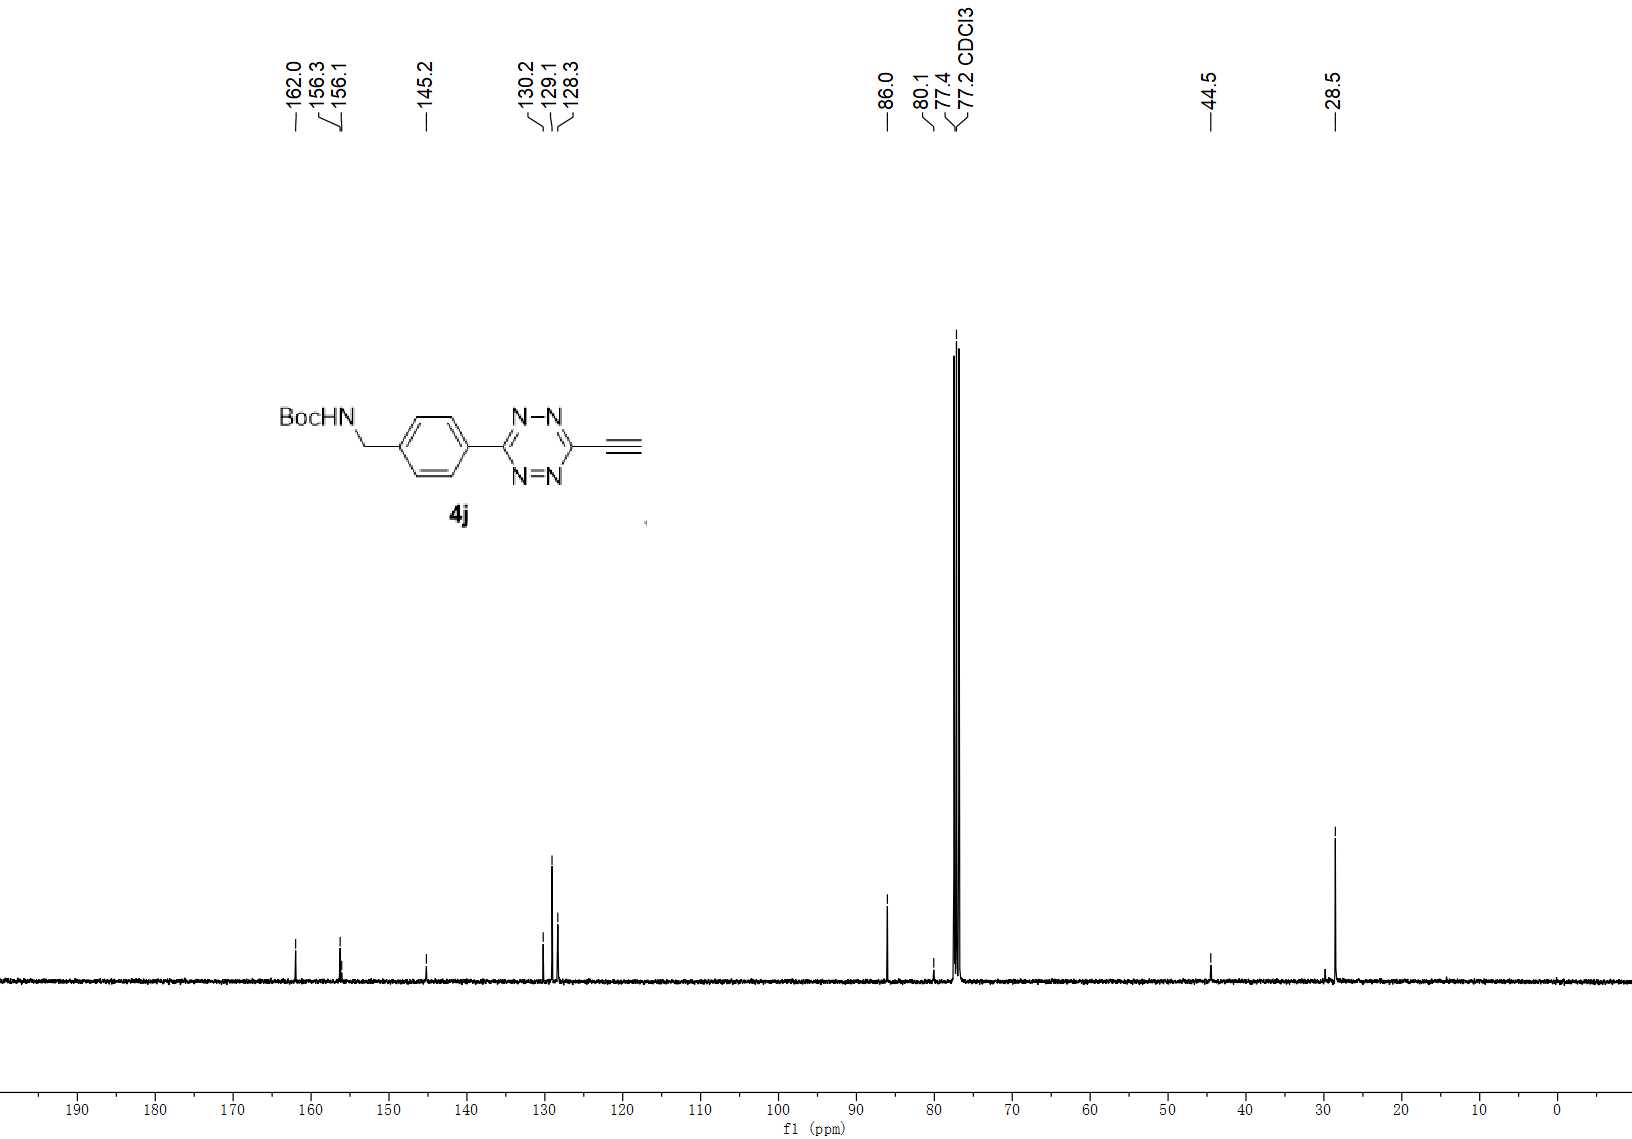

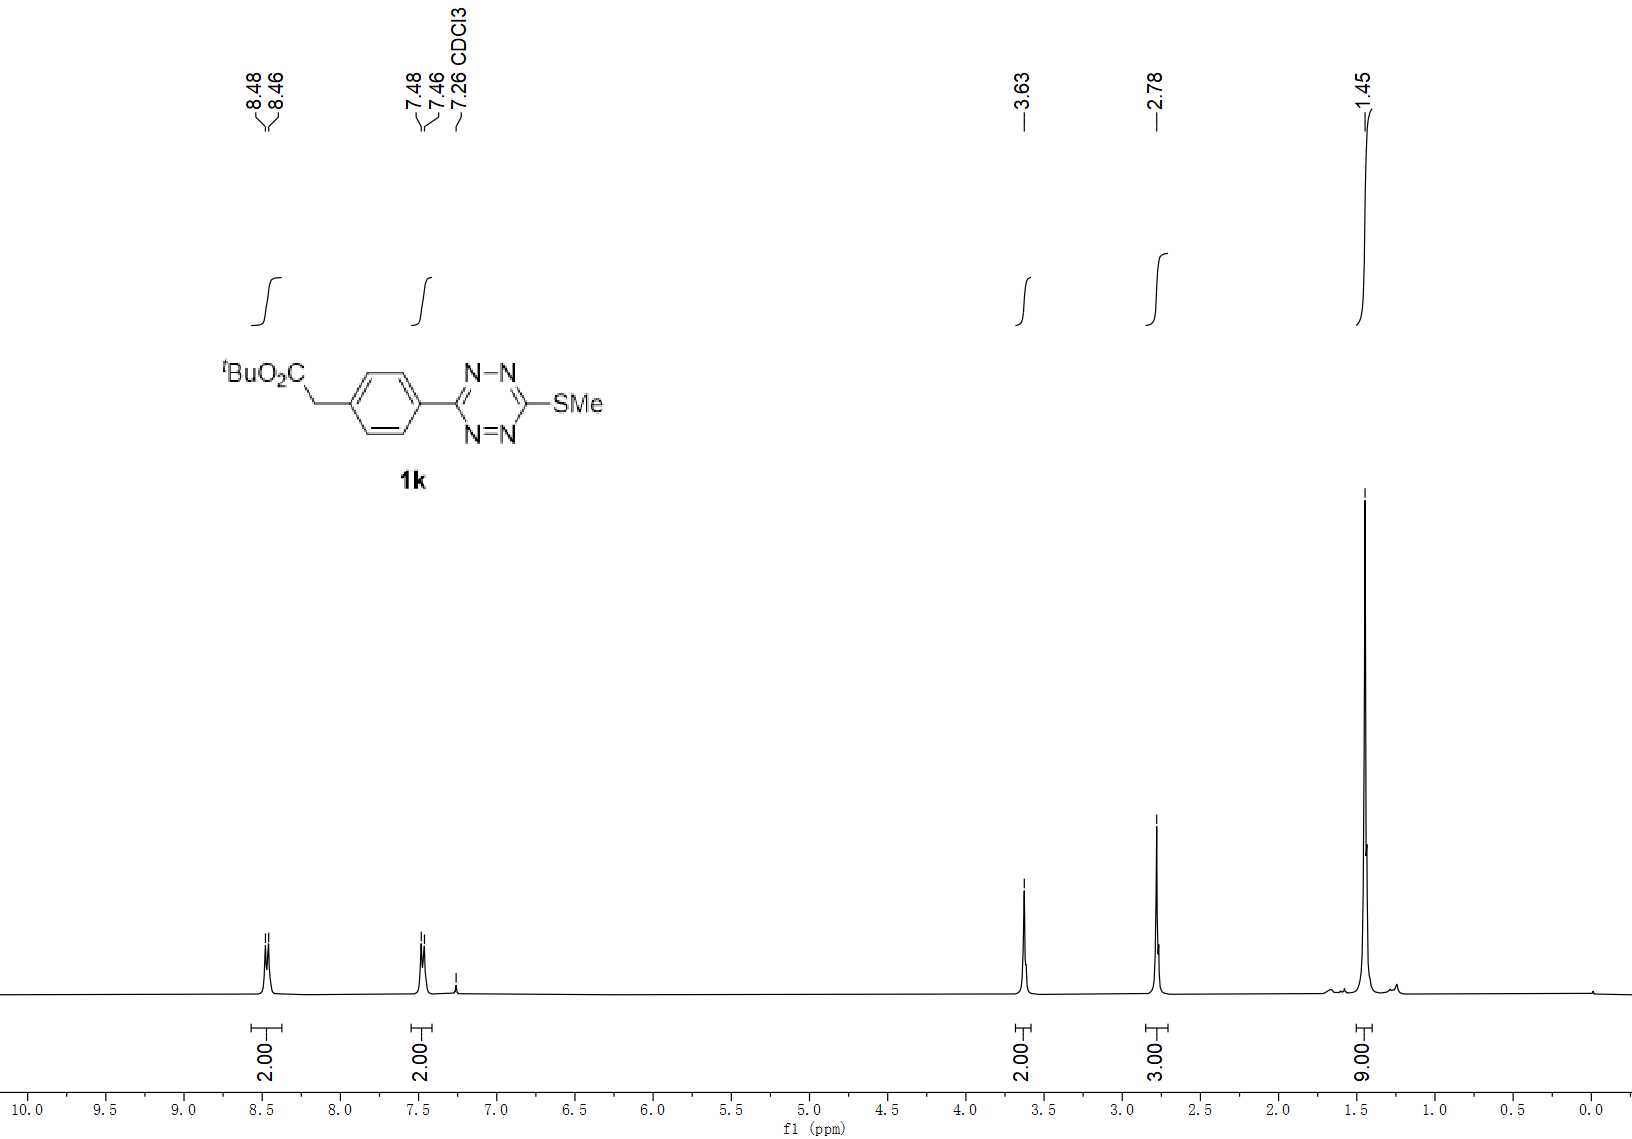

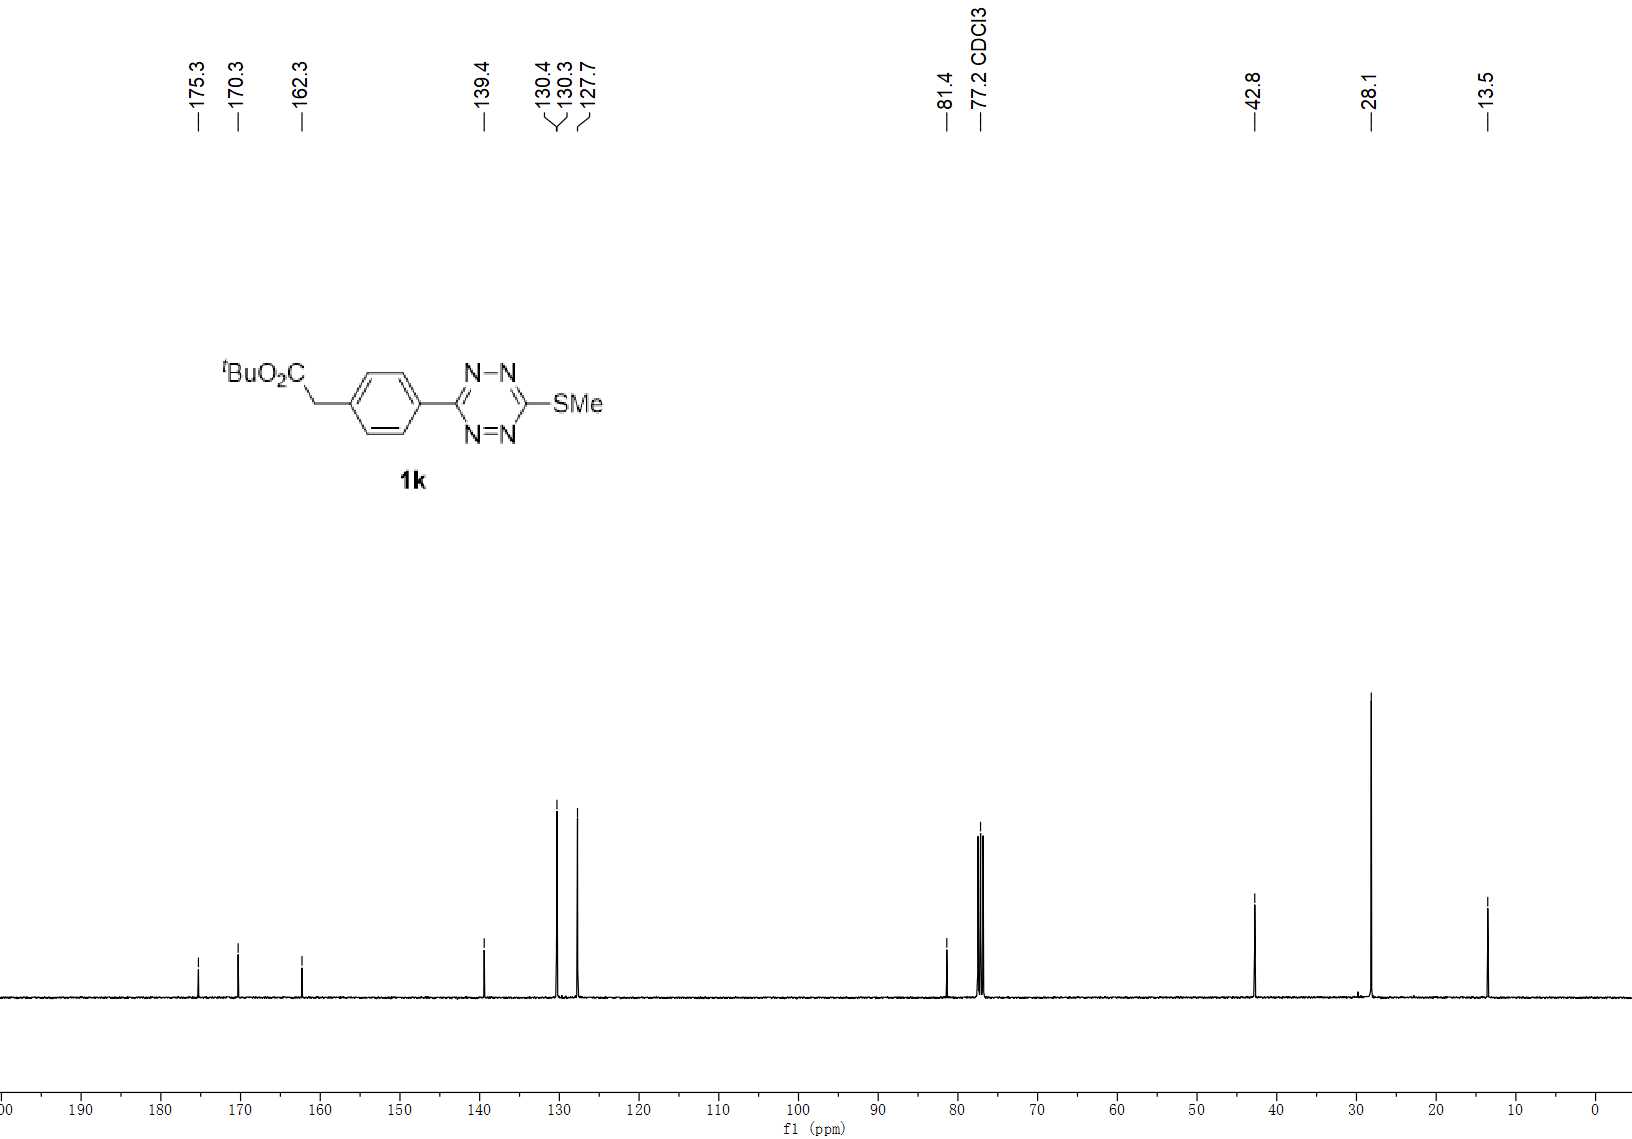

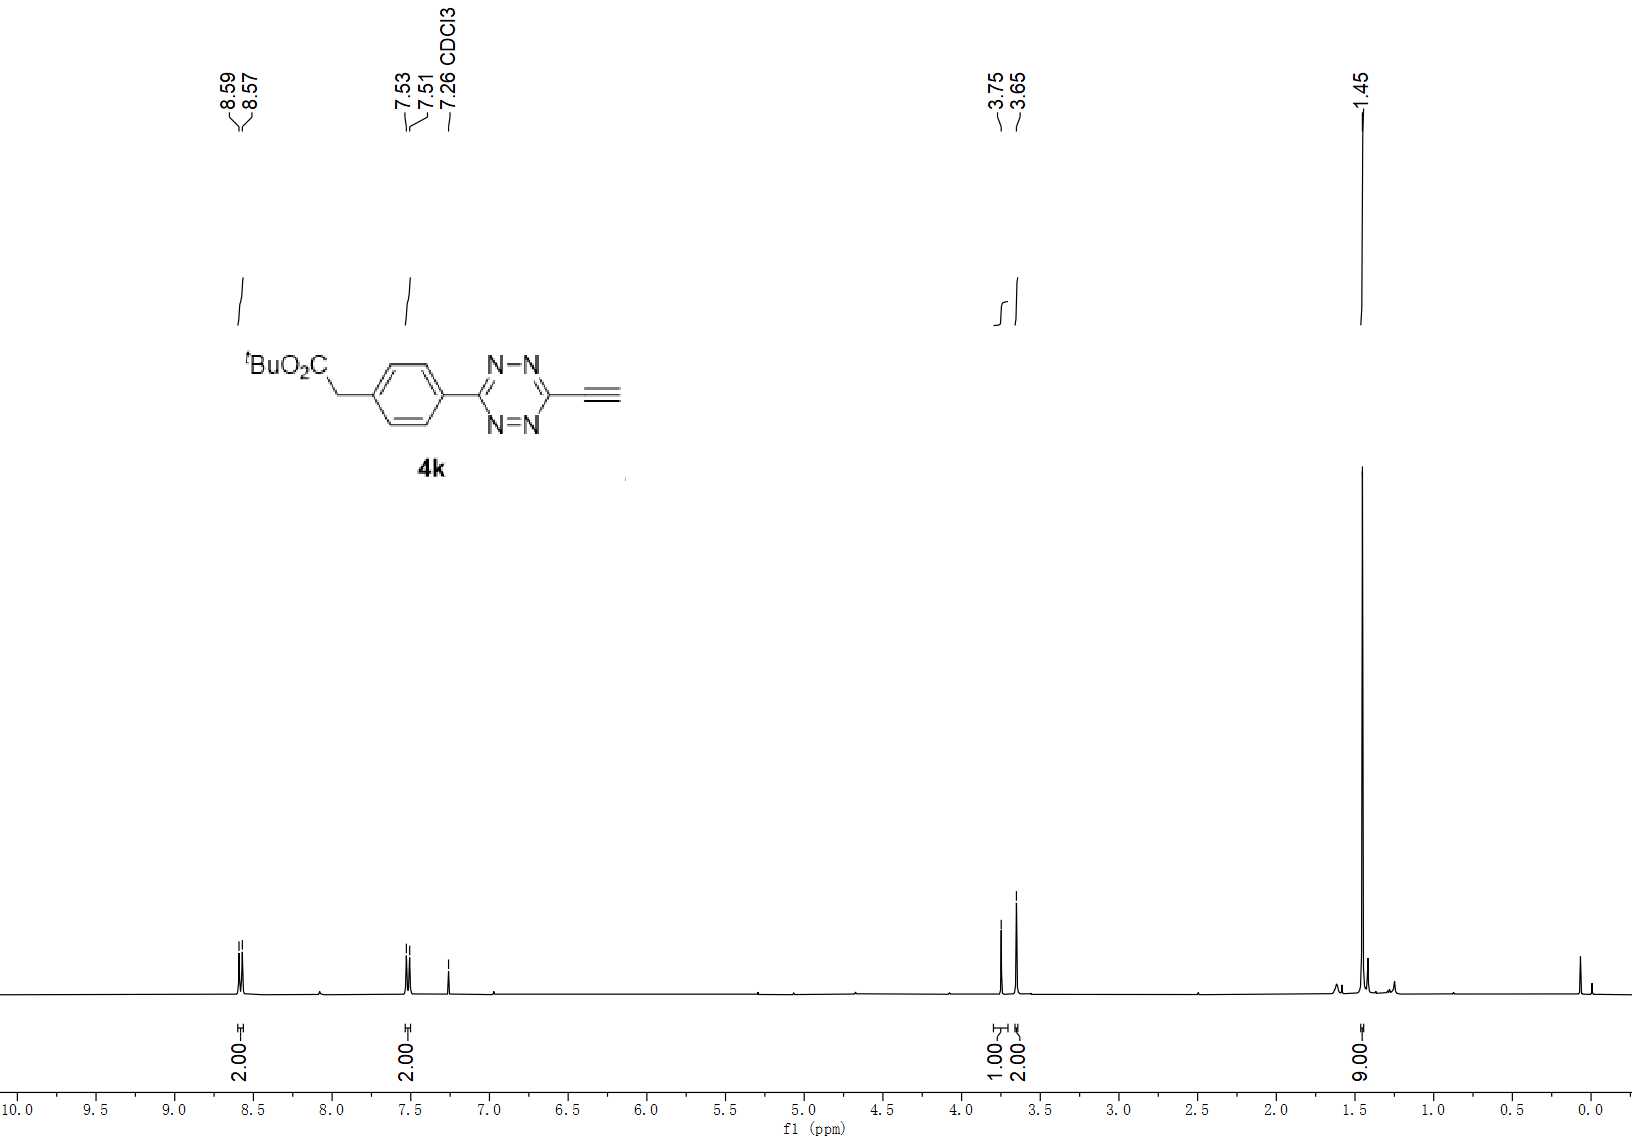

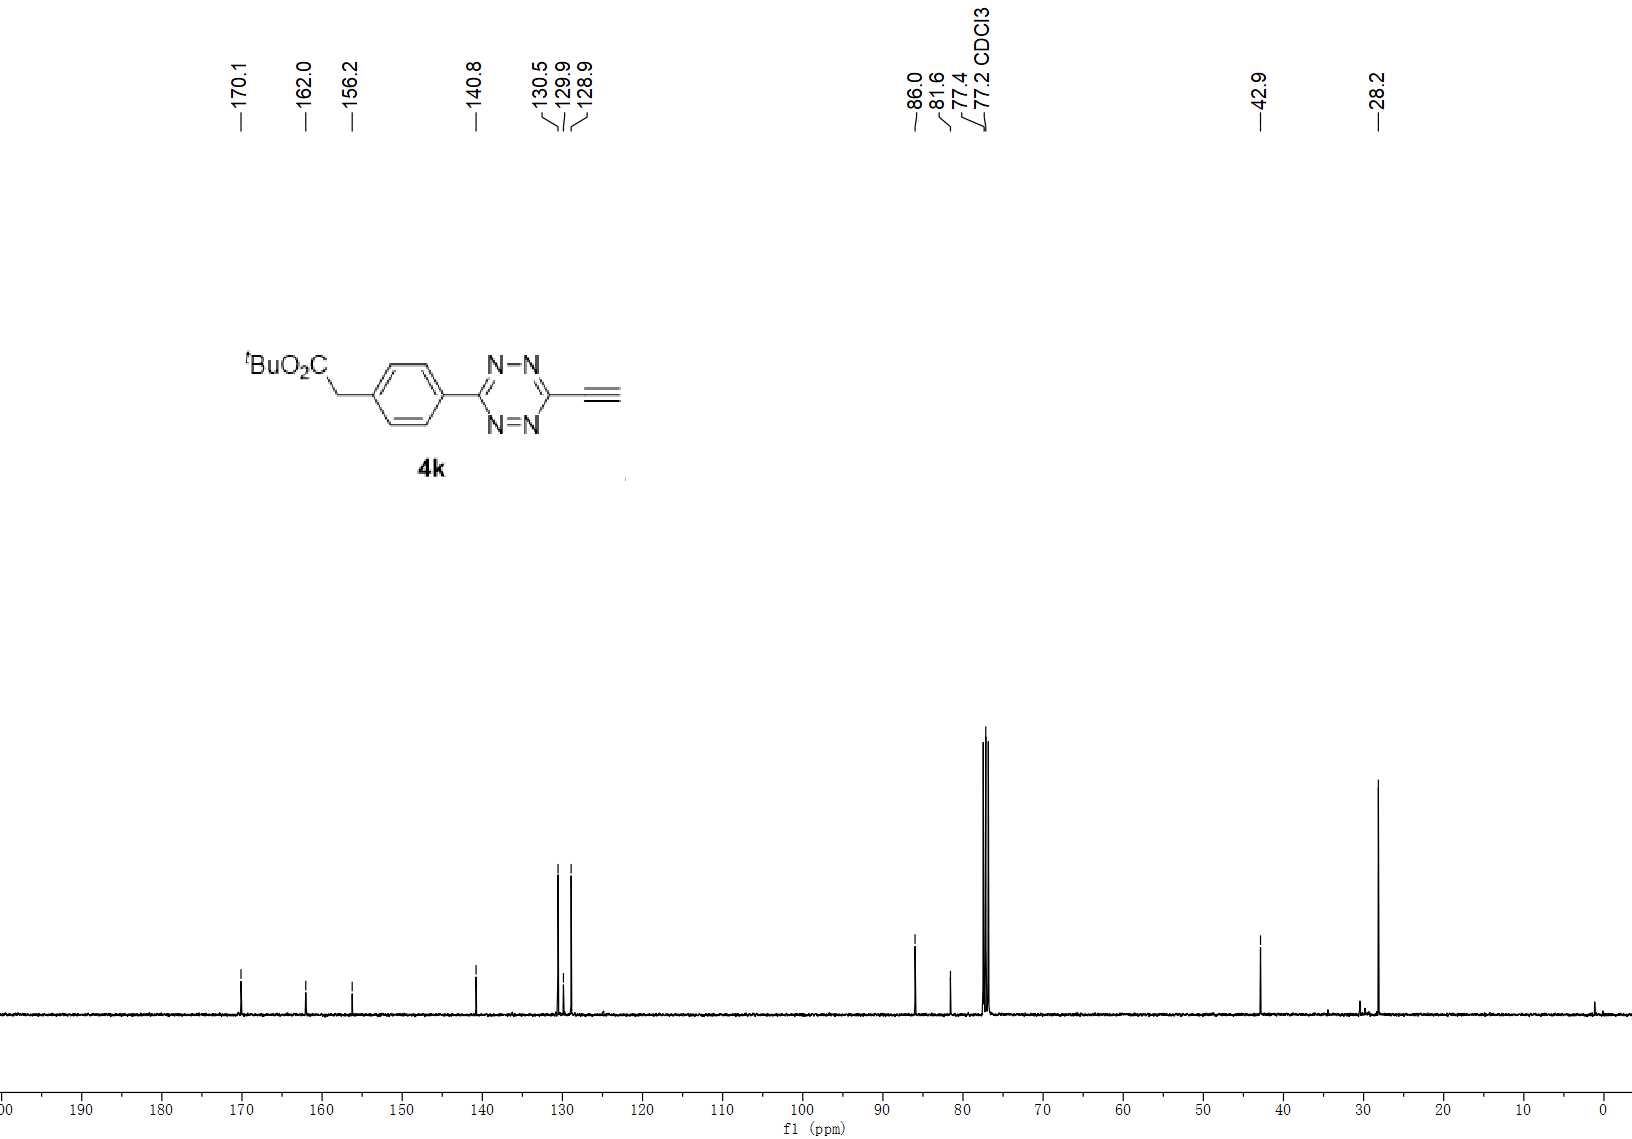

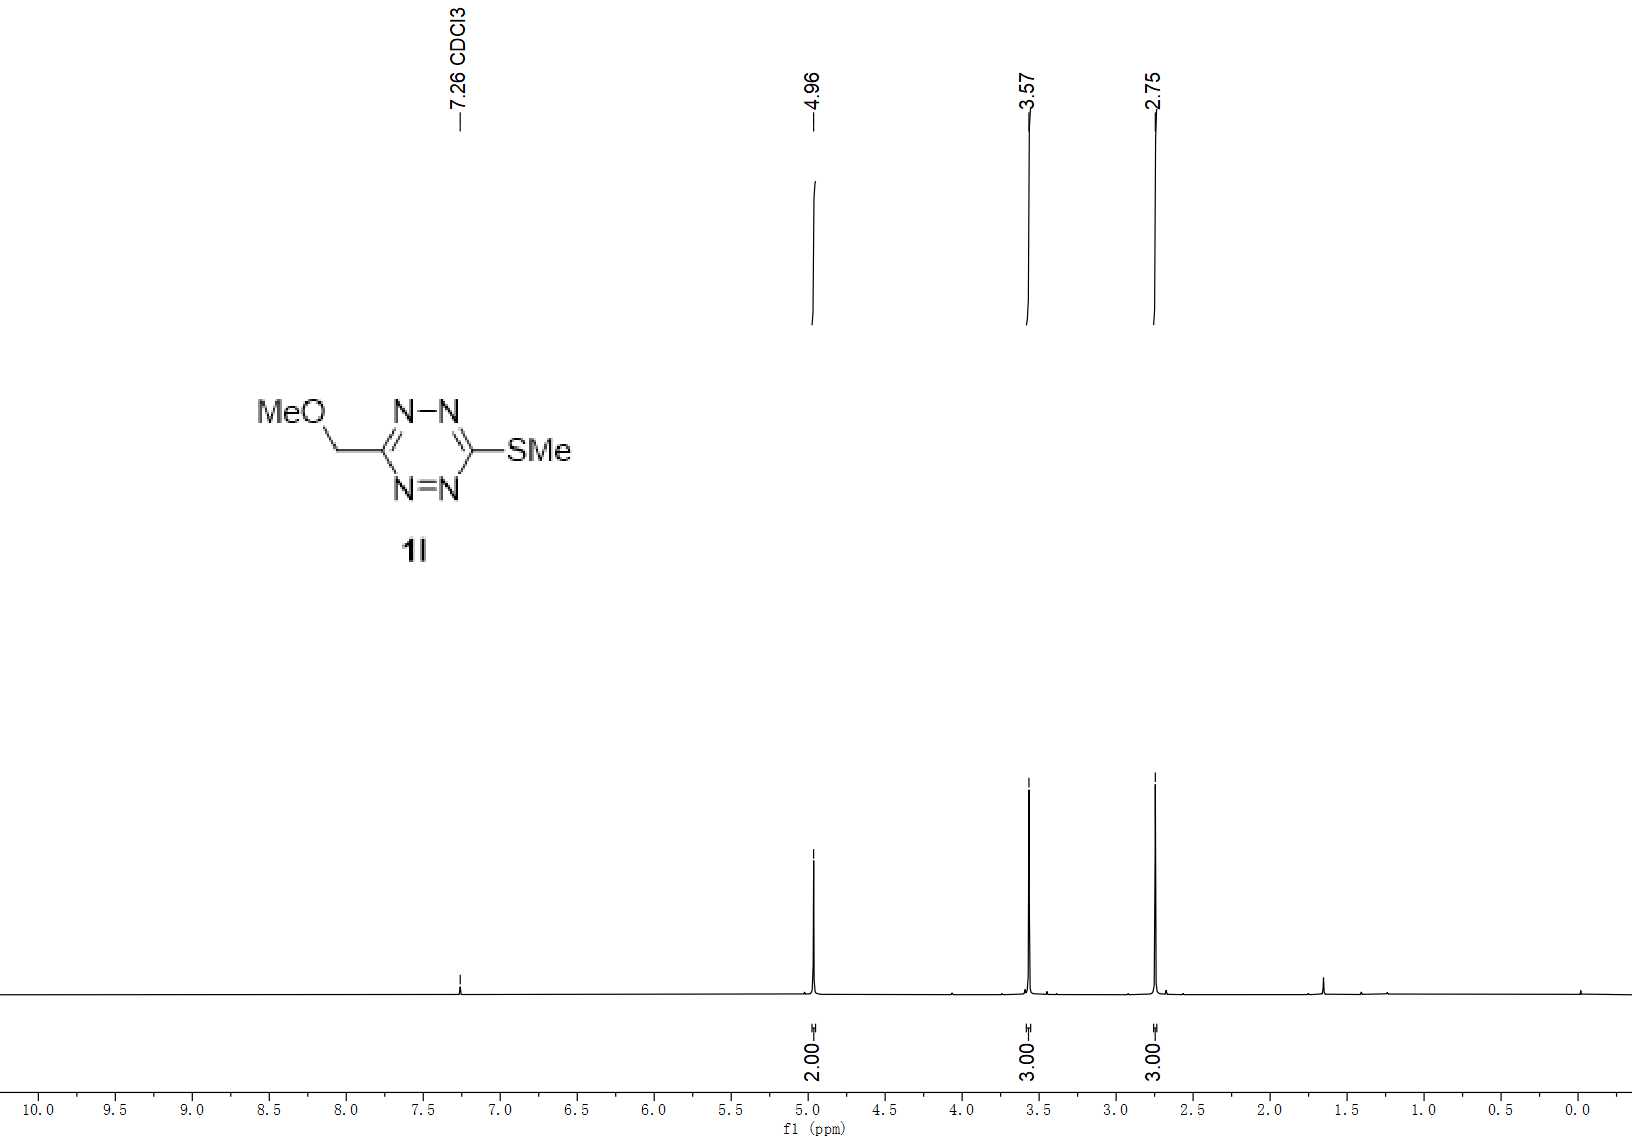

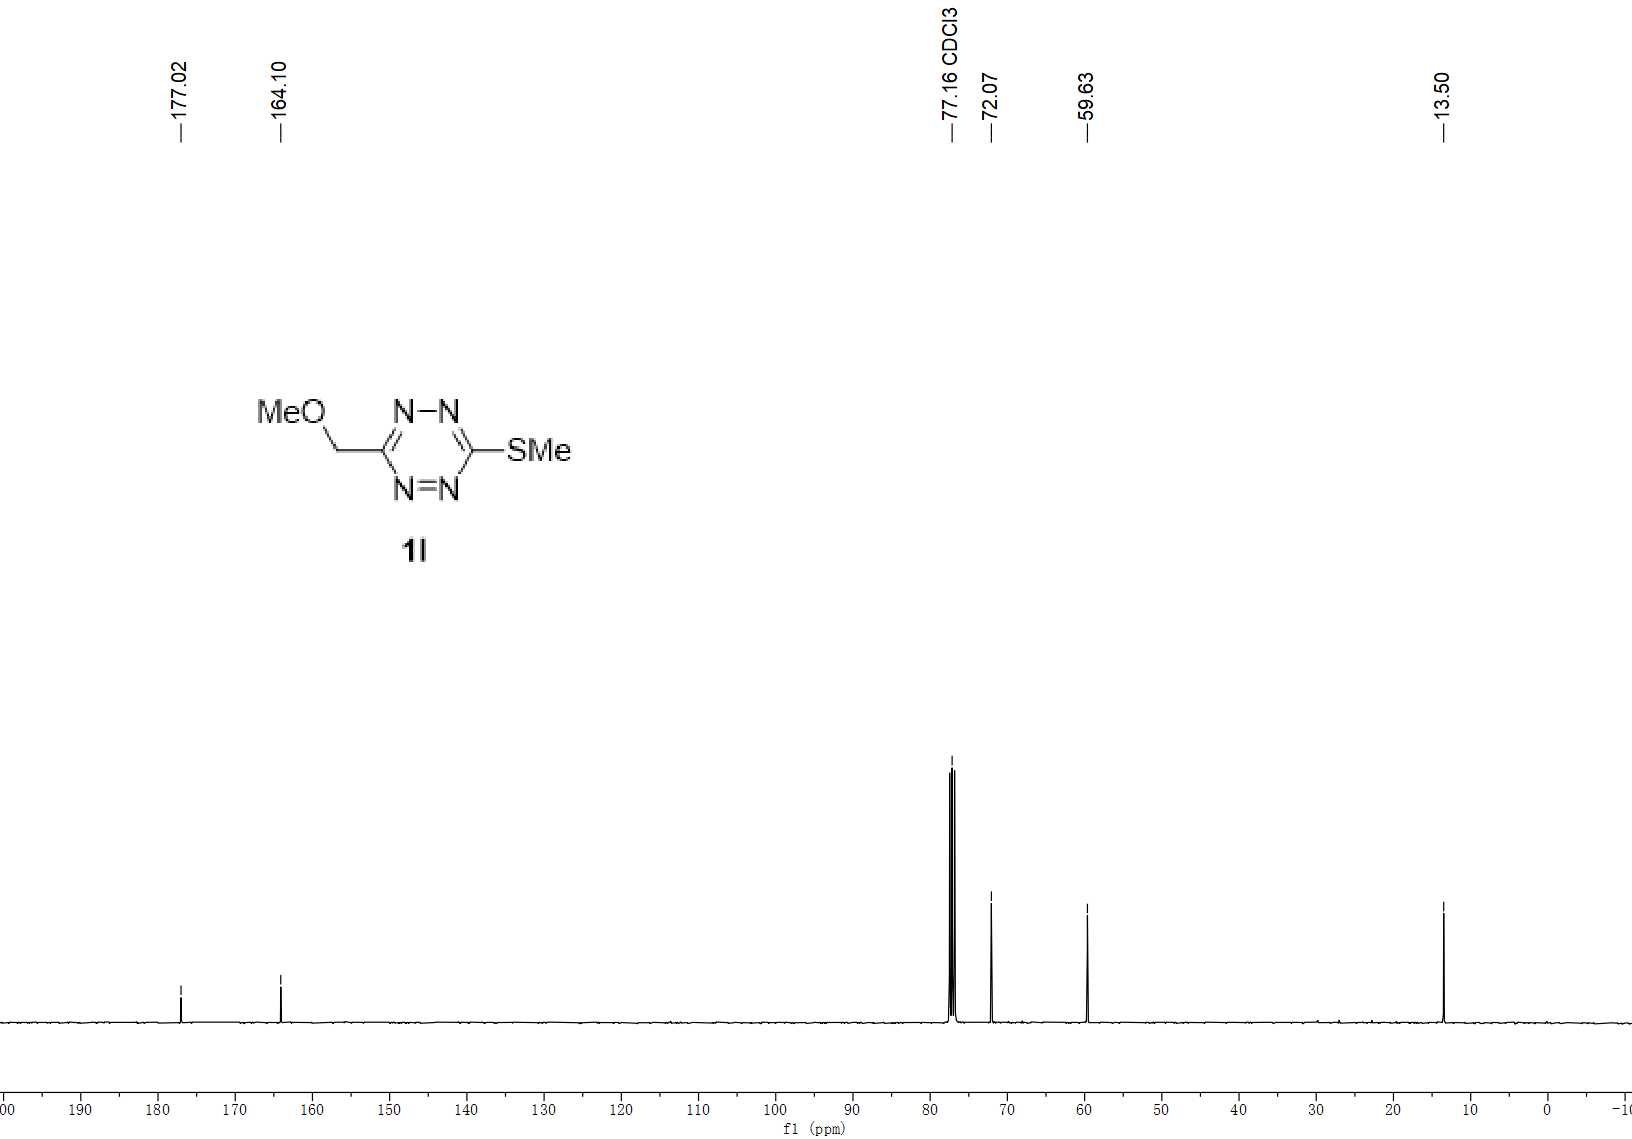

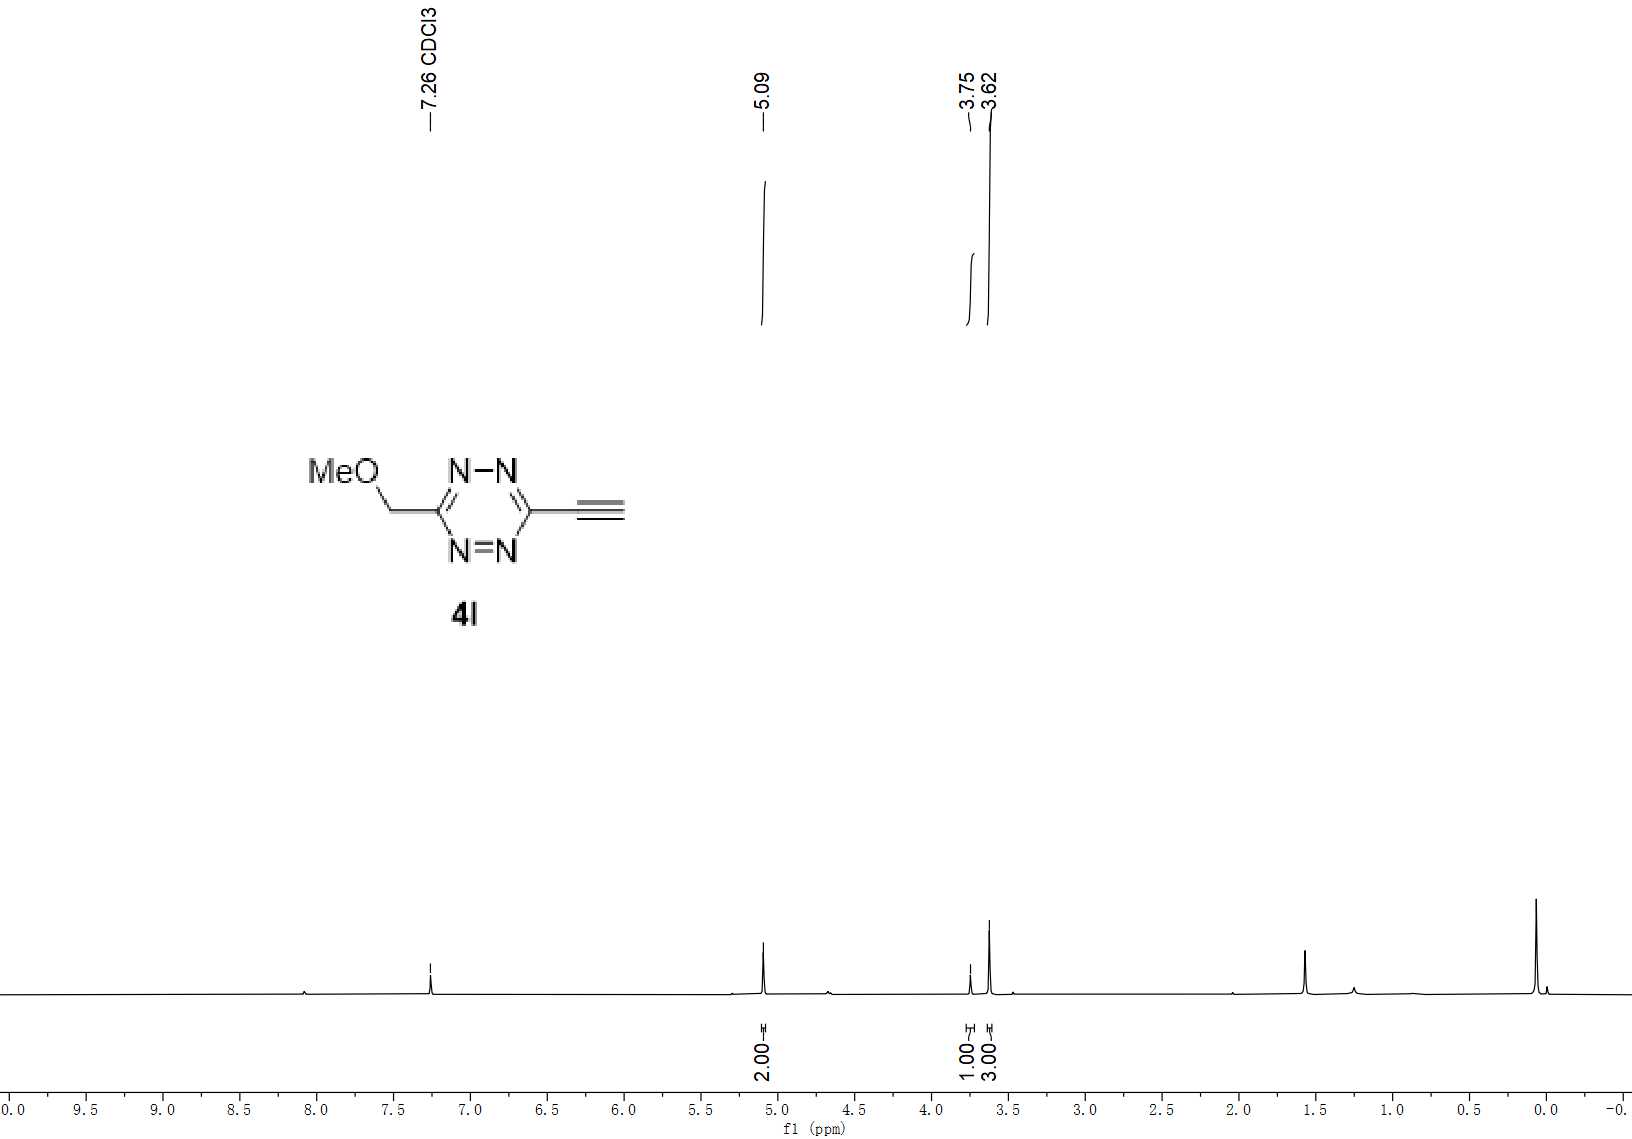

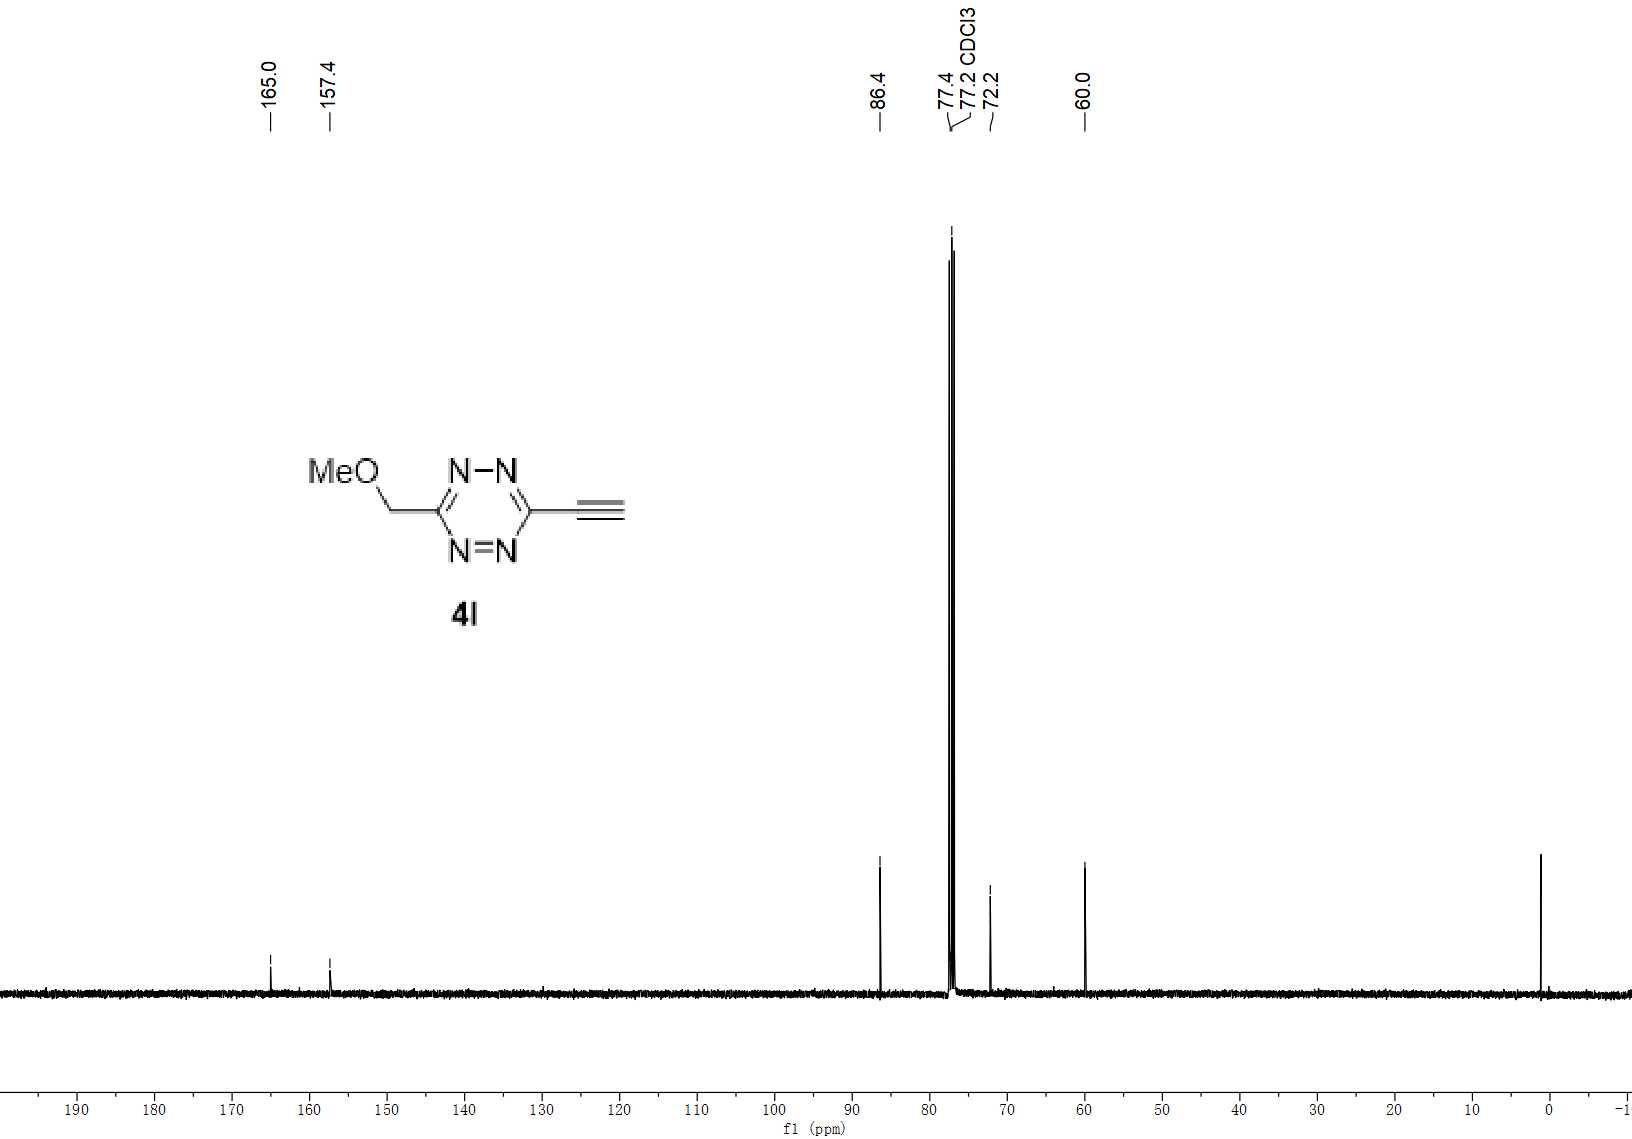

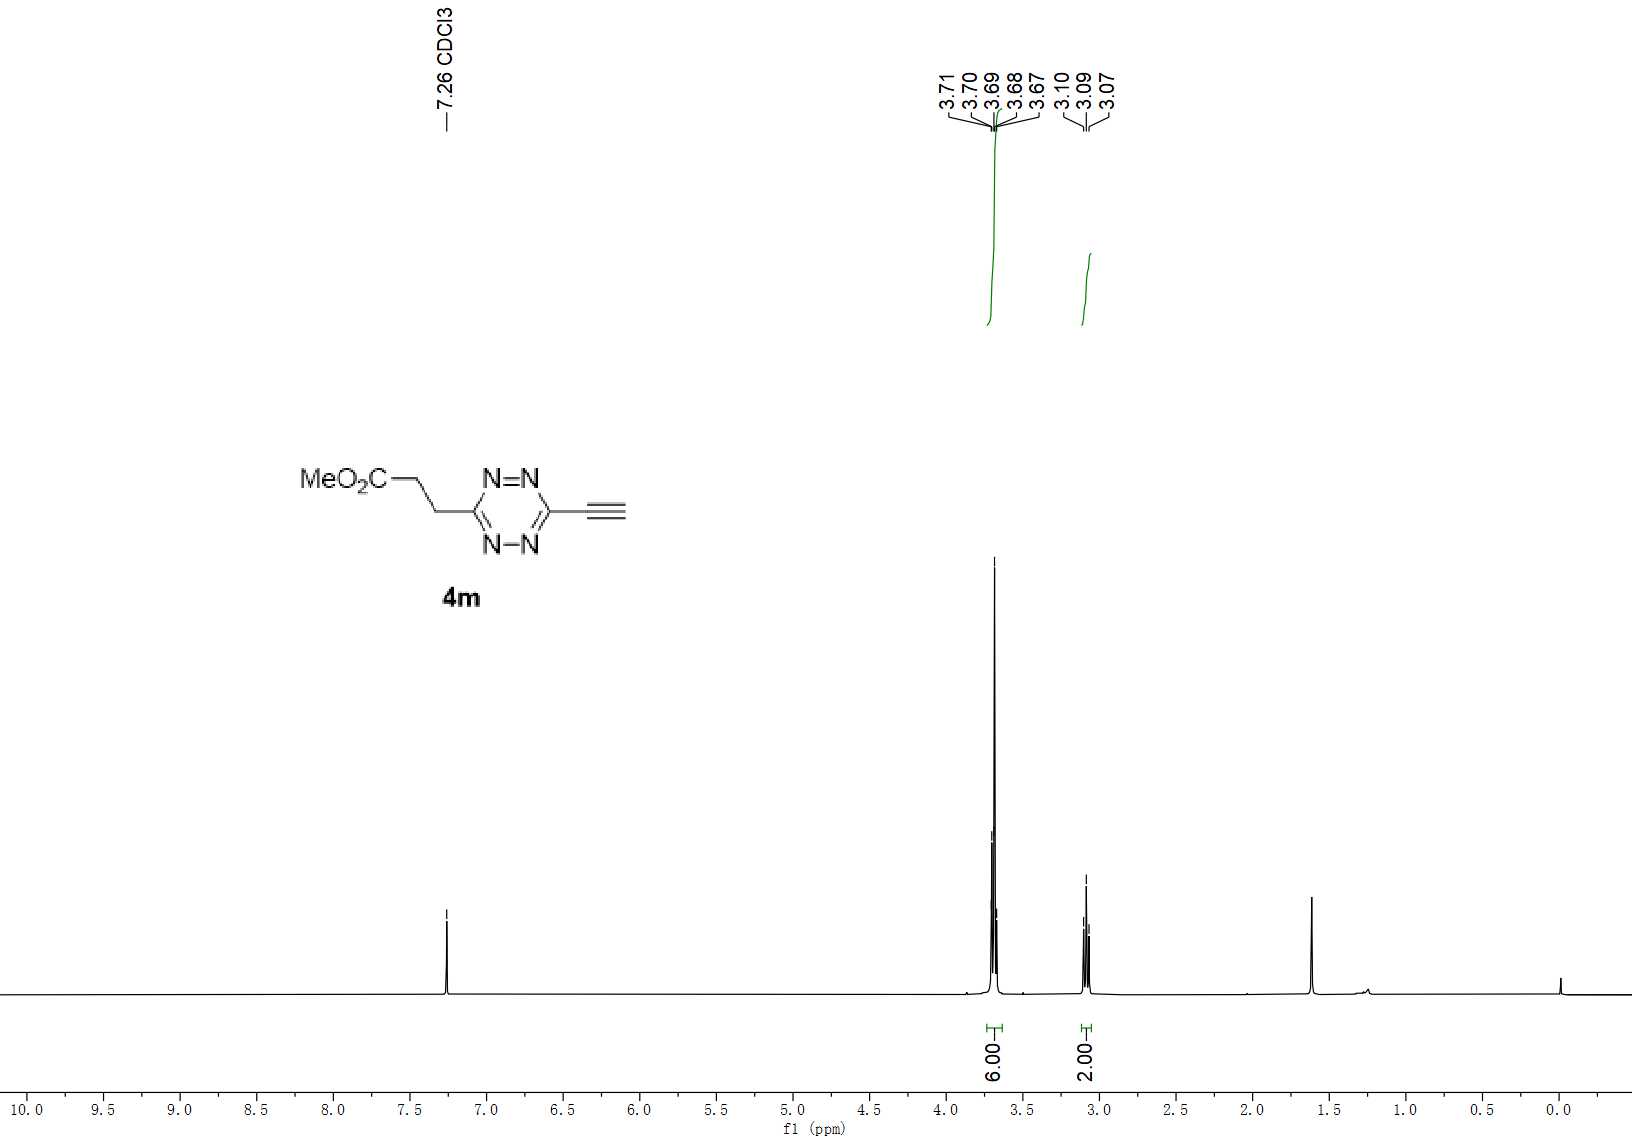

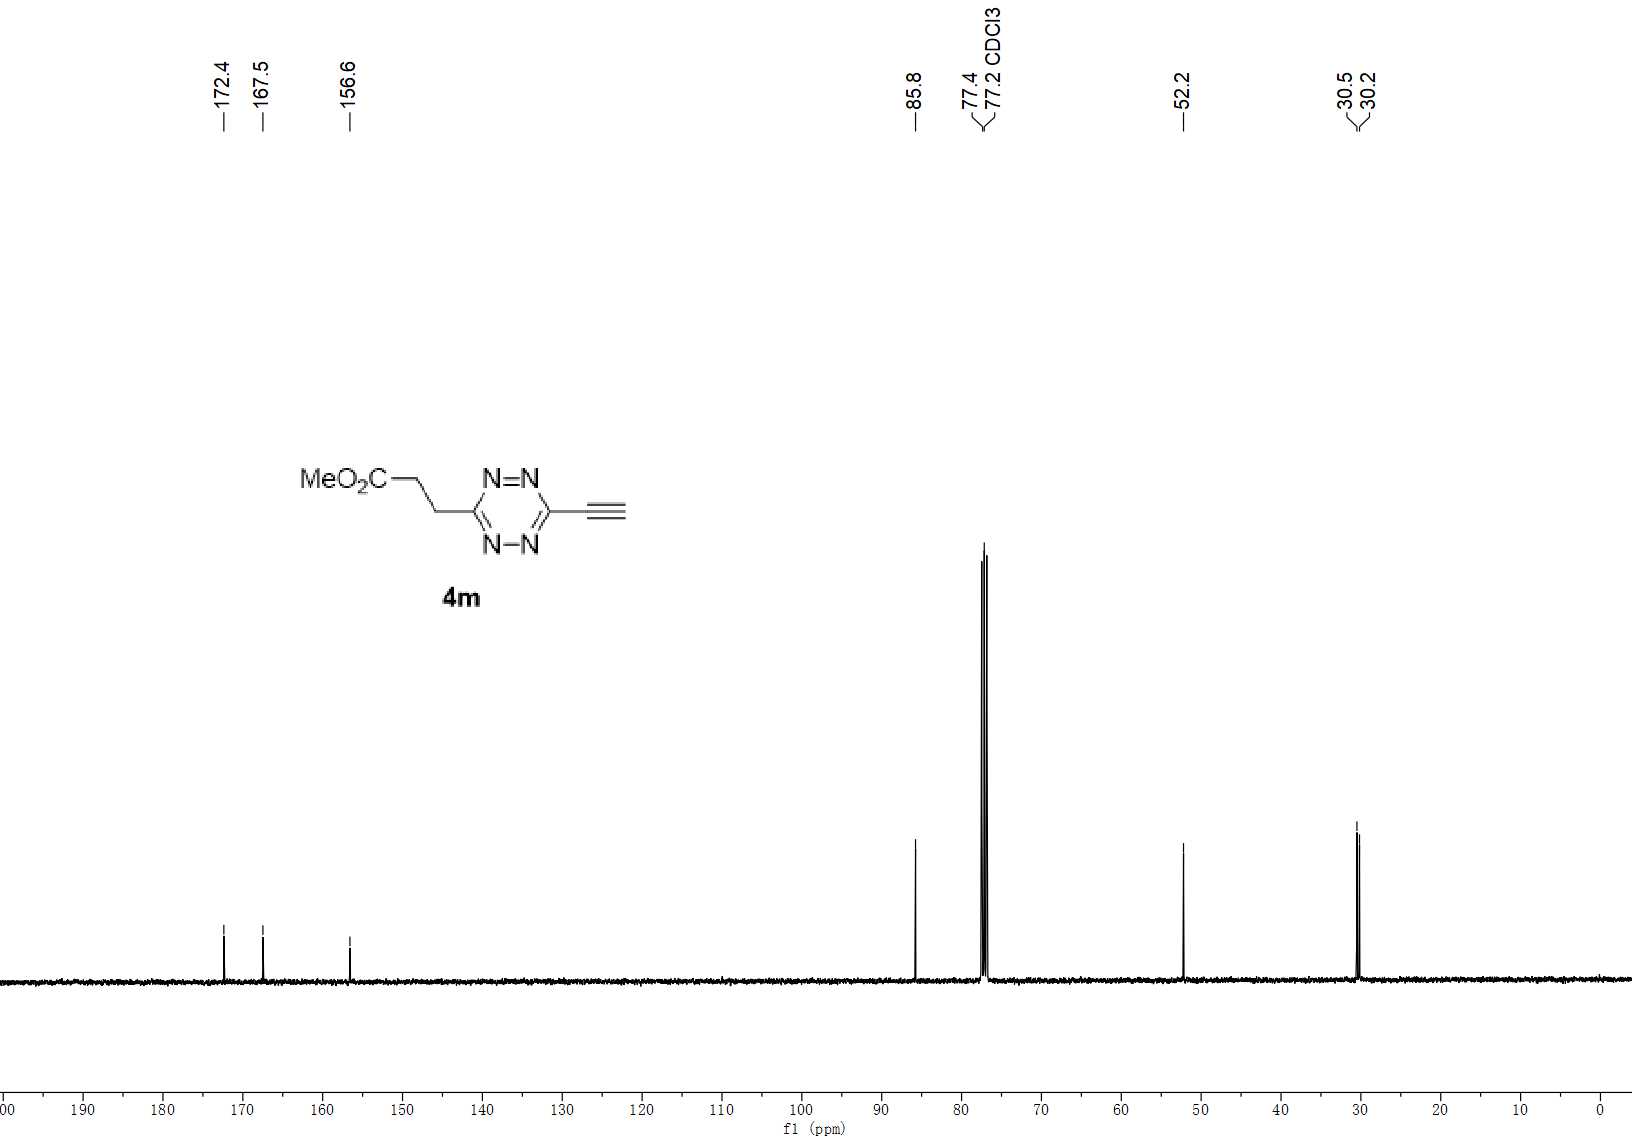

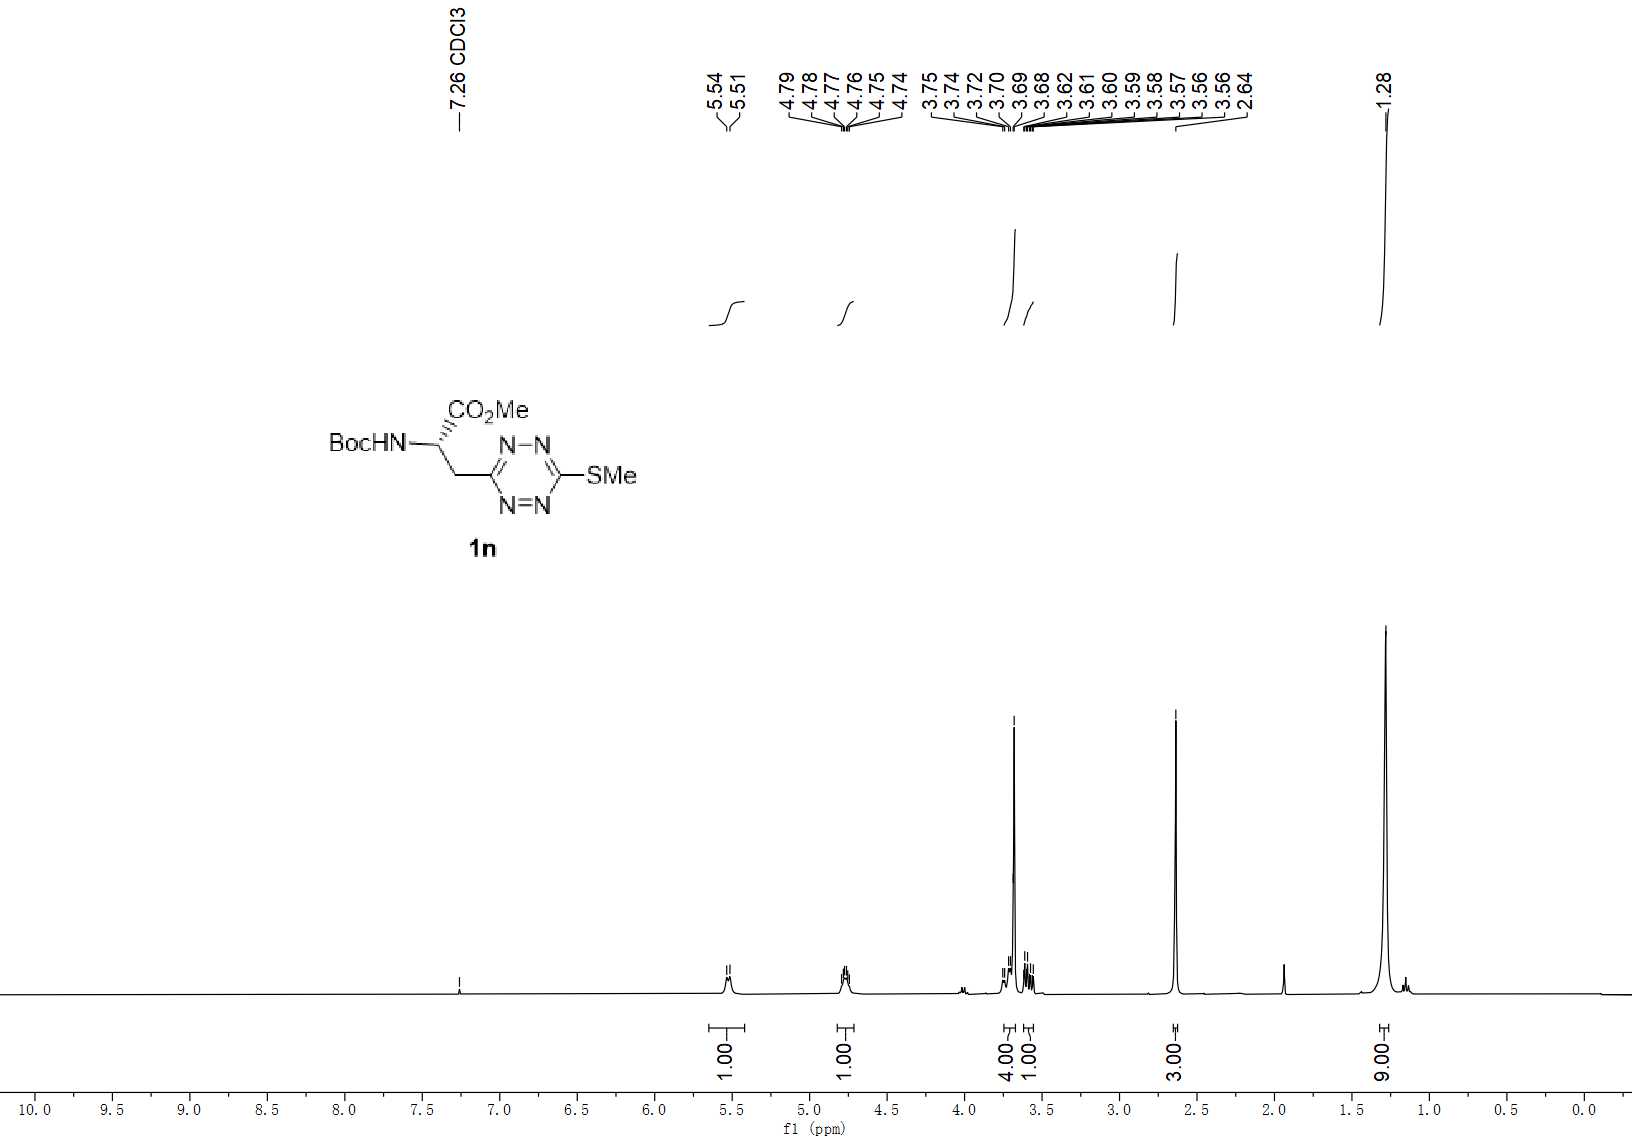

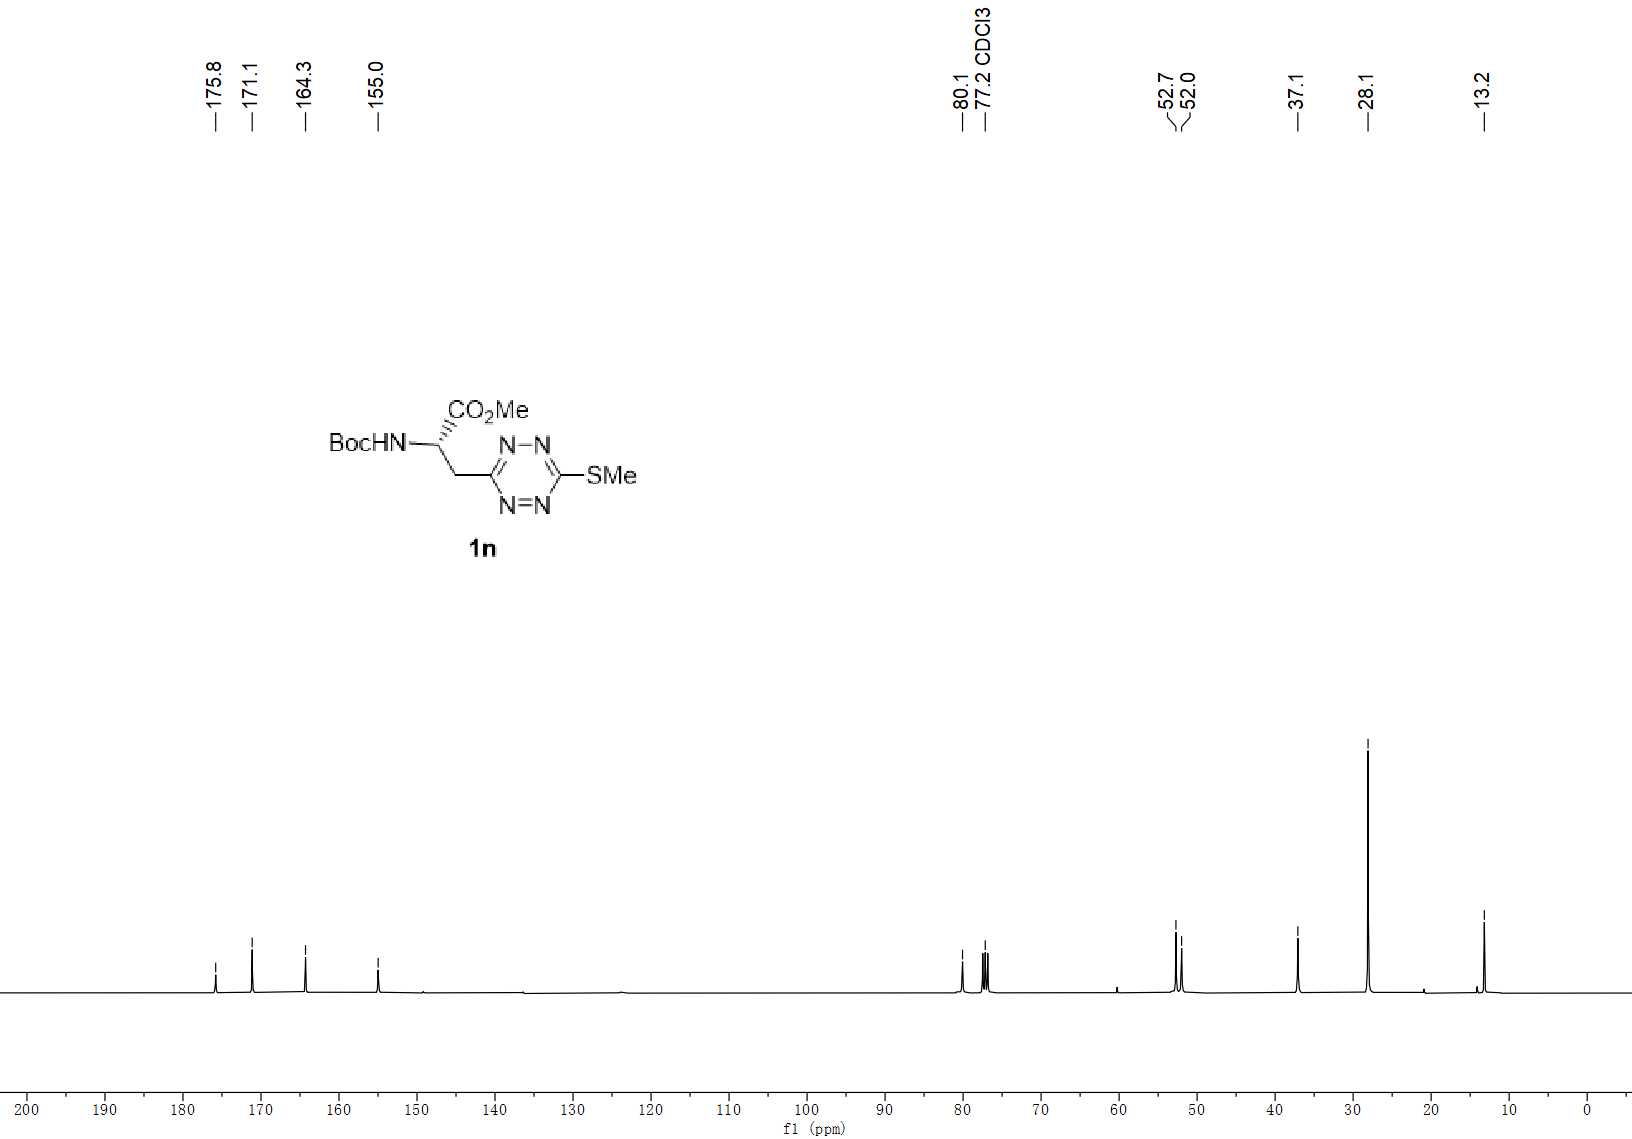

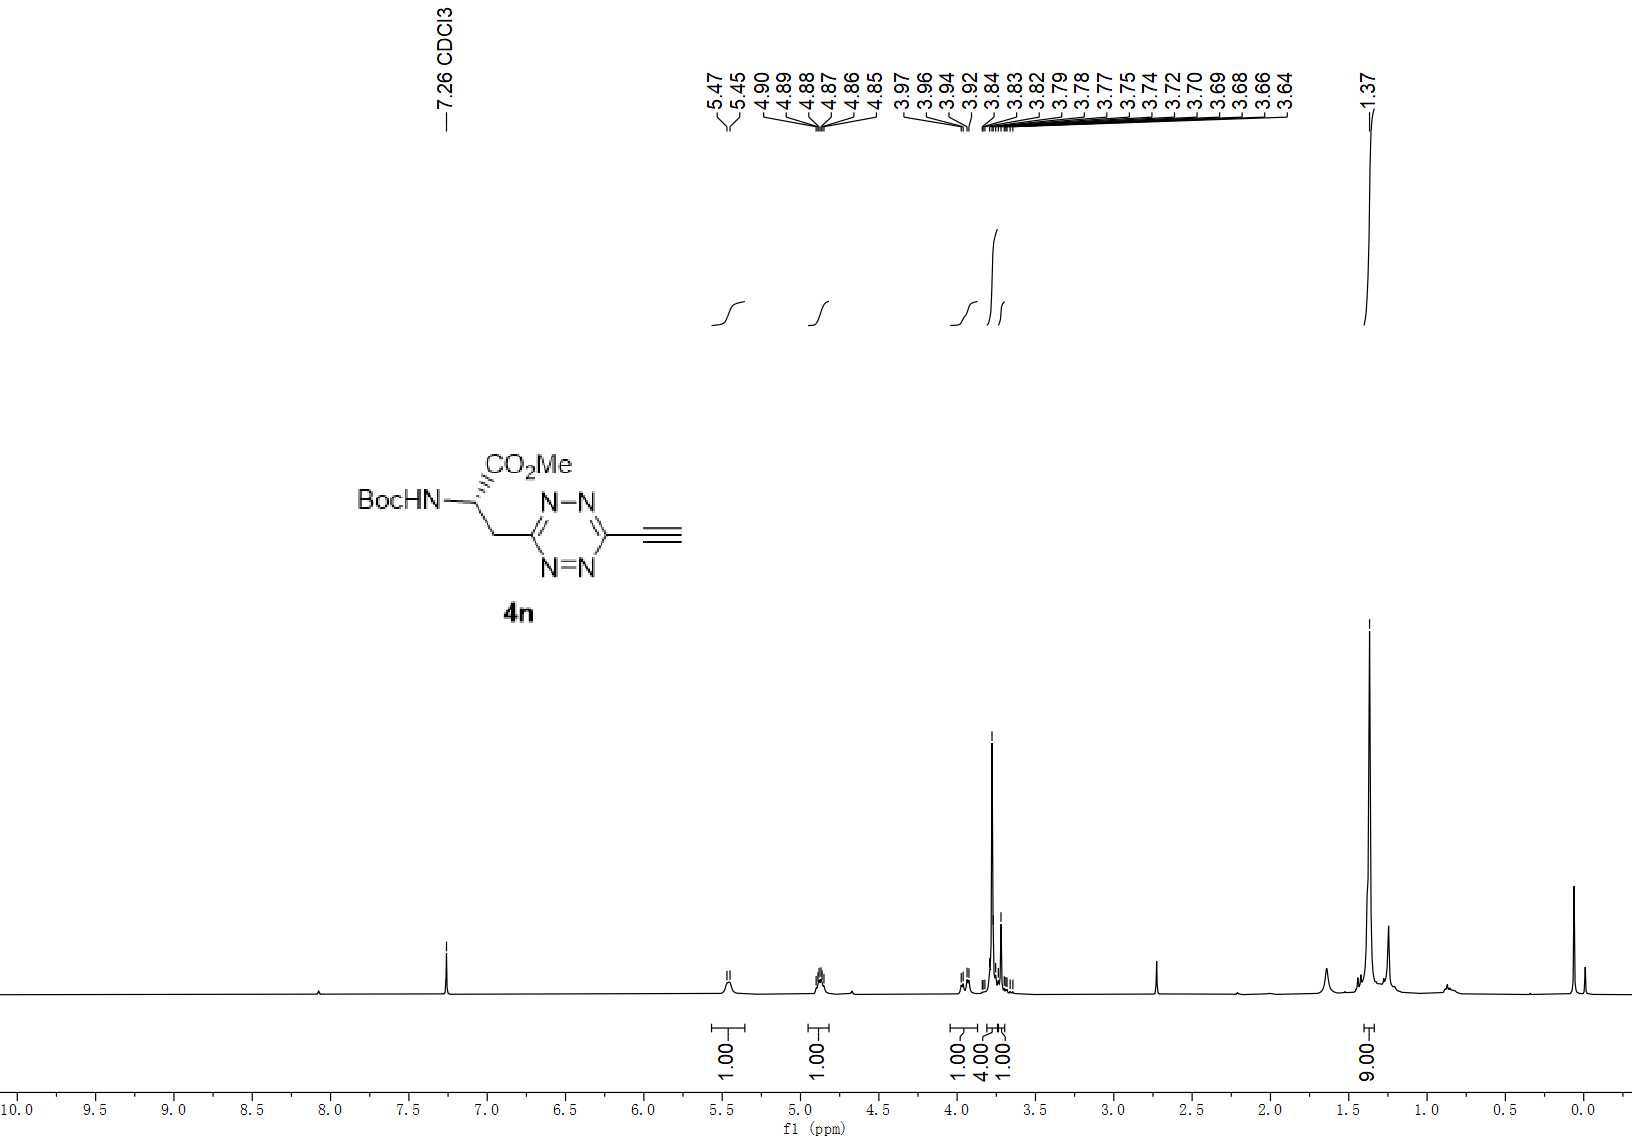

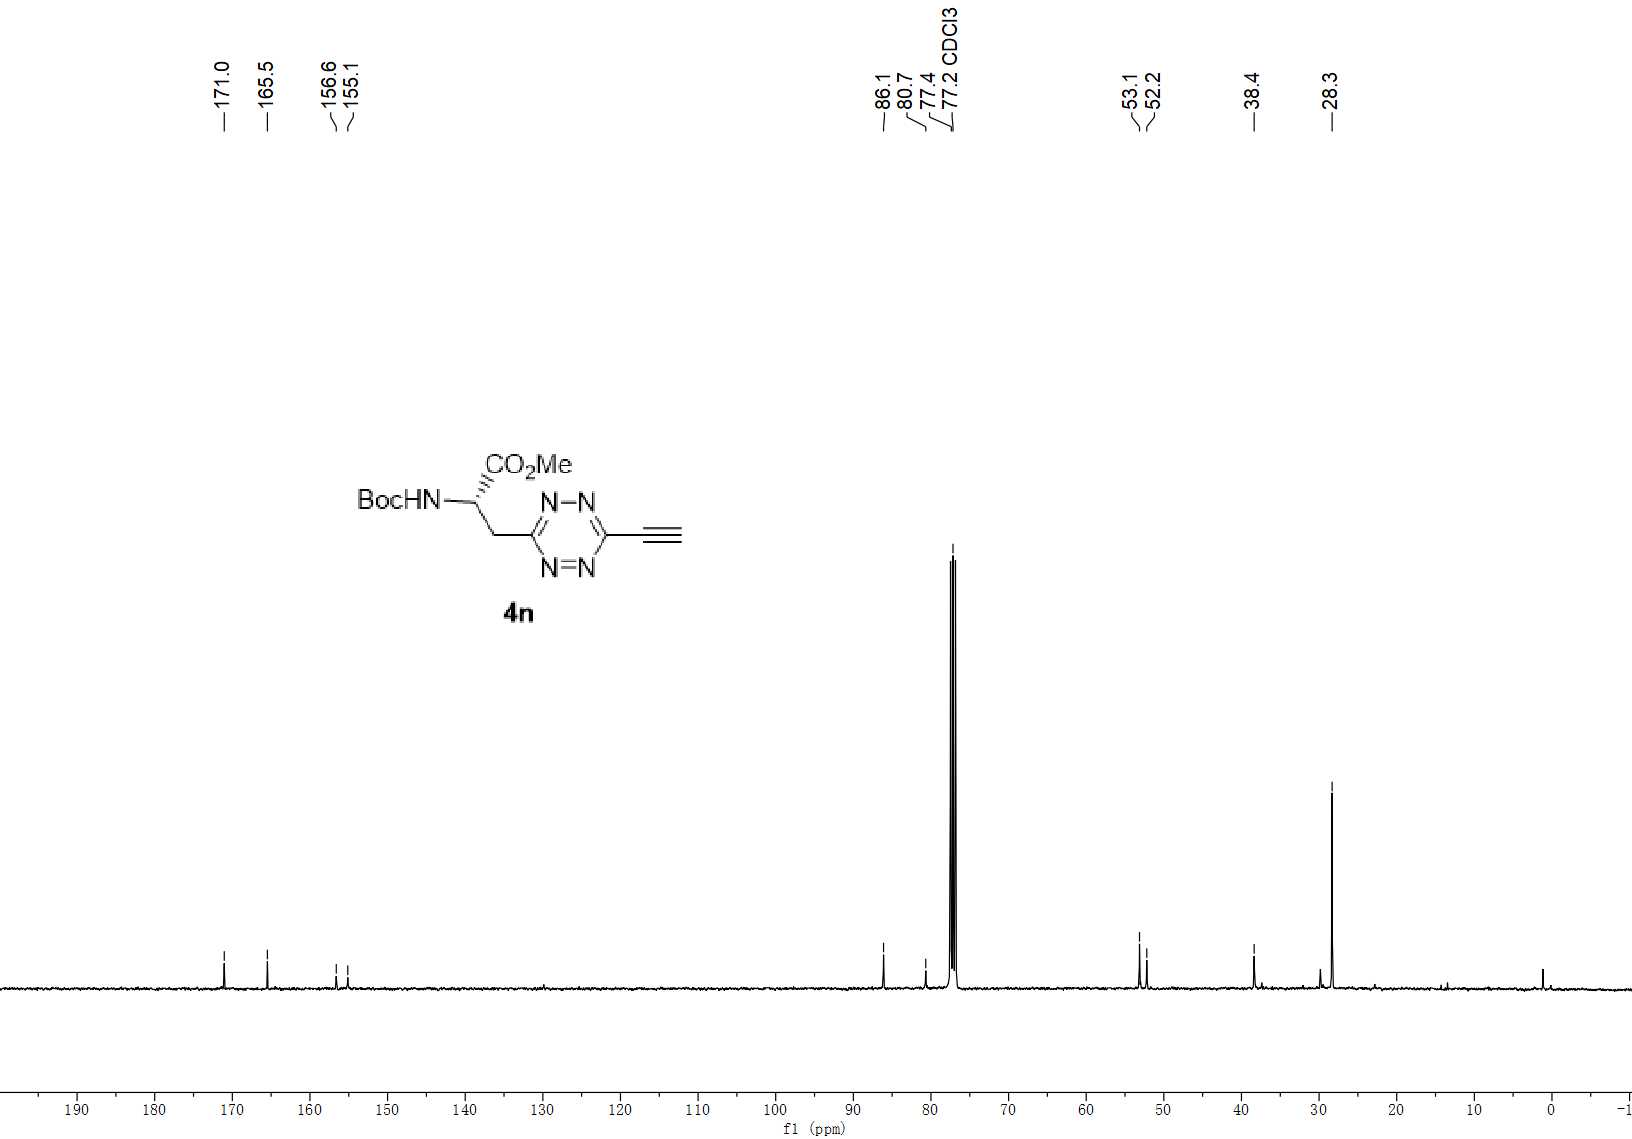

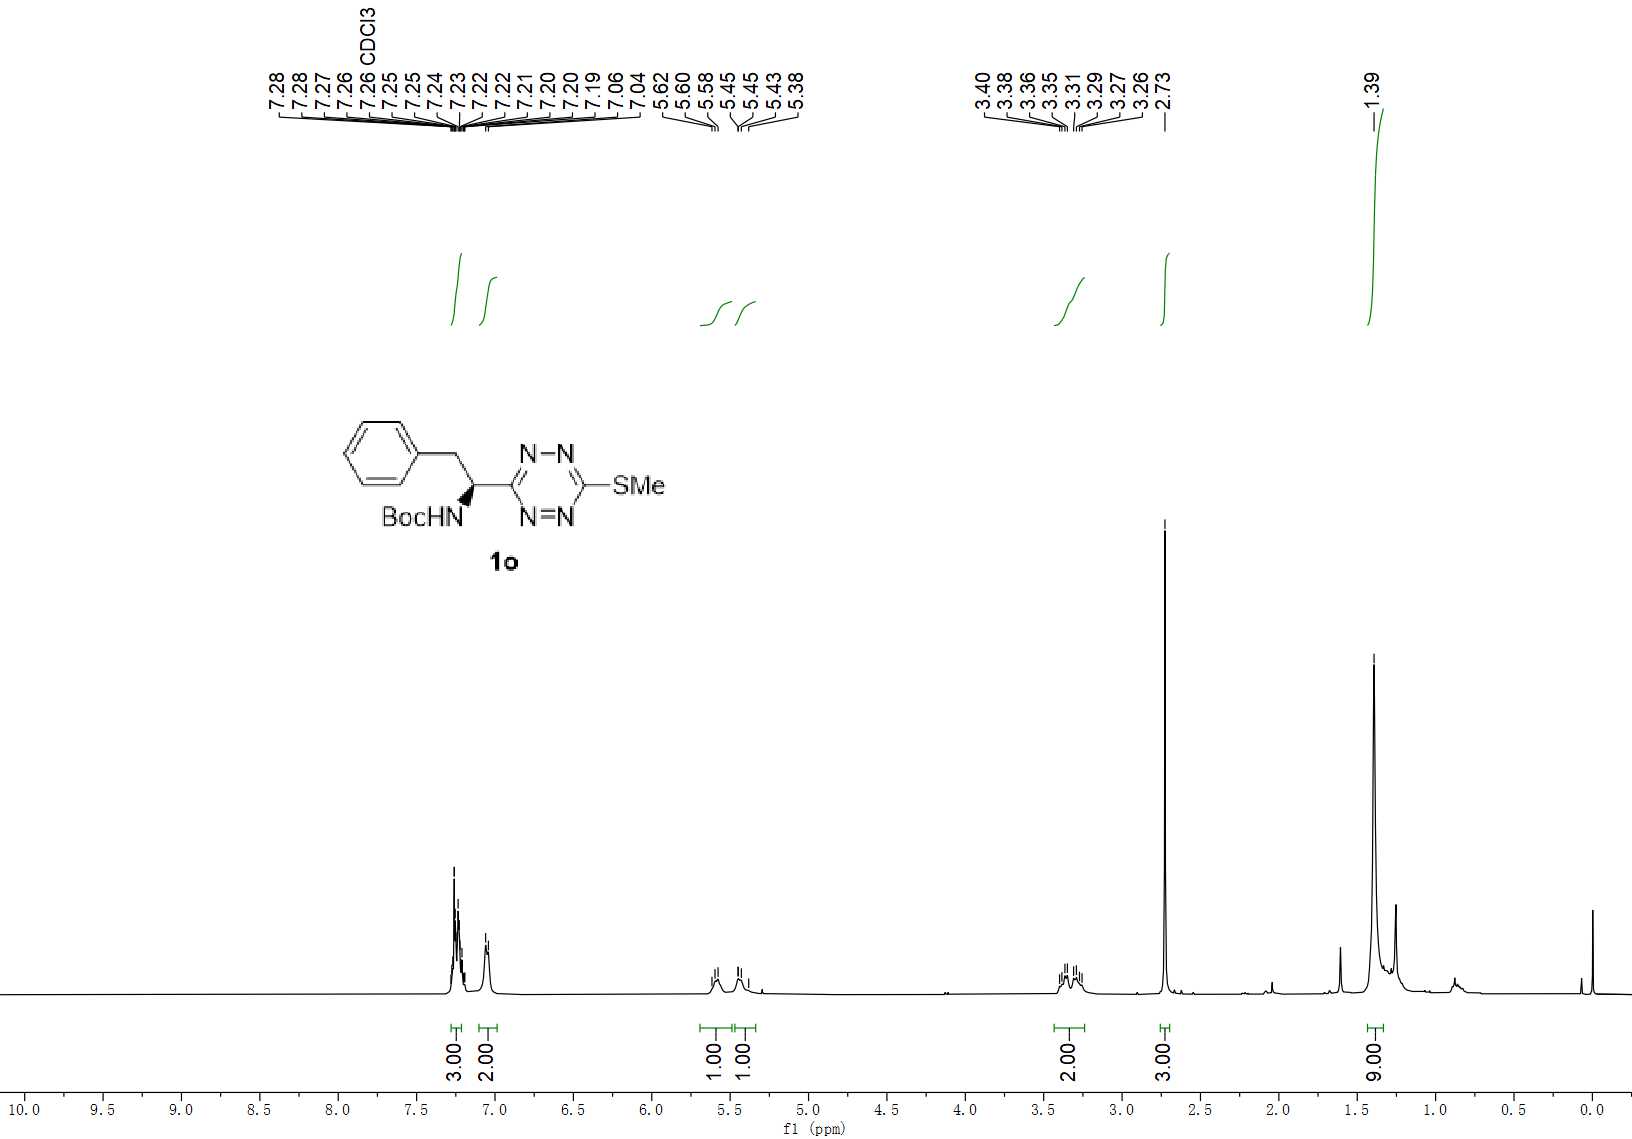

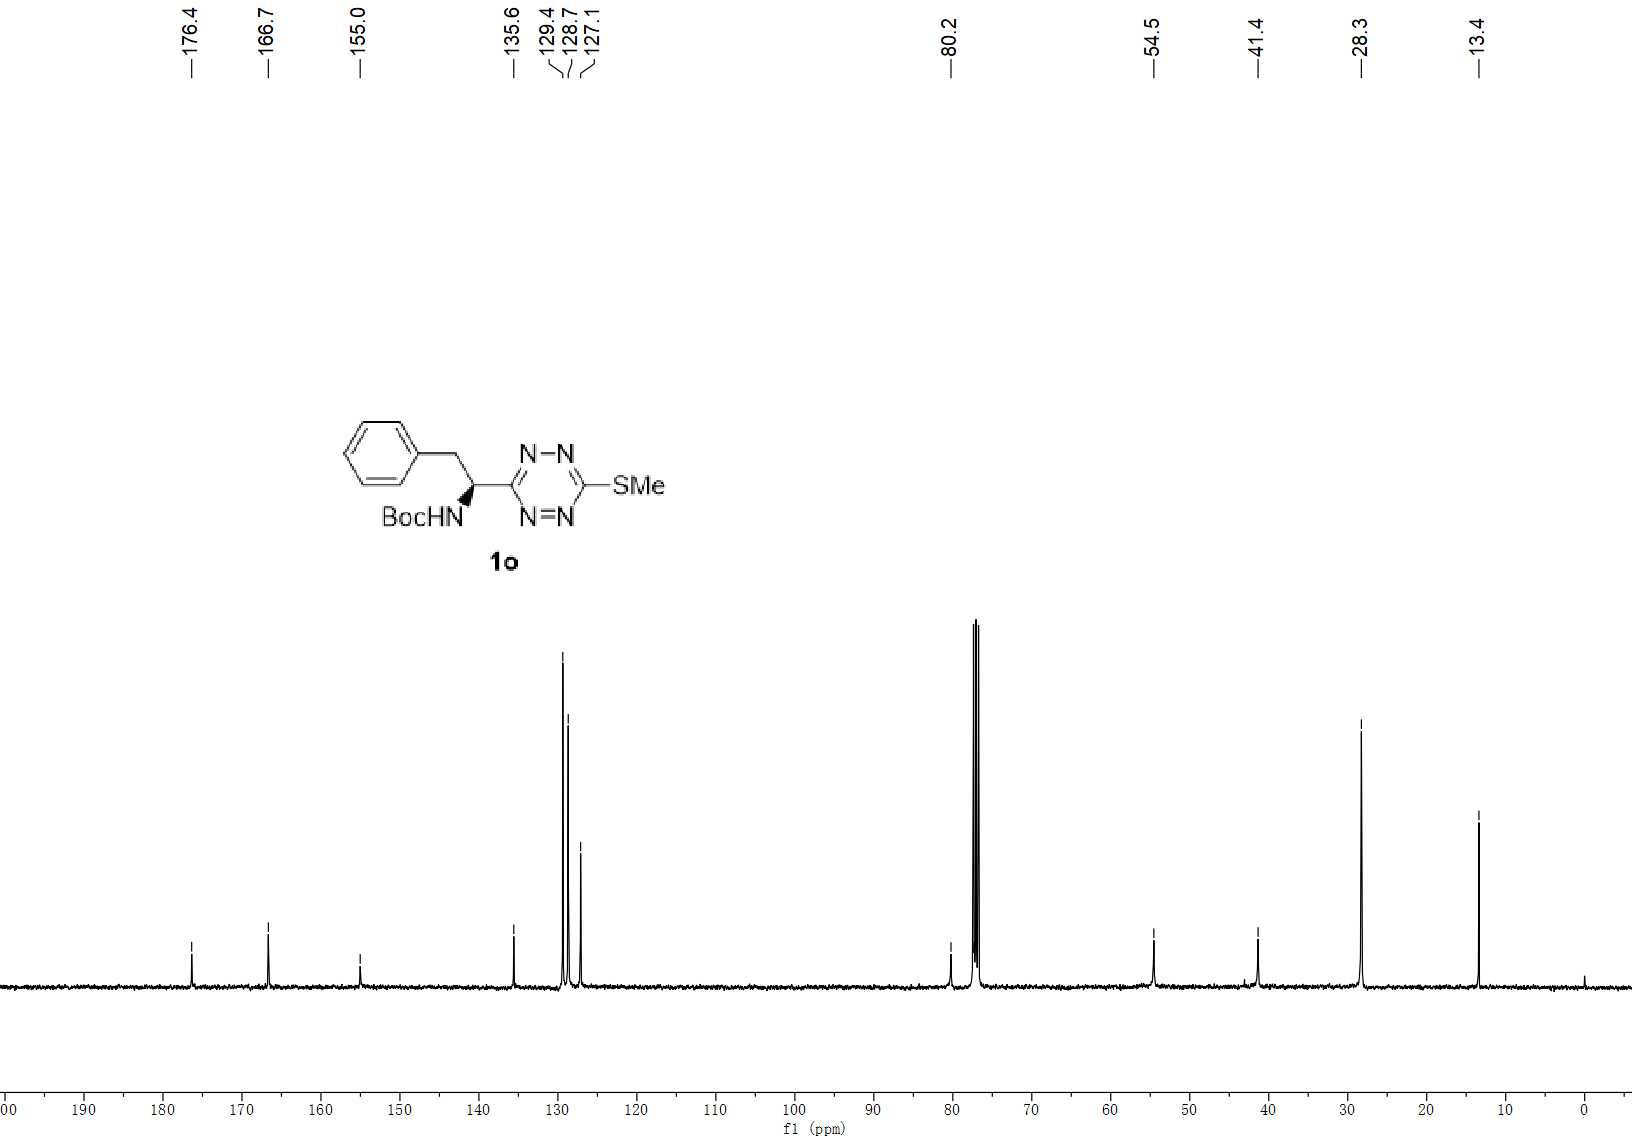

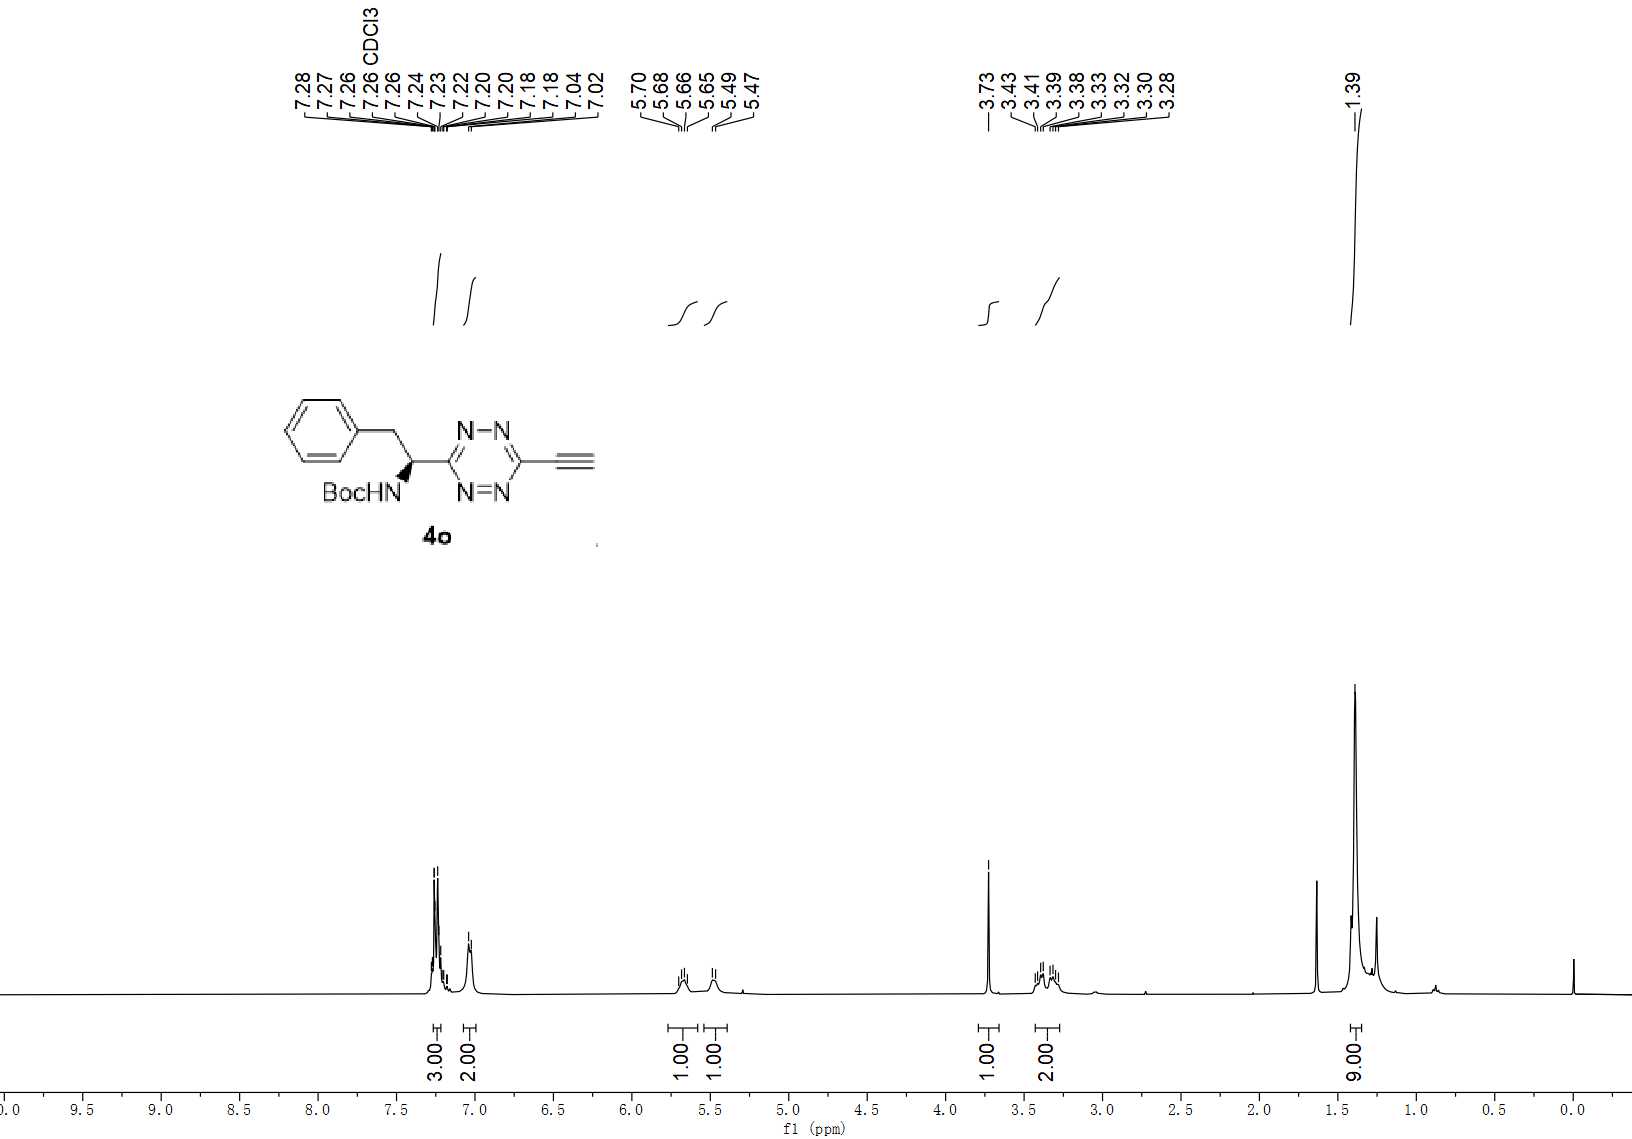

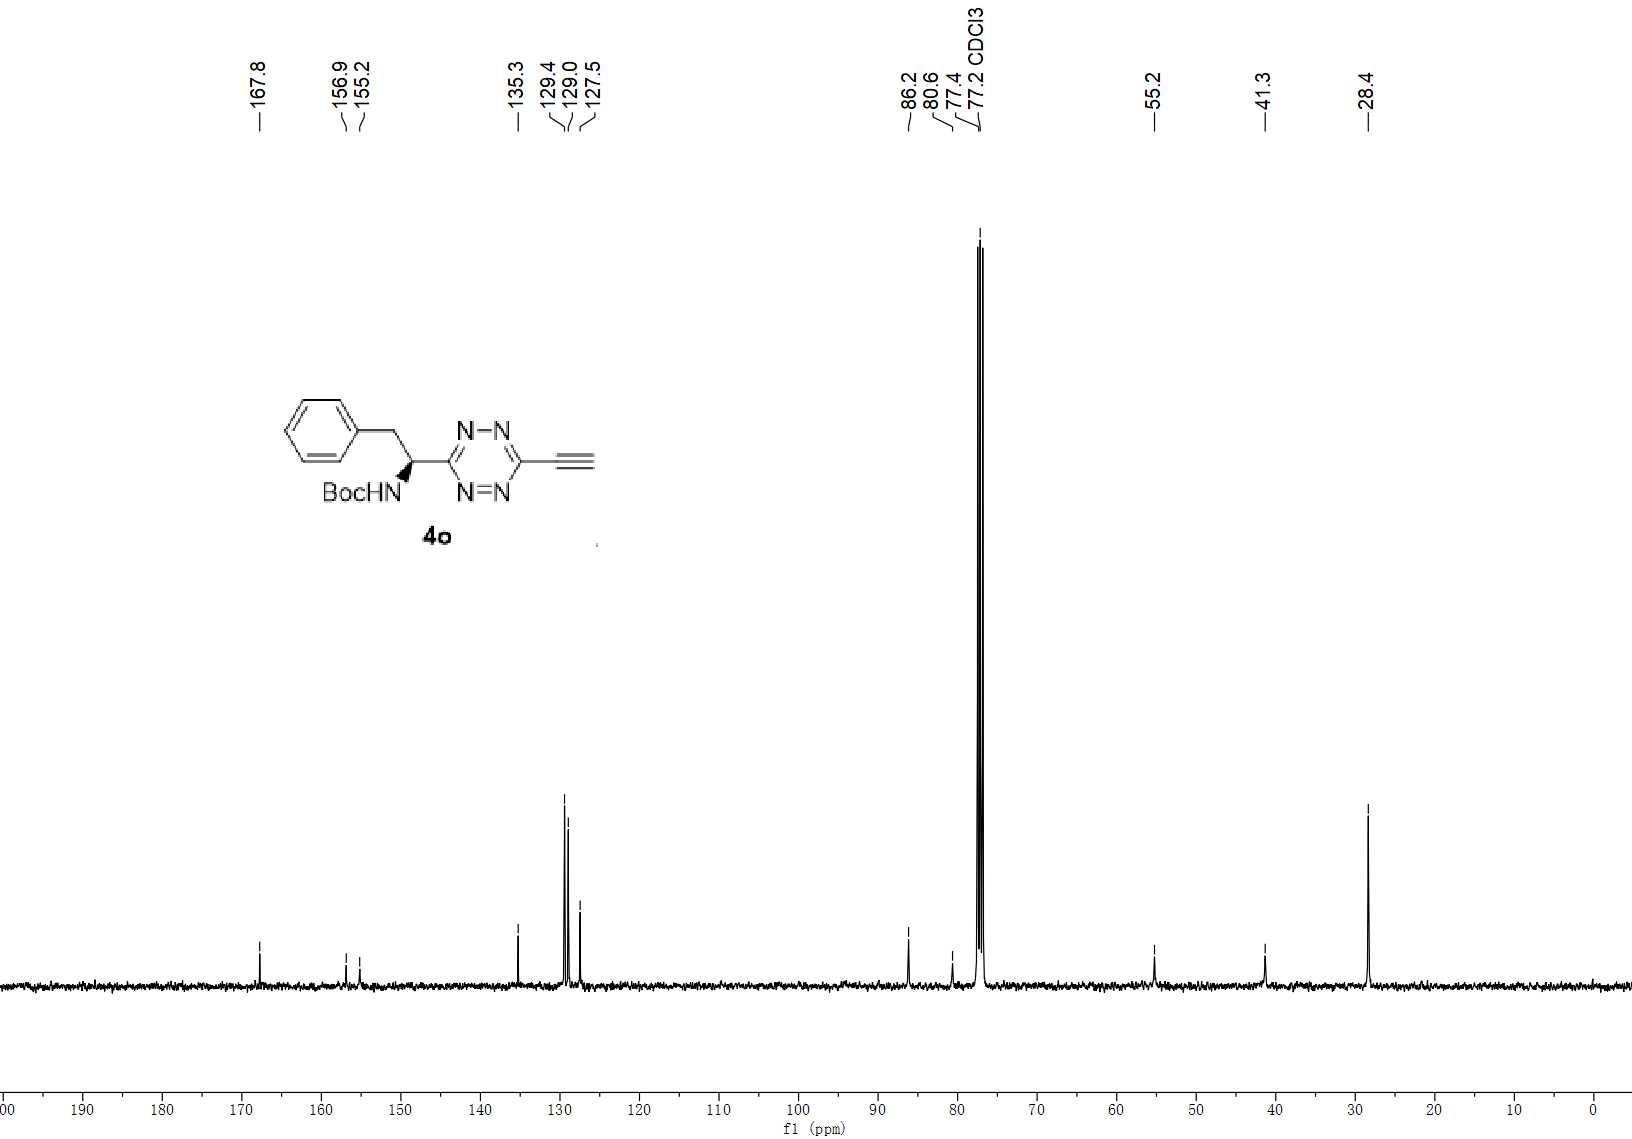


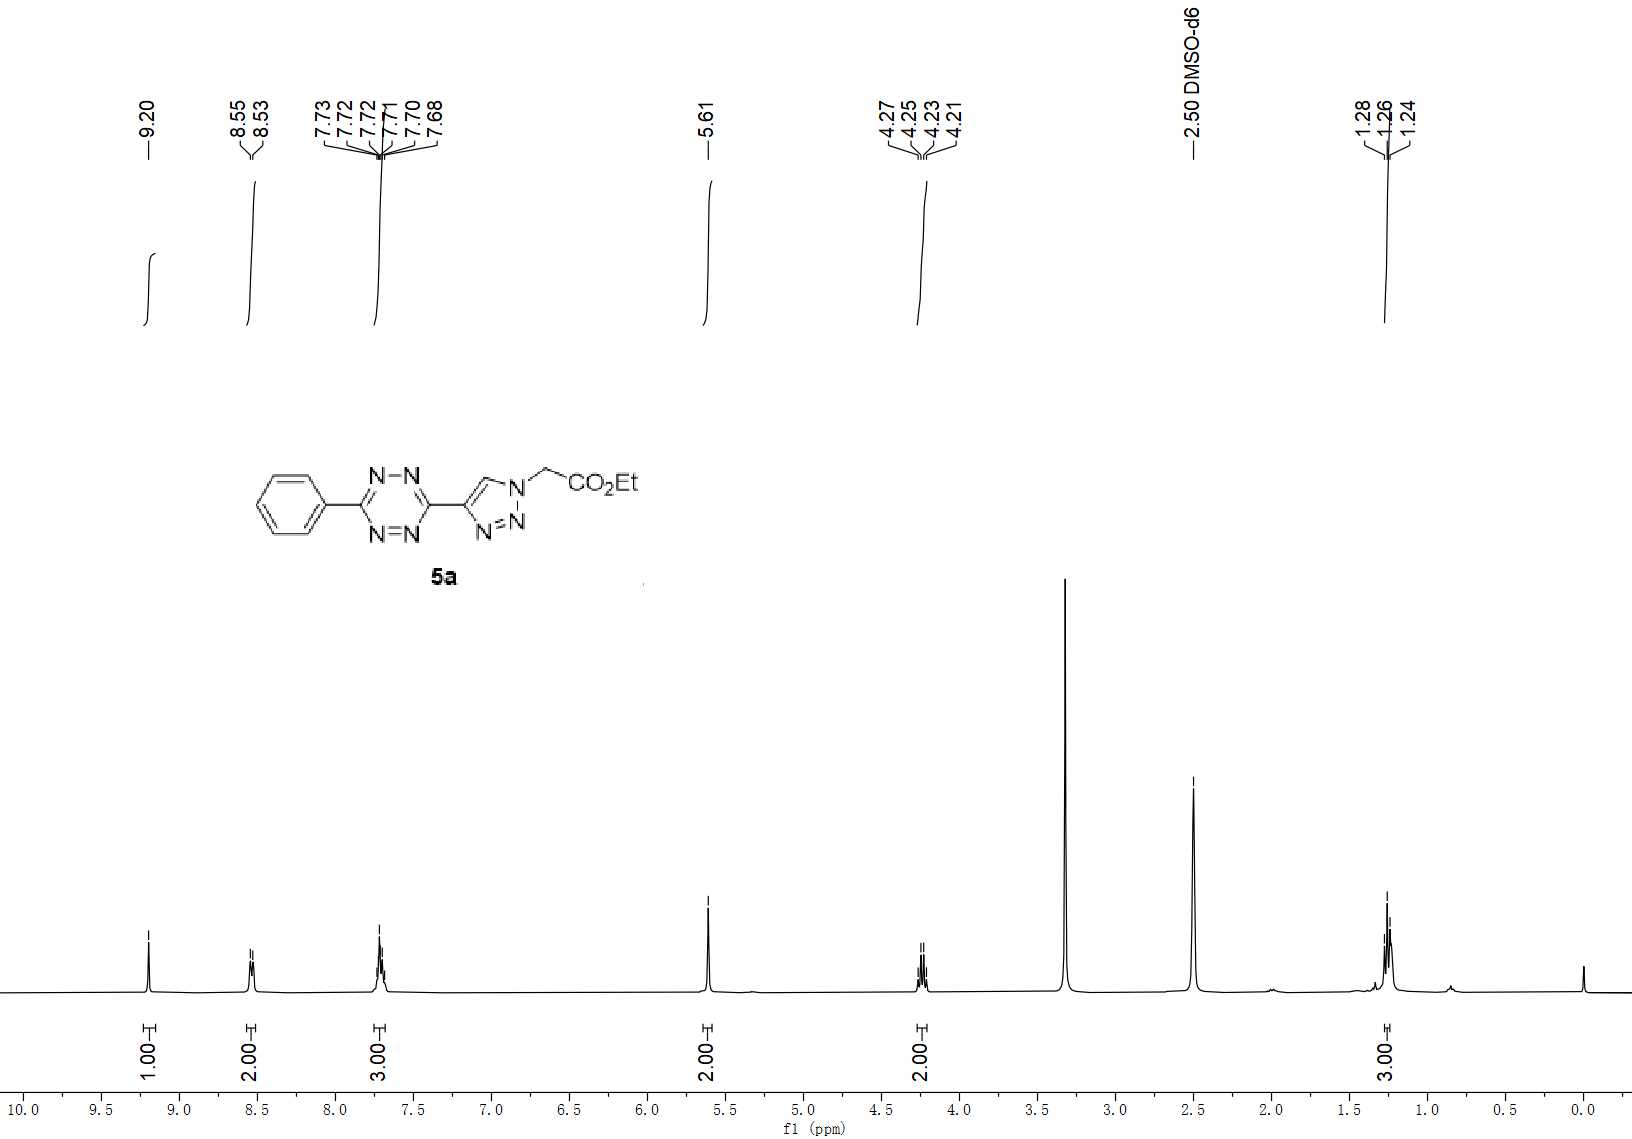

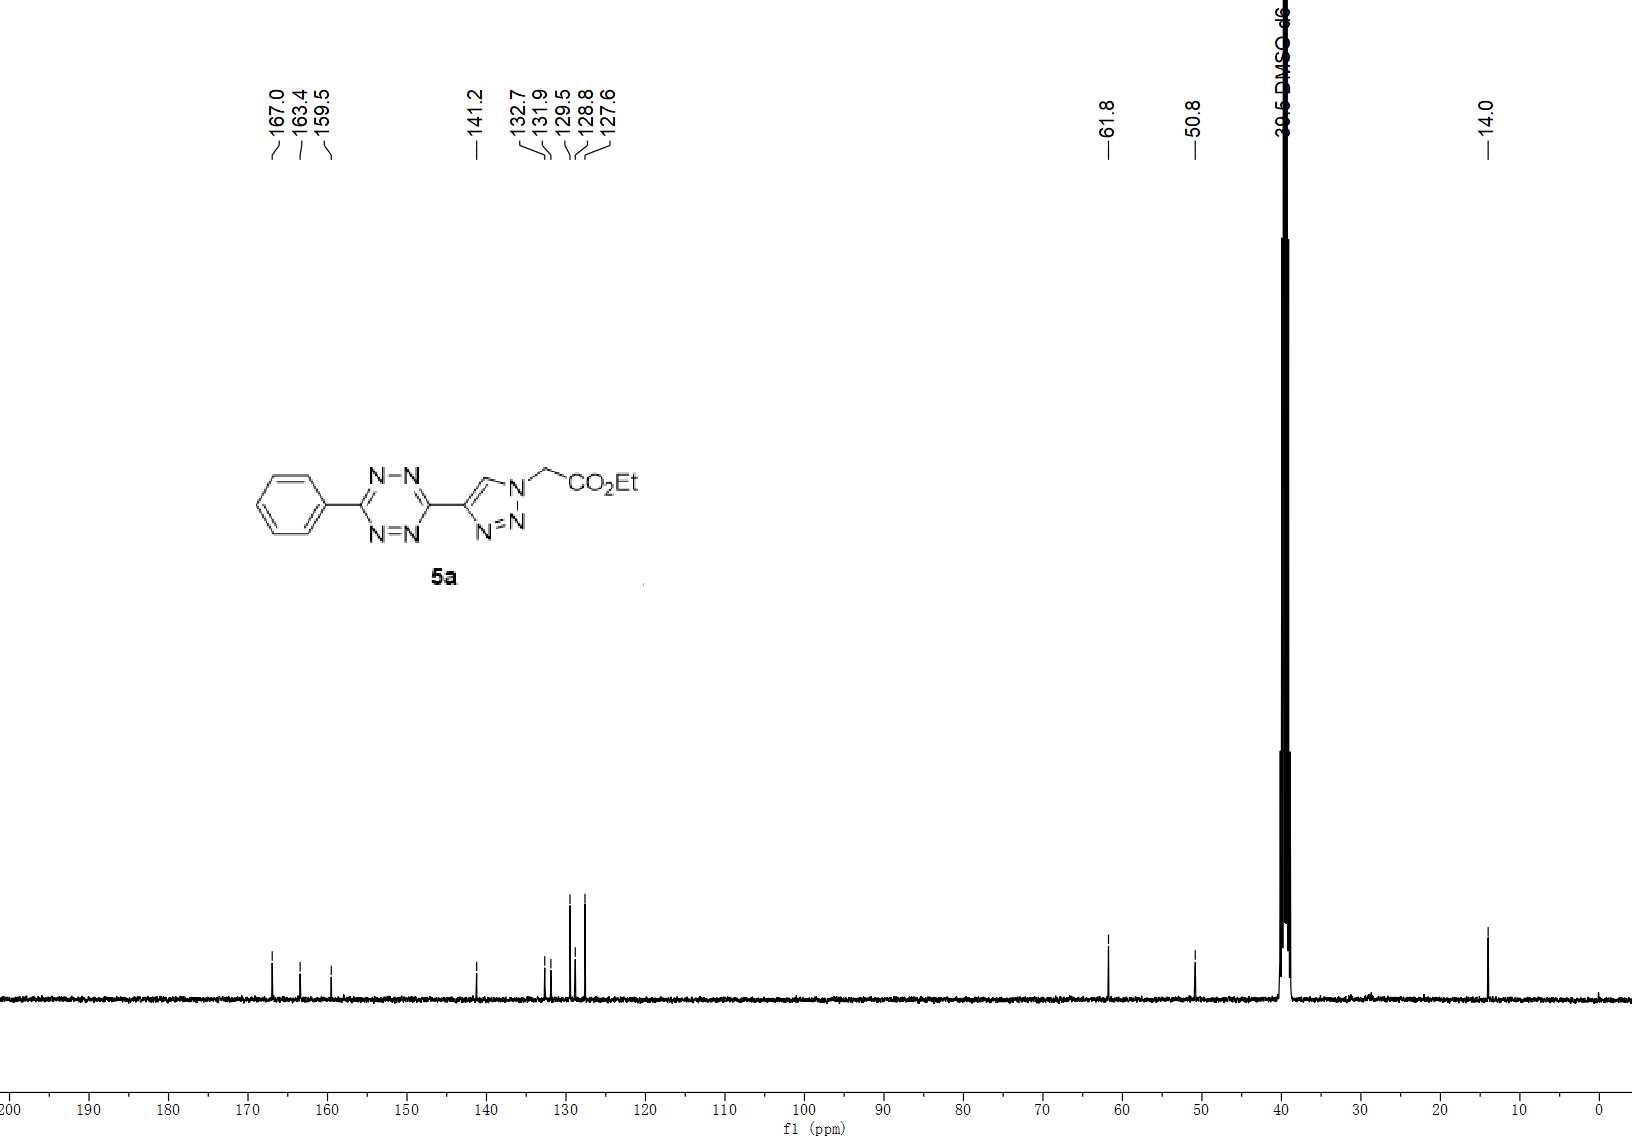

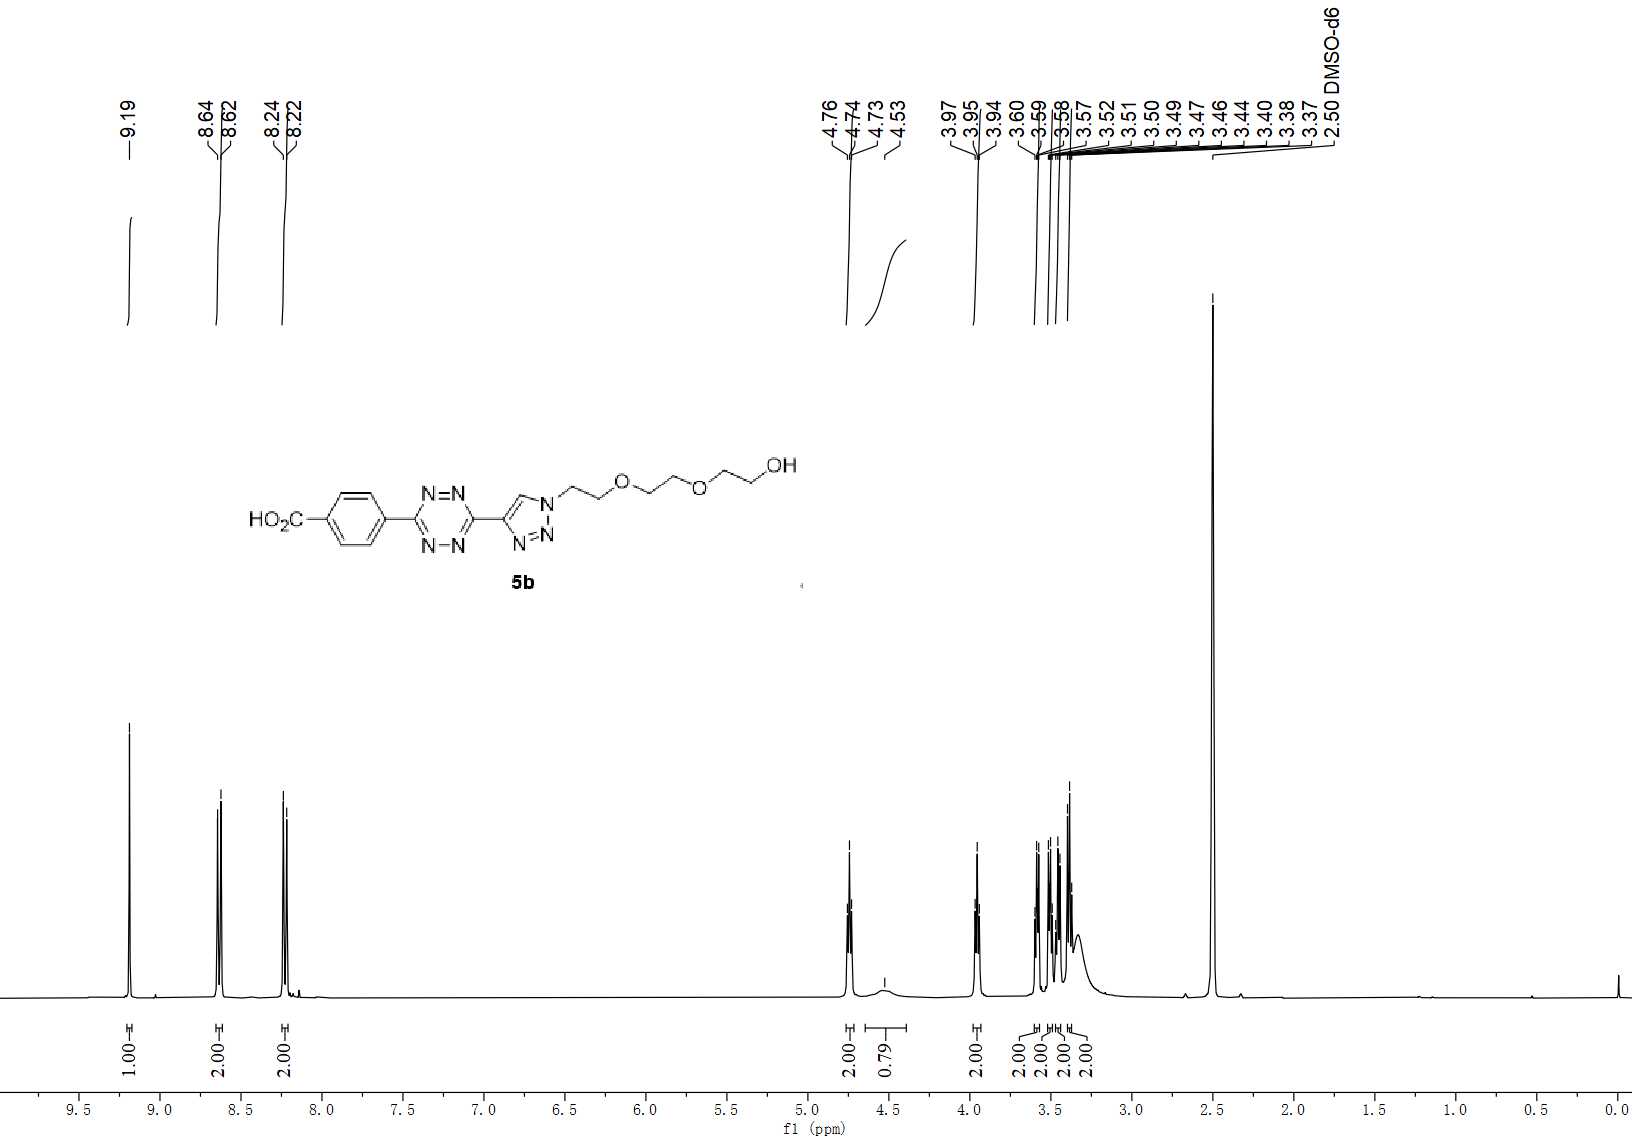

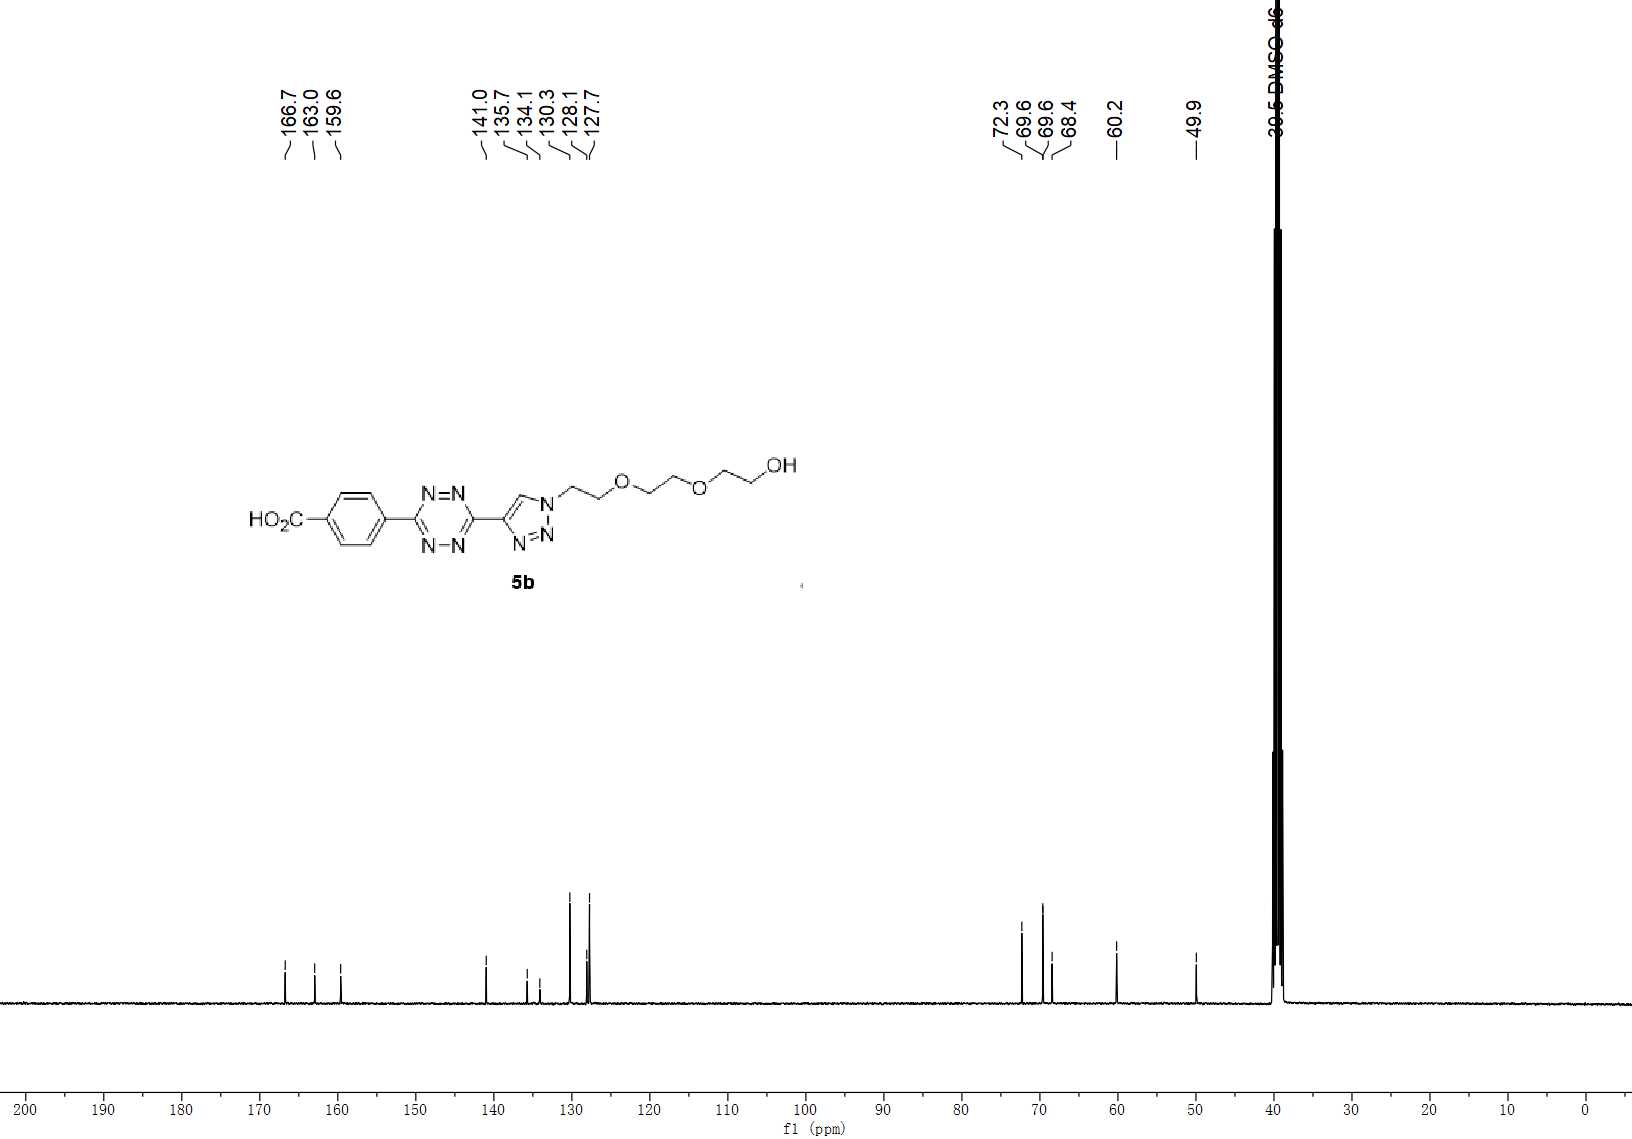

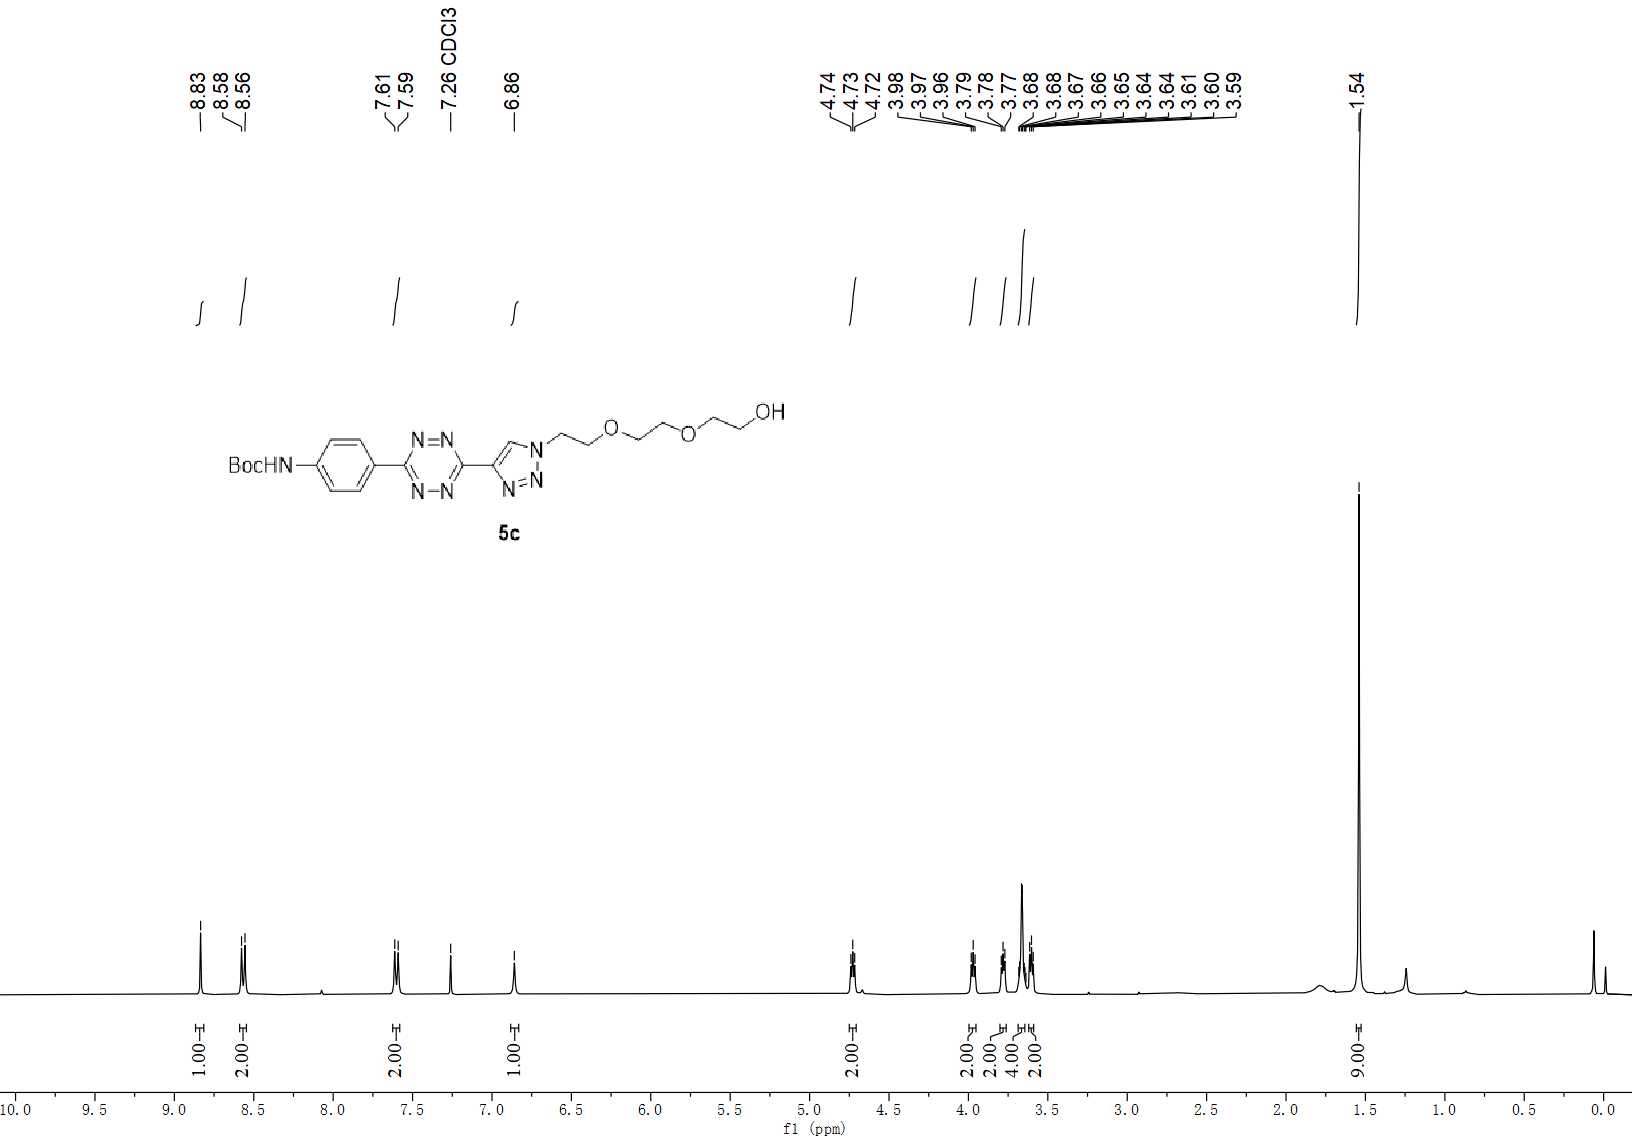

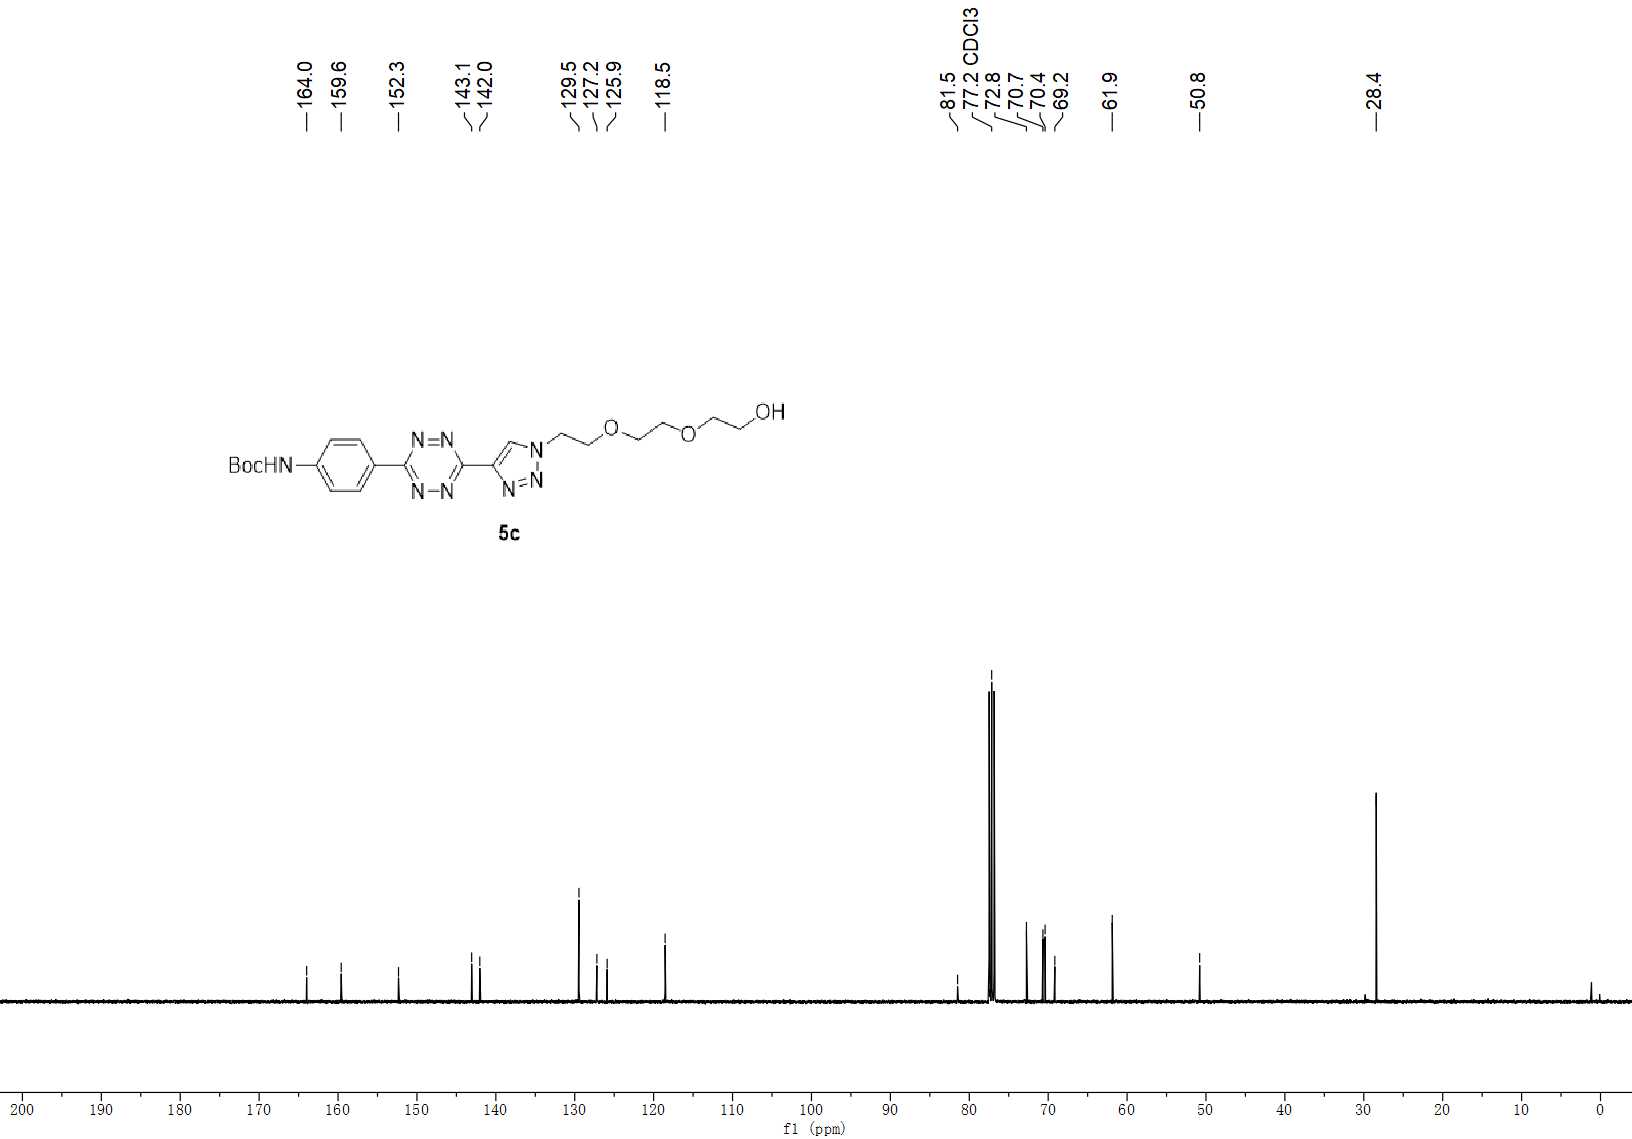

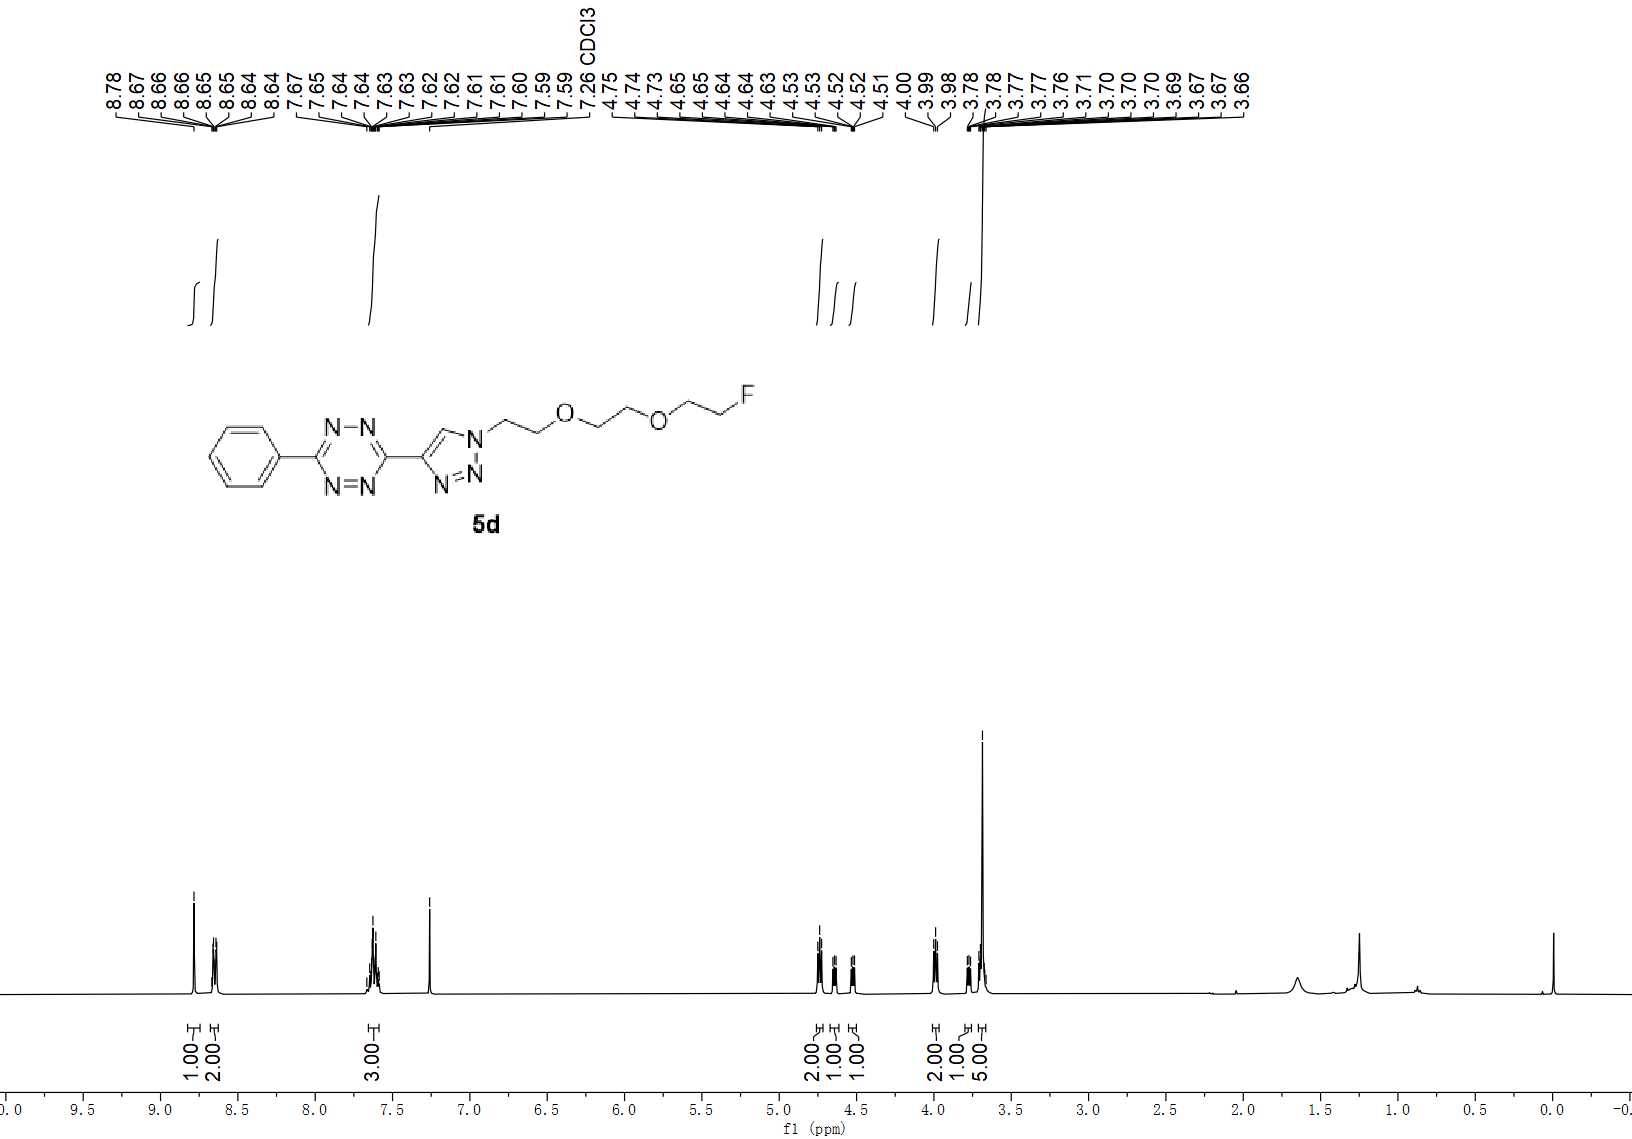

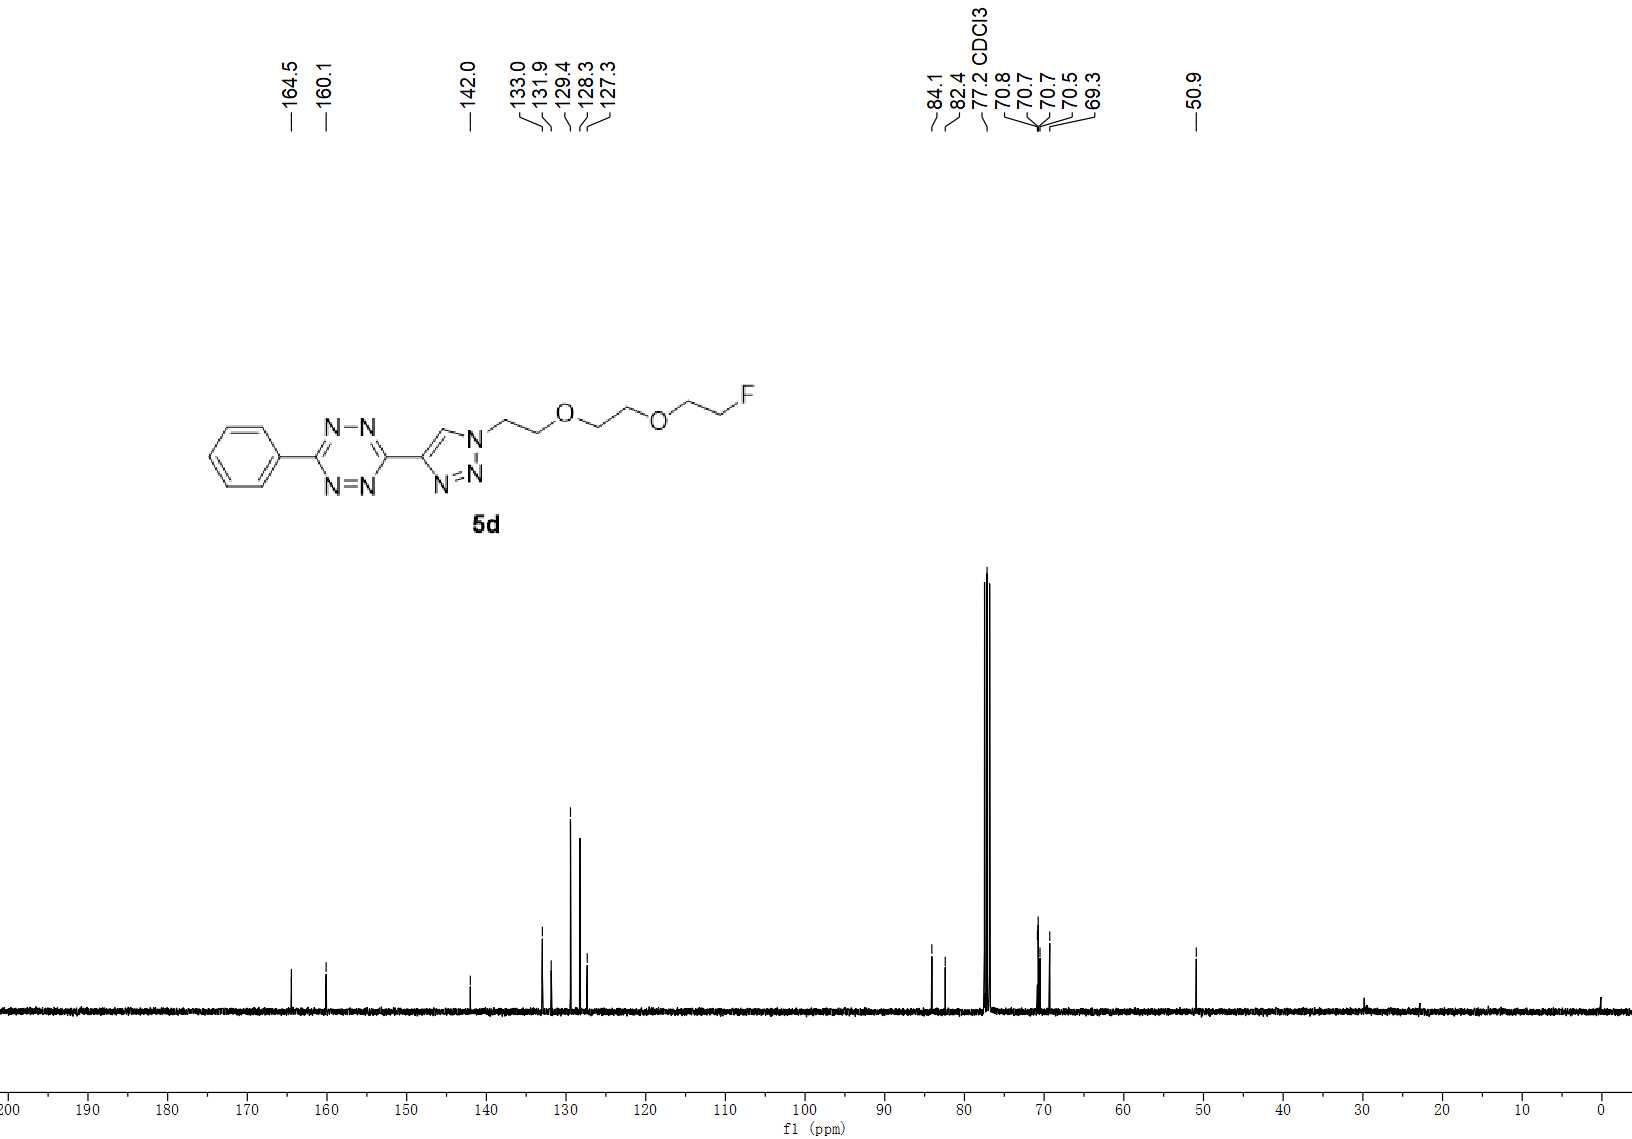

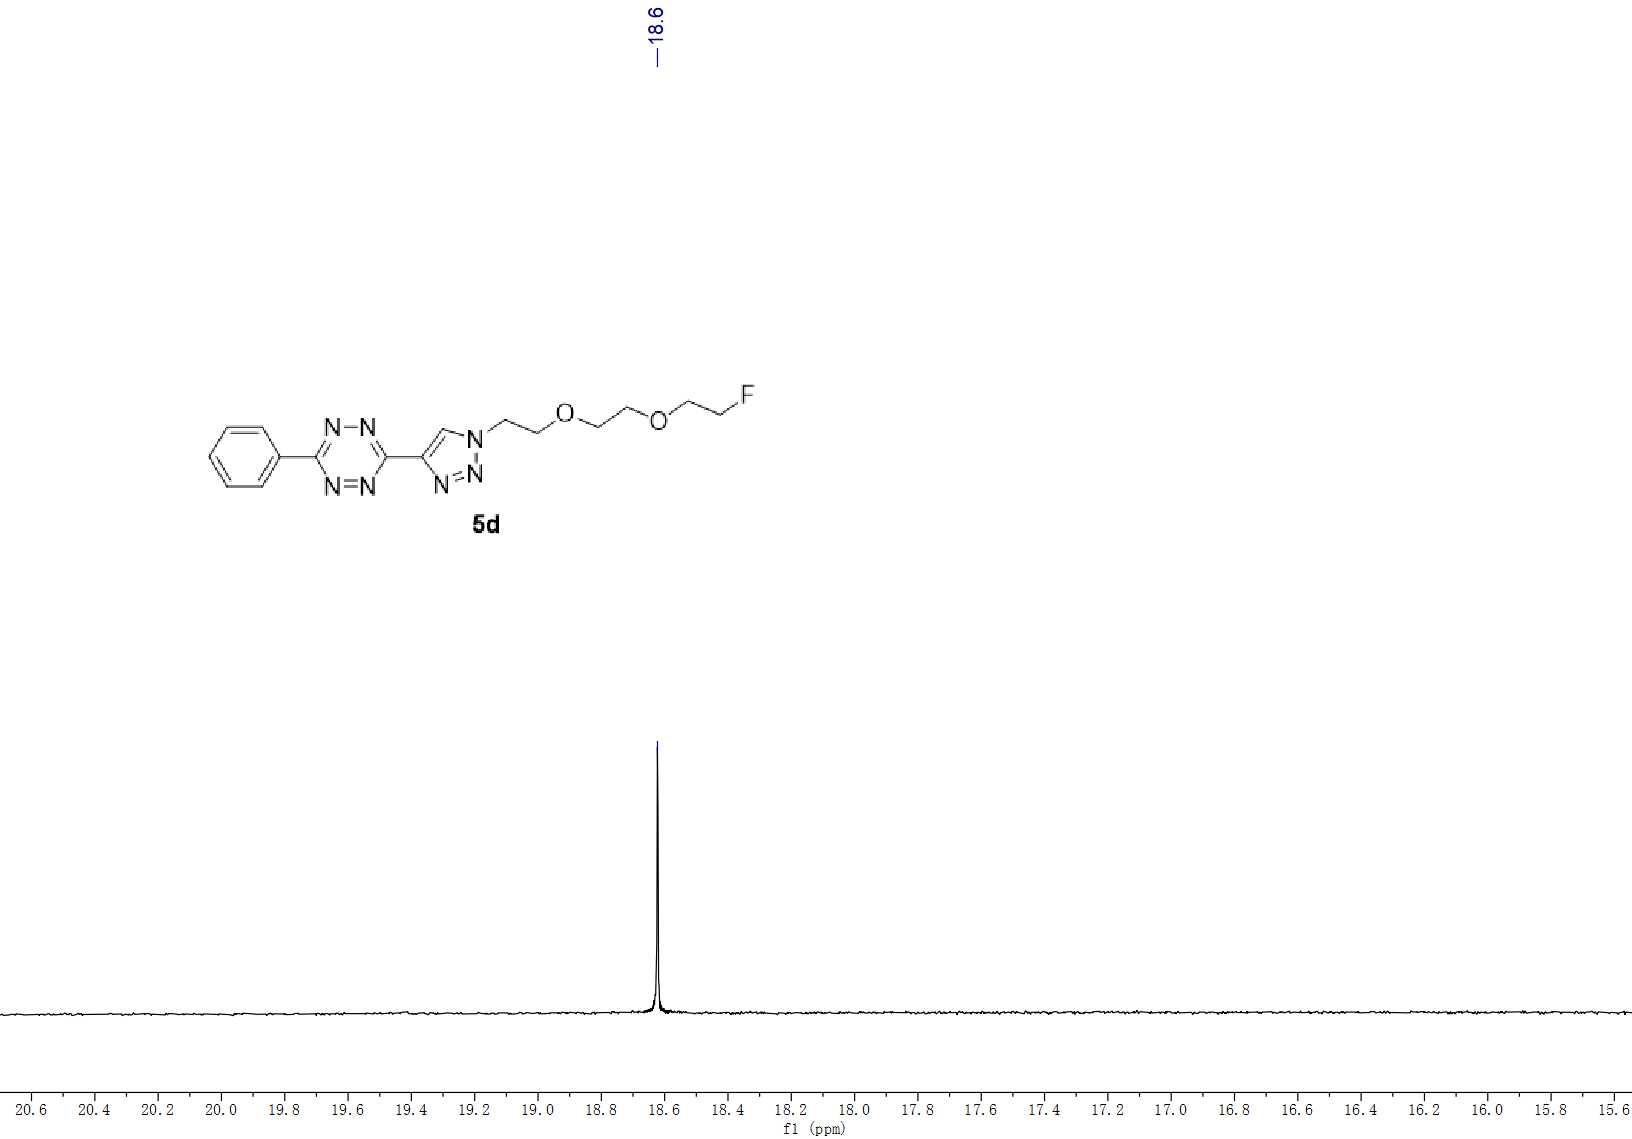

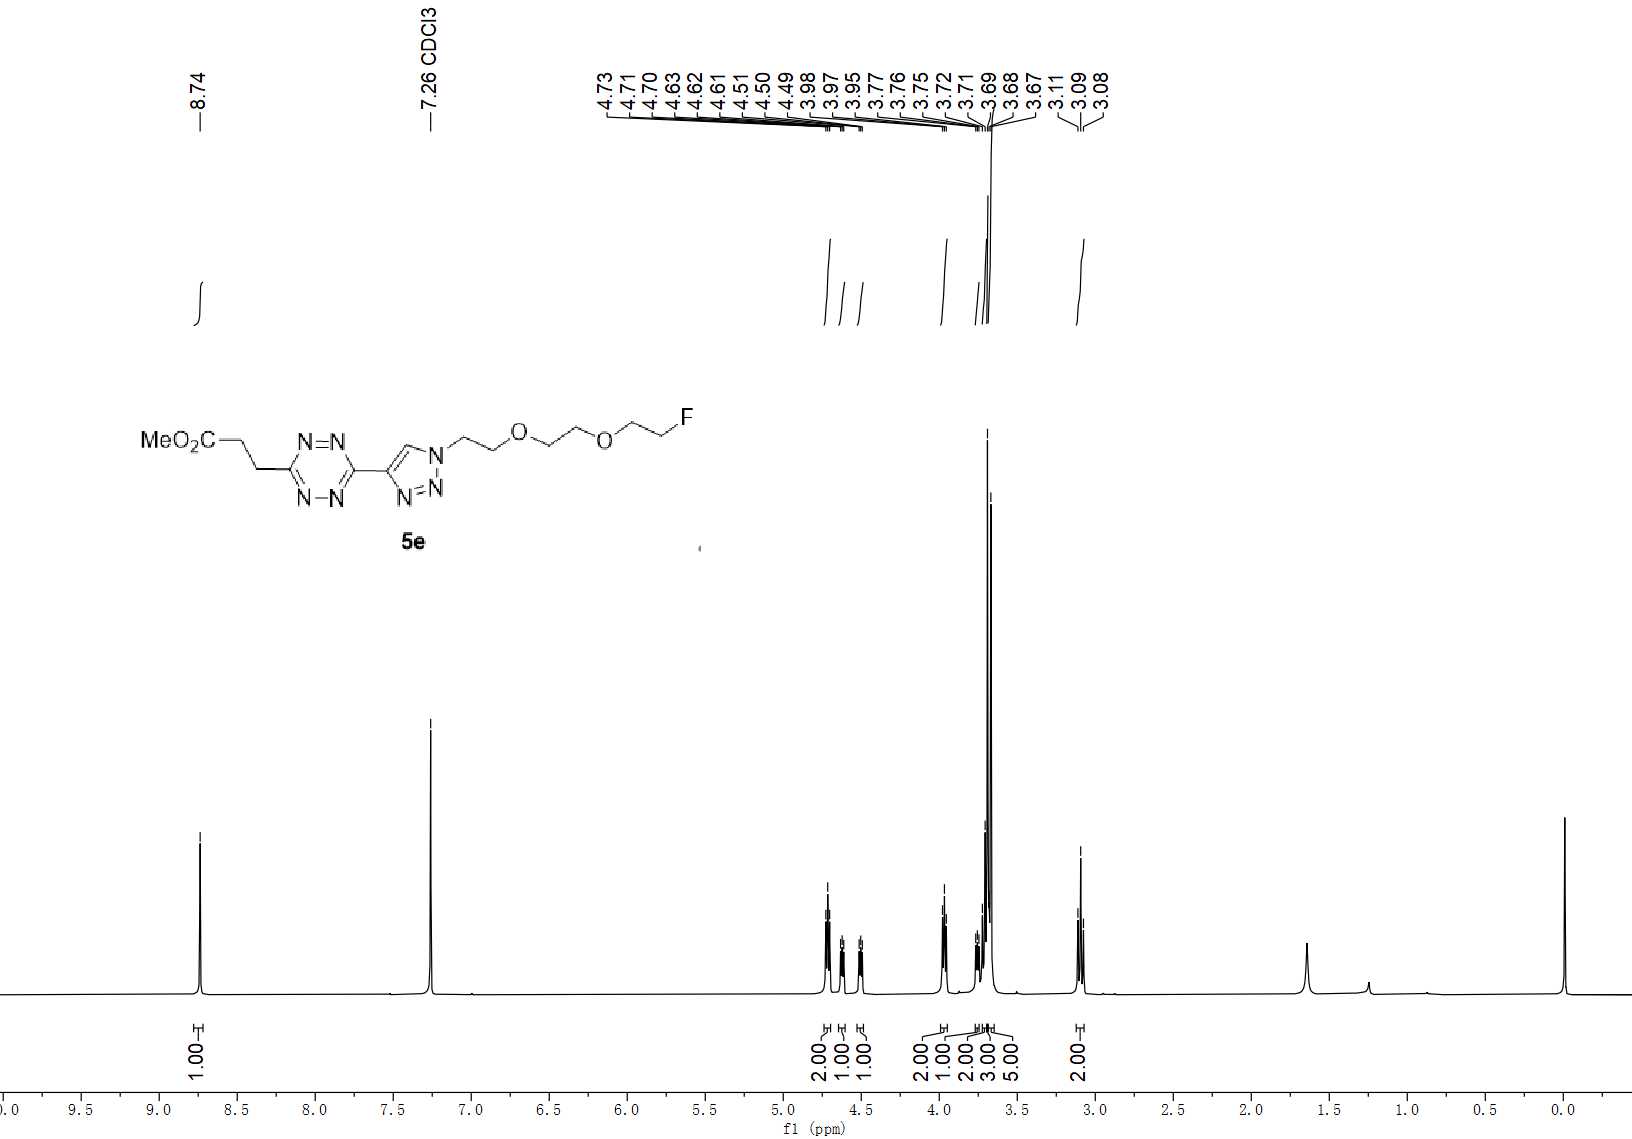

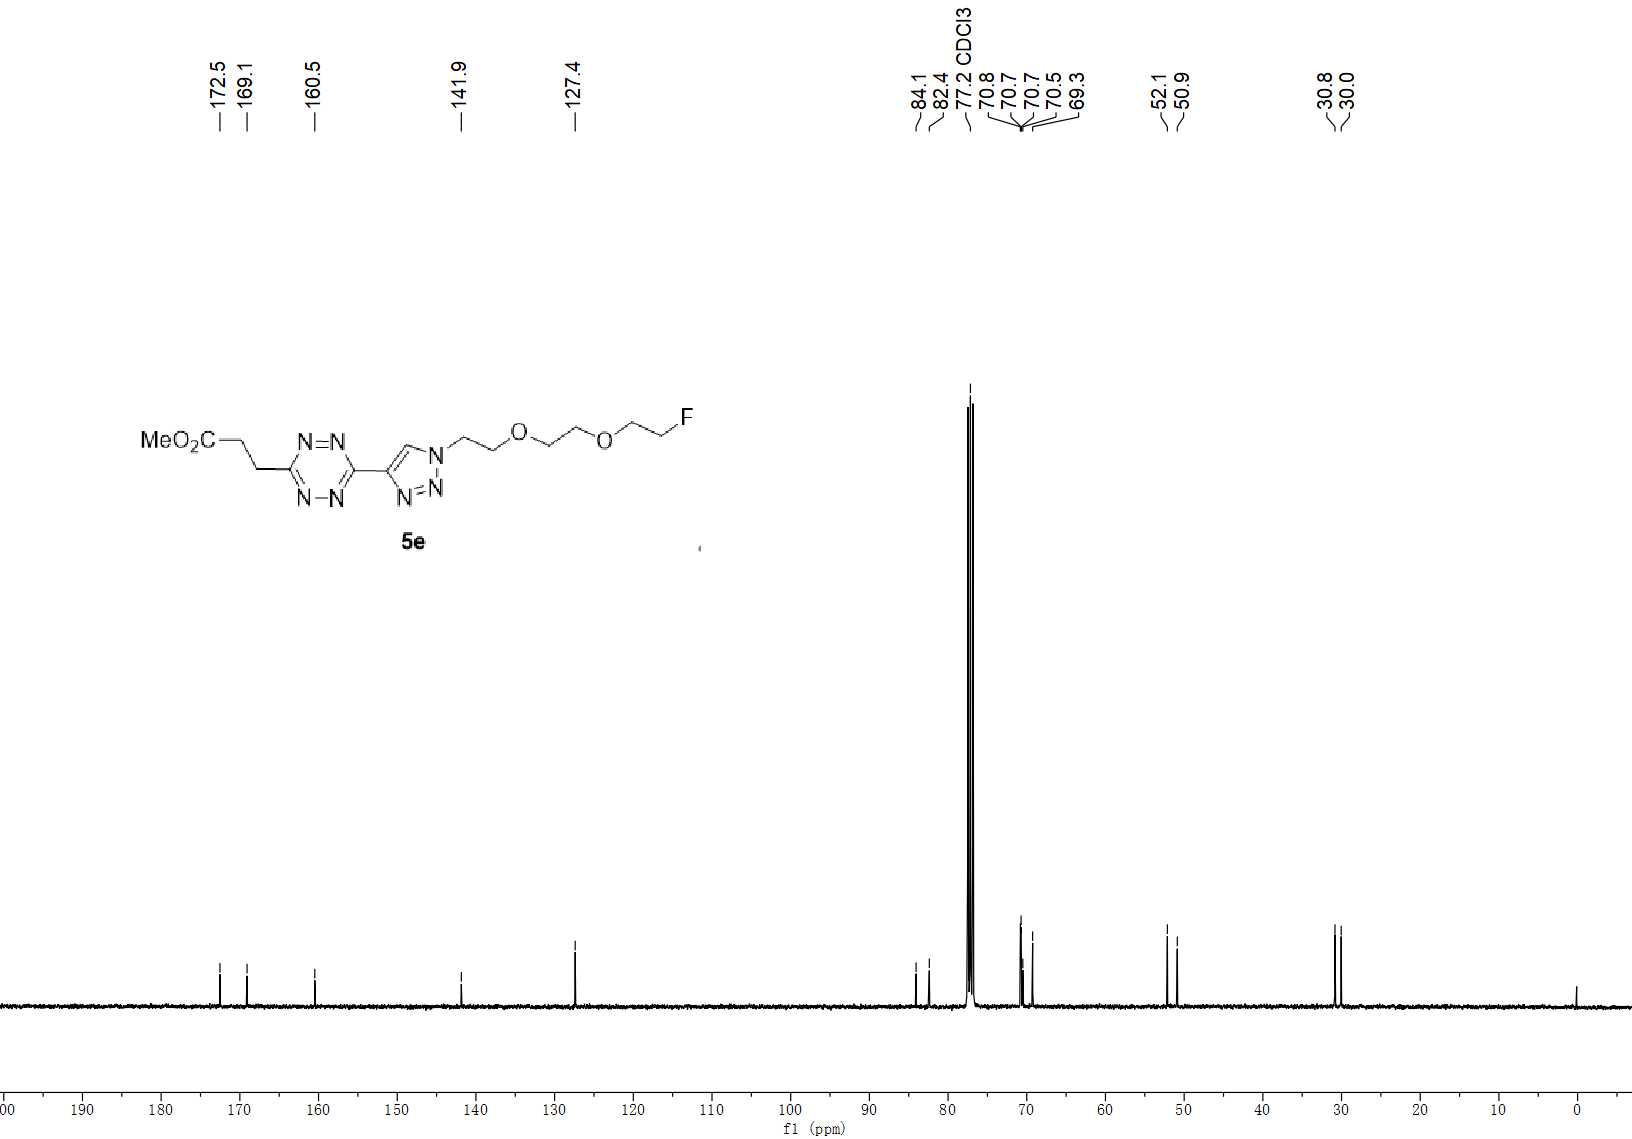

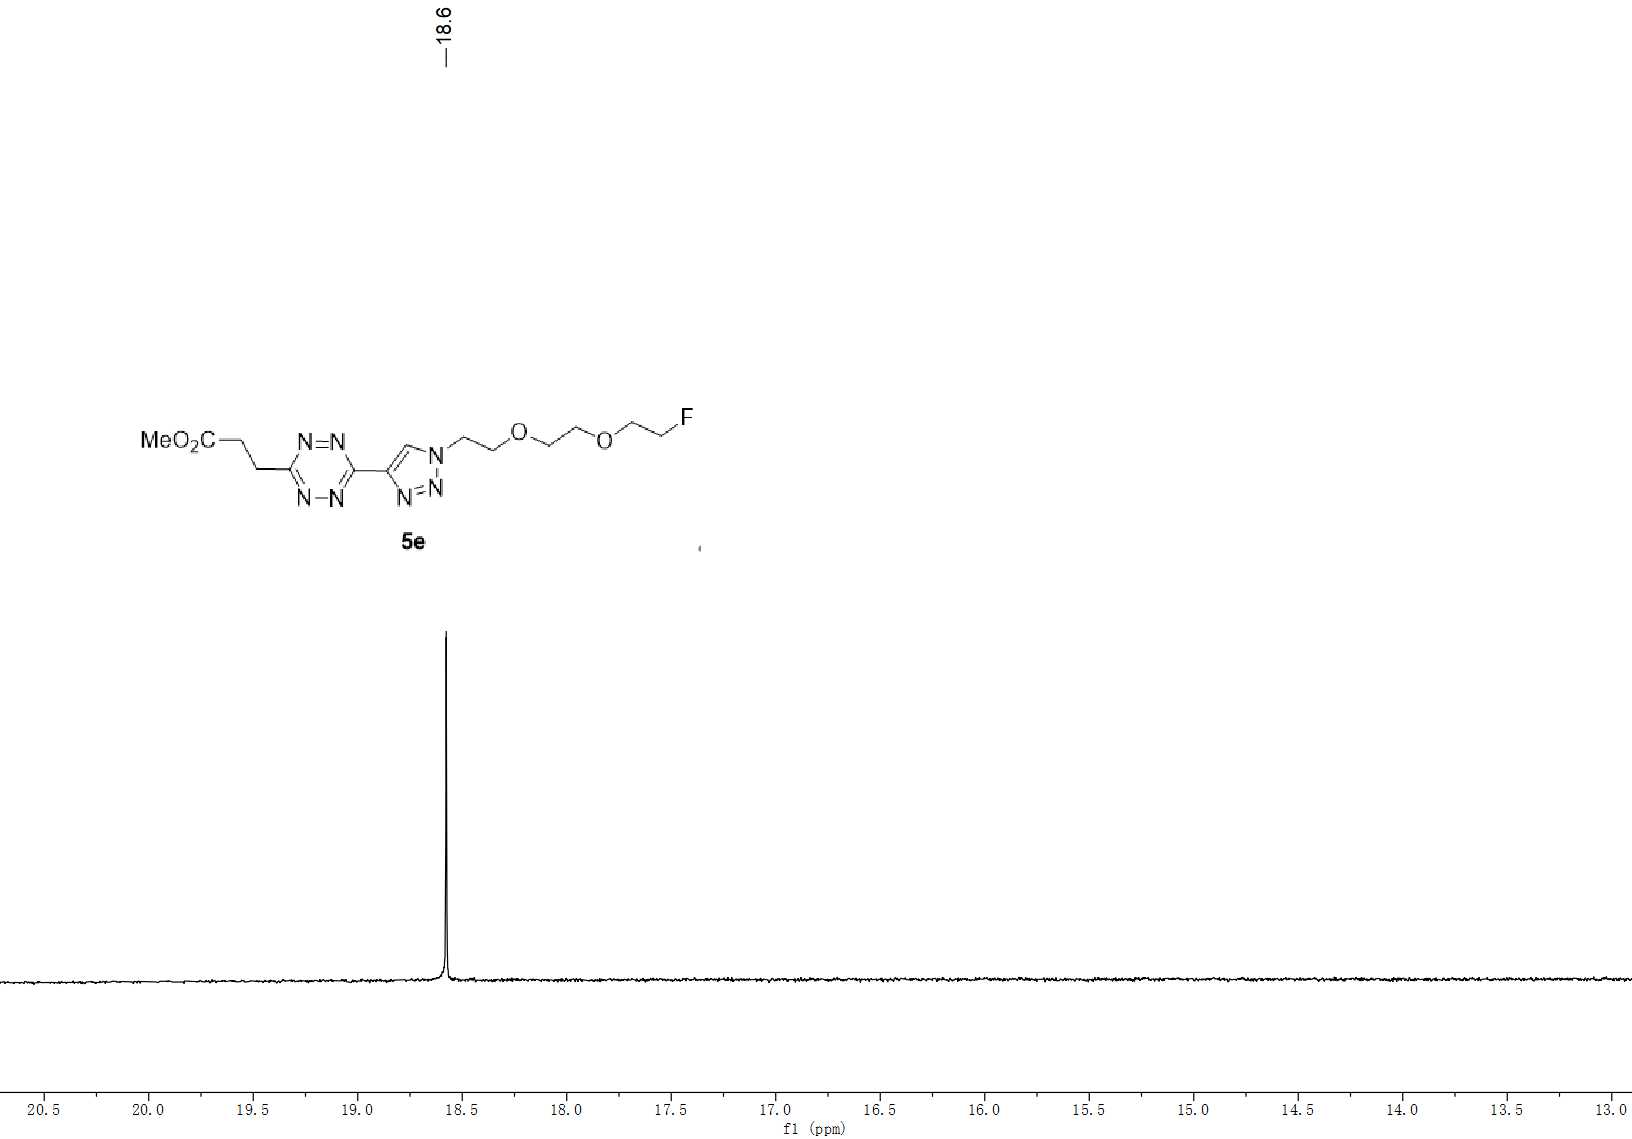

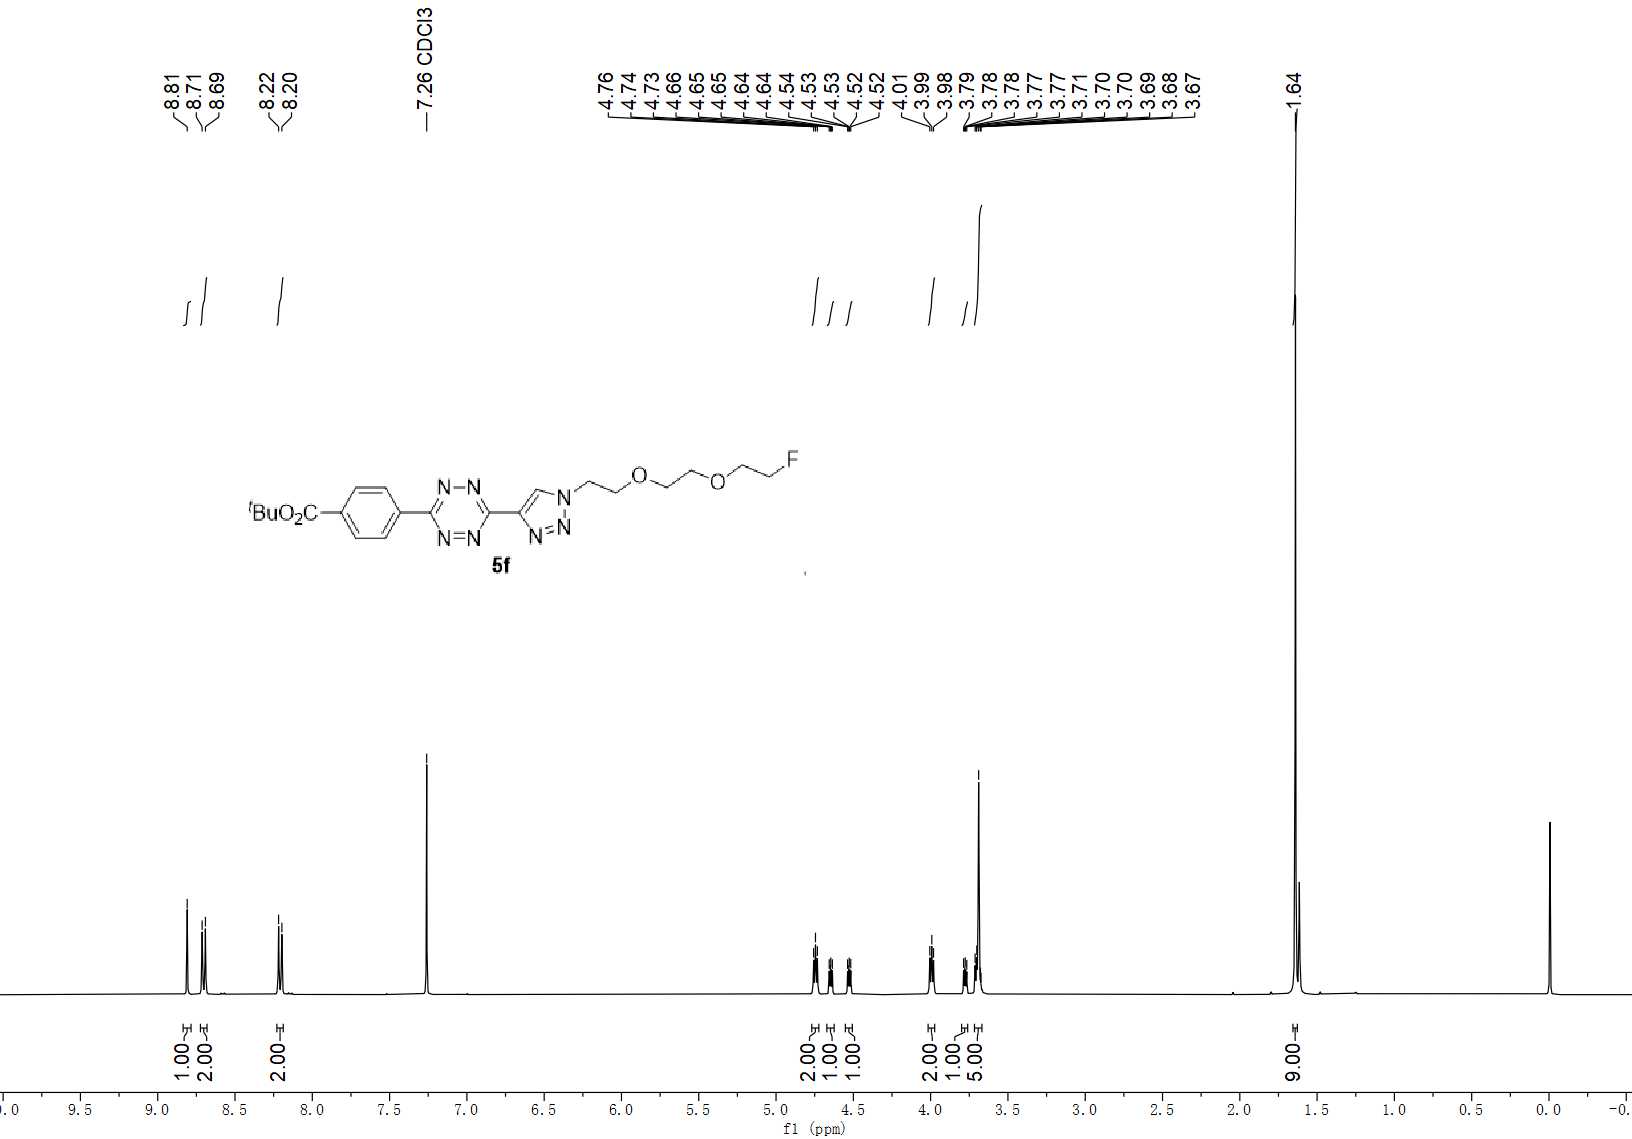

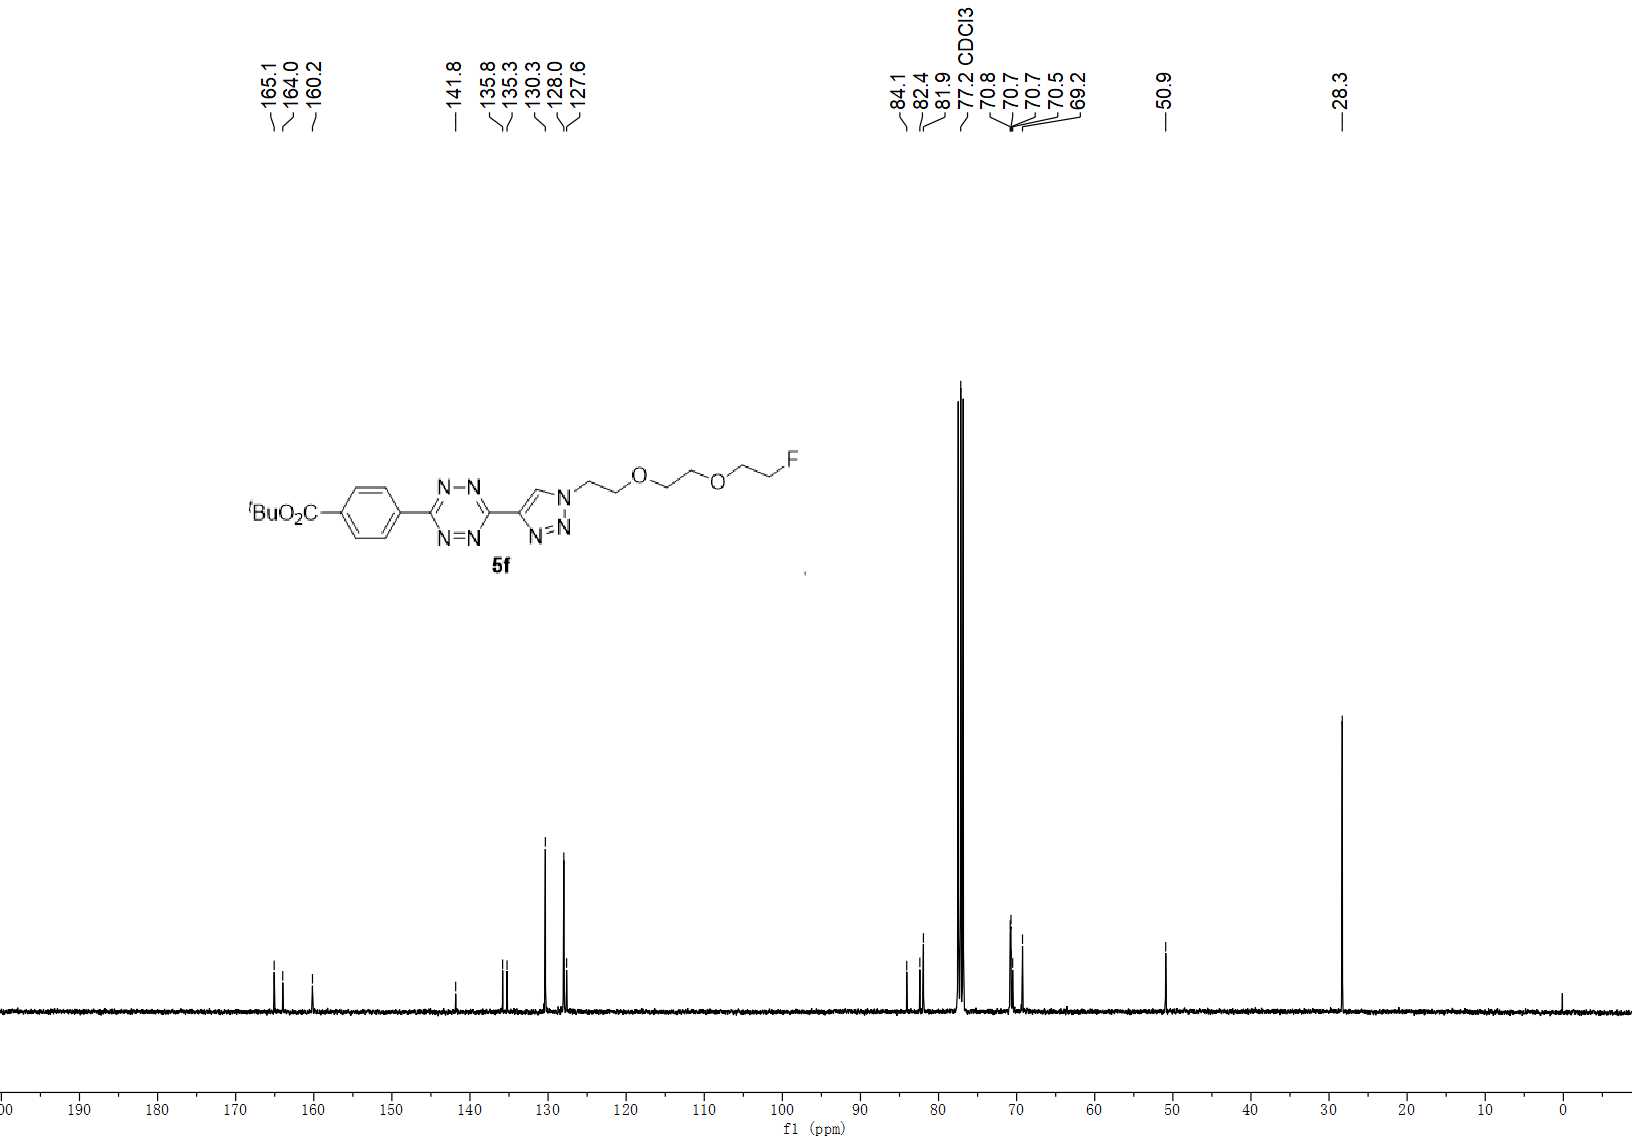

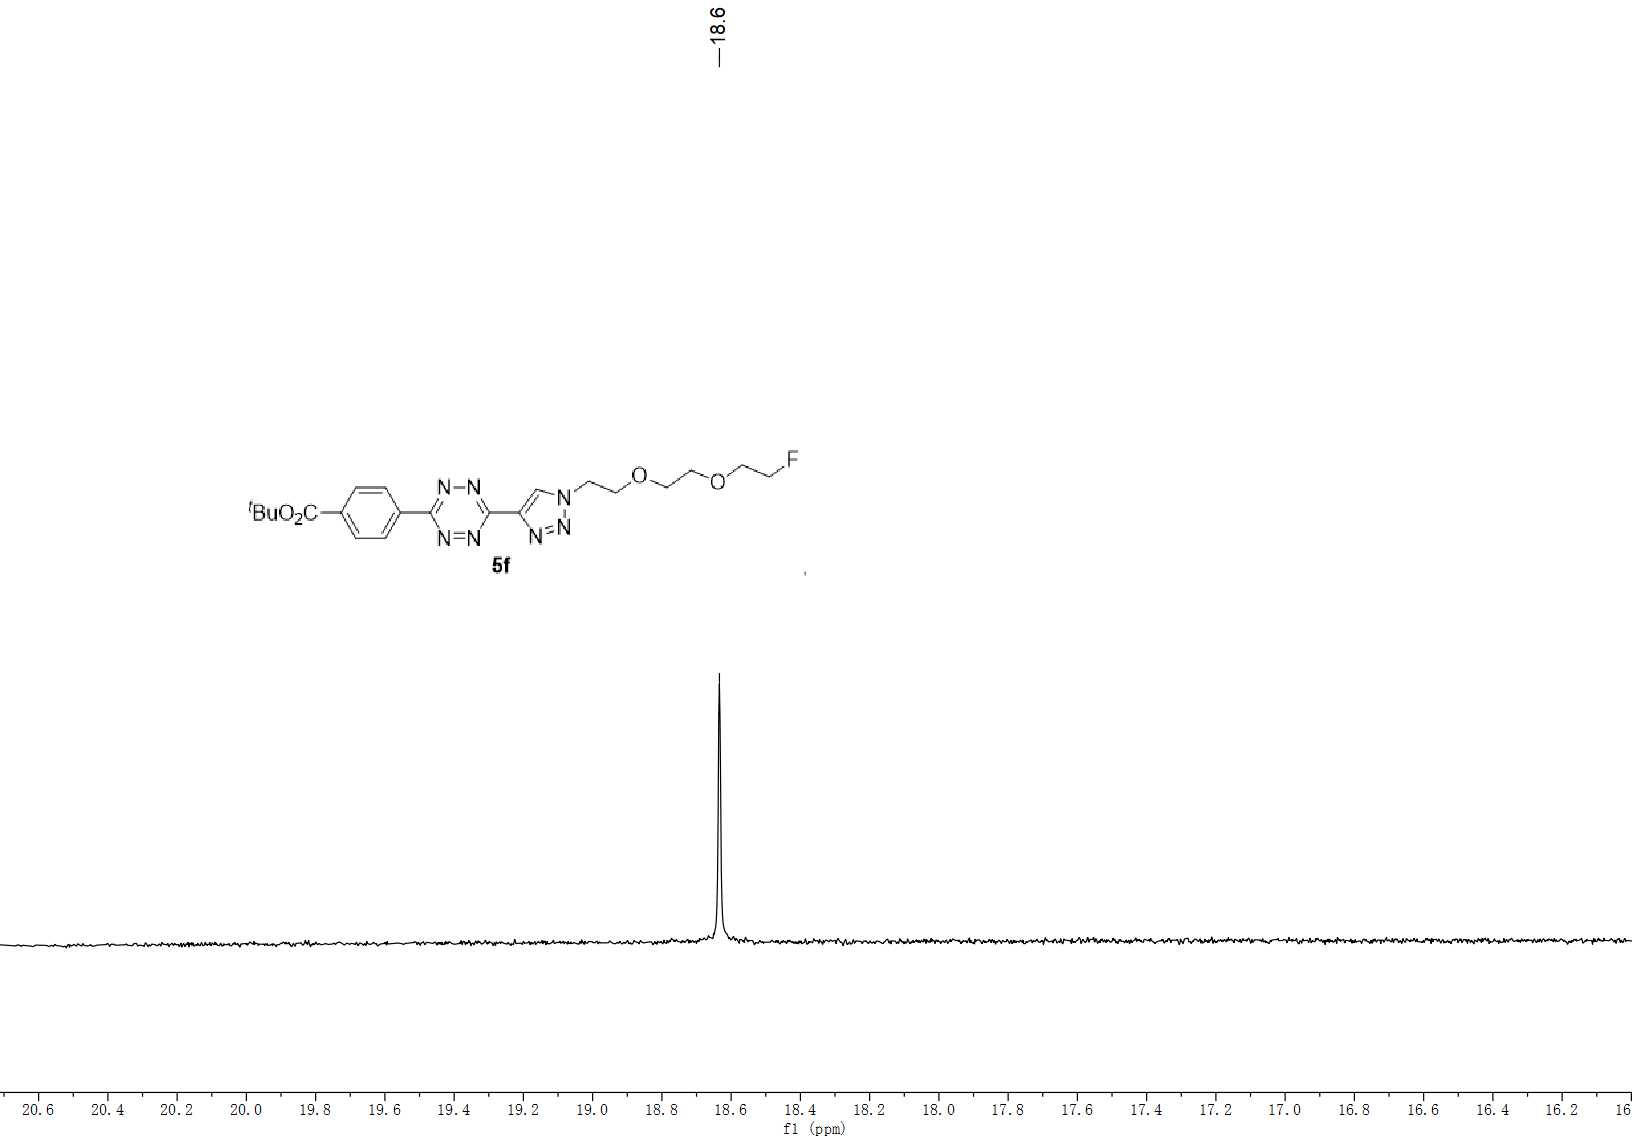

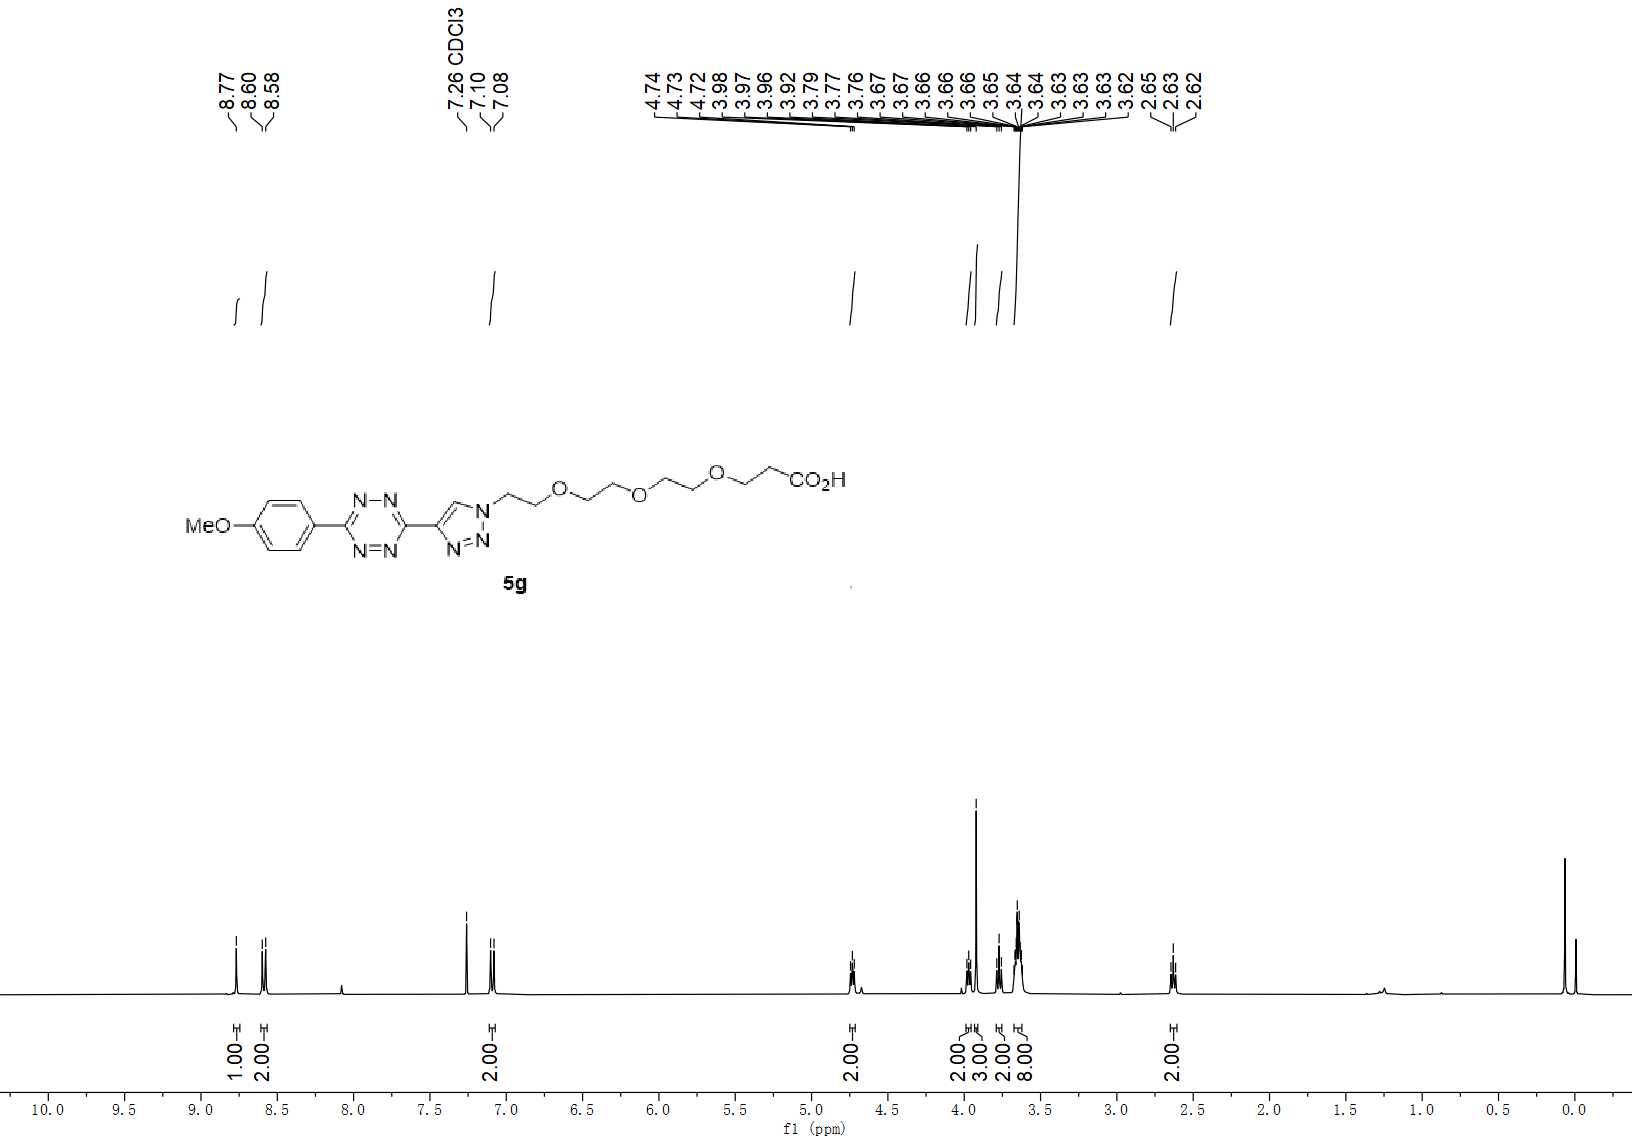

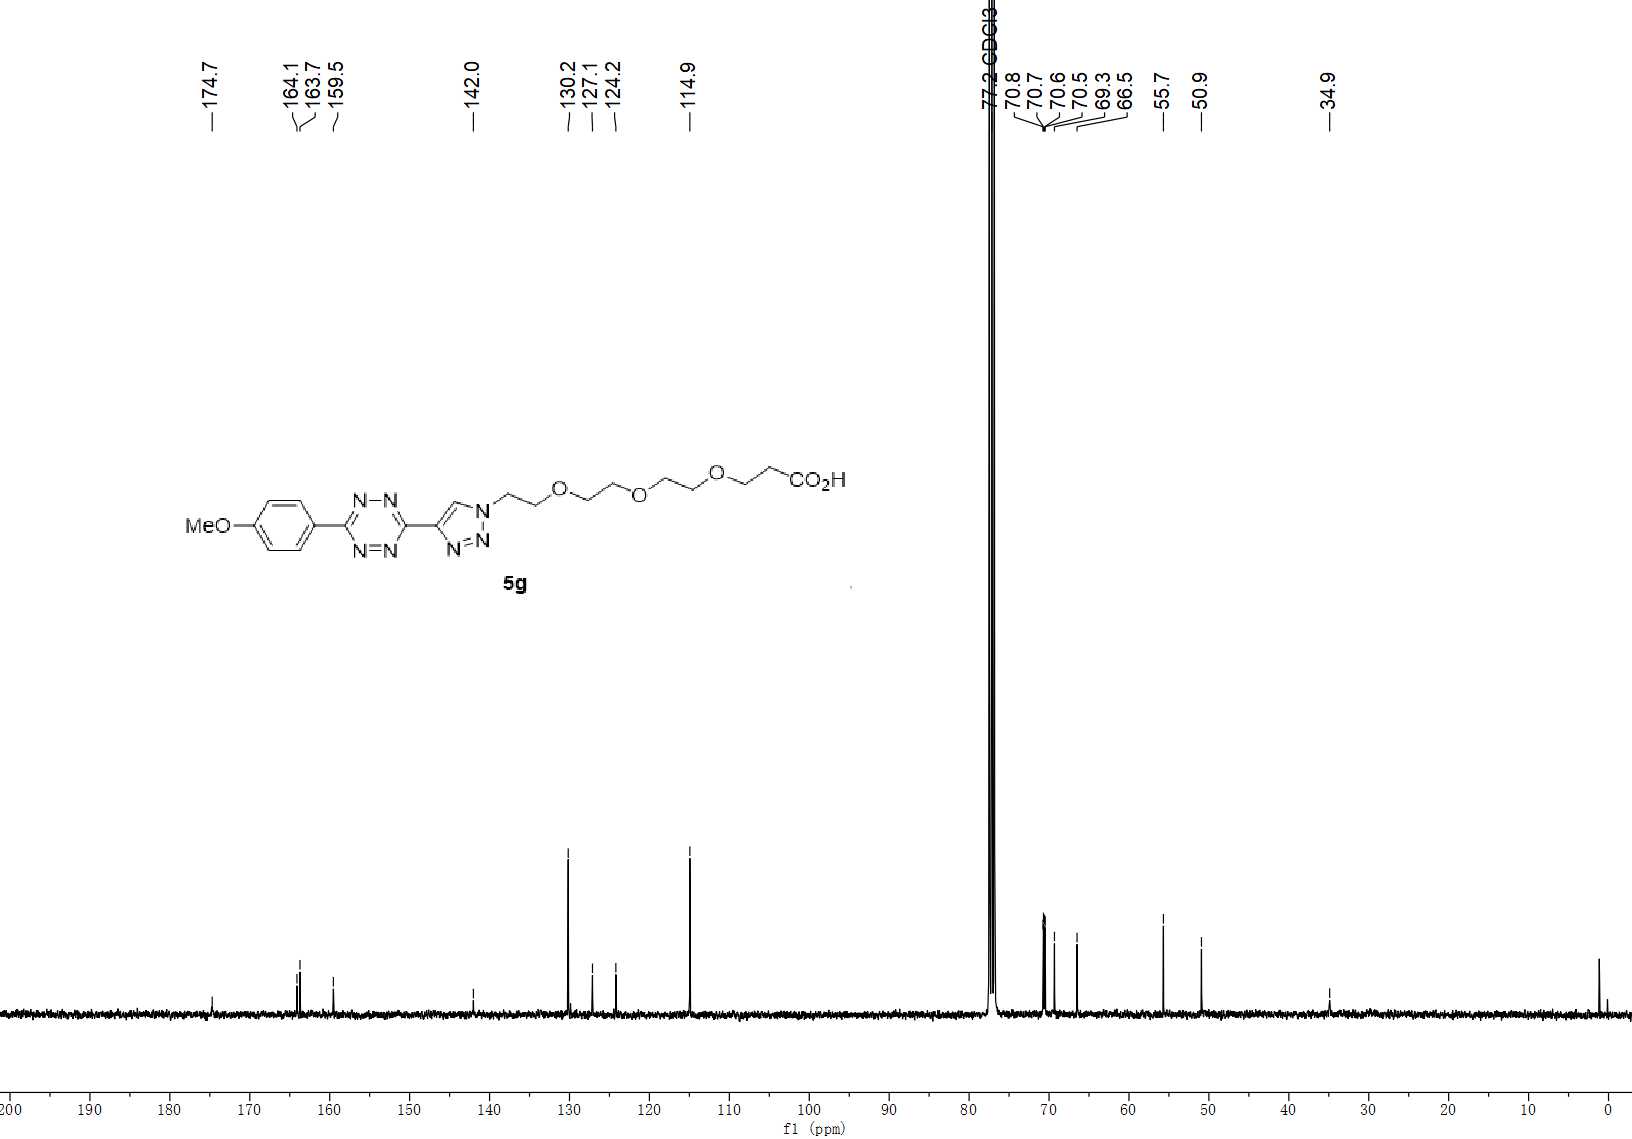

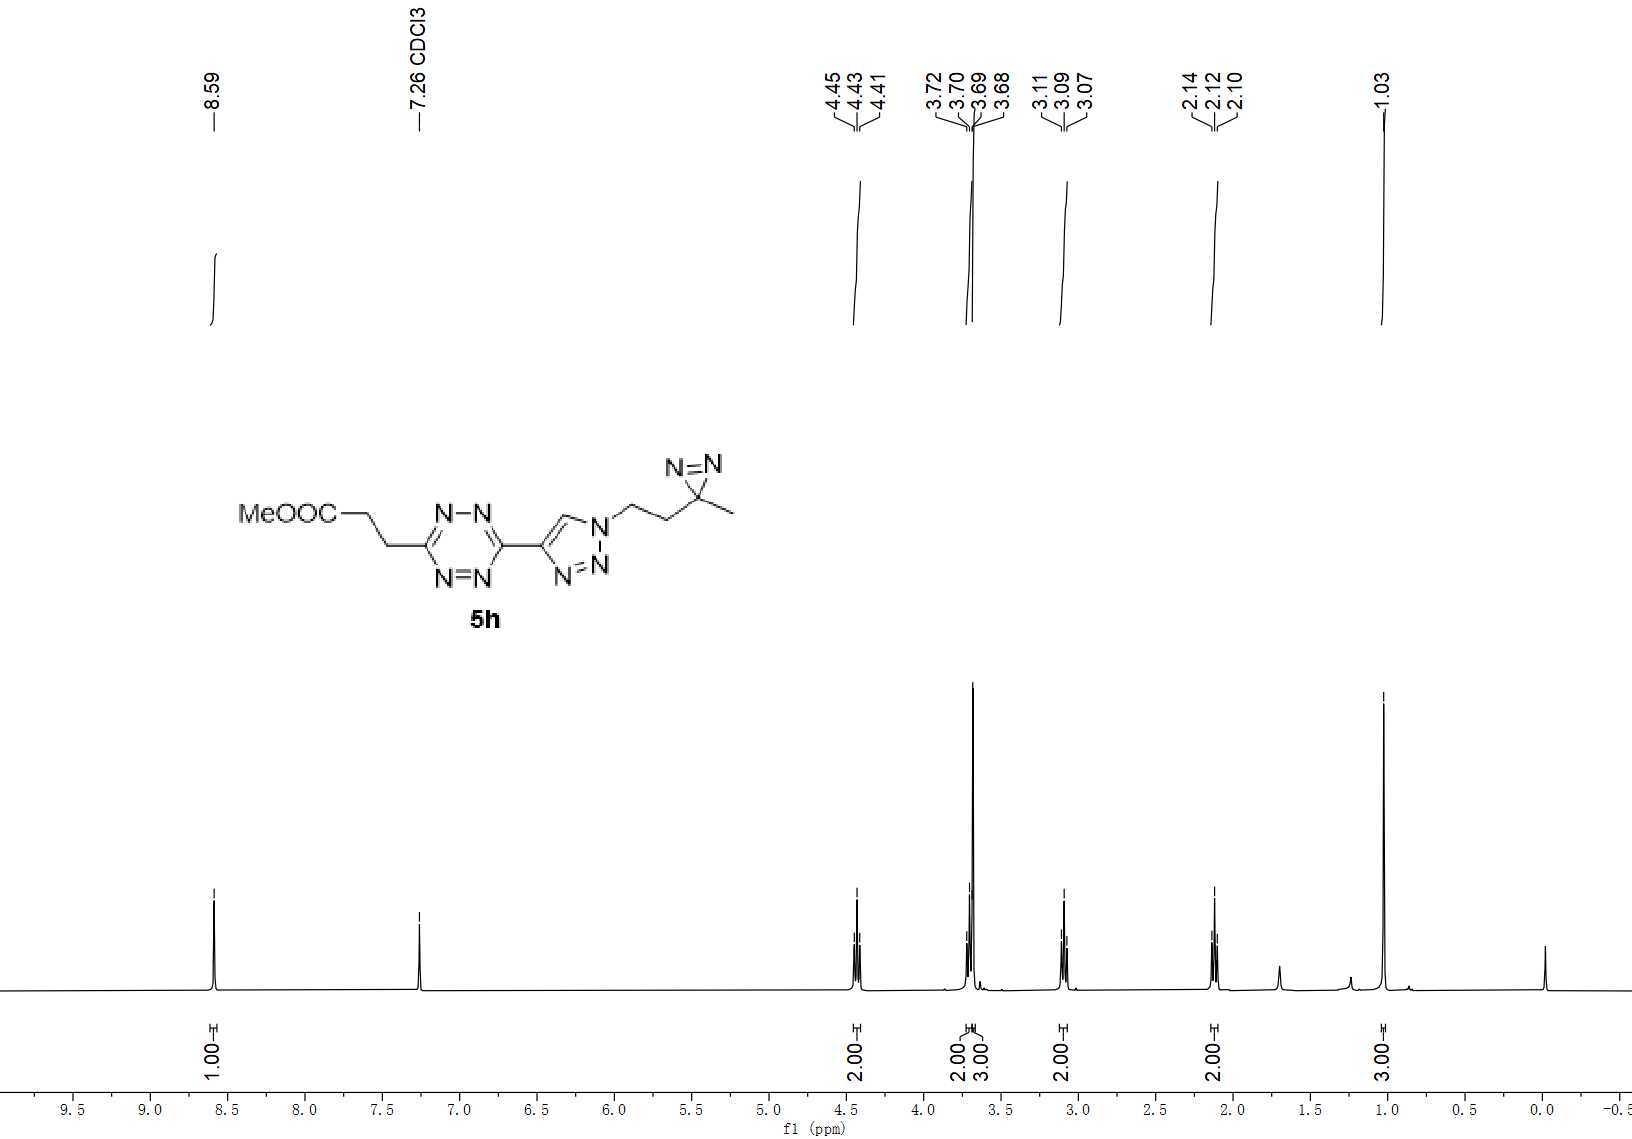

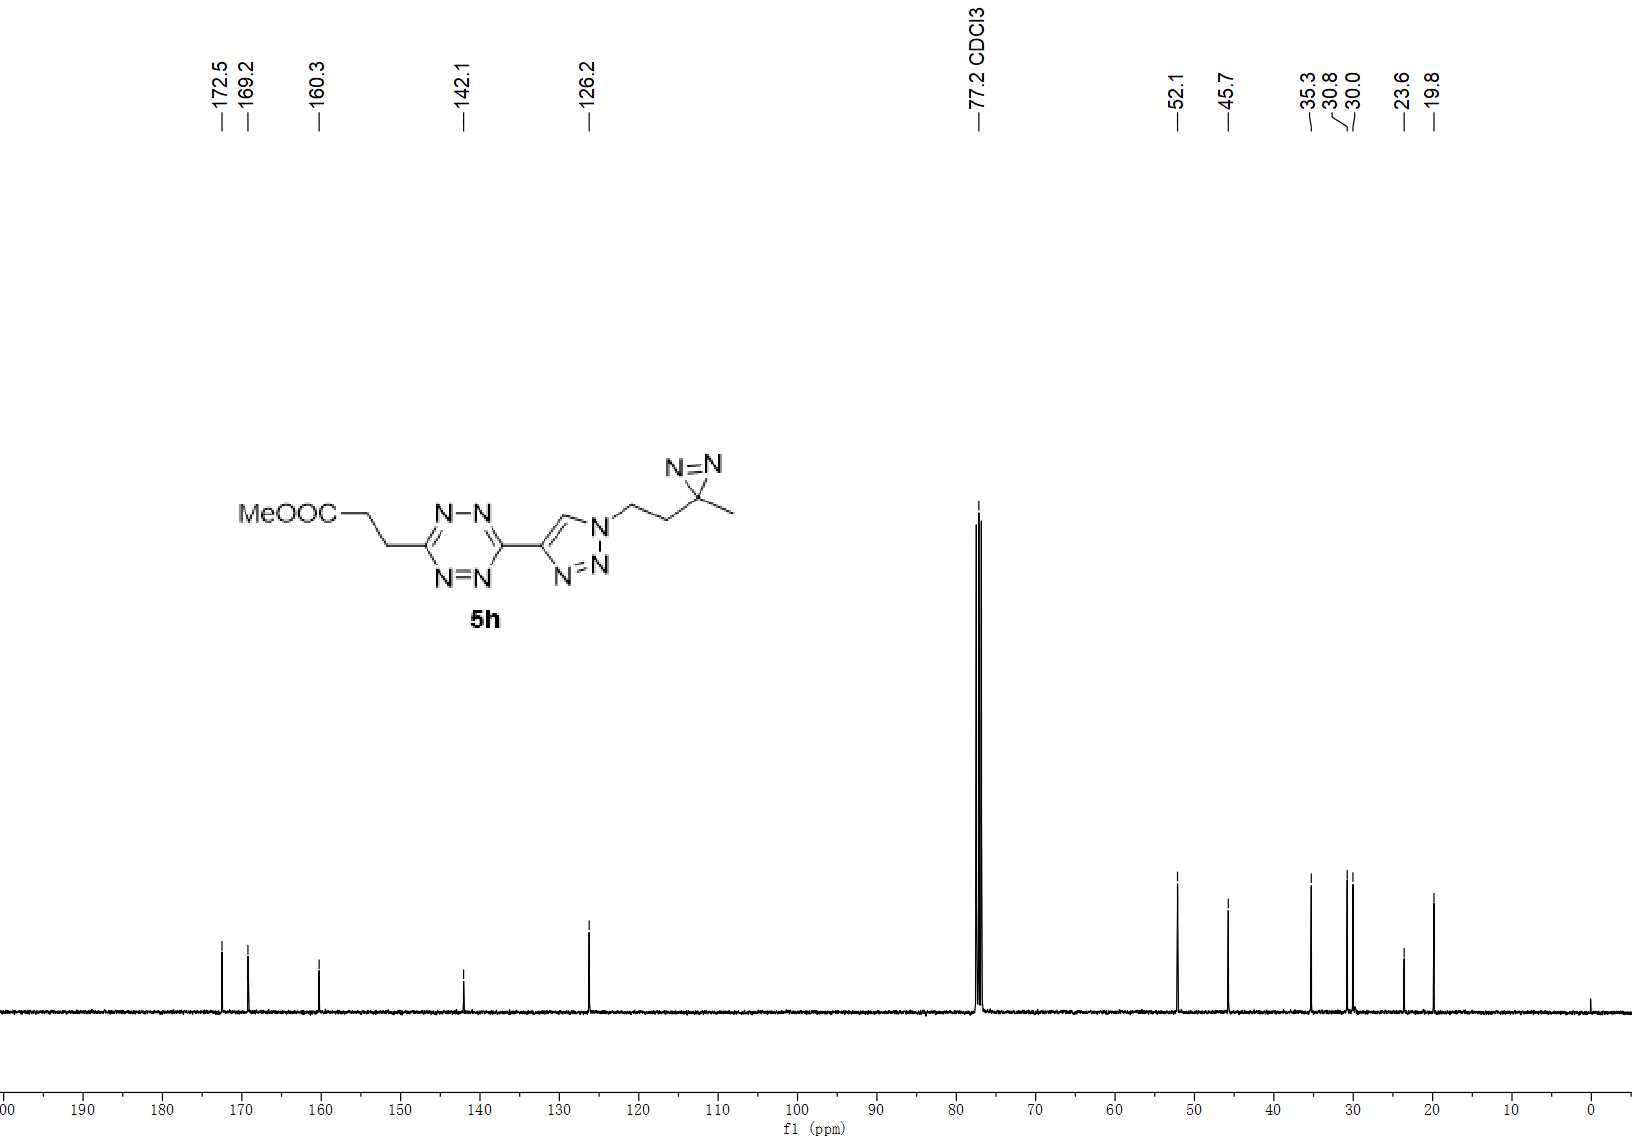

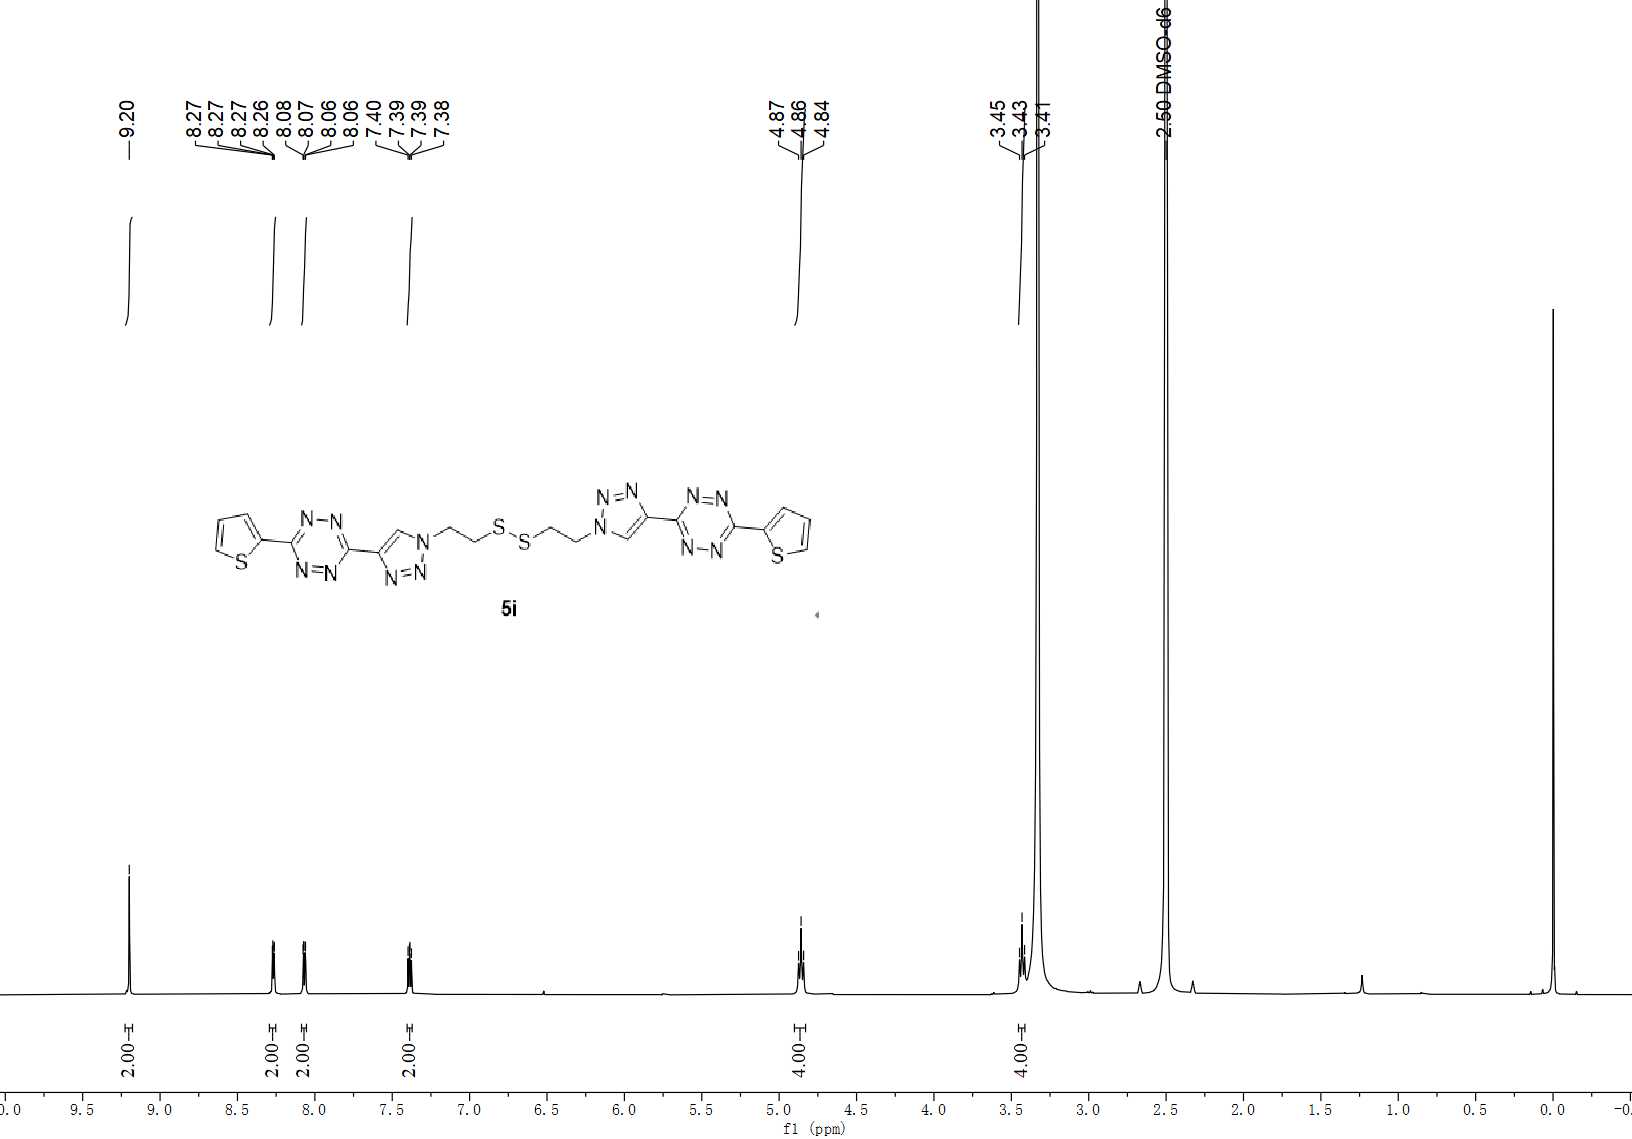

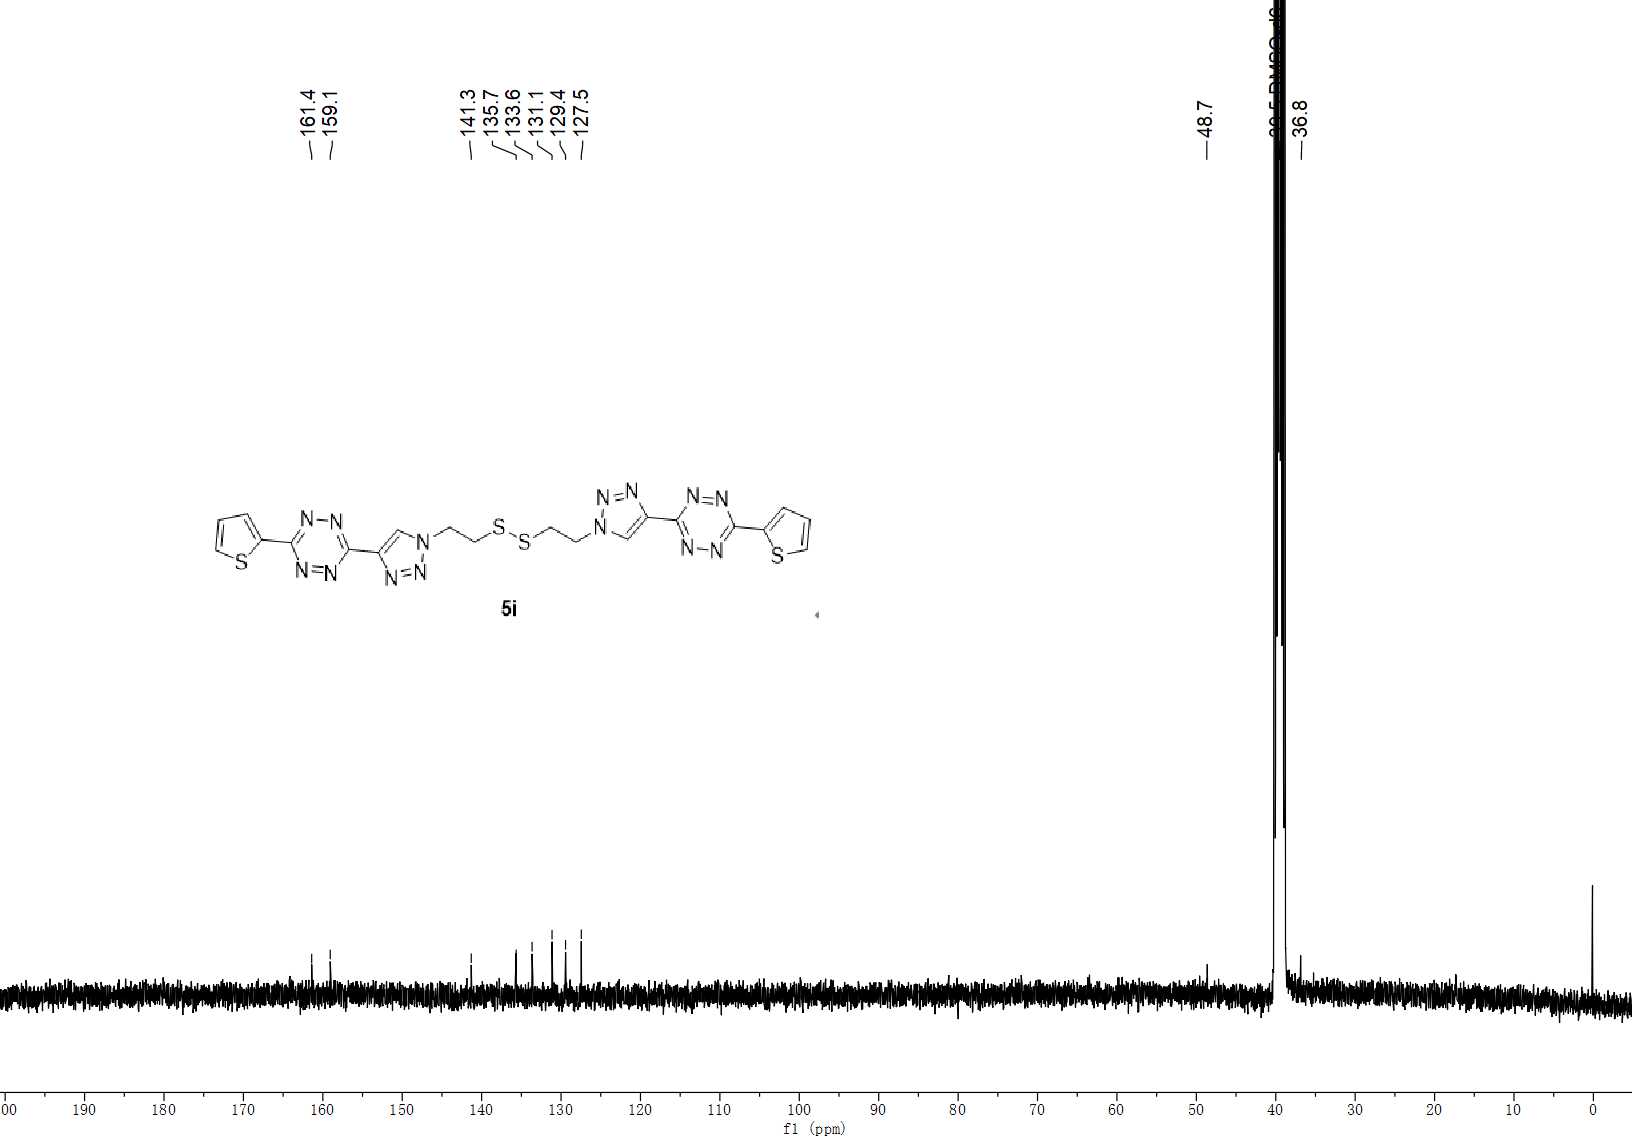

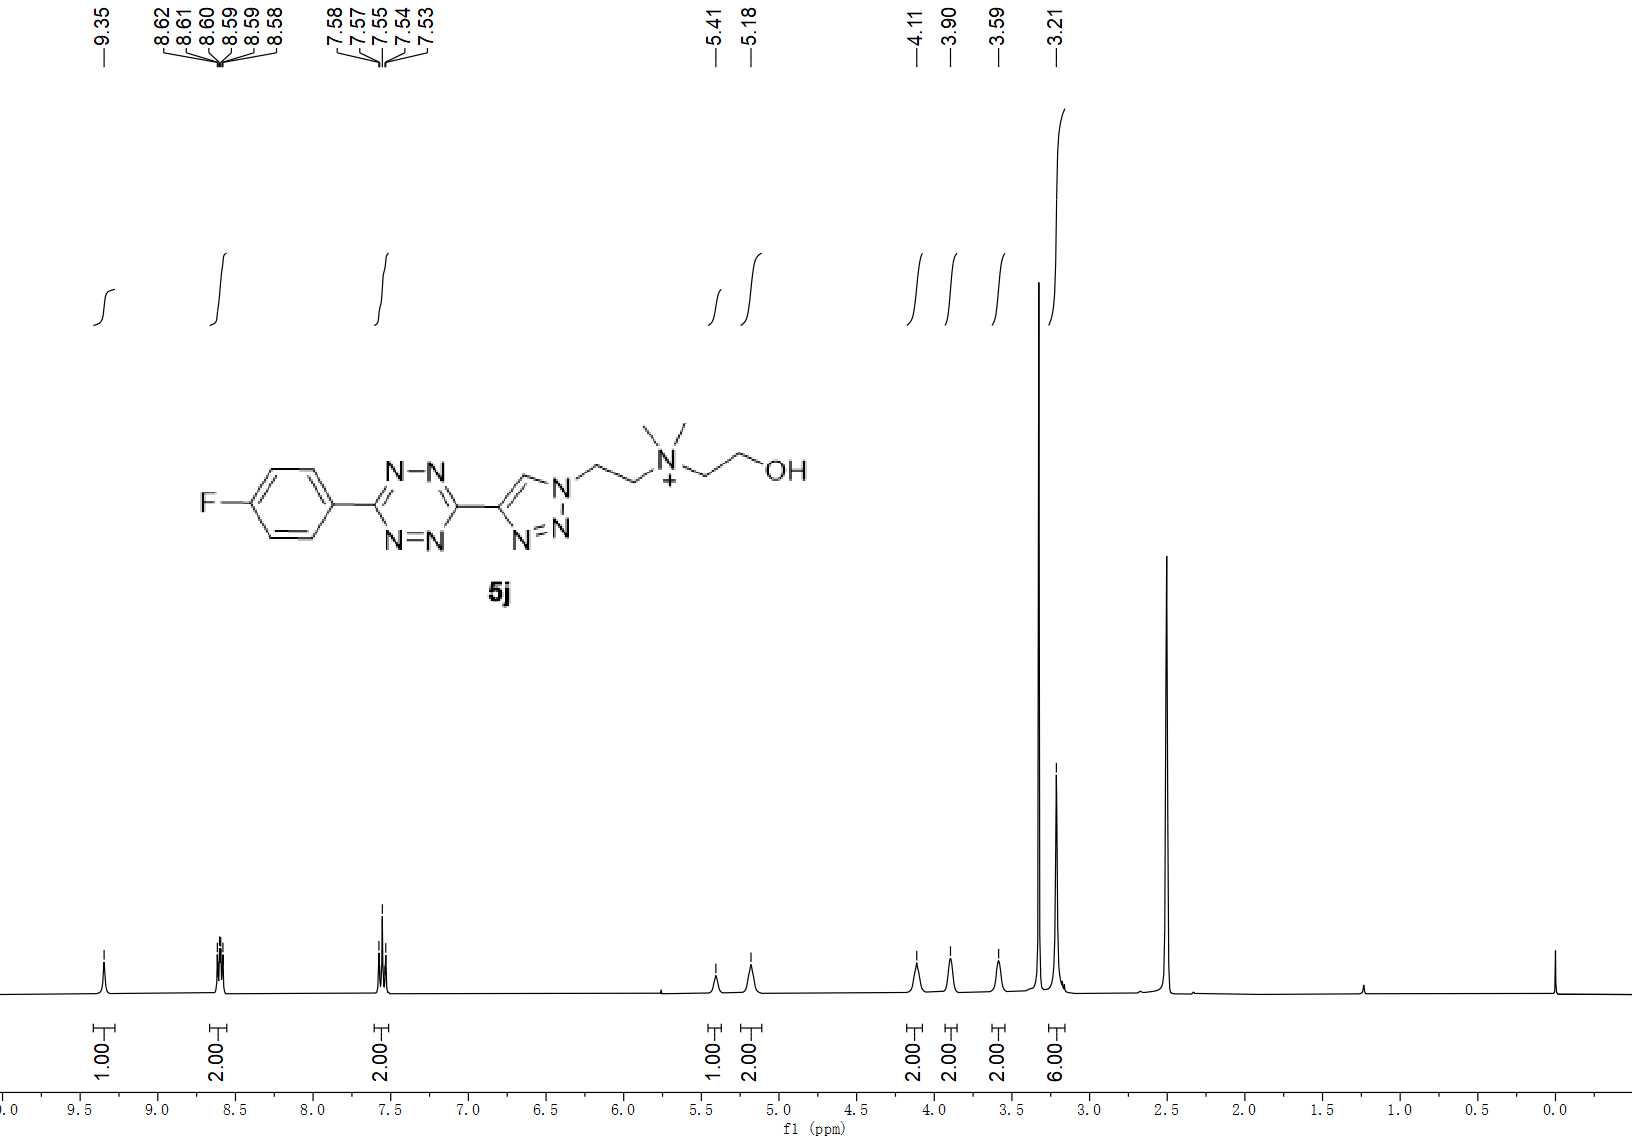

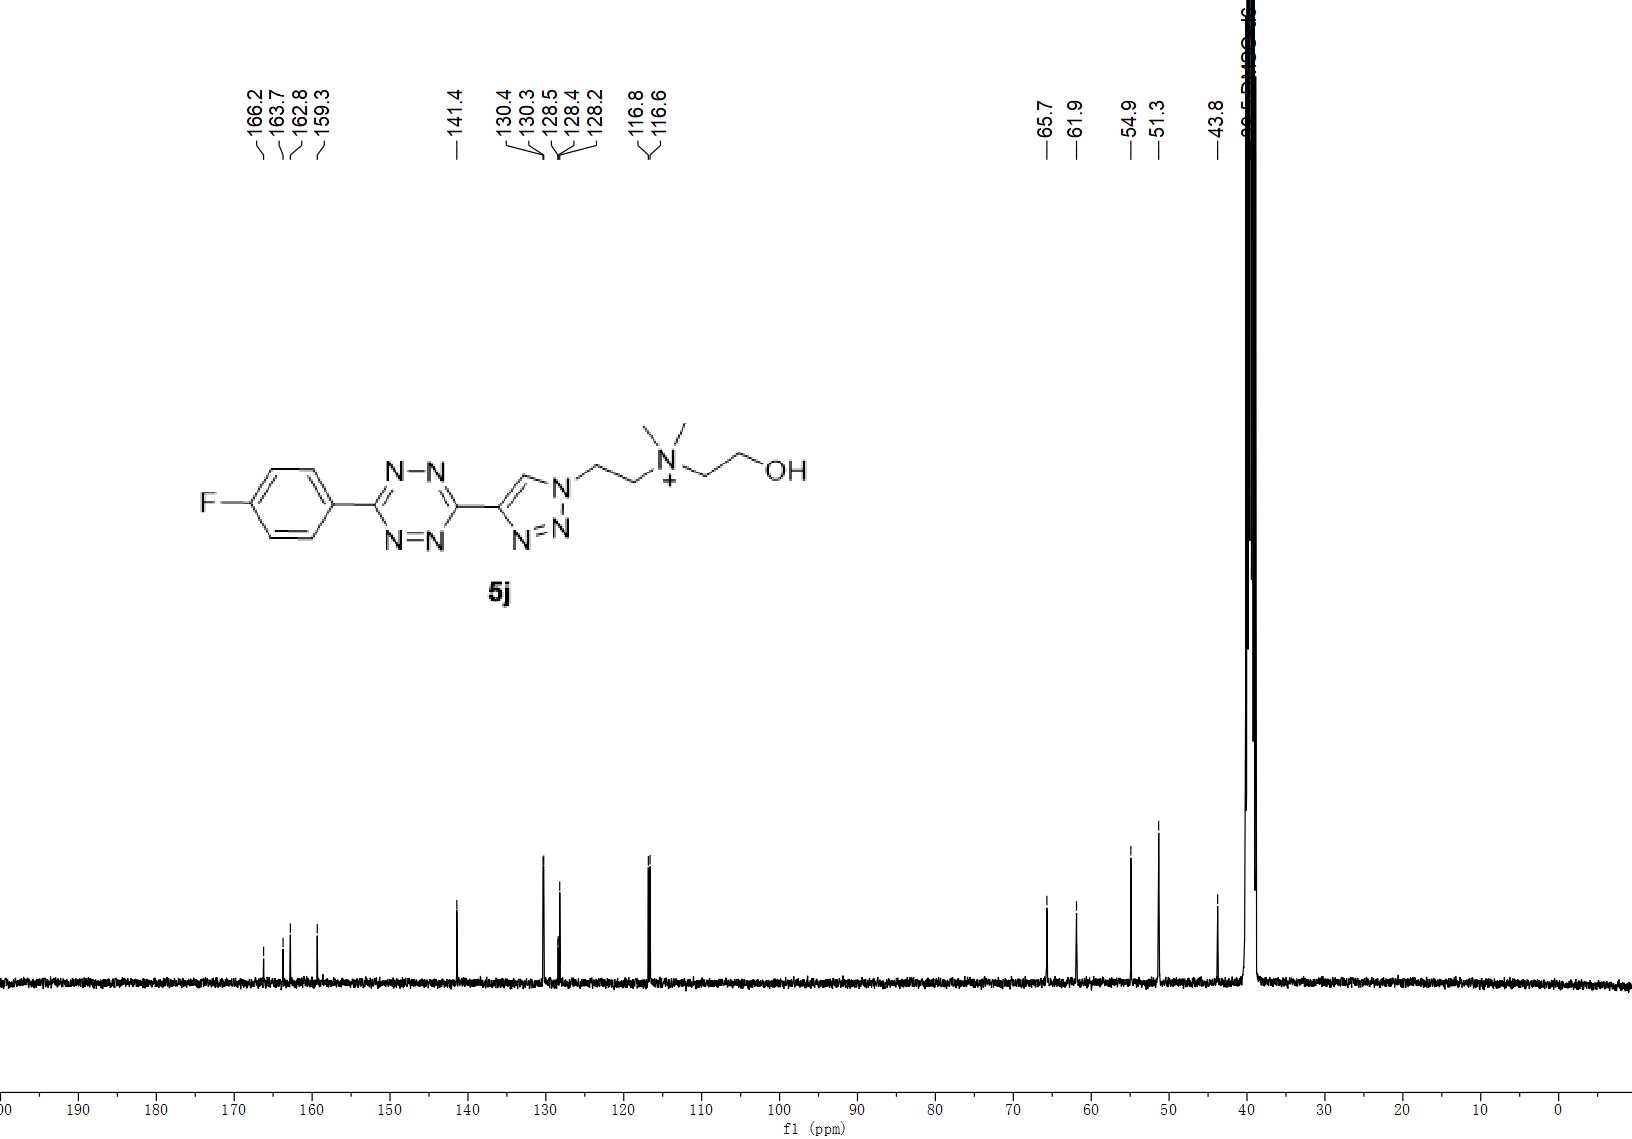

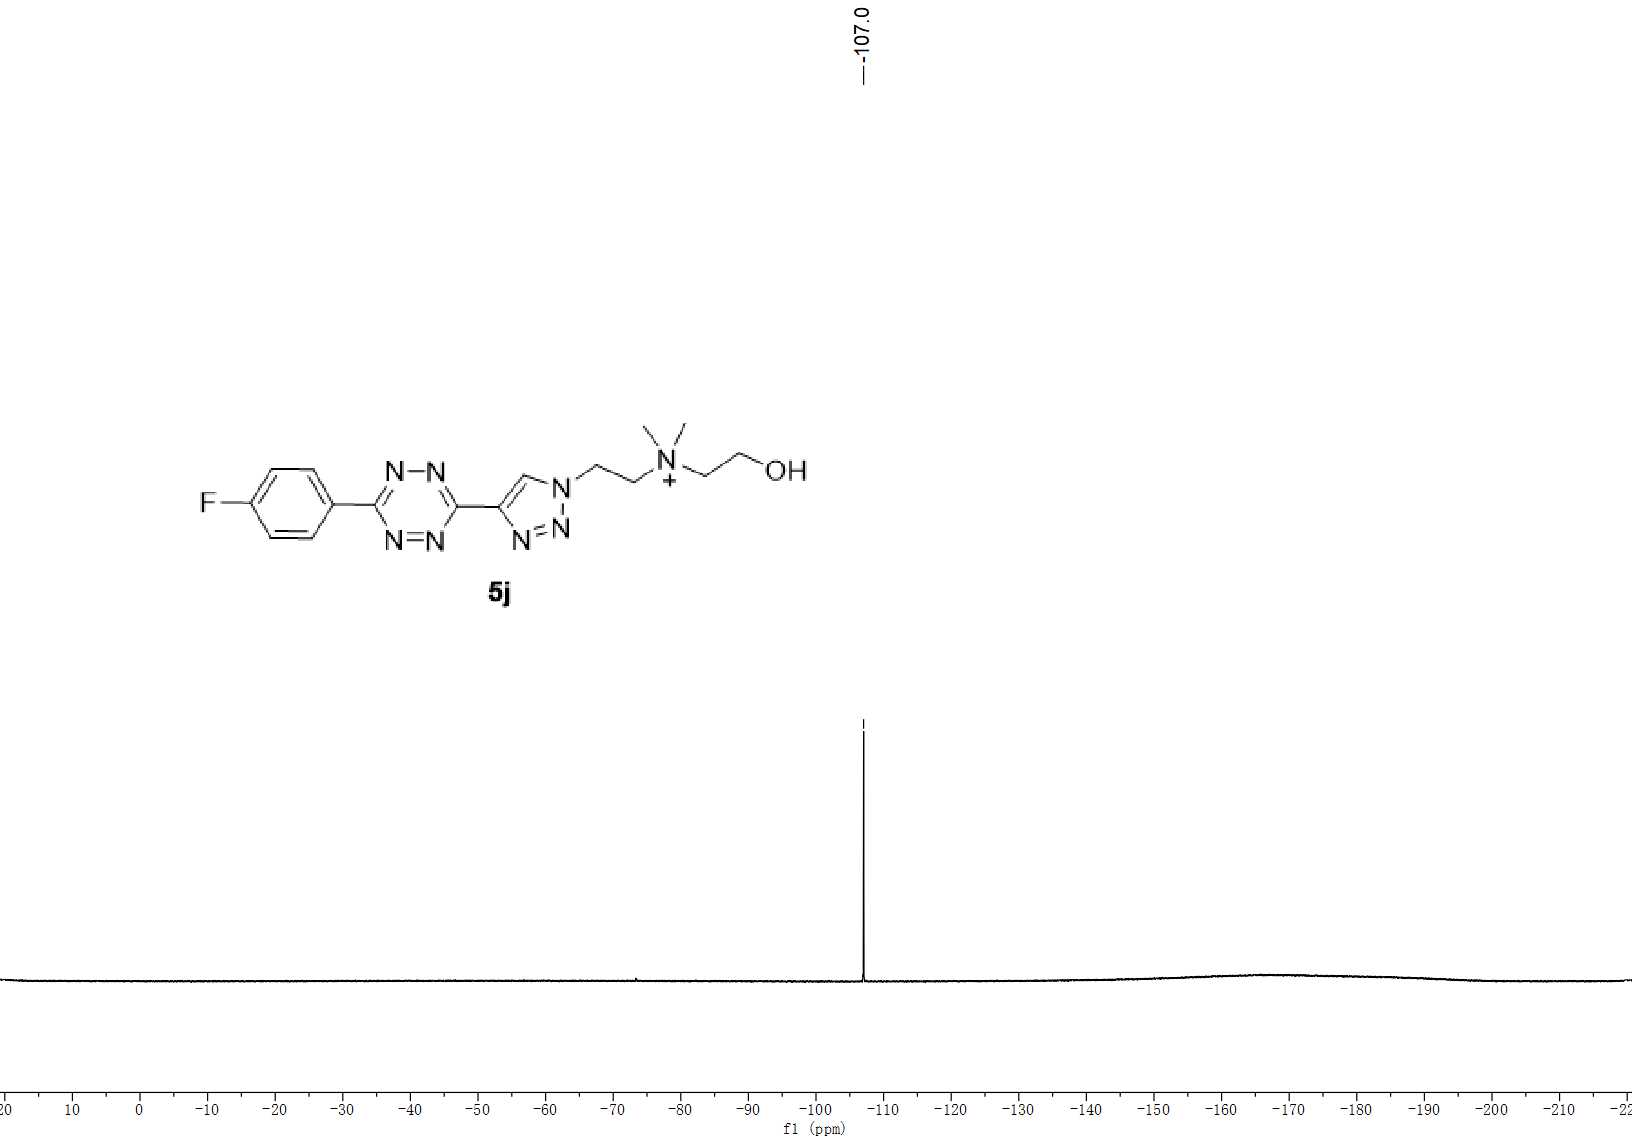

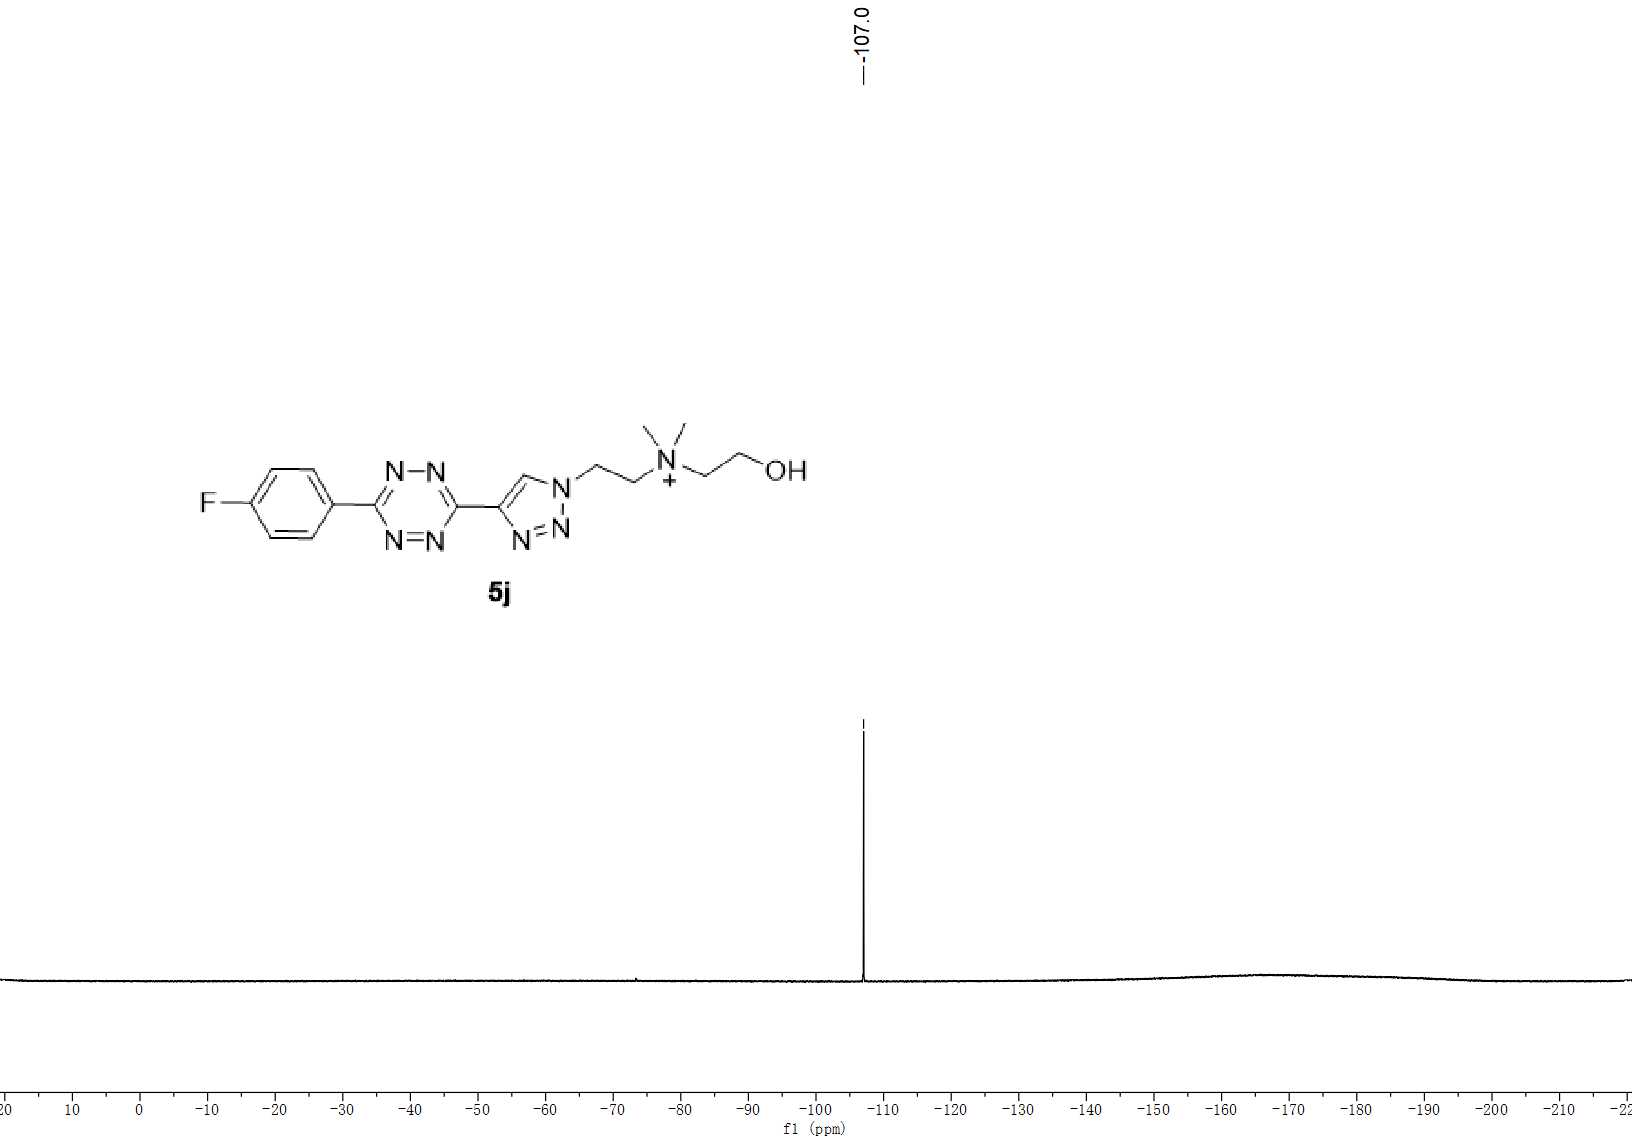

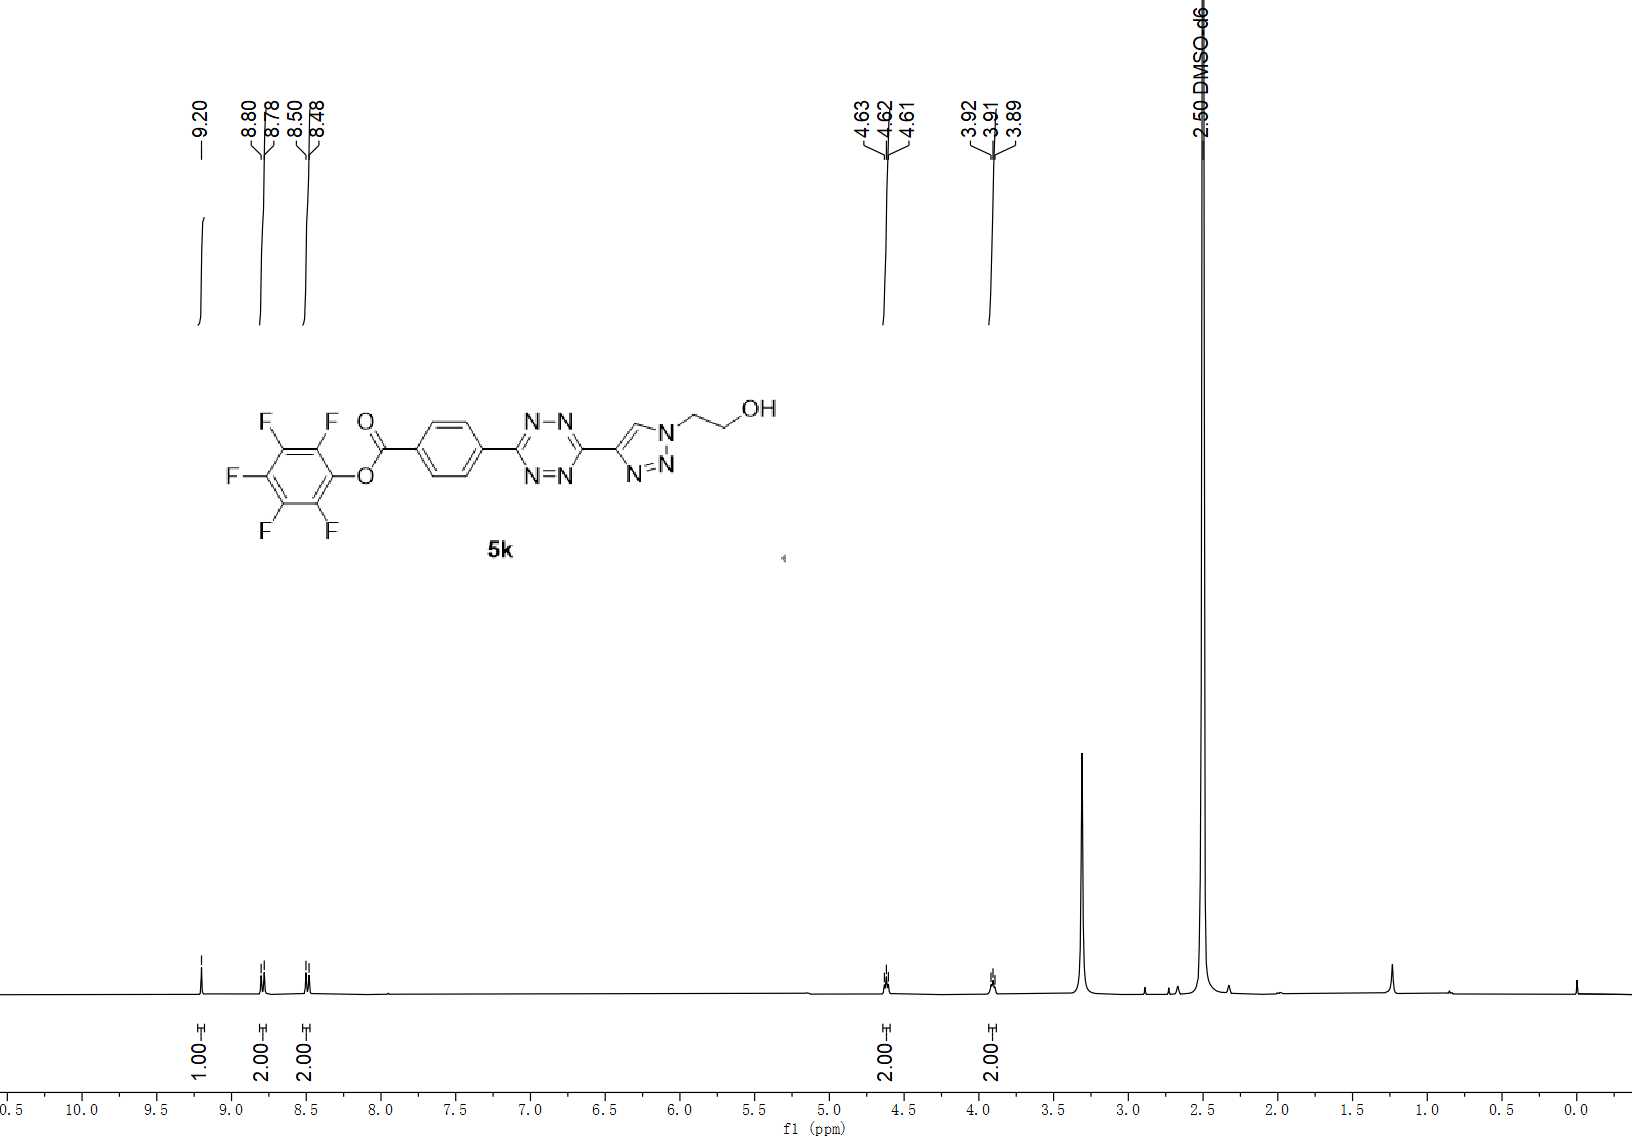

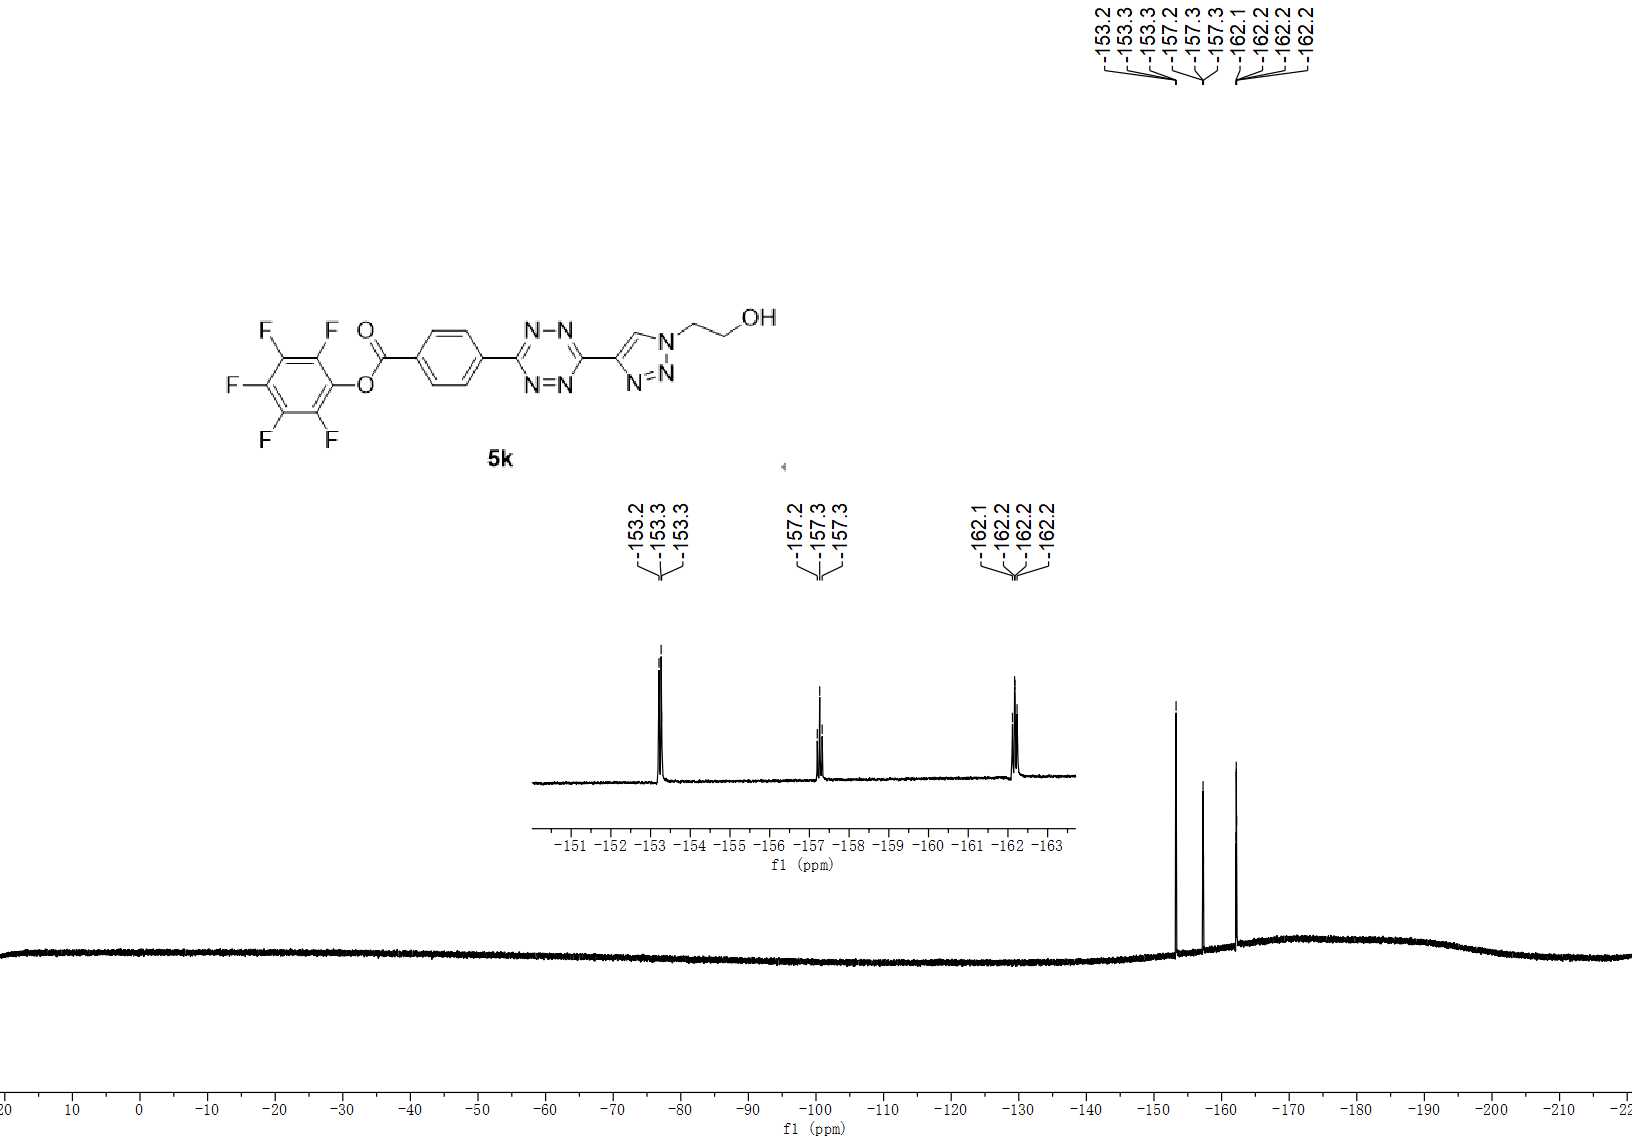

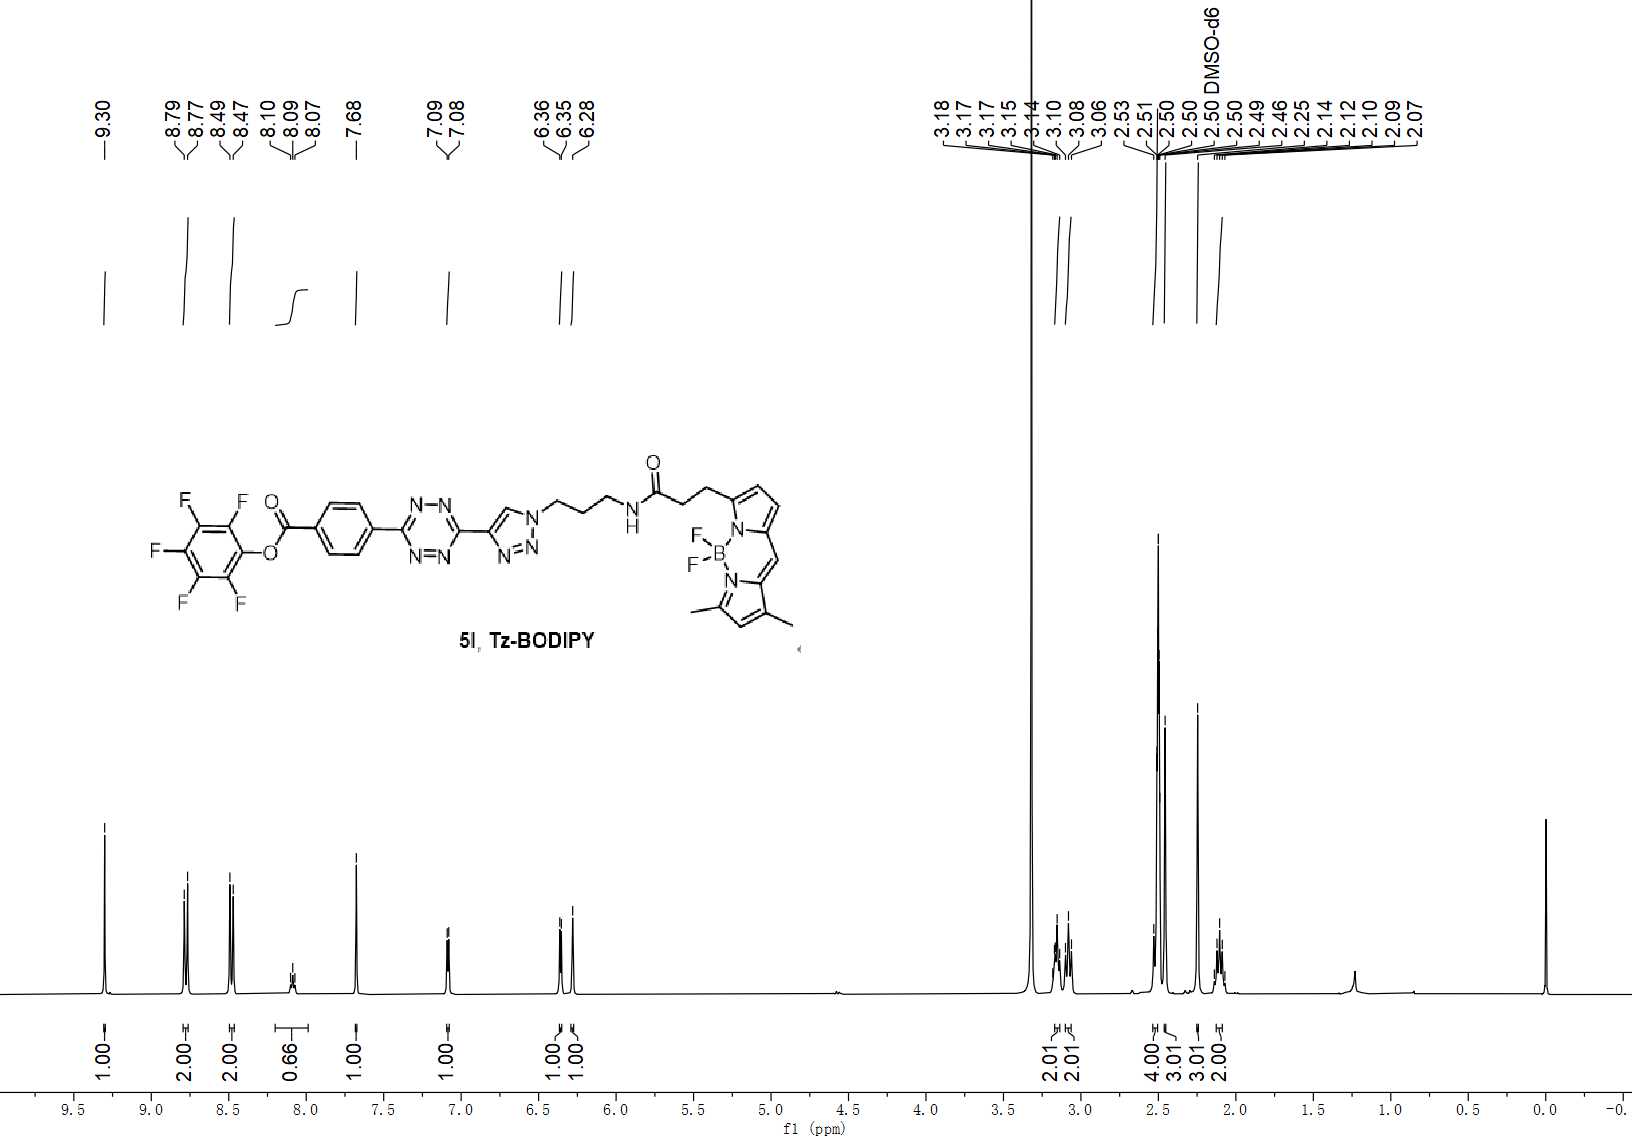

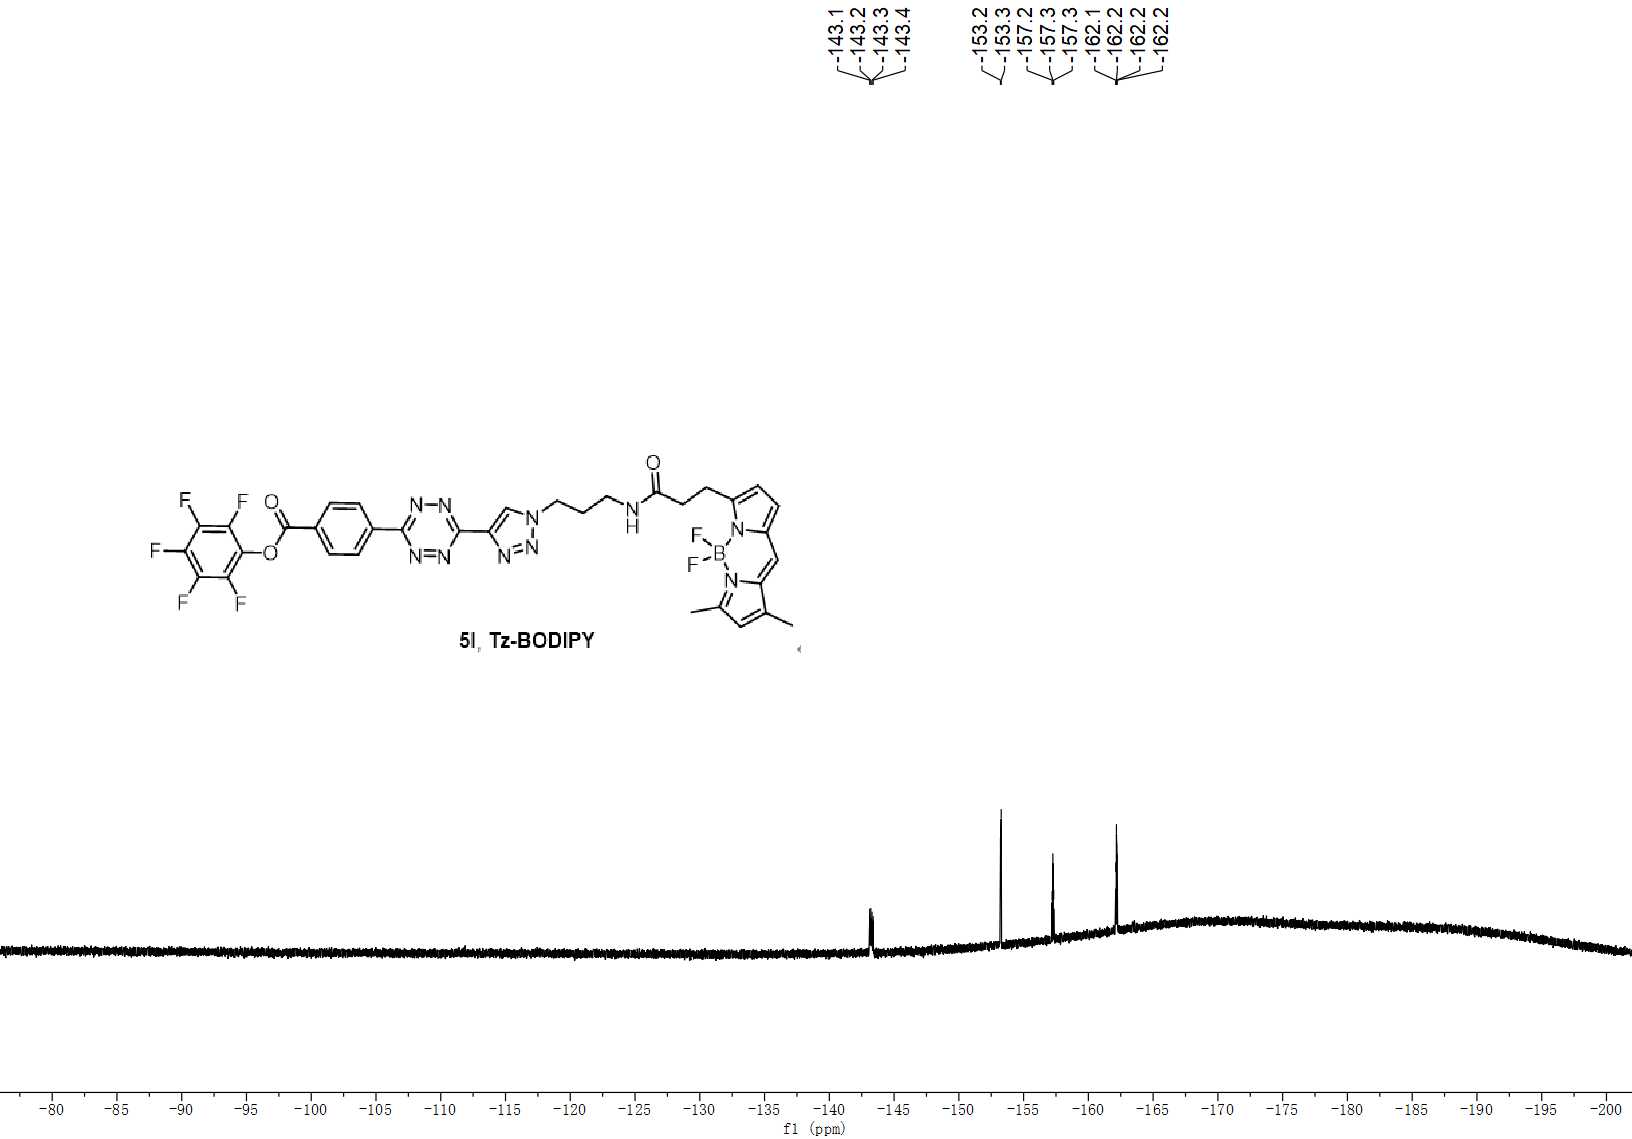

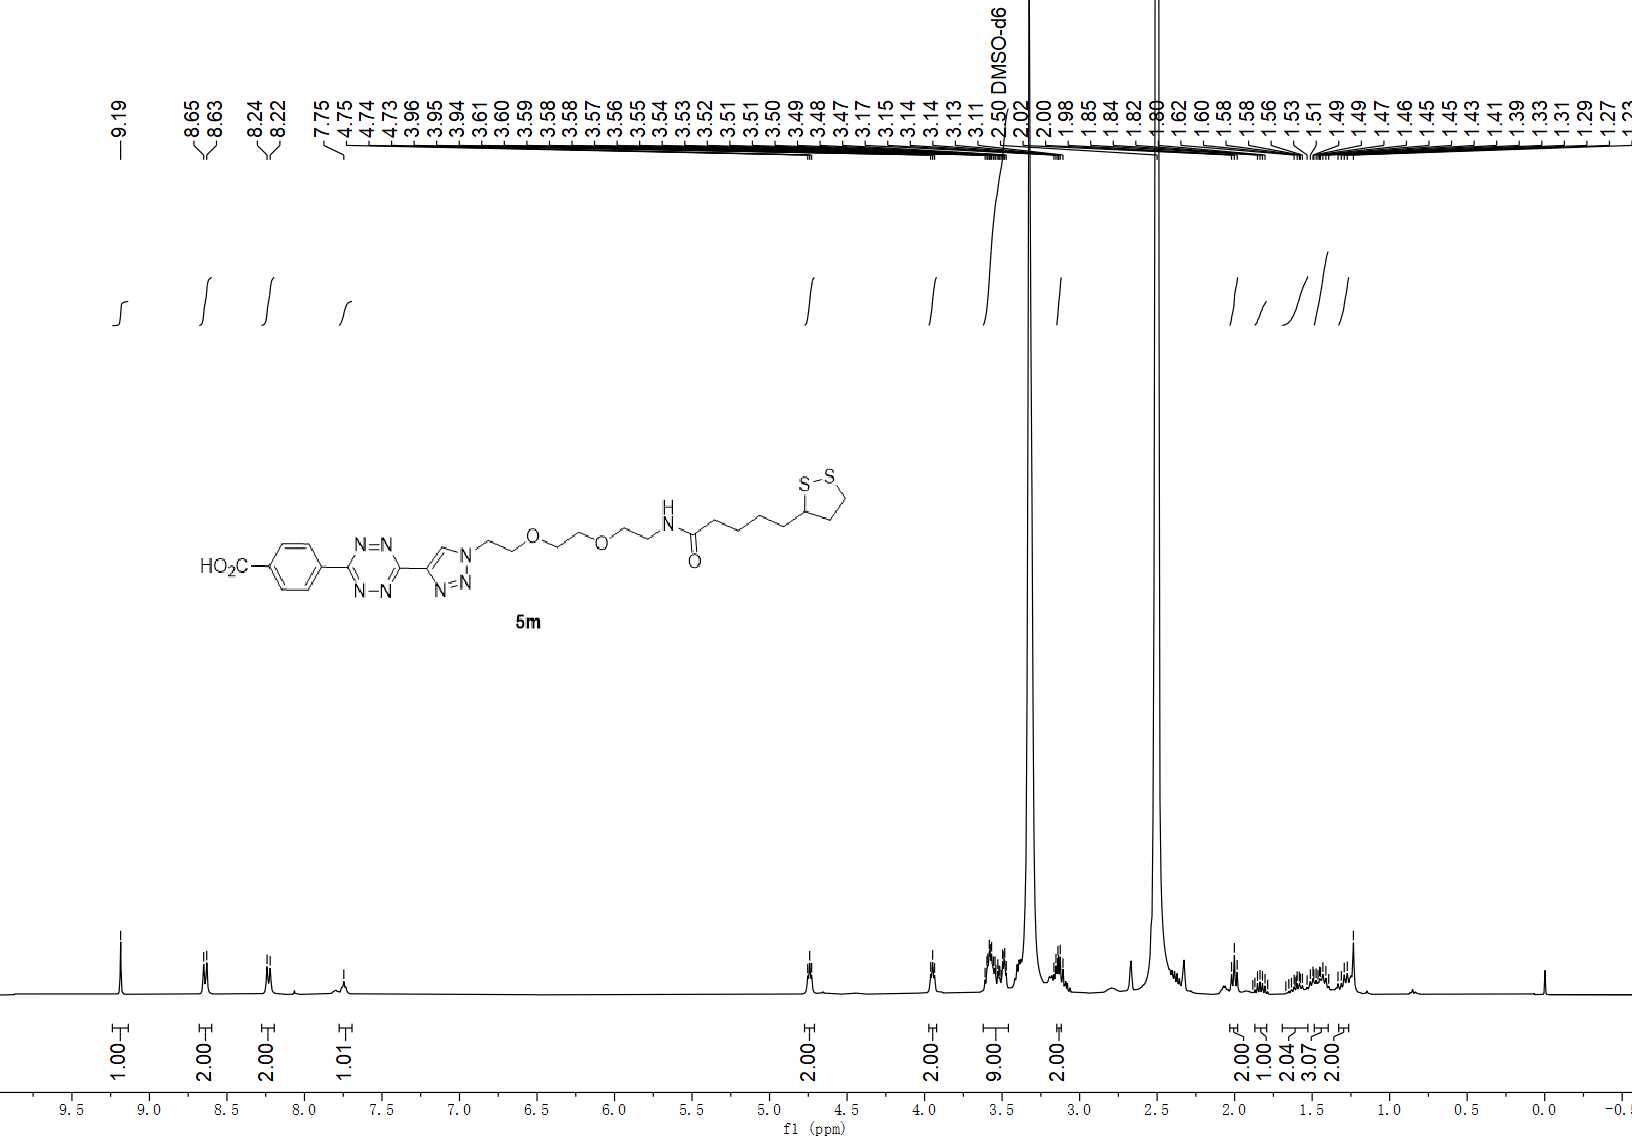

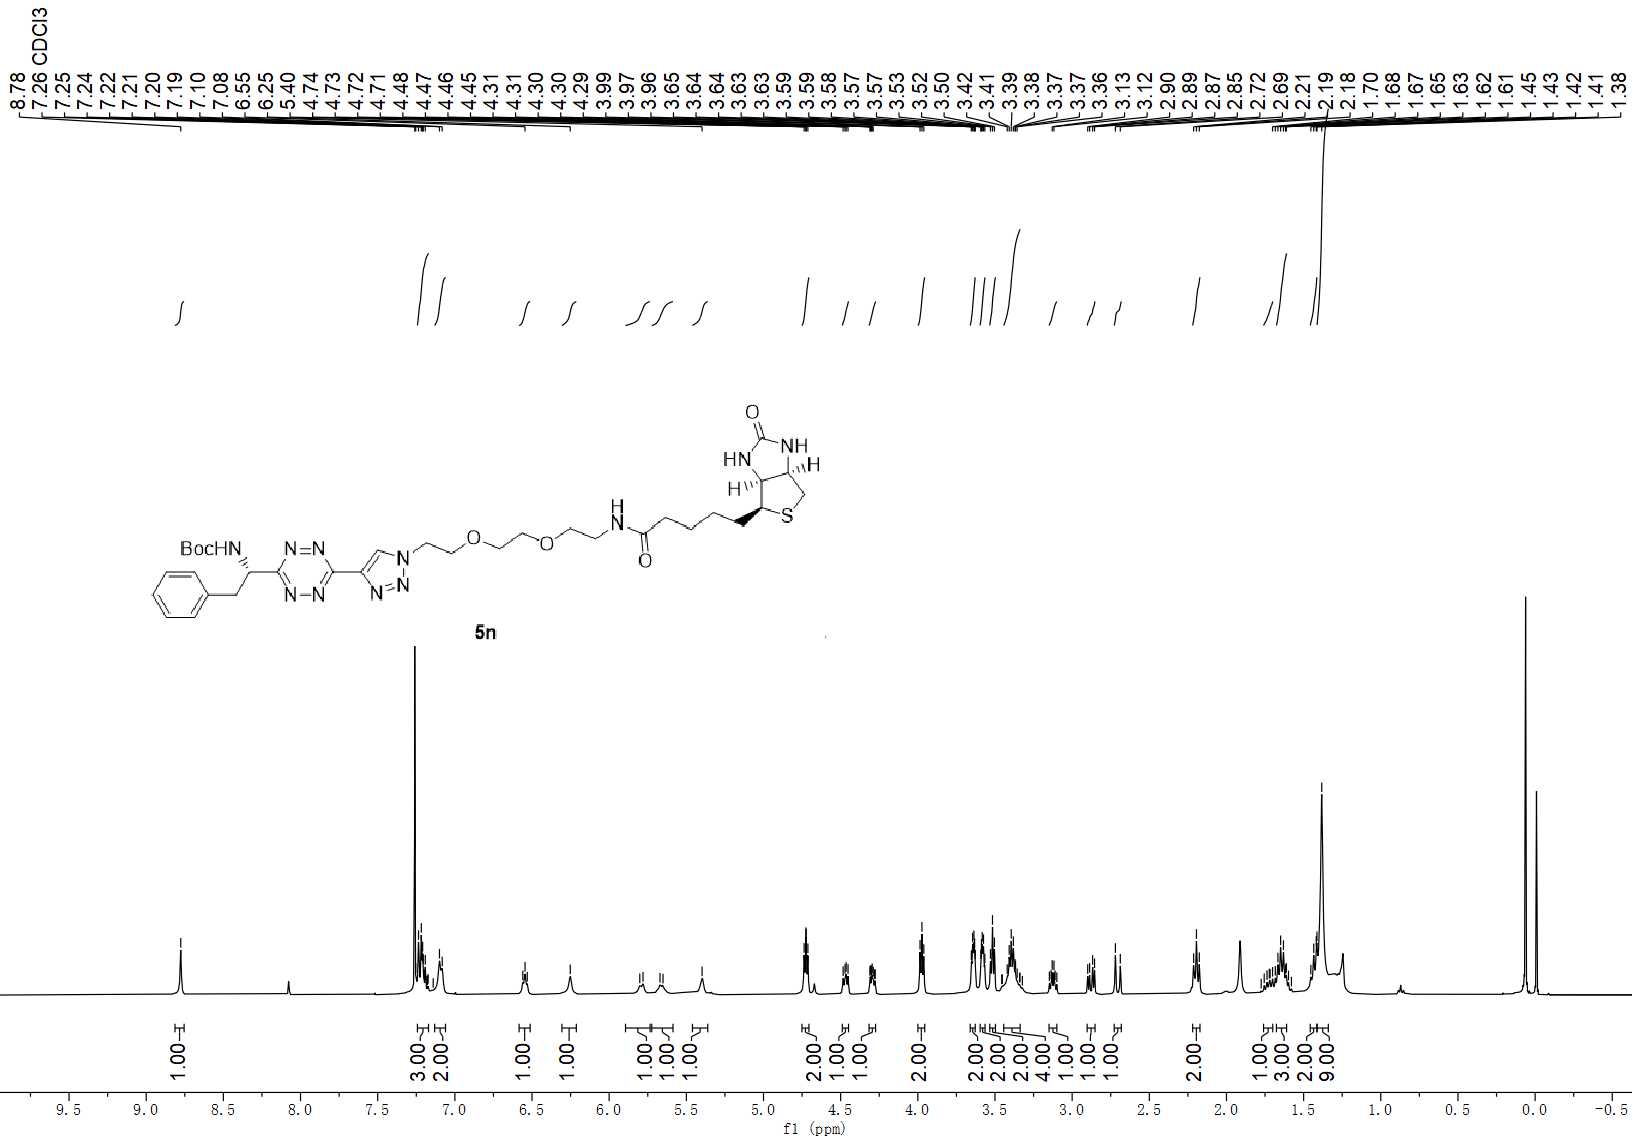

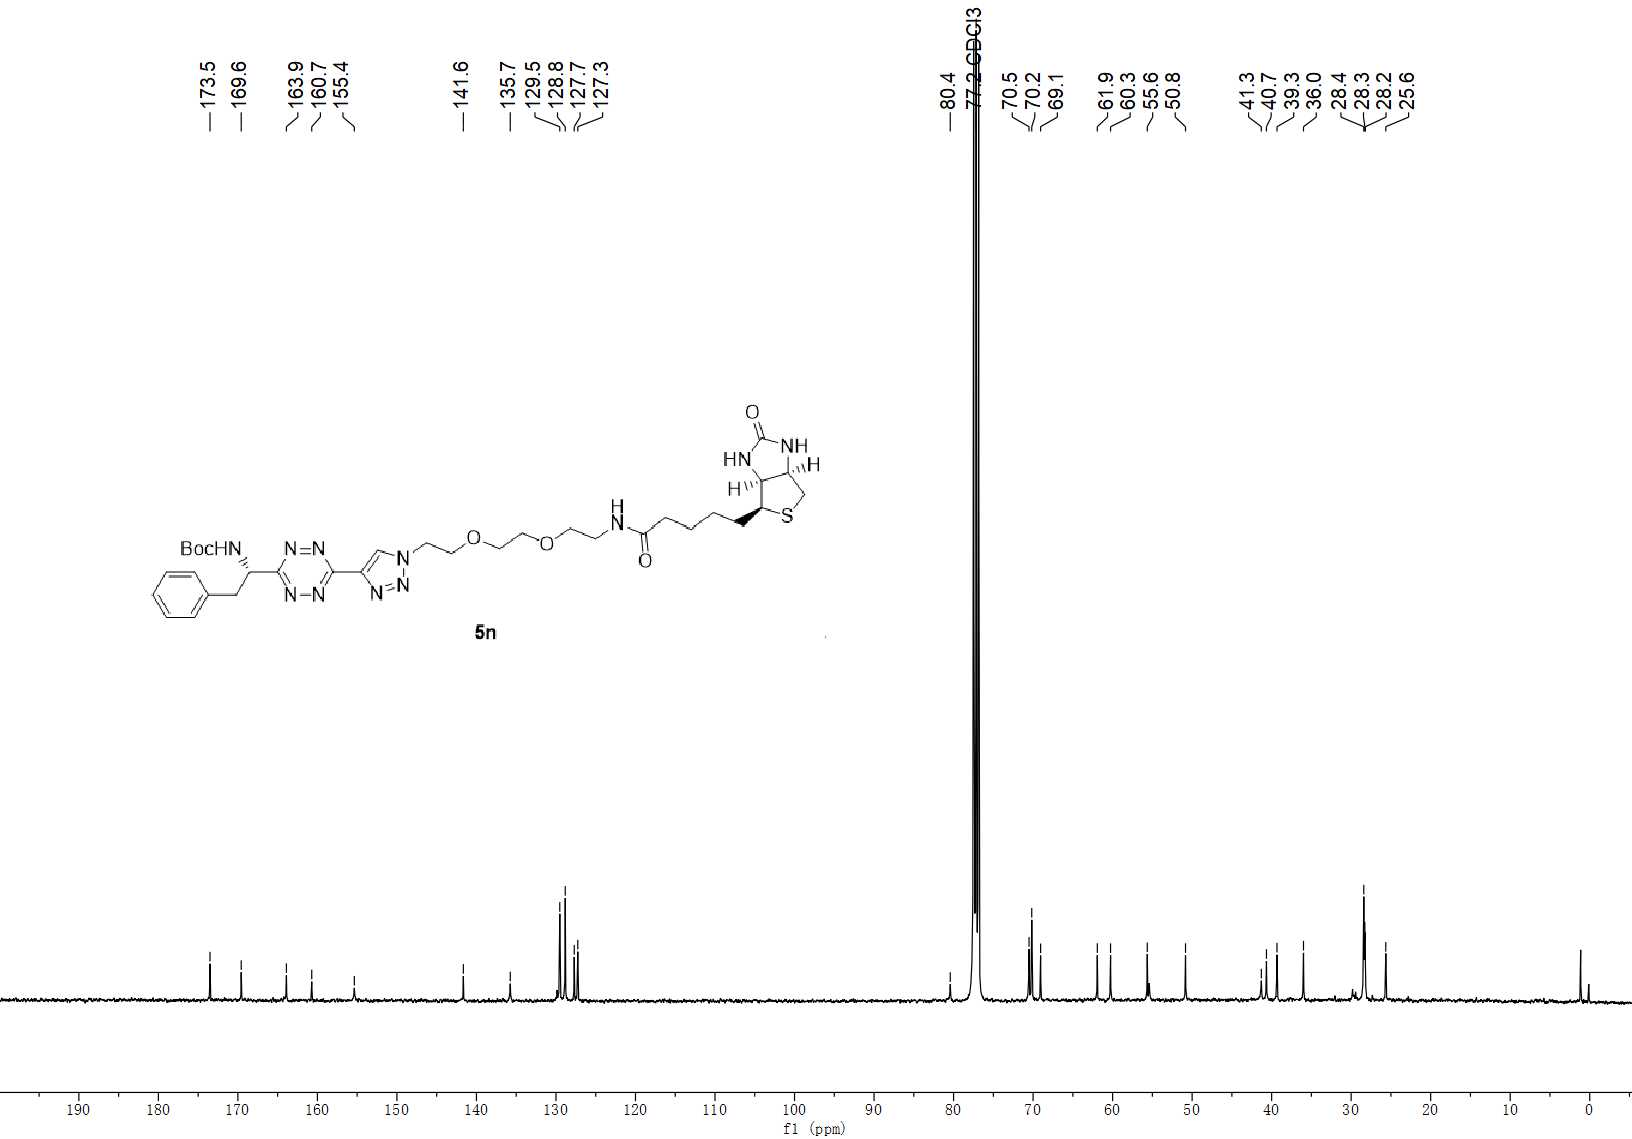

Supplement: Supplementary file 1 [file 098204abdeb837e1d8a129e2.docx]
